# Supplementary material for: Genomic characterization and phylogenetic analysis of Salmonella enterica serovar Javiana
Source: PeerJ. 2020 Nov 20;8:e10256. doi: 10.7717/peerj.10256 (PMC7682435; doi:10.7717/peerj.10256)
Supplement: Data S1 [file peerj-08-10256-s005.xlsx]

## Sheet: Data Set S1. Isolate Info
Data S1. Isolate details, IDs, and Assembly Statistics
SRA ID		BioSample ID		Strain (WGS ID)		PFGE XbaI Pattern		Region		Isolation Month		Isolation Year		Description		Clade		Avg. Coverage (x)		No. contigs		L50		L75		Total length (kb)		N50 (kb)		N75 (kb)		GC (%)
SRS2420927		SAMN07455299		PNUSAS017227		JGGX01.0745		East		Mar		2017		internal reference		I		94.4357		71		3		5		4729		690.152		394.332		52.21
SRS2525483		SAMN07638177		PNUSAS022944		JGGX01.0119		West		May		2017				I		159.325		70		3		6		4678.81		592.107		384.675		52.02
SRS2547237		SAMN07693673		PNUSAS023986		JGGX01.0302		Middle		Jun		2017				I		73.0059		50		4		6		4702.14		647.759		386.397		52.06
SRS2547417		SAMN07694678		PNUSAS024034		JGGX01.3072		East		Jun		2017				I		66.7787		68		4		6		4636.93		683.392		394.332		52.15
SRS2609391		SAMN07788219		PNUSAS025740		JGGX01.0012		West		Jul		2017				I		113.121		52		4		6		4564.43		683.392		386.395		52.19
SRS2628553		SAMN07816630		PNUSAS025911		JGGX01.3081		West		Jul		2017				I		69.0573		57		3		6		4754.79		665.159		231.562		52.04
SRS2628565		SAMN07816643		PNUSAS025924		JGGX01.0012		Middle		Jul		2017				I		148.456		67		3		5		4571.92		647.857		394.332		52.18
SRS2660215		SAMN07958188		PNUSAS026758		JGGX01.0012		West		Aug		2017				I		112.622		54		3		5		4568.58		698.942		394.332		52.2
SRS2761182		SAMN08161578		PNUSAS029742		JGGX01.0013		East		Aug		2017				I		63.6526		53		4		7		4700.63		479.014		275.251		52.06
SRS2761294		SAMN08161587		PNUSAS029751		JGGX01.3107		West		Aug		2017				I		58.2686		42		3		5		4648.58		683.393		431.77		52.15
SRS2783476		SAMN08182053		PNUSAS030317		JGGX01.0094		East		Aug		2017				I		68.6846		93		6		12		4741.09		263.011		176.199		52.17
SRS2845130		SAMN08370173		PNUSAS030980		JGGX01.0012		West		Aug		2017				I		109.79		66		3		6		4589.78		490.113		384.03		52.16
SRS2850296		SAMN08380031		PNUSAS032003		JGGX01.0107		Middle		Aug		2017				I		52.3563		56		3		7		4776.27		665.384		208.83		52.08
SRS2895509		SAMN08395880		PNUSAS032456		JGGX01.0092		West		Aug		2017				I		113.667		52		3		6		4582.31		492.09		241.028		52.19
SRS2922972		SAMN08481425		PNUSAS033308		JGGX01.0013		West		Sep		2017				I		84.9982		57		4		7		4652.91		408.355		368.776		52.09
SRS2938622		SAMN08513783		PNUSAS032207		JGGX01.0098		West		Aug		2017				I		84.463		64		5		8		4604.9		369.516		284.877		52.14
SRS2938629		SAMN08513773		PNUSAS033429		JGGX01.0012		West		Sep		2017				I		51.6558		61		8		14		4561.33		212.993		173.487		52.19
SRS2938662		SAMN08513848		PNUSAS033442		JGGX01.0182		Middle		Sep		2017				I		106.042		108		5		10		4577.28		252.534		173.956		52.23
SRS2998847		SAMN08607451		PNUSAS033280		JGGX01.0028		West		Sep		2017				I		160.918		66		4		6		4627.23		651.759		394.346		52.19
SRS2998869		SAMN08607488		PNUSAS033293		JGGX01.1011		East		Sep		2017				I		62.1043		103		10		20		4650.74		149.03		93.178		52.17
SRS2998873		SAMN08607479		PNUSAS033296		JGGX01.0087		West		Sep		2017				I		53.9169		99		13		24		4637.11		133.949		77.128		52.07
SRS2998915		SAMN08607500		PNUSAS034244		JGGX01.0012		East		Oct		2017				I		76.8348		67		8		15		4673.38		204.094		133.873		52.11
SRS3007164		SAMN08622885		PNUSAS033757		JGGX01.0012		West		Sep		2017				I		55.3746		60		6		11		4561.01		313.779		115.379		52.19
SRS3007170		SAMN08622883		PNUSAS033837		JGGX01.0098		West		Sep		2017				I		98.0727		48		3		5		4600.82		683.392		394.332		52.15
SRS3080274		SAMN08773434		PNUSAS035489		JGGX01.1513		West		Dec		2017				I		89.0695		43		3		5		4564.52		698.933		394.332		52.2
SRS3080280		SAMN08773452		PNUSAS035801		JGGX01.1513		West		Dec		2017				I		74.8306		47		3		6		4563.53		683.392		378.106		52.2
SRS3218596		SAMN08981900		PNUSAS039125		JGGX01.0024		East		Mar		2018				I		46.5728		108		13		27		4564.21		101.873		65.607		52.21
SRS3384774		SAMN09374999		PNUSAS042482		JGGX01.0092		West		May		2018				I		167.074		83		6		15		4579.45		220.118		96.694		52.21
SRS3453937		SAMN09479065		PNUSAS043657		JGGX01.0098		West		May		2018				I		115.048		65		4		6		4606.22		648.041		386.395		52.16
SRS3453943		SAMN09479071		PNUSAS043655		JGGX01.0092		West		May		2018				I		70.7351		52		3		6		4635.56		700.619		394.346		52.19
SRS3471848		SAMN09501432		PNUSAS044443		JGGX01.0043		Middle		Jun		2018				I		49.6534		64		3		6		4632.37		683.392		385.485		52.15
SRS3471904		SAMN09501428		PNUSAS043466		JGGX01.3280		West		May		2018				I		126.04		107		3		5		4662.72		698.795		421.479		51.99
SRS3531727		SAMN09636665		PNUSAS045194		JGGX01.0012		West		Jun		2018				I		60.2568		63		5		9		4563		385.543		209.848		52.2
SRS3531728		SAMN09636619		PNUSAS044432		JGGX01.0053		Middle		May		2018				I		119.746		58		6		13		4582.85		247.459		122.558		52.24
SRS3570561		SAMN09703937		PNUSAS045754		JGGX01.0054		West		Jun		2018				I		37.3232		149		19		39		4551.25		73.944		45.21		52.23
SRS3614303		SAMN09744900		PNUSAS047446		JGGX01.0012		Middle		Jun		2018				I		85.5303		50		4		7		4563.41		394.332		384.009		52.18
SRS3614304		SAMN09744897		PNUSAS047449		JGGX01.0012		West		Jun		2018				I		55.2461		55		4		7		4561.92		478.089		211.742		52.19
SRS3643366		SAMN09788105		PNUSAS049322		JGGX01.0012		West		Jul		2018				I		40.9027		46		6		10		4559.79		291.998		224.62		52.19
SRS3643394		SAMN09788145		PNUSAS049327		JGGX01.3328		West		Jul		2018				I		83.3835		27		3		5		4594.85		717.534		459.67		52.21
SRS3703451		SAMN09881898		PNUSAS050871		N/A		East		Jul		2018				I		33.4176		60		4		7		4570.64		394.329		374.261		52.16
SRS3703452		SAMN09881904		PNUSAS050954		JGGX01.0012		East		Jul		2018				I		65.9051		74		8		15		4556.54		195.759		105.068		52.21
SRS3703470		SAMN09881909		PNUSAS051260		N/A		East		Jul		2018				I		76.042		65		7		14		4596.12		282.864		106.873		52.19
SRS3708648		SAMN09905896		PNUSAS050853		JGGX01.0147		East		Jul		2018				I		48.7839		51		4		7		4638.34		421.448		384.919		52.04
SRS3721753		SAMN09928134		PNUSAS051321		JGGX01.0012		West		Jul		2018				I		45.3308		60		6		11		4557.83		301.767		113.049		52.21
SRS3742747		SAMN09981134		PNUSAS052090		JGGX01.0098		West		Aug		2018				I		106.765		89		9		19		4598.01		158.187		97.463		52.17
SRS3742753		SAMN09981131		PNUSAS052093		JGGX01.0017		West		Aug		2018				I		89.09		119		13		27		4609.47		98.575		65.966		52.19
SRS3855333		SAMN10142333		PNUSAS054623		JGGX01.0012		West		Aug		2018				I		97.0833		53		6		11		4561.5		289.521		197.796		52.19
SRS3871671		SAMN10170845		PNUSAS055933		JGGX01.0012		East		Aug		2018				I		74.8059		70		7		15		4560.6		212.586		101.03		52.2
SRS3871678		SAMN10170841		PNUSAS056144		JGGX01.0012		West		Aug		2018				I		57.6638		58		6		10		4559.37		289.401		202.496		52.2
SRS3876540		SAMN10176957		PNUSAS056365		JGGX01.0012		Middle		Sep		2018				I		59.0871		62		6		11		4561.34		318.235		147.979		52.2
SRS3877810		SAMN10177581		PNUSAS056401		JGGX01.0012		East		Sep		2018				I		73.9615		86		9		19		4557.7		169.785		84.543		52.21
SRS3892739		SAMN10222512		PNUSAS056622		JGGX01.0036		West		Sep		2018				I		134.321		116		4		6		4659.53		683.392		386.396		52.16
SRS3932748		SAMN10241201		PNUSAS056896		JGGX01.2521		West		Sep		2018				I		67.9978		68		6		13		4561.25		289.394		113.019		52.2
SRS3932840		SAMN10241217		PNUSAS057513		JGGX01.0349		East		Sep		2018		multistate outbreak		I		59.3585		54		4		7		4775.71		428.383		278.784		52.1
SRS2442409		SAMN07504958		PNUSAS020803		JGGX01.2310		Middle		Apr		2017				II		72.7987		61		3		8		4630.54		426.426		173.306		52.11
SRS2822480		SAMN08326714		PNUSAS031303		JGGX01.0362		East		Aug		2017		internal reference		II		128.647		63		3		6		4743.93		463.103		301.841		52.04
SRS3944395		SAMN10251410		PNUSAS057851		JGGX01.1396		Middle		Sep		2018		multistate outbreak		II		82.3089		68		6		12		4700.91		293.285		145.528		52.05
SRS3975519		SAMN10287209		PNUSAS058726		JGGX01.1396		Middle		Sep		2018		multistate outbreak		II		83.0812		99		10		22		4701.13		145.873		72.489		52.07
SRS2420915		SAMN07455295		PNUSAS017224		JGGX01.0179		West		Feb		2017				III		48.6766		62		3		5		4710.31		756.31		394.54		52.05
SRS2420931		SAMN07455305		PNUSAS017234		JGGX01.0179		West		Mar		2017				III		50.4765		61		3		5		4712.24		756.304		394.78		52.05
SRS2532115		SAMN07662724		PNUSAS022024		JGGX01.1554		West		May		2017				III		68.4547		57		3		5		4659.16		756.298		394.78		52.03
SRS2609377		SAMN07788204		PNUSAS024869		JGGX01.0065		West		Jun		2017				III		113.406		49		2		4		4675.82		756.322		394.78		52.05
SRS2609378		SAMN07788201		PNUSAS024866		JGGX01.0072		Middle		Jun		2017				III		56.6626		46		2		4		4677.45		756.311		394.78		52.05
SRS2609380		SAMN07788202		PNUSAS024867		JGGX01.0065		West		Jul		2017				III		81.8562		45		2		4		4684.78		756.188		394.78		52.03
SRS2609382		SAMN07788211		PNUSAS025356		JGGX01.0072		East		Jul		2017				III		86.7116		56		3		6		4655.11		697.621		391.416		52.03
SRS2660207		SAMN07958190		PNUSAS026760		JGGX01.0595		West		Aug		2017				III		108.073		82		3		6		4770.58		651.935		391.402		51.86
SRS2695323		SAMN08014279		PNUSAS027703		JGGX01.0065		West		Jul		2017				III		52.8763		83		8		17		4664.92		181.222		96.796		52.07
SRS2761300		SAMN08161589		PNUSAS029753		JGGX01.0333		East		Aug		2017				III		40.6062		79		5		8		4591.58		354.914		268.344		52.1
SRS2845135		SAMN08370171		PNUSAS030978		JGGX01.0165		West		Aug		2017				III		83.4192		45		2		5		4676.59		579.62		286.8		52.05
SRS2850289		SAMN08380027		PNUSAS031999		JGGX01.0470		West		Aug		2017				III		78.0506		57		4		7		4635.88		426.692		378.442		52.03
SRS2926162		SAMN08044076		PNUSAS027589		JGGX01.0179		West		Jul		2017				III		121.582		66		4		7		4712.39		394.78		382.748		52.06
SRS2938625		SAMN08513778		PNUSAS033424		JGGX01.0165		West		Sep		2017				III		69.2176		92		7		14		4646.81		226.463		128.211		52.05
SRS2938638		SAMN08513784		PNUSAS033440		JGGX01.0072		West		Sep		2017				III		101.852		61		5		8		4674.98		385.228		342.633		52.06
SRS2961449		SAMN08543822		PNUSAS033863		JGGX01.0065		West		Oct		2017				III		53.8142		83		7		13		4702.61		235.114		136.555		52.03
SRS2998834		SAMN08607413		PNUSAS033273		JGGX01.0135		East		Aug		2017				III		93.3298		124		16		33		4596.74		90.02		54.225		52.07
SRS2998855		SAMN08607441		PNUSAS033284		JGGX01.0065		West		Aug		2017				III		83.8151		62		4		7		4667.78		591.519		298.641		52.05
SRS2998913		SAMN08607498		PNUSAS034402		JGGX01.1694		West		Oct		2017				III		48.3663		65		4		6		4632.98		653.262		387.856		52.05
SRS3010019		SAMN08628102		PNUSAS034201		JGGX01.0179		West		Sep		2017		internal reference		III		82.8026		46		2		4		4708.28		756.304		394.78		52.05
SRS3021992		SAMN08639001		PNUSAS035139		JGGX01.0066		West		Nov		2017				III		65.1405		68		3		6		4684.86		697.579		383.403		52.04
SRS3021995		SAMN08639004		PNUSAS035138		JGGX01.0065		West		Nov		2017				III		33.7037		72		3		6		4674.67		486.448		383.675		52.06
SRS3080188		SAMN08773418		PNUSAS034521		JGGX01.0065		West		Oct		2017				III		66.1251		54		3		5		4671.89		756.322		394.77		52.05
SRS3242649		SAMN09011604		PNUSAS039552		JGGX01.0072		West		Sep		2017				III		57.8969		137		12		26		4669.86		105.483		61.137		52.1
SRS3277971		SAMN09101029		PNUSAS039538		JGGX01.0165		West		Aug		2017				III		83.3143		67		3		5		4685.95		435.017		400.238		52.05
SRS3597673		SAMN09722838		PNUSAS047256		JGGX01.0065		West		Jun		2018				III		66.715		56		3		7		4671.98		412.995		289.096		52.06
SRS3623378		SAMN09761701		PNUSAS047894		JGGX01.0179		West		May		2018				III		79.7735		117		10		22		4699.14		143.545		76.103		52.09
SRS3623430		SAMN09761703		PNUSAS047892		JGGX01.0072		West		Jun		2018				III		78.3609		81		7		12		4673.88		311.351		152.819		52.07
SRS3643364		SAMN09788117		PNUSAS048471		JGGX01.0065		West		Jul		2018				III		46.029		178		16		36		4667.82		76.499		44.691		52.11
SRS3643397		SAMN09788143		PNUSAS049047		JGGX01.0065		West		Jul		2018				III		34.3948		102		10		21		4731.12		127.817		87.816		52.06
SRS3643408		SAMN09788140		PNUSAS049111		JGGX01.0179		West		Jul		2018				III		50.7118		70		5		9		4708.59		352.904		226.5		52.07
SRS3676310		SAMN09843340		PNUSAS049805		JGGX01.0072		West		Jul		2018				III		56.3593		68		4		8		4676.05		422.106		229.015		52.05
SRS3703468		SAMN09881910		PNUSAS051259		JGGX01.0072		Middle		Jul		2018				III		90.2398		95		7		15		4649.77		220.068		97.154		52.05
SRS3721793		SAMN09928183		PNUSAS051334		JGGX01.0065		West		Jul		2018				III		59.0106		136		13		26		4668.69		115.198		71.706		52.08
SRS3721795		SAMN09928179		PNUSAS051658		JGGX01.0179		West		Aug		2018				III		104.272		67		6		11		4692.61		319.092		183.143		52.07
SRS3721796		SAMN09928180		PNUSAS051657		JGGX01.0072		West		Aug		2018				III		109.641		60		5		8		4696.15		390.766		300.933		52.02
SRS3737739		SAMN09952605		PNUSAS052069		JGGX01.0072		Middle		Aug		2018				III		77.8998		113		11		22		4664.75		146.739		76.988		52.07
SRS3753120		SAMN09990350		PNUSAS052554		JGGX01.0072		Middle		Aug		2018				III		89.9737		90		6		12		4665.51		265.394		148.039		52.07
SRS3799118		SAMN10088702		PNUSAS054222		JGGX01.0165		West		Aug		2018				III		107.649		63		4		7		4646.72		412.344		297.629		52.04
SRS3871596		SAMN10170834		PNUSAS055745		JGGX01.0179		West		Aug		2018				III		62.7176		47		2		4		4708.14		756.31		388.571		52.04
SRS3871610		SAMN10170825		PNUSAS055739		JGGX01.0065		West		Aug		2018				III		70.2842		59		3		5		4686.15		697.585		422.08		52.02
SRS3876542		SAMN10176956		PNUSAS056369		JGGX01.1694				Sep		2018				III		64.1879		109		8		17		4623.77		175.195		85.11		52.1
SRS3877801		SAMN10177582		PNUSAS056399		JGGX01.0065		West		Sep		2018				III		68.7659		81		5		12		4659.47		247.459		101.474		52.05
SRS3877812		SAMN10177569		PNUSAS056266		JGGX01.0065		West		Aug		2018				III		197.072		65		3		5		4685.99		711.835		394.78		52.04
SRS3932734		SAMN10241190		PNUSAS056618		JGGX01.0065		West		Sep		2018				III		62.8087		73		6		10		4670.39		297.444		181.296		52.06
SRS3944382		SAMN10251395		PNUSAS057854		JGGX01.0165		West		Sep		2018				III		106.199		68		4		7		4679.57		398.883		319.113		52.05
SRS3950101		SAMN10258263		PNUSAS056901		JGGX01.0065		West		Sep		2018				III		68.1687		68		2		4		4676.38		758.461		422.107		52.04
SRS3975507		SAMN10287210		PNUSAS058724		JGGX01.0065		West		Sep		2018				III		47.8494		132		14		29		4677.48		97.446		58.653		52.07
SRS2442415		SAMN07504951		PNUSAS020796		JGGX01.3049		Middle		Apr		2017				N/A		100.588		73		4		7		4765.95		453.386		228.192		52.14
SRS2547178		SAMN07693542		PNUSAS024050		JGGX01.3064		Middle		Jun		2017				N/A		75.6077		72		2		6		4793.68		619.322		227.558		51.99
SRS2628542		SAMN07816633		PNUSAS025914		JGGX01.0407		East		May		2017				N/A		68.2805		48		3		5		4594.92		493.884		420.567		52.18
SRS2655760		SAMN07949698		PNUSAS026482		JGGX01.0488		Middle		Jul		2017				N/A		89.3416		42		3		6		4593.15		596.45		227.591		52.12
SRS2709963		SAMN08044079		PNUSAS027592		JGGX01.0867		West		Aug		2017				N/A		74.6228		35		3		5		4572		752.783		426.692		52.13
