# Supplementary material for: Genomic characterization and phylogenetic analysis of Salmonella enterica serovar Javiana
Source: PeerJ. 2020 Nov 20;8:e10256. doi: 10.7717/peerj.10256 (PMC7682435; doi:10.7717/peerj.10256)
Supplement: Data S3 — Isolate datasets used to construct minimal spanning trees for the following serovars: (A) Javiana, (B) Derby, (C) Kentucky, (D) Mississippi, (E) Montevideo, (F) Newport, (G) Saintpaul, and (H) Senftenberg. Includes strain identifiers, metadata (e.g., source, location), and experimental data (e.g., in silico serotyping, MLST, cgMLST, wgMLST, and assembly stats). Datasets are also publicly available on EnteroBase. [file peerj-08-10256-s007.xlsx]

## Sheet: Data S3
Data S3. Polyphyletic Serovar Datasets
Isolate datasets used to construct minimal spanning trees for the following serovars: (A) Javiana, (B) Derby, (C) Kentucky, (D) Mississippi, (E) Montevideo, (F) Newport, (G) Saintpaul, and (H) Senftenberg. Includes strain identifiers, metadata (e.g., source, location), and experimental data (e.g., in silico serotyping, MLST, cgMLST, wgMLST, and assembly stats). Datasets are also publicly availabl…
Tab	Serovar	No. Strains	EnteroBase url
A_Javiana	Javiana	3787	EnteroBase_Javiana_Workspace
B_Derby	Derby	3042	EnteroBase_Derby_Workspace
C_Kentucky	Kentucky	8435	EnteroBase_Kentucky_Workspace
D_Mississippi	Mississippi	893	EnteroBase_Mississippi_Workspace
E_Montevideo	Montevideo	4445	EnteroBase_Montevideo_Workspace
F_Newport	Newport	11034	EnteroBase_Newport_Workspace
G_Saintpaul	Saintpaul	3864	EnteroBase_Saintpaul_Workspace
H_Senftenberg	Senftenberg	2433	EnteroBase_Senftenberg_Workspace

## Sheet: A_Javiana
IDENTIFIERS								DATES		METADATA																						SISTR1				SeqSero2				ACHTMAN 7 GENE MLST
Uberstrain	Name	Barcode	Assembly Barcode	Bio Project ID	Project ID	Sample ID	Secondary Sample ID	Date Entered	Release Date	Source Niche	Source Type	Source Details	Collection Year	Collection Month	Collection Day	Collection Time	Continent	Country	Region	District	City	Post Code	Latitude	Longitude	Serovar	Subsp.	Disease	Antigenic Formulas	Phage Type	Lab Contact	Comment	Serovar2	Serogroup	H1	H2	Serovar3	Serogroup2	H12	H22	ST	eBG	Serotype (Predicted)	Lineage	Subsp.2	aroC	dnaN	hemD	hisD	purE
SAL_AB0071AA	814322	SAL_AB0071AA	SAL_SB7065AA_AS	PRJNA248792	SRP042645	SAMN12995376	SRS5491805	2019-10-18	2019-10-09	Human	Human	Homo sapiens; human	2019	9			Europe	United Kingdom							Javiana	I				Public Health England		Javiana	D1	l,z28	1,5	Javiana	9	l,z28	1,5	24	17	Javiana	Lineage 3		13	12	17	16	13
SAL_AB0081AA	818168	SAL_AB0081AA	SAL_SB7055AA_AS	PRJNA248792	SRP042645	SAMN12995359	SRS5491794	2019-10-18	2019-10-09	Human	Human	Homo sapiens; human	2019	9			Europe	United Kingdom							Javiana	I				Public Health England		Javiana	D1	l,z28	1,5	Javiana	9	l,z28	1,5	1547	17	Javiana	Lineage 3		60	12	17	16	13
SAL_AB0099AA	814888	SAL_AB0099AA	SAL_SB7037AA_AS	PRJNA248792	SRP042645	SAMN12995326	SRS5491774	2019-10-18	2019-10-09	Human	Human	Homo sapiens; human	2019	9			Europe	United Kingdom							Javiana	I				Public Health England		Javiana	D1	l,z28	1,5	Javiana	9	l,z28	1,5	24	17	Javiana	Lineage 3		13	12	17	16	13
SAL_AB0128AA	814304	SAL_AB0128AA	SAL_SB7008AA_AS	PRJNA248792	SRP042645	SAMN12995341	SRS5491745	2019-10-18	2019-10-09	Human	Human	Homo sapiens; human	2019	9			Europe	United Kingdom							Javiana	I				Public Health England		Javiana	D1	l,z28	1,5	Javiana	9	l,z28	1,5	-1066	17	Javiana	Lineage 3		13	12	17	16	-10
SAL_AB0206AA	PNCS001488	SAL_AB0206AA	SAL_SB6930AA_AS	PRJNA543337	SRP199206	SAMN12910032	SRS5489816	2019-10-18	2019-10-08	Human	Human	Homo sapiens	2012	4			North America	Canada							Javiana	I				National Microbiology Laboratory		Javiana	D1	l,z28	1,5	Javiana	9	l,z28	1,5	371	17	Javiana	Lineage 3		13	12	17	16	117
SAL_AB0345AA	818940	SAL_AB0345AA	SAL_SB9296AA_AS	PRJNA248792	SRP042645	SAMN13021899	SRS5508189	2019-10-20	2019-10-13	Human	Human	Homo sapiens; human	2019	10			Europe	United Kingdom							Javiana	I				Public Health England		Javiana	D1	l,z28	1,5	Javiana	9	l,z28	1,5	24	17	Javiana	Lineage 3		13	12	17	16	13
SAL_AB0950AA	824486	SAL_AB0950AA	SAL_TB1721AA_AS	PRJNA248792	SRP042645	SAMN13105024	SRS5565519	2019-10-26	2019-10-24	Human	Human	Homo sapiens; human	2019	10			Europe	United Kingdom							Javiana	I				Public Health England		Javiana	D1	l,z28	1,5	Javiana	9	l,z28	1,5	24	17	Javiana	Lineage 3		13	12	17	16	13
SAL_AB1059AA	FDA1124763-C004-030	SAL_AB1059AA	SAL_TB1612AA_AS	PRJNA186035	SRP018785	SAMN13087153	SRS5555567	2019-10-26	2019-10-23	Environment	Plant	cucumbers	2019	9			North America	Mexico												FDA Center for Food Safety and Applied Nutrition		Javiana	D1	l,z28	1,5	Javiana	9	l,z28	1,5	24	17	Javiana	Lineage 3		13	12	17	16	13
SAL_AB1069AA	FDA1122978-010-001	SAL_AB1069AA	SAL_TB1602AA_AS	PRJNA186035	SRP018785	SAMN13086544	SRS5553628	2019-10-26	2019-10-23	Environment	Plant	papaya	2019	9			North America	Mexico												FDA Center for Food Safety and Applied Nutrition		Javiana	D1	l,z28	1,5	Javiana	9	l,z28	1,5	1547	17	Javiana	Lineage 3		60	12	17	16	13
SAL_AB1070AA	FDA1124763-C004-013	SAL_AB1070AA	SAL_TB1601AA_AS	PRJNA186035	SRP018785	SAMN13086542	SRS5553627	2019-10-26	2019-10-23	Environment	Plant	cucumbers	2019	9			North America	Mexico												FDA Center for Food Safety and Applied Nutrition		Javiana	D1	l,z28	1,5	Javiana	9	l,z28	1,5	24	17	Javiana	Lineage 3		13	12	17	16	13
SAL_AB1673AA	829070	SAL_AB1673AA	SAL_TB3756AA_AS	PRJNA248792	SRP042645	SAMN13154206	SRS5586190	2019-10-30	2019-10-30	Human	Human	Homo sapiens; human	2019	10			Europe	United Kingdom							Javiana	I				Public Health England		Javiana	D1	l,z28	1,5	Javiana	9	l,z28	1,5	371	17	Javiana	Lineage 3		13	12	17	16	117
SAL_AB1796AA	SMG-19-1822	SAL_AB1796AA	SAL_TB4451AA_AS					2019-11-01	2019-11-01								Europe	United Kingdom	Scotland											D. Brown (Scotland)		Javiana	D1	l,z28	1,5	Javiana	9	l,z28	1,5	371	17	Javiana	Lineage 3		13	12	17	16	117
SAL_AB1842AA	828982	SAL_AB1842AA	SAL_TB4510AA_AS	PRJNA248792	SRP042645	SAMN13173944	SRS5597859	2019-11-01	2019-11-01	Human	Human	Homo sapiens; human	2019	10			Europe	United Kingdom							Javiana	I				Public Health England		Javiana	D1	l,z28	1,5	Javiana	9	l,z28	1,5	1674	17	Javiana	Lineage 3		13	12	17	520	13
SAL_AB2112AA	SMG-19-1879	SAL_AB2112AA	SAL_TB5914AA_AS					2019-11-04	2019-11-04								Europe	United Kingdom	Scotland											D. Brown (Scotland)		Javiana	D1	l,z28	1,5	Javiana	9	l,z28	1,5	1547	17	Javiana	Lineage 3		60	12	17	16	13
SAL_AB8968AA	834832	SAL_AB8968AA	SAL_VB0139AA_AS	PRJNA248792	SRP042645	SAMN13245143	SRS5628859	2019-11-13	2019-11-09	Human	Human	Homo sapiens; human	2019	10			Europe	United Kingdom							Javiana	I				Public Health England		Javiana	D1	l,z28	1,5	Javiana	9	l,z28	1,5	371	17	Javiana	Lineage 3		13	12	17	16	117
SAL_AB9078AA	835415	SAL_AB9078AA	SAL_VB0532AA_AS	PRJNA248792	SRP042645	SAMN13265771	SRS5637172	2019-11-14	2019-11-13	Human	Human	Homo sapiens; human	2019	10			Europe	United Kingdom							Javiana	I				Public Health England		Javiana	D1	l,z28	1,5	Javiana	9	l,z28	1,5	1674	17	Javiana	Lineage 3		13	12	17	520	13
SAL_AB9692AA	PNUSAS071825	SAL_AB9692AA	SAL_VB4010AA_AS	PRJNA230403	SRP040281	SAMN11397538	SRS4610849	2019-11-18	2019-04-11	Environment	Plant	Liner	2019	3			North America	United States												Centers for Disease Control and Prevention Enteric Diseases Laboratory Branch		Javiana	D1	l,z28	l,z13,z28		9	l,z28	-	24	17	Javiana	Lineage 3		13	12	17	16	13
SAL_BA0805AA	CFSAN034934	SAL_BA0805AA	SAL_EA2825AA_AS	PRJNA183850	SRP028607	SAMN03795323	SRS1039626	2015-08-26	2015-08-18	Human	Human	Homo sapiens; stool	2015	3			North America	United States	New York						Javiana					Food and Drug Administration - Center for Food Safety and Applied Nutrition (US)		Javiana	B	l,z28	1,5		-	l,z28	1,5	1674	17	Javiana	Lineage 3		13	12	17	520	13
SAL_BA1183AA	CFSAN035073	SAL_BA1183AA	SAL_EA3083AA_AS	PRJNA183850	SRP028607	SAMN03795462	SRS1029794	2015-08-26	2015-08-12	Human	Human	Homo sapiens; stool	2015	5			North America	United States	New York						Javiana					Food and Drug Administration - Center for Food Safety and Applied Nutrition (US)		Javiana	D1	l,z28	1,5	Javiana	9	l,z28	1,5	2394	17	Javiana	Lineage 3		13	12	17	16	13
SAL_BA1208AA	CFSAN035070	SAL_BA1208AA	SAL_EA3102AA_AS	PRJNA183850	SRP028607	SAMN03795459	SRS1029719	2015-08-26	2015-08-12	Human	Human	Homo sapiens; stool	2015	5			North America	United States	New York						Javiana					Food and Drug Administration - Center for Food Safety and Applied Nutrition (US)		Javiana	D1	l,z28	1,5	Javiana	9	l,z28	1,5	24	17	Javiana	Lineage 3		13	12	17	16	13
SAL_BA1301AA	FDA365004	SAL_BA1301AA	SAL_EA3151AA_AS	PRJNA186035	SRP018785	SAMN02844321	SRS1022611	2015-08-26	2015-08-04	Aquatic Animal	Fish	frz riverbarb	2006	1			Asia	Vietnam							Javiana	I				Food and Drug Administration - Center for Food Safety and Applied Nutrition (US)		Javiana	D1	l,z28	1,5	Javiana	9	l,z28	1,5	1547	17	Javiana	Lineage 3		60	12	17	16	13
SAL_BA1910AA	FDA509417	SAL_BA1910AA	SAL_EA3535AA_AS	PRJNA186035	SRP018785	SAMN02844666	SRS992375	2015-08-27	2015-07-14	Food	Plant	allspice	2008	12			North America	Mexico							Javiana	I				Food and Drug Administration - Center for Food Safety and Applied Nutrition (US)		Javiana	D1	l,z28	1,5	Javiana	9	l,z28	1,5	1674	17	Javiana	Lineage 3		13	12	17	520	13
SAL_BA2041AA	FDA343627-1	SAL_BA2041AA	SAL_EA3605AA_AS	PRJNA186035	SRP018785	SAMN02845699	SRS987300	2015-08-27	2015-07-10	Aquatic Animal	Fish	black drum	2005	7			North America	Mexico							Javiana	I				Food and Drug Administration - Center for Food Safety and Applied Nutrition (US)		Javiana	D1	l,z28	1,5	Javiana	9	l,z28	1,5	24	17	Javiana	Lineage 3		13	12	17	16	13
SAL_BA2165AA	FDA913405-1-3	SAL_BA2165AA	SAL_EA3677AA_AS	PRJNA186035	SRP018785	SAMN03799734	SRS978947	2015-08-27	2015-07-06	Food	Plant	spice, chili molido medium hot	2015	6			North America	United States	Colorado						Javiana (Predicted)					Food and Drug Administration - Center for Food Safety and Applied Nutrition (US)		Javiana	D1	l,z28	1,5	Javiana	9	l,z28	1,5	24	17	Javiana	Lineage 3		13	12	17	16	13
SAL_BA2458AA	FDA295465 1-1	SAL_BA2458AA	SAL_EA3815AA_AS	PRJNA186035	SRP018785	SAMN02845510	SRS967094	2015-08-27	2015-07-05	Aquatic Animal	Shellfish	frozen shrimp crab spring roll	2004	8			Asia	Vietnam							Javiana (Predicted)					Food and Drug Administration - Center for Food Safety and Applied Nutrition (US)		Javiana	D1	l,z28	1,5	Javiana	9	l,z28	1,5	1547	17	Javiana	Lineage 3		60	12	17	16	13
SAL_BA2566AA	FDA200195	SAL_BA2566AA	SAL_CA3104AA_AS	PRJNA186035	SRP018785	SAMN02843715	SRS971948	2015-08-27	2015-06-30	Aquatic Animal	Fish	frozen top shell	2002	10			Asia	Vietnam							Itami	I				Food and Drug Administration - Center for Food Safety and Applied Nutrition (US)		Javiana	D1	l,z28	1,5	Javiana	9	l,z28	1,5	1547	17	Javiana	Lineage 3		60	12	17	16	13
SAL_BA2934AA	CFSAN030660	SAL_BA2934AA	SAL_IA5925AA_AS	PRJNA186035	SRP018785	SAMN03464173	SRS969043	2015-08-27	2015-06-29	Environment	Water/River	water	2014	9			North America	United States	Georgia						Javiana (Predicted)					Food and Drug Administration - Center for Food Safety and Applied Nutrition (US)		Javiana	D1	l,z28	1,5	Javiana	9	l,z28	1,5	24	17	Javiana	Lineage 3		13	12	17	16	13
SAL_BA3477AA	CFSAN024560	SAL_BA3477AA	SAL_EA4157AA_AS	PRJNA217342	SRP029479	SAMN03464495	SRS930960	2015-08-27	2015-06-05	Environment	Water/River	water	2012	7			North America	Mexico	Sinaloa						Javiana (Predicted)	I				Food and Drug Administration - Center for Food Safety and Applied Nutrition (US)		Javiana	D1	l,z28	1,5	Javiana	9	l,z28	1,5	24	17	Javiana	Lineage 3		13	12	17	16	13
SAL_BA3482AA	CFSAN024531	SAL_BA3482AA	SAL_EA4164AA_AS	PRJNA217342	SRP029479	SAMN03464466	SRS930489	2015-08-27	2015-06-05	Environment	Water/River	water	2011	11			North America	Mexico	Sinaloa						Javiana (predicted)	I				Food and Drug Administration - Center for Food Safety and Applied Nutrition (US)		Javiana	D1	l,z28	1,5	Javiana	9	l,z28	1,5	24	17	Javiana	Lineage 3		13	12	17	16	13
SAL_BA3503AA	CFSAN024502	SAL_BA3503AA	SAL_EA4171AA_AS	PRJNA217342	SRP029479	SAMN03464437	SRS929154	2015-08-27	2015-06-05	Environment	Water/River	water	2011	10			North America	Mexico	Sinaloa						Javiana (predicted)	I				Food and Drug Administration - Center for Food Safety and Applied Nutrition (US)		Javiana	D1	l,z28	1,5	Javiana	9	l,z28	1,5	24	17	Javiana	Lineage 3		13	12	17	16	13
SAL_BA3537AA	CFSAN024561	SAL_BA3537AA	SAL_EA4203AA_AS	PRJNA217342	SRP029479	SAMN03464496	SRS930953	2015-08-27	2015-06-05	Environment	Water/River	water	2012	7			North America	Mexico	Sinaloa						Javiana (predicted)	I				Food and Drug Administration - Center for Food Safety and Applied Nutrition (US)		Javiana	D1	l,z28	1,5	Javiana	9	l,z28	1,5	24	17	Javiana	Lineage 3		13	12	17	16	13
SAL_BA3550AA	CFSAN006274	SAL_BA3550AA	SAL_BA4524AA_AS	PRJNA217342	SRP029479	SAMN02335412	SRS504650	2015-08-27	2015-06-05	Environment	Soil/Dust	environmental	2013	2			North America	Mexico	Sinaloa						Javiana	I				Food and Drug Administration - Center for Food Safety and Applied Nutrition (US)		Javiana	D1	l,z28	1,5	Javiana	9	l,z28	1,5	24	17	Javiana	Lineage 3		13	12	17	16	13
SAL_BA3573AA	CFSAN006277	SAL_BA3573AA	SAL_EA4230AA_AS	PRJNA217342	SRP029479	SAMN02335413	SRS512978	2015-08-27	2015-06-05	Environment	Soil/Dust	sediment	2013	6			North America	Mexico	Sinaloa						Javiana	I				Food and Drug Administration - Center for Food Safety and Applied Nutrition (US)		Javiana	D1	l,z28	1,5	Javiana	9	l,z28	1,5	24	17	Javiana	Lineage 3		13	12	17	16	13
SAL_BA3714AA	2015K-0281	SAL_BA3714AA	SAL_EA4300AA_AS	PRJNA230403	SRP040281	SAMN03732572	SRS953182	2015-08-27	2015-06-04								North America	United States							Javiana (Predicted)					Centers for Disease Control and Prevention - PulseNet		Javiana	D1	l,z28	1,5	Javiana	9	l,z28	1,5	24	17	Javiana	Lineage 3		13	12	17	16	13
SAL_BA3716AA	2015K-0229	SAL_BA3716AA	SAL_IA2647AA_AS	PRJNA230403	SRP040281	SAMN03754552	SRS953183	2015-08-27	2015-06-04	Human	Human	Age: 0-4	2014	8			North America	United States							Javiana					Centers for Disease Control and Prevention - PulseNet		Javiana	D1	l,z28	1,5	Javiana	9	l,z28	1,5	24	17	Javiana	Lineage 3		13	12	17	16	13
SAL_BA3722AA	2015K-0190	SAL_BA3722AA	SAL_IA1822AA_AS	PRJNA230403	SRP040281	SAMN03754551	SRS953186	2015-08-27	2015-06-04	Human	Human	Age: 30-39; stool	2014	7			North America	United States							Javiana					Centers for Disease Control and Prevention - PulseNet		Javiana	D1	l,z28	1,5	Javiana	9	l,z28	1,5	24	17	Javiana	Lineage 3		13	12	17	16	13
SAL_BA4670AA	CFSAN006239	SAL_BA4670AA	SAL_BA3820AA_AS	PRJNA217342	SRP029479	SAMN02335377	SRS476374	2015-08-27	2013-09-04	Environment	Water/River	water	2013	5			North America	Mexico	Sinaloa						Javiana	I				Food and Drug Administration - Center for Food Safety and Applied Nutrition (US)		Javiana	D1	l,z28	1,5	Javiana	9	l,z28	1,5	24	17	Javiana	Lineage 3		13	12	17	16	13
SAL_BA4671AA	CFSAN006238	SAL_BA4671AA	SAL_EA4735AA_AS	PRJNA217342	SRP029479	SAMN02335376	SRS476375	2015-08-27	2013-09-04	Environment	Water/River	water	2013	5			North America	Mexico	Sinaloa						Javiana	I				Food and Drug Administration - Center for Food Safety and Applied Nutrition (US)		Javiana	D1	l,z28	1,5	Javiana	9	l,z28	1,5	24	17	Javiana	Lineage 3		13	12	17	16	13
SAL_BA4984AA	CFSAN006226	SAL_BA4984AA	SAL_EA4858AA_AS	PRJNA243636	SRP056877	SAMN03218196	SRS909750	2015-08-27	2015-05-11	Wild Animal	Reptile	Trachemys scripta callirostris; hicotea turtle	2009	5			South America	Colombia	Cordoba	Monteria					Javiana	I				FDA Center for Food Safety and Applied Nutrition		Javiana	D1	l,z28	1,5	Javiana	9	l,z28	1,5	24	17	Javiana	Lineage 3		13	12	17	16	13
SAL_BA5394AA	CFSAN024611	SAL_BA5394AA	SAL_EA4987AA_AS	PRJNA217342	SRP029479	SAMN03464546	SRS930539	2015-08-27	2015-05-12	Environment	ND/Others	environment	2013	1			North America	Mexico	Sinaloa						Javiana (Predicted)					FDA Center for Food Safety and Applied Nutrition		Javiana	D1	l,z28	1,5	Javiana	9	l,z28	1,5	24	17	Javiana	Lineage 3		13	12	17	16	13
SAL_BA5434AA	CFSAN024577	SAL_BA5434AA	SAL_EA5000AA_AS	PRJNA217342	SRP029479	SAMN03464512	SRS930527	2015-08-27	2015-05-12	Environment	Plant	surface	2012	9			North America	Mexico	Sinaloa						Itami	I				Food and Drug Administration - Center for Food Safety and Applied Nutrition (US)		Javiana	D1	l,z28	1,5	Javiana	9	l,z28	1,5	24	17	Javiana	Lineage 3		13	12	17	16	13
SAL_BA5435AA	CFSAN006269	SAL_BA5435AA	SAL_EA5001AA_AS	PRJNA217342	SRP029479	SAMN02335407	SRS930486	2015-08-27	2015-05-12	Environment	Water/River	water	2011	11			North America	Mexico	Sinaloa						Javiana	I				Food and Drug Administration - Center for Food Safety and Applied Nutrition (US)		Javiana	D1	l,z28	1,5	Javiana	9	l,z28	1,5	24	17	Javiana	Lineage 3		13	12	17	16	13
SAL_BA5437AA	CFSAN024610	SAL_BA5437AA	SAL_EA5003AA_AS	PRJNA217342	SRP029479	SAMN03464545	SRS930448	2015-08-27	2015-05-12	Environment	Soil/Dust	environment	2013	1			North America	Mexico	Sinaloa						Javiana	I				Food and Drug Administration - Center for Food Safety and Applied Nutrition (US)		Javiana	D1	l,z28	1,5	Javiana	9	l,z28	1,5	24	17	Javiana	Lineage 3		13	12	17	16	13
SAL_BA5440AA	CFSAN024606	SAL_BA5440AA	SAL_EA5002AA_AS	PRJNA217342	SRP029479	SAMN03464541	SRS930445	2015-08-27	2015-05-12	Environment	Soil/Dust	sediment	2013	6			North America	Mexico	Sinaloa						Panama	I				Food and Drug Administration - Center for Food Safety and Applied Nutrition (US)		Javiana	D1	l,z28	1,5	Javiana	9	l,z28	1,5	24	17	Javiana	Lineage 3		13	12	17	16	13
SAL_BA5627AA	FSF0124	SAL_BA5627AA	SAL_EA5090AA_AS	PRJNA186035	SRP018785	SAMN02698086	SRS924013	2015-08-27	2015-04-28	Environment	Plant	fresh basil	2008	7			North America	Mexico								I				Food and Drug Administration - Center for Food Safety and Applied Nutrition (US)	serovar undetermined	Javiana	D1	l,z28	l,z13,z28		9	l,z28	-	24	17	Javiana	Lineage 3		13	12	17	16	13
SAL_BA5776AA	FLDOH-61	SAL_BA5776AA	SAL_EA5138AA_AS	PRJNA183848	SRP028812	SAMN03290506	SRS922207	2015-08-27	2015-04-24	Human	Human	Age: 60-69; stool; Homo sapiens	2013	11			North America	United States	Florida						Undetermined	I				FOOD AND DRUG ADMINISTRATION, CENTER FOR FOOD SAFETY AND APPLIED NUTRITION		Javiana	D1	l,z28	1,5	Javiana	9	l,z28	1,5	24	17	Javiana	Lineage 3		13	12	17	16	13
SAL_BA5781AA	FLDOH-82	SAL_BA5781AA	SAL_BA3365AA_AS	PRJNA183848	SRP028812	SAMN03290527	SRS922209	2015-08-27	2015-04-24	Human	Human	Homo sapiens; Age: 0-4; stool	2012	9			North America	United States	Florida						Undetermined	I				FDA Center for Food Safety and Applied Nutrition		Javiana	D1	l,z28	1,5	Javiana	9	l,z28	1,5	24	17	Javiana	Lineage 3		13	12	17	16	13
SAL_BA5789AA	FLDOH-57	SAL_BA5789AA	SAL_JA0574AA_AS	PRJNA183848	SRP028812	SAMN03290502	SRS922205	2015-08-27	2015-04-24	Human	Human	Age: 60-69; urine; Homo sapiens	2013	9			North America	United States	Florida						Javiana	I				Food and Drug Administration - Center for Food Safety and Applied Nutrition (US)		Javiana	D1	l,z28	1,5	Javiana	9	l,z28	1,5	24	17	Javiana	Lineage 3		13	12	17	16	13
SAL_BA5791AA	FLDOH-86	SAL_BA5791AA	SAL_EA5149AA_AS	PRJNA183848	SRP028812	SAMN03290531	SRS922210	2015-08-27	2015-04-24	Human	Human	Homo sapiens; Age: 40-49; stool	2012	8			North America	United States	Florida						Javiana (Predicted)	I				Food and Drug Administration - Center for Food Safety and Applied Nutrition (US)	serovar undetermined	Javiana	D1	l,z28	1,5	Javiana	9	l,z28	1,5	24	17	Javiana	Lineage 3		13	12	17	16	13
SAL_BA5793AA	FLDOH-78	SAL_BA5793AA	SAL_EA5150AA_AS	PRJNA183848	SRP028812	SAMN03290523	SRS922211	2015-08-27	2015-04-24	Human	Human	Age: 0-4; stool; Homo sapiens	2013	5			North America	United States	Florida						Javiana (Predicted)	I				Food and Drug Administration - Center for Food Safety and Applied Nutrition (US)	serovar undetermined	Javiana	B	l,z28	1,5		9,46	l,z28	1,5	24	17	Javiana	Lineage 3		13	12	17	16	13
SAL_BA5805AA	FLDOH-52	SAL_BA5805AA	SAL_EA5159AA_AS	PRJNA183848	SRP028812	SAMN03290497	SRS922193	2015-08-27	2015-04-24	Human	Human	Age: 50-59; stool; Homo sapiens	2012	5			North America	United States	Florida						Javiana (Predicted)	I				Food and Drug Administration - Center for Food Safety and Applied Nutrition (US)	serovar undetermined	Javiana	D1	l,z28	1,5	Javiana	9	l,z28	1,5	24	17	Javiana	Lineage 3		13	12	17	16	13
SAL_BA5809AA	FLDOH-94	SAL_BA5809AA	SAL_BA3658AA_AS	PRJNA183848	SRP028812	SAMN03290539	SRS922195	2015-08-27	2015-04-24	Human	Human	Age: 0-4; stool; Homo sapiens	2013	8			North America	United States	Florida						Javiana (Predicted)	I				Food and Drug Administration - Center for Food Safety and Applied Nutrition (US)	serovar undetermined	Javiana	D1	l,z28	1,5	Javiana	9	l,z28	1,5	24	17	Javiana	Lineage 3		13	12	17	16	13
SAL_BA5821AA	FLDOH-99	SAL_BA5821AA	SAL_EA1738AA_AS	PRJNA183848	SRP028812	SAMN03290544	SRS922185	2015-08-27	2015-04-24	Human	Human	Homo sapiens; Age: 50-59; stool	2014	5			North America	United States	Florida				30.17	-81.7	Javiana	I				Food and Drug Administration - Center for Food Safety and Applied Nutrition (US)		Javiana	D1	l,z28	1,5	Javiana	9	l,z28	1,5	24	17	Javiana	Lineage 3		13	12	17	16	13
SAL_BA5829AA	FLDOH-76	SAL_BA5829AA	SAL_EA5170AA_AS	PRJNA183848	SRP028812	SAMN03290521	SRS922177	2015-08-27	2015-04-24	Human	Human	Age: 60-69; stool; Homo sapiens	2012	8			North America	United States	Florida						Javiana	I				Food and Drug Administration - Center for Food Safety and Applied Nutrition (US)		Javiana	D1	l,z28	1,5	Javiana	9	l,z28	1,5	24	17	Javiana	Lineage 3		13	12	17	16	13
SAL_BA5831AA	FLDOH-101	SAL_BA5831AA	SAL_EA5171AA_AS	PRJNA183848	SRP028812	SAMN03290546	SRS922178	2015-08-27	2015-04-24	Human	Human	Age: 10-19; stool; Homo sapiens	2014	4			North America	United States	Florida						Javiana	I				Food and Drug Administration - Center for Food Safety and Applied Nutrition (US)		Javiana	B	l,z28	1,5	Javiana	9	l,z28	1,5	24	17	Javiana	Lineage 3		13	12	17	16	13
SAL_BA5855AA	FLDOH-88	SAL_BA5855AA	SAL_EA5186AA_AS	PRJNA183848	SRP028812	SAMN03290533	SRS922169	2015-08-27	2015-04-24	Human	Human	Age: 0-4; stool; Homo sapiens	2012	9			North America	United States	Florida						Javiana (Predicted)	I				Food and Drug Administration - Center for Food Safety and Applied Nutrition (US)	serovar undetermined	Javiana	D1	l,z28	1,5	Javiana	9	l,z28	1,5	24	17	Javiana	Lineage 3		13	12	17	16	13
SAL_BA5857AA	FLDOH-100	SAL_BA5857AA	SAL_JA0578AA_AS	PRJNA183848	SRP028812	SAMN03290545	SRS922170	2015-08-27	2015-04-24	Human	Human	Age: 60-69; stool; Homo sapiens					North America	United States	Florida						Javiana	I				Food and Drug Administration - Center for Food Safety and Applied Nutrition (US)		Javiana	D1	l,z28	1,5	Javiana	9	l,z28	1,5	24	17	Javiana	Lineage 3		13	12	17	16	13
SAL_BA5869AA	FLDOH-92	SAL_BA5869AA	SAL_JA0579AA_AS	PRJNA183848	SRP028812	SAMN03290537	SRS922156	2015-08-27	2015-04-24	Human	Human	Age: 0-4; stool; Homo sapiens	2013	8			North America	United States	Florida						Javiana	I				Food and Drug Administration - Center for Food Safety and Applied Nutrition (US)		Javiana	D1	l,z28	1,5	Javiana	9	l,z28	1,5	24	17	Javiana	Lineage 3		13	12	17	16	13
SAL_BA5878AA	FLDOH-56	SAL_BA5878AA	SAL_JA0580AA_AS	PRJNA183848	SRP028812	SAMN03290501	SRS922145	2015-08-27	2015-04-24	Human	Human	Homo sapiens; stool	2013	9			North America	United States	Florida						Javiana	I				Food and Drug Administration - Center for Food Safety and Applied Nutrition (US)		Javiana	D1	l,z28	1,5	Javiana	9	l,z28	1,5	24	17	Javiana	Lineage 3		13	12	17	16	13
SAL_BA5881AA	FLDOH-72	SAL_BA5881AA	SAL_BA3456AA_AS	PRJNA183848	SRP028812	SAMN03290517	SRS922146	2015-08-27	2015-04-24	Human	Human	Age: 50-59; stool; Homo sapiens	2012	8			North America	United States	Florida						Javiana	I				Food and Drug Administration - Center for Food Safety and Applied Nutrition (US)		Javiana	D1	l,z28	1,5	Javiana	9	l,z28	1,5	24	17	Javiana	Lineage 3		13	12	17	16	13
SAL_BA5893AA	FLDOH-95	SAL_BA5893AA	SAL_EA5209AA_AS	PRJNA183848	SRP028812	SAMN03290540	SRS922137	2015-08-27	2015-04-24	Human	Human	Homo sapiens; Age: 0-4; stool	2013	12			North America	United States	Florida						Javiana	I				Food and Drug Administration - Center for Food Safety and Applied Nutrition (US)		Javiana	D1	l,z28	1,5	Javiana	9	l,z28	1,5	24	17	Javiana	Lineage 3		13	12	17	16	13
SAL_BA5897AA	FLDOH-80	SAL_BA5897AA	SAL_EA5211AA_AS	PRJNA183848	SRP028812	SAMN03290525	SRS922139	2015-08-27	2015-04-24	Human	Human	Homo sapiens; Age: 0-4; stool	2012	8			North America	United States	Florida						Javiana (Predicted)	I				Food and Drug Administration - Center for Food Safety and Applied Nutrition (US)	serovar undetermined	Javiana	D1	l,z28	1,5	Javiana	9	l,z28	1,5	24	17	Javiana	Lineage 3		13	12	17	16	13
SAL_BA5907AA	FLDOH-87	SAL_BA5907AA	SAL_EA5214AA_AS	PRJNA183848	SRP028812	SAMN03290532	SRS922132	2015-08-27	2015-04-24	Human	Human	Age: 5-9; stool; Homo sapiens	2012	8			North America	United States	Florida						Javiana (Predicted)	I				Food and Drug Administration - Center for Food Safety and Applied Nutrition (US)	serovar undetermined	Javiana	B	l,z28	1,5	Javiana	9	l,z28	1,5	24	17	Javiana	Lineage 3		13	12	17	16	13
SAL_BA5911AA	FLDOH-85	SAL_BA5911AA	SAL_EA5215AA_AS	PRJNA183848	SRP028812	SAMN03290530	SRS922134	2015-08-27	2015-04-24	Human	Human	Age: 70-79; stool; Homo sapiens	2012	8			North America	United States	Florida						Javiana	I				Food and Drug Administration - Center for Food Safety and Applied Nutrition (US)		Javiana	D1	l,z28	1,5	Javiana	9	l,z28	1,5	24	17	Javiana	Lineage 3		13	12	17	16	13
SAL_BA5913AA	FLDOH-75	SAL_BA5913AA	SAL_EA5217AA_AS	PRJNA183848	SRP028812	SAMN03290520	SRS922135	2015-08-27	2015-04-24	Human	Human	Age: 0-4; stool; Homo sapiens	2012	8			North America	United States	Florida						Javiana (Predicted)	I				Food and Drug Administration - Center for Food Safety and Applied Nutrition (US)	serovar undetermined	Javiana	D1	l,z28	1,5	Javiana	9	l,z28	1,5	24	17	Javiana	Lineage 3		13	12	17	16	13
SAL_BA5926AA	FLDOH-97	SAL_BA5926AA	SAL_EA5222AA_AS	PRJNA183848	SRP028812	SAMN03290542	SRS922129	2015-08-27	2015-04-24	Human	Human	Age: 0-4; stool; Homo sapiens	2012	9			North America	United States	Florida						Javiana (Predicted)	I				Food and Drug Administration - Center for Food Safety and Applied Nutrition (US)	serovar undetermined	Javiana	D1	l,z28	1,5	Javiana	9	l,z28	1,5	24	17	Javiana	Lineage 3		13	12	17	16	13
SAL_BA5937AA	FLDOH-91	SAL_BA5937AA	SAL_IA6442AA_AS	PRJNA183848	SRP028812	SAMN03290536	SRS922115	2015-08-27	2015-04-24	Human	Human	Age: 40-49; stool; Homo sapiens	2012	11			North America	United States	Florida						Undetermined	I				FOOD AND DRUG ADMINISTRATION, CENTER FOR FOOD SAFETY AND APPLIED NUTRITION		Javiana	D1	l,z28	1,5	Javiana	9	l,z28	1,5	24	17	Javiana	Lineage 3		13	12	17	16	13
SAL_BA5945AA	FLDOH-74	SAL_BA5945AA	SAL_JA0604AA_AS	PRJNA183848	SRP028812	SAMN03290519	SRS922108	2015-08-27	2015-04-24	Human	Human	Age: 0-4; stool; Homo sapiens	2012	11			North America	United States	Florida						Javiana (Predicted)	I				Food and Drug Administration - Center for Food Safety and Applied Nutrition (US)	serovar undetermined	Javiana	D1	l,z28	1,5	Javiana	9	l,z28	1,5	24	17	Javiana	Lineage 3		13	12	17	16	13
SAL_BA5952AA	FLDOH-58	SAL_BA5952AA	SAL_EA5232AA_AS	PRJNA183848	SRP028812	SAMN03290503	SRS922107	2015-08-27	2015-04-24	Human	Human	Homo sapiens; Age: 0-4; stool	2012	9			North America	United States	Florida						Javiana (Predicted)	I				Food and Drug Administration - Center for Food Safety and Applied Nutrition (US)	serovar undetermined	Javiana	D1	l,z28	1,5	Javiana	9	l,z28	1,5	24	17	Javiana	Lineage 3		13	12	17	16	13
SAL_BA5958AA	FLDOH-64	SAL_BA5958AA	SAL_EA5235AA_AS	PRJNA183848	SRP028812	SAMN03290509	SRS922103	2015-08-27	2015-04-24	Human	Human	Homo sapiens; Age: 0-4; urine	2013	9			North America	United States	Florida						Undetermined	I				FDA Center for Food Safety and Applied Nutrition		Javiana	D1	l,z28	1,5	Javiana	9	l,z28	1,5	24	17	Javiana	Lineage 3		13	12	17	16	13
SAL_BA5976AA	FLDOH-63	SAL_BA5976AA	SAL_EA5236AA_AS	PRJNA183848	SRP028812	SAMN03290508	SRS922062	2015-08-27	2015-04-24	Human	Human	Age: 30-39; stool; Homo sapiens	2013	8			North America	United States	Florida						Javiana	I				Food and Drug Administration - Center for Food Safety and Applied Nutrition (US)		Javiana	D1	l,z28	1,5		9,46	l,z28	1,5	24	17	Javiana	Lineage 3		13	12	17	16	13
SAL_BA5980AA	FLDOH-89	SAL_BA5980AA	SAL_EA5241AA_AS	PRJNA183848	SRP028812	SAMN03290534	SRS922069	2015-08-27	2015-04-24	Human	Human	Age: 0-4; stool; Homo sapiens	2012	10			North America	United States	Florida						Javiana (Predicted)	I				Food and Drug Administration - Center for Food Safety and Applied Nutrition (US)	serovar undetermined	Javiana	D1	l,z28	1,5	Javiana	9	l,z28	1,5	24	17	Javiana	Lineage 3		13	12	17	16	13
SAL_BA5984AA	FLDOH-62	SAL_BA5984AA	SAL_EA5239AA_AS	PRJNA183848	SRP028812	SAMN03290507	SRS922025	2015-08-27	2015-04-24	Human	Human	stool; Homo sapiens	2013	7			North America	United States	Florida						Javiana	I				Food and Drug Administration - Center for Food Safety and Applied Nutrition (US)		Javiana	D1	l,z28	1,5	Javiana	9	l,z28	1,5	24	17	Javiana	Lineage 3		13	12	17	16	13
SAL_BA5991AA	FLDOH-60	SAL_BA5991AA	SAL_EA5244AA_AS	PRJNA183848	SRP028812	SAMN03290505	SRS921914	2015-08-27	2015-04-24	Human	Human	Age: 0-4; stool; Homo sapiens	2013	7			North America	United States	Florida						Javiana	I				Food and Drug Administration - Center for Food Safety and Applied Nutrition (US)		Javiana	D1	l,z28	1,5	Javiana	9	l,z28	1,5	24	17	Javiana	Lineage 3		13	12	17	16	13
SAL_BA6001AA	FLDOH-81	SAL_BA6001AA	SAL_IA6445AA_AS	PRJNA183848	SRP028812	SAMN03290526	SRS921829	2015-08-27	2015-04-24	Human	Human	Age: 30-39; stool; Homo sapiens	2012	8			North America	United States	Florida						Javiana (Predicted)	I				Food and Drug Administration - Center for Food Safety and Applied Nutrition (US)	serovar undetermined	Javiana	D1	l,z28	1,5	Javiana	9	l,z28	1,5	24	17	Javiana	Lineage 3		13	12	17	16	13
SAL_BA6005AA	FLDOH-65	SAL_BA6005AA	SAL_BA4053AA_AS	PRJNA183848	SRP028812	SAMN03290510	SRS921821	2015-08-27	2015-04-24	Human	Human	Age: 0-4; stool; Homo sapiens	2014	2			North America	United States	Florida						Javiana	I				FOOD AND DRUG ADMINISTRATION, CENTER FOR FOOD SAFETY AND APPLIED NUTRITION		Javiana	D1	l,z28	1,5	Javiana	9	l,z28	1,5	24	17	Javiana	Lineage 3		13	12	17	16	13
SAL_BA6018AA	FLDOH-73	SAL_BA6018AA	SAL_EA5251AA_AS	PRJNA183848	SRP028812	SAMN03290518	SRS921622	2015-08-27	2015-04-24	Human	Human	Age: 5-9; stool; Homo sapiens	2012	9			North America	United States	Florida						Javiana	I				Food and Drug Administration - Center for Food Safety and Applied Nutrition (US)		Javiana	D1	l,z28	1,5	Javiana	9	l,z28	1,5	24	17	Javiana	Lineage 3		13	12	17	16	13
SAL_BA6030AA	FLDOH-54	SAL_BA6030AA	SAL_EA5259AA_AS	PRJNA183848	SRP028812	SAMN03290499	SRS921598	2015-08-27	2015-04-24	Human	Human	Age: 5-9; stool; Homo sapiens					North America	United States	Florida						Javiana (Predicted)	I				Food and Drug Administration - Center for Food Safety and Applied Nutrition (US)	serovar undetermined	Javiana	D1	l,z28	1,5	Javiana	9	l,z28	1,5	24	17	Javiana	Lineage 3		13	12	17	16	13
SAL_BA6041AA	FLDOH-79	SAL_BA6041AA	SAL_EA5262AA_AS	PRJNA183848	SRP028812	SAMN03290524	SRS921594	2015-08-27	2015-04-24	Human	Human	Age: 0-4; stool; Homo sapiens	2012	8			North America	United States	Florida						Undetermined	I				FOOD AND DRUG ADMINISTRATION, CENTER FOR FOOD SAFETY AND APPLIED NUTRITION		Javiana	D1	l,z28	1,5	Javiana	9	l,z28	1,5	24	17	Javiana	Lineage 3		13	12	17	16	13
SAL_BA6053AA	FLDOH-68	SAL_BA6053AA	SAL_EA5264AA_AS	PRJNA183848	SRP028812	SAMN03290513	SRS921585	2015-08-27	2015-04-24	Human	Human	Homo sapiens; Age: 50-59; stool					North America	United States	Florida						Javiana	I				Food and Drug Administration - Center for Food Safety and Applied Nutrition (US)		Javiana	D1	l,z28	1,5	Javiana	9	l,z28	1,5	24	17	Javiana	Lineage 3		13	12	17	16	13
SAL_BA6078AA	FLDOH-51	SAL_BA6078AA	SAL_IA6452AA_AS	PRJNA183848	SRP028812	SAMN03290496	SRS921576	2015-08-27	2015-04-24	Human	Human	Age: 80-89; urine; Homo sapiens	2012	5			North America	United States	Florida						Javiana (Predicted)	I				Food and Drug Administration - Center for Food Safety and Applied Nutrition (US)	serovar undetermined	Javiana	D1	l,z28	1,5	Javiana	9	l,z28	1,5	24	17	Javiana	Lineage 3		13	12	17	16	13
SAL_BA6082AA	FLDOH-70	SAL_BA6082AA	SAL_IA6453AA_AS	PRJNA183848	SRP028812	SAMN03290515	SRS921572	2015-08-27	2015-04-24	Human	Human	Homo sapiens; Age: 5-9; stool	2012	4			North America	United States	Florida						Javiana (Predicted)	I				Food and Drug Administration - Center for Food Safety and Applied Nutrition (US)	serovar undetermined	Javiana	D1	l,z28	1,5	Javiana	9	l,z28	1,5	24	17	Javiana	Lineage 3		13	12	17	16	13
SAL_BA6096AA	FLDOH-53	SAL_BA6096AA	SAL_EA5276AA_AS	PRJNA183848	SRP028812	SAMN03290498	SRS921562	2015-08-27	2015-04-24	Human	Human	Homo sapiens; Age: 0-4; blood					North America	United States	Florida						Undetermined	I				FDA Center for Food Safety and Applied Nutrition		Javiana	D1	l,z28	1,5	Javiana	9	l,z28	1,5	24	17	Javiana	Lineage 3		13	12	17	16	13
SAL_BA6104AA	FLDOH-93	SAL_BA6104AA	SAL_EA5279AA_AS	PRJNA183848	SRP028812	SAMN03290538	SRS921570	2015-08-27	2015-04-24	Human	Human	Homo sapiens; Age: 5-9; stool	2013	6			North America	United States	Florida						Javiana (Predicted)	I				Food and Drug Administration - Center for Food Safety and Applied Nutrition (US)	serovar undetermined	Javiana	D1	l,z28	1,5	Javiana	9	l,z28	1,5	24	17	Javiana	Lineage 3		13	12	17	16	13
SAL_BA6114AA	FLDOH-98	SAL_BA6114AA	SAL_EA5286AA_AS	PRJNA183848	SRP028812	SAMN03290543	SRS921554	2015-08-27	2015-04-24	Human	Human	Age: 0-4; stool; Homo sapiens	2012	10			North America	United States	Florida						Undetermined	I				FOOD AND DRUG ADMINISTRATION, CENTER FOR FOOD SAFETY AND APPLIED NUTRITION		Javiana	D1	l,z28	1,5	Javiana	9	l,z28	1,5	24	17	Javiana	Lineage 3		13	12	17	16	13
SAL_BA6124AA	FLDOH-59	SAL_BA6124AA	SAL_EA5287AA_AS	PRJNA183848	SRP028812	SAMN03290504	SRS921548	2015-08-27	2015-04-24	Human	Human	Age: 0-4; stool; Homo sapiens	2012	10			North America	United States	Florida						Undetermined	I				FOOD AND DRUG ADMINISTRATION, CENTER FOR FOOD SAFETY AND APPLIED NUTRITION		Javiana	D1	l,z28	1,5	Javiana	9	l,z28	1,5	24	17	Javiana	Lineage 3		13	12	17	16	13
SAL_BA6147AA	FLDOH-69	SAL_BA6147AA	SAL_EA5301AA_AS	PRJNA183848	SRP028812	SAMN03290514	SRS921539	2015-08-27	2015-04-24	Human	Human	Age: 0-4; stool; Homo sapiens	2012	9			North America	United States	Florida						Javiana	I				Food and Drug Administration - Center for Food Safety and Applied Nutrition (US)		Javiana	D1	l,z28	1,5	Javiana	9	l,z28	1,5	24	17	Javiana	Lineage 3		13	12	17	16	13
SAL_BA6309AA	FDA322048 6-1 C2	SAL_BA6309AA	SAL_EA5353AA_AS	PRJNA186035	SRP018785	SAMN02845637	SRS915070	2015-08-27	2015-04-20	Food	Plant	pepper powder	2005	3			Asia	China							Javiana	I				Food and Drug Administration - Center for Food Safety and Applied Nutrition (US)		Javiana	D1	l,z28	1,5	Javiana	9	l,z28	1,5	1547	17	Javiana	Lineage 3		60	12	17	16	13
SAL_BA6406AA	FDA321962 1-2 C1	SAL_BA6406AA	SAL_EA5405AA_AS	PRJNA186035	SRP018785	SAMN02845635	SRS915020	2015-08-27	2015-04-20	Food	Plant	pepper powder	2005	3			Asia	China							Kottbus	I				Food and Drug Administration - Center for Food Safety and Applied Nutrition (US)		Javiana	D1	l,z28	1,5	Javiana	9	l,z28	1,5	1547	17	Javiana	Lineage 3		60	12	17	16	13
SAL_BA6547AA	FDA475710 5-1	SAL_BA6547AA	SAL_EA5462AA_AS	PRJNA186035	SRP018785	SAMN02846145	SRS913576	2015-08-27	2015-04-18	Environment	Plant	fresh basil	2008	6			North America	Mexico												Food and Drug Administration - Center for Food Safety and Applied Nutrition (US)		Javiana	D1	l,z28	l,z13,z28		9	l,z28	-	24	17	Javiana	Lineage 3		13	12	17	16	13
SAL_BA6708AA	FDA98147 2-1	SAL_BA6708AA	SAL_EA5551AA_AS	PRJNA186035	SRP018785	SAMN02847799	SRS909805	2015-08-27	2015-04-14	Environment	Plant	fresh roma tomatoes	2007	11			North America	Mexico							Javiana	I				Food and Drug Administration - Center for Food Safety and Applied Nutrition (US)		Javiana	D1	l,z28	1,5	Javiana	9	l,z28	1,5	24	17	Javiana	Lineage 3		13	12	17	16	13
SAL_BA6876AA	FDA98147 2-9	SAL_BA6876AA	SAL_EA5614AA_AS	PRJNA186035	SRP018785	SAMN02847800	SRS909672	2015-08-27	2015-04-14	Environment	Plant	fresh roma tomatoes	2007	11			North America	Mexico							Javiana	I				Food and Drug Administration - Center for Food Safety and Applied Nutrition (US)		Javiana	D1	l,z28	1,5	Javiana	9	l,z28	1,5	24	17	Javiana	Lineage 3		13	12	17	16	13
SAL_BA6919AA	FDA475710 1-1	SAL_BA6919AA	SAL_IA7453AA_AS	PRJNA186035	SRP018785	SAMN02846143	SRS909615	2015-08-27	2015-04-14	Environment	Plant	fresh basil	2008	6			North America	Mexico												Food and Drug Administration - Center for Food Safety and Applied Nutrition (US)		Javiana	D1	l,z28	l,z13,z28		9	l,z28	-	24	17	Javiana	Lineage 3		13	12	17	16	13
SAL_BA6968AA	FDA475710 2-1	SAL_BA6968AA	SAL_BA5056AA_AS	PRJNA186035	SRP018785	SAMN02846144	SRS909583	2015-08-27	2015-04-14	Environment	Plant	fresh basil	2008	6			North America	Mexico												Food and Drug Administration - Center for Food Safety and Applied Nutrition (US)		Javiana	D1	l,z28	l,z13,z28		9	l,z28	-	24	17	Javiana	Lineage 3		13	12	17	16	13
SAL_BA7416AA	2015K-0189	SAL_BA7416AA	SAL_EA5853AA_AS	PRJNA230403	SRP040281	SAMN03469744	SRS907153	2015-08-27	2015-04-13	Human	Human	Age: 50-59; stool	2014	7			North America	United States							Javiana (Predicted)					Centers for Disease Control and Prevention - PulseNet		Javiana	D1	l,z28	1,5	Javiana	9	l,z28	1,5	24	17	Javiana	Lineage 3		13	12	17	16	13
SAL_BA7417AA	2015K-0188	SAL_BA7417AA	SAL_EA5854AA_AS	PRJNA230403	SRP040281	SAMN03469745	SRS907151	2015-08-27	2015-04-13	Human	Human	Age: 10-19; stool	2013	8			North America	United States							Javiana (Predicted)					PulseNet Next Generation Subtyping Methods Unit		Javiana	D1	l,z28	1,5	Javiana	9	l,z28	1,5	24	17	Javiana	Lineage 3		13	12	17	16	13
SAL_BA7574AA	5368	SAL_BA7574AA	SAL_EA5936AA_AS	PRJNA248792	SRP042645	SAMN03480315	SRS906925	2015-08-27	2015-04-13	Human	Human	Homo sapiens; human	2014	4			Europe	United Kingdom	England							I				Public Health England - Gastrointestinal Bacteria Reference Unit		Javiana	D1	l,z28	1,5	Javiana	9	l,z28	1,5	371	17	Javiana	Lineage 3		13	12	17	16	117
SAL_BA8168AA	83680	SAL_BA8168AA	SAL_EA6118AA_AS	PRJNA248792	SRP042645	SAMN03480020	SRS906682	2015-08-27	2015-04-13	Human	Human	Homo sapiens; human	2014	9			Europe	United Kingdom	England	Midlands and East of England					Panama	I				Public Health England - Gastrointestinal Bacteria Reference Unit		Panama	D1	l,z28	1,5	Javiana	9	l,z28	1,5	2494	17	Javiana	Lineage 3		60	429	17	662	13
SAL_BA9256AA	26995	SAL_BA9256AA	SAL_EA6468AA_AS	PRJNA248792	SRP042645	SAMN03479531	SRS906029	2015-08-27	2015-04-13	Human	Human	Homo sapiens; human	2014	6			Europe	United Kingdom	England						Javiana	I				Public Health England - Gastrointestinal Bacteria Reference Unit		Javiana	D1	l,z28	1,5	Javiana	9	l,z28	1,5	24	17	Javiana	Lineage 3		13	12	17	16	13
SAL_BA9654AA	63710	SAL_BA9654AA	SAL_EA6603AA_AS	PRJNA248792	SRP042645	SAMN03479252	SRS905758	2015-08-27	2015-04-12	Human	Human	Homo sapiens; human	2014	10			Europe	United Kingdom	England						Javiana	I				Public Health England - Gastrointestinal Bacteria Reference Unit		Javiana	D1	l,z28	1,5	Javiana	9	l,z28	1,5	371	17	Javiana	Lineage 3		13	12	17	16	117
SAL_BB0670AA	PNUSAS052887	SAL_BB0670AA	SAL_VB2872AA_AS	PRJNA230403	SRP040281	SAMN10124304	SRS3818475	2019-11-18	2018-09-25	Food	Dairy	Mac and Cheese	2018	8			North America	United States												Centers for Disease Control and Prevention Enteric Diseases Laboratory Branch		Javiana	D1	l,z28	1,5	Javiana	9	l,z28	1,5	24	17	Javiana	Lineage 3		13	12	17	16	13
SAL_BB0671AA	PNUSAS052888	SAL_BB0671AA	SAL_VB2871AA_AS	PRJNA230403	SRP040281	SAMN10124303	SRS3818474	2019-11-18	2018-09-25	Food	Dairy	Cheese Sauce	2018	8			North America	United States												Centers for Disease Control and Prevention Enteric Diseases Laboratory Branch		Javiana	D1	l,z28	1,5	Javiana	9	l,z28	1,5	24	17	Javiana	Lineage 3		13	12	17	16	13
SAL_BB0729AA	PNUSAS053475	SAL_BB0729AA	SAL_VB2813AA_AS	PRJNA230403	SRP040281	SAMN10037079	SRS3766613	2019-11-18	2018-09-12				2018	8			North America	United States												Centers for Disease Control and Prevention Enteric Diseases Laboratory Branch		Javiana	D1	l,z28	1,5	Javiana	9	l,z28	1,5	24	17	Javiana	Lineage 3		13	12	17	16	13
SAL_BB0734AA	PNUSAS053474	SAL_BB0734AA	SAL_VB2808AA_AS	PRJNA230403	SRP040281	SAMN10037080	SRS3766593	2019-11-18	2018-09-12				2018	8			North America	United States												Centers for Disease Control and Prevention Enteric Diseases Laboratory Branch		Javiana	D1	l,z28	1,5	Javiana	9	l,z28	1,5	24	17	Javiana	Lineage 3		13	12	17	16	13
SAL_BB0778AA	PNUSAS045839	SAL_BB0778AA	SAL_VB2755AA_AS	PRJNA230403	SRP040281	SAMN09714897	SRS3594849	2019-11-18	2018-07-25	Human	Human	Age: 0-4	2018	1			North America	United States							Javiana	I				Centers for Disease Control and Prevention Enteric Diseases Laboratory Branch		Javiana	D1	l,z28	1,5	Javiana	9	l,z28	1,5	24	17	Javiana	Lineage 3		13	12	17	16	13
SAL_BB0787AA	PNUSAS044212	SAL_BB0787AA	SAL_VB2746AA_AS	PRJNA230403	SRP040281	SAMN09692508	SRS3562467	2019-11-18	2018-07-19	Human	Human	Age: 40-49; swab	2018	1			North America	United States							Javiana	I				Centers for Disease Control and Prevention Enteric Diseases Laboratory Branch		Javiana	D1	l,z28	1,5	Javiana	9	l,z28	1,5	24	17	Javiana	Lineage 3		13	12	17	16	13
SAL_BB0837AA	PNUSAS037569	SAL_BB0837AA	SAL_VB2686AA_AS	PRJNA230403	SRP040281	SAMN08832520	SRS3114311	2019-11-18	2018-04-02	Environment	Plant	Kratom	2018	2			North America	United States												Centers for Disease Control and Prevention Enteric Diseases Laboratory Branch		Javiana	D1	l,z28	1,5	Javiana	9	l,z28	1,5	1547	17	Javiana	Lineage 3		60	12	17	16	13
SAL_BB0839AA	PNUSAS037642	SAL_BB0839AA	SAL_VB2684AA_AS	PRJNA230403	SRP040281	SAMN08832530	SRS3114308	2019-11-18	2018-04-02	Human	Human	Age: 40-49; Peritoneal Fluid	2017	11			North America	United States							Javiana	I				Centers for Disease Control and Prevention Enteric Diseases Laboratory Branch		Javiana	D1	l,z28	1,5	Javiana	9	l,z28	1,5	24	17	Javiana	Lineage 3		13	12	17	16	13
SAL_BB0847AA	PNUSAS037647	SAL_BB0847AA	SAL_VB2676AA_AS	PRJNA230403	SRP040281	SAMN08832525	SRS3114298	2019-11-18	2018-04-02	Human	Human	Age: 0-4; stool	2018	1			North America	United States							Javiana	I				Centers for Disease Control and Prevention Enteric Diseases Laboratory Branch		Javiana	D1	l,z28	1,5	Javiana	9	l,z28	1,5	24	17	Javiana	Lineage 3		13	12	17	16	13
SAL_BB0848AA	PNUSAS037646	SAL_BB0848AA	SAL_VB2675AA_AS	PRJNA230403	SRP040281	SAMN08832526	SRS3114297	2019-11-18	2018-04-02	Human	Human	Age: 50-59; stool	2018	1			North America	United States							Javiana	I				Centers for Disease Control and Prevention Enteric Diseases Laboratory Branch		Javiana	D1	l,z28	1,5	Javiana	9	l,z28	1,5	24	17	Javiana	Lineage 3		13	12	17	16	13
SAL_BB1816AA	1090801153	SAL_BB1816AA	SAL_VB5782AA_AS	PRJEB39546	ERP123079	SAMEA7115474	ERS4876019	2019-11-24	2019-11-24	Food	ND/Others		2008				Europe	Netherlands							Javiana					M. Achtman	X. Huijsden (RIVM)	Javiana	D1	l,z28	1,5	Javiana	9	l,z28	1,5	1547	17	Javiana	Lineage 3		60	12	17	16	13
SAL_BB1822AA	1090800157	SAL_BB1822AA	SAL_VB5776AA_AS	PRJEB39546	ERP123079	SAMEA7114394	ERS4874940	2019-11-24	2019-11-24	Human	Human		2008				Europe	Netherlands							Javiana					M. Achtman	X. Huijsden (RIVM)	Javiana	D1	l,z28	1,5	Javiana	9	l,z28	1,5	24	17	Javiana	Lineage 3		13	12	17	16	13
SAL_BB2229AA	SMG-19-2082	SAL_BB2229AA	SAL_VB8095AA_AS					2019-11-29	2019-11-29								Europe	United Kingdom	Scotland											D. Brown (Scotland)		Javiana	D1	l,z28	1,5	Javiana	9	l,z28	1,5	1547	17	Javiana	Lineage 3		60	12	17	16	13
SAL_BB2644AA	841359	SAL_BB2644AA	SAL_VB8757AA_AS	PRJNA248792	SRP042645	SAMN13354153	SRS5706924	2019-11-30	2019-11-23	Human	Human	Homo sapiens; human	2019	11			Europe	United Kingdom							Javiana	I				Public Health England		Javiana	D1	l,z28	1,5	Javiana	9	l,z28	1,5	371	17	Javiana	Lineage 3		13	12	17	16	117
SAL_BB2894AA	839916	SAL_BB2894AA	SAL_VB9717AA_AS	PRJNA248792	SRP042645	SAMN13332188	SRS5687420	2019-12-01	2019-11-20	Human	Human	Homo sapiens; human	2019	11			Europe	United Kingdom							Javiana	I				Public Health England		Javiana	D1	l,z28	1,5	Javiana	9	l,z28	1,5	371	17	Javiana	Lineage 3		13	12	17	16	117
SAL_BB2995AA	CFSAN096606	SAL_BB2995AA	SAL_VB9616AA_AS	PRJNA186035	SRP018785	SAMN13321510	SRS5679776	2019-12-01	2019-11-19	Environment	Soil/Dust	Environmental: Wet market (informal market)	2019	1			Asia	Cambodia												FDA Center for Food Safety and Applied Nutrition		Javiana	D1	l,z28	1,5	Javiana	9	l,z28	1,5	1547	17	Javiana	Lineage 3		60	12	17	16	13
SAL_BB3592AA	SMG-19-2137	SAL_BB3592AA	SAL_WB2746AA_AS					2019-12-09	2019-12-09								Europe	United Kingdom	Scotland											D. Brown (Scotland)		Javiana	D1	l,z28	1,5	Javiana	9	l,z28	1,5	1674	17	Javiana	Lineage 3		13	12	17	520	13
SAL_BB3829AA	PNUSAS120663	SAL_BB3829AA	SAL_WB3229AA_AS	PRJNA230403	SRP040281	SAMN13491042	SRS5766019	2019-12-10	2019-12-06	Human	Human	stool	2019	10			North America	United States												PulseNet Next Generation Subtyping Methods Unit		Javiana	D1	l,z28	1,5	Javiana	9	l,z28	1,5	24	17	Javiana	Lineage 3		13	12	17	16	13
SAL_BB3834AA	PNUSAS120666	SAL_BB3834AA	SAL_WB3224AA_AS	PRJNA230403	SRP040281	SAMN13491039	SRS5766014	2019-12-10	2019-12-06	Human	Human	stool	2019	11			North America	United States												PulseNet Next Generation Subtyping Methods Unit		Javiana	D1	l,z28	1,5	Javiana	9	l,z28	1,5	24	17	Javiana	Lineage 3		13	12	17	16	13
SAL_BB3836AA	PNUSAS120673	SAL_BB3836AA	SAL_WB3222AA_AS	PRJNA230403	SRP040281	SAMN13491034	SRS5766012	2019-12-10	2019-12-06	Human	Human	stool	2019	11			North America	United States												PulseNet Next Generation Subtyping Methods Unit		Javiana	D1	l,z28	1,5	Javiana	9	l,z28	1,5	24	17	Javiana	Lineage 3		13	12	17	16	13
SAL_BB4682AA	850892	SAL_BB4682AA	SAL_WB6421AA_AS	PRJNA248792	SRP042645	SAMN13564964	SRS5828187	2019-12-17	2019-12-15	Human	Human	Homo sapiens; human	2019	11			Europe	United Kingdom							Javiana	I				Public Health England		Javiana	D1	l,z28	1,5	Javiana	9	l,z28	1,5	7672	17	Javiana	Lineage 3		13	12	17	16	1197
SAL_BB4724AA	854178	SAL_BB4724AA	SAL_WB6379AA_AS	PRJNA248792	SRP042645	SAMN13564896	SRS5828141	2019-12-17	2019-12-15	Human	Human	Homo sapiens; human	2019	12			Europe	United Kingdom							Javiana	I				Public Health England		Javiana	D1	l,z28	1,5	Javiana	9	l,z28	1,5	1547	17	Javiana	Lineage 3		60	12	17	16	13
SAL_BB4855AA	02-02877	SAL_BB4855AA	SAL_WB8723AA_AS	PRJEB39546	ERP123079	SAMEA7113801	ERS4874348	2019-12-19	2019-12-19	Wild Animal	Reptile		2002				Europe	Germany							Javiana z28 neg.					M. Achtman	R. Helmuth (BfR Berlin)	Javiana	D1	l,z28	1,5	Javiana	9	l,z28	1,5	175	17	Javiana	Lineage 3		13	12	63	16	13
SAL_BB4869AA	MC_05-0837	SAL_BB4869AA	SAL_WB8709AA_AS	PRJEB39546	ERP123079	SAMEA7114805	ERS4875351	2019-12-19	2019-12-19	Human	Human	Faeces	2005				Europe	Ireland							Javiana					M. Achtman	M. Cormican (NSRL, Galway)	Javiana	D1	l,z28	1,5	Javiana	9	l,z28	1,5	24	17	Javiana	Lineage 3		13	12	17	16	13
SAL_BB4997AA	MC_08-1109	SAL_BB4997AA	SAL_WB8581AA_AS	PRJEB39546	ERP123079	SAMEA7113822	ERS4874369	2019-12-19	2019-12-19	Human	Human	Faeces	2008				Europe	Ireland							Javiana					M. Achtman	M. Cormican (NSRL, Galway)	Javiana	D1	l,z28	1,5	Javiana	9	l,z28	1,5	1547	17	Javiana	Lineage 3		60	12	17	16	13
SAL_BB5477AA	49-2592	SAL_BB5477AA	SAL_WB8090AA_AS	PRJEB39546	ERP123079	SAMEA7113919	ERS4874466	2019-12-19	2019-12-19	Human	Human		1949				North America	United States							Javiana					M. Achtman	S. Porwollik (SKCC)	Javiana	D1	l,z28	1,5	Javiana	9	l,z28	1,5	24	17	Javiana	Lineage 3		13	12	17	16	13
SAL_BB5492AA	MC_07-0752	SAL_BB5492AA	SAL_WB8075AA_AS	PRJEB39546	ERP123079	SAMEA7114924	ERS4875469	2019-12-19	2019-12-19	Human	Human	Faeces	2007				Europe	Ireland												M. Achtman	M. Cormican (NSRL, Galway)	Javiana	D1	l,z28	1,5	Javiana	9	l,z28	1,5	1547	17	Javiana	Lineage 3		60	12	17	16	13
SAL_BB5949AA	MC_05-0768	SAL_BB5949AA	SAL_WB7618AA_AS	PRJEB39546	ERP123079	SAMEA7113357	ERS4873905	2019-12-19	2019-12-19	Human	Human	Faeces	2005				Europe	Ireland							Javiana					M. Achtman	M. Cormican (NSRL, Galway)	Javiana	D1	l,z28	1,5	Javiana	9	l,z28	1,5	24	17	Javiana	Lineage 3		13	12	17	16	13
SAL_BB6108AA	M15	SAL_BB6108AA	SAL_WB7459AA_AS	PRJEB39546	ERP123079	SAMEA7115074	ERS4875619	2019-12-19	2019-12-19				2002				North America	United States							Javiana					M. Achtman	L. Harrison (Univ of Pittsburgh)	Javiana	D1	l,z28	1,5	Javiana	9	l,z28	1,5	24	17	Javiana	Lineage 3		13	12	17	16	13
SAL_BB6109AA	M270	SAL_BB6109AA	SAL_WB7458AA_AS	PRJEB39546	ERP123079	SAMEA7113419	ERS4873966	2019-12-19	2019-12-19				2001				North America	United States							Javiana					M. Achtman	L. Harrison (Univ of Pittsburgh)	Javiana	D1	l,z28	1,5	Javiana	9	l,z28	1,5	24	17	Javiana	Lineage 3		13	12	17	16	13
SAL_BB6110AA	M224	SAL_BB6110AA	SAL_WB7457AA_AS	PRJEB39546	ERP123079	SAMEA7113421	ERS4873968	2019-12-19	2019-12-19				2001				North America	United States							Javiana					M. Achtman	L. Harrison (Univ of Pittsburgh)	Javiana	D1	l,z28	1,5	Javiana	9	l,z28	1,5	24	17	Javiana	Lineage 3		13	12	17	16	13
SAL_BB6180AA	SGSC4917	SAL_BB6180AA	SAL_WB7387AA_AS	PRJEB39546	ERP123079	SAMEA7115381	ERS4875926	2019-12-19	2019-12-19																Javiana					M. Achtman	S. Porwollik (SKCC)	Javiana	D1	l,z28	1,5	Javiana	9	l,z28	1,5	24	17	Javiana	Lineage 3		13	12	17	16	13
SAL_BB6377AA	FDA1129517-C001-001	SAL_BB6377AA	SAL_WB9867AA_AS	PRJNA186035	SRP018785	SAMN13663212	SRS5873008	2019-12-24	2019-12-22	Aquatic Animal	Fish	Frozen Goby Fish	2019	11			Asia	Vietnam												FDA Center for Food Safety and Applied Nutrition		Javiana	D1	l,z28	1,5	Javiana	9	l,z28	1,5	1547	17	Javiana	Lineage 3		60	12	17	16	13
SAL_BB7664AA	U2582s	SAL_BB7664AA	SAL_XB3246AA_AS					2020-01-02	2020-01-02	Livestock	Swine	Caeca content (Sus scrofa domesticus)	2019	4	29		South America	Ecuador	Pichincha	Cant√≥n Quito	UIO				Javiana					UNIETAR	Prevalencia Cerdos	Javiana	D1	l,z28	1,5	Javiana	9	l,z28	1,5	1674	17	Javiana	Lineage 3		13	12	17	520	13
SAL_BB8326AA	MC_08-0964	SAL_BB8326AA	SAL_XB6489AA_AS	PRJEB39546	ERP123079	SAMEA7114149	ERS4874696	2020-01-09	2020-01-09	Human	Human	Faeces	2008				Europe	Ireland							Javiana					M. Achtman	M. Cormican (NSRL, Galway)	Javiana	D1	l,z28	1,5	Javiana	9	l,z28	1,5	24	17	Javiana	Lineage 3		13	12	17	16	13
SAL_BB8369AA	CE04.050	SAL_BB8369AA	SAL_XB6446AA_AS	PRJEB39546	ERP123079	SAMEA7114163	ERS4874710	2020-01-09	2020-01-09	Human	Human		2004				Asia	Taiwan							Victoria					M. Achtman	Chien-Shun Chiou (CDC, Taiwan)	Javiana	D1	l,z28	1,5	Javiana	9	l,z28	1,5	1547	17	Javiana	Lineage 3		60	12	17	16	13
SAL_BB8400AA	MC_08-0297	SAL_BB8400AA	SAL_XB6414AA_AS	PRJEB39546	ERP123079	SAMEA7115508	ERS4876053	2020-01-09	2020-01-09	Human	Human	Faeces	2008				Europe	Ireland							Javiana					M. Achtman	M. Cormican (NSRL, Galway)	Javiana	D1	l,z28	1,5	Javiana	9	l,z28	1,5	1674	17	Javiana	Lineage 3		13	12	17	520	13
SAL_BB8402AA	MC_08-0295	SAL_BB8402AA	SAL_XB6412AA_AS	PRJEB39546	ERP123079	SAMEA7115423	ERS4875968	2020-01-09	2020-01-09	Human	Human	Faeces	2008				Europe	Ireland							Javiana					M. Achtman	M. Cormican (NSRL, Galway)	Javiana	D1	l,z28	1,5	Javiana	9	l,z28	1,5	1674	17	Javiana	Lineage 3		13	12	17	520	13
SAL_BB8434AA	MC_08-0922	SAL_BB8434AA	SAL_XB6380AA_AS	PRJEB39546	ERP123079	SAMEA7113584	ERS4874131	2020-01-09	2020-01-09	Human	Human	Faeces	2008				Europe	Ireland							Javiana					M. Achtman	M. Cormican (NSRL, Galway)	Javiana	D1	l,z28	1,5	Javiana	9	l,z28	1,5	24	17	Javiana	Lineage 3		13	12	17	16	13
SAL_BB8709AA	SMG-20-55	SAL_BB8709AA	SAL_XB8312AA_AS					2020-01-13	2020-01-13								Europe	United Kingdom	Scotland											D. Brown (Scotland)		Javiana	D1	l,z28	1,5	Javiana	9	l,z28	1,5	24	17	Javiana	Lineage 3		13	12	17	16	13
SAL_CA0090AA	12154	SAL_CA0090AA	SAL_EA6665AA_AS	PRJNA248792	SRP042645	SAMN03479035	SRS905540	2015-08-27	2015-04-12	Human	Human	Homo sapiens; human	2014	5			Europe	United Kingdom	England						Javiana	I				Gastrointestinal Bacteria Reference Unit, Public Health England		Javiana	D1	l,z28	1,5	Javiana	9	l,z28	1,5	24	17	Javiana	Lineage 3		13	12	17	16	13
SAL_CA0098AA	85737	SAL_CA0098AA	SAL_EA6666AA_AS	PRJNA248792	SRP042645	SAMN03479031	SRS905544	2015-08-27	2015-04-12	Human	Human	Homo sapiens; human	2015	2			Europe	United Kingdom	England						Javiana	I				Gastrointestinal Bacteria Reference Unit, Public Health England		Javiana	D1	l,z28	1,5	Javiana	9	l,z28	1,5	24	17	Javiana	Lineage 3		13	12	17	16	13
SAL_CA0376AA	31925	SAL_CA0376AA	SAL_EA6707AA_AS	PRJNA248792	SRP042645	SAMN03478895	SRS905521	2015-08-27	2015-04-12	Human	Human	Homo sapiens; human	2014	7			Europe	United Kingdom	England						Javiana	I				Gastrointestinal Bacteria Reference Unit, Public Health England		Javiana	D1	l,z28	1,5	Javiana	9	l,z28	1,5	1674	17	Javiana	Lineage 3		13	12	17	520	13
SAL_CA0857AA	CFSAN001992	SAL_CA0857AA	SAL_KA3383AA_AS	PRJNA183458	SRP017708	SAMN01832085	SRS382234	2015-08-27	2013-03-20	Human	Human	Homo sapiens; clinical	2012	10			North America	United States	Arizona						Javiana	I				Food and Drug Administration - Center for Food Safety and Applied Nutrition (US)		Javiana	D1	l,z28	1,5	Javiana	9	l,z28	1,5	24	17	Javiana	Lineage 3		13	12	17	16	13
SAL_CA2136AA	83589	SAL_CA2136AA	SAL_EA7277AA_AS	PRJNA248792	SRP042645	SAMN03477925	SRS904538	2015-08-27	2015-04-12	Human	Human	Homo sapiens; human	2015	1			Europe	United Kingdom	England	London				0	Javiana	I				Gastrointestinal Bacteria Reference Unit, Public Health England		Javiana	D1	l,z28	1,5	Javiana	9	l,z28	1,5	1547	17	Javiana	Lineage 3		60	12	17	16	13
SAL_CA2451AA	23506	SAL_CA2451AA	SAL_EA7383AA_AS	PRJNA248792	SRP042645	SAMN03477610	SRS904127	2015-08-27	2015-04-12	Human	Human	Homo sapiens; human	2014	6			Europe	United Kingdom	England	Midlands and East of England					Javiana	I				Public Health England - Gastrointestinal Bacteria Reference Unit		Javiana	D1	l,z28	1,5	Javiana	9	l,z28	1,5	24	17	Javiana	Lineage 3		13	12	17	16	13
SAL_CA2499AA	63048	SAL_CA2499AA	SAL_EA7406AA_AS	PRJNA248792	SRP042645	SAMN03477562	SRS904085	2015-08-27	2015-04-12	Human	Human	Homo sapiens; human	2014	10			Europe	United Kingdom	England						Javiana (Predicted)	I				Public Health England - Gastrointestinal Bacteria Reference Unit		Javiana	D1	l,z28	1,5	Javiana	9	l,z28	1,5	1547	17	Javiana	Lineage 3		60	12	17	16	13
SAL_CA2599AA	5951	SAL_CA2599AA	SAL_EA7438AA_AS	PRJNA248792	SRP042645	SAMN03477462	SRS904001	2015-08-27	2015-04-12	Human	Human	Homo sapiens; human	2014	4			Europe	United Kingdom	England						Javiana (Predicted)	I				Public Health England - Gastrointestinal Bacteria Reference Unit		Javiana	D1	l,z28	1,5	Javiana	9	l,z28	1,5	1547	17	Javiana	Lineage 3		60	12	17	16	13
SAL_CA2622AA	90512	SAL_CA2622AA	SAL_EA7448AA_AS	PRJNA248792	SRP042645	SAMN03477439	SRS903967	2015-08-27	2015-04-12	Human	Human	Homo sapiens; human	2015	2			Europe	United Kingdom	England						Javiana	I				Gastrointestinal Bacteria Reference Unit, Public Health England		Javiana	D1	l,z28	1,5	Javiana	9	l,z28	1,5	24	17	Javiana	Lineage 3		13	12	17	16	13
SAL_CA2625AA	86881	SAL_CA2625AA	SAL_EA7449AA_AS	PRJNA248792	SRP042645	SAMN03477436	SRS903970	2015-08-27	2015-04-12	Human	Human	Homo sapiens; human	2015	2			Europe	United Kingdom	England						Javiana	I				Gastrointestinal Bacteria Reference Unit, Public Health England		Javiana	D1	l,z28	1,5	Javiana	9	l,z28	1,5	1674	17	Javiana	Lineage 3		13	12	17	520	13
SAL_CA2988AA	75930	SAL_CA2988AA	SAL_CA0619AA_AS	PRJNA248792	SRP042645	SAMN03477061	SRS903596	2015-08-27	2015-04-12	Human	Human	Homo sapiens; human	2014	9			Europe	United Kingdom	England						Javiana (Predicted)	I				Public Health England - Gastrointestinal Bacteria Reference Unit		Javiana	D1	l,z28	1,5	Javiana	9	l,z28	1,5	1547	17	Javiana	Lineage 3		60	12	17	16	13
SAL_CA3022AA	37092	SAL_CA3022AA	SAL_BA9528AA_AS	PRJNA248792	SRP042645	SAMN03477027	SRS903567	2015-08-27	2015-04-12	Human	Human	Homo sapiens; human	2014	8			Europe	United Kingdom	England	London				0	Javiana	I				Public Health England - Gastrointestinal Bacteria Reference Unit		Javiana	D1	l,z28	1,5	Javiana	9	l,z28	1,5	24	17	Javiana	Lineage 3		13	12	17	16	13
SAL_CA4188AA	27798	SAL_CA4188AA	SAL_EA7958AA_AS	PRJNA248792	SRP042645	SAMN03475861	SRS902388	2015-08-27	2015-04-12	Human	Human	Homo sapiens; human	2014	7			Europe	United Kingdom	England						Javiana	I				Public Health England - Gastrointestinal Bacteria Reference Unit		Javiana	D1	l,z28	1,5	Javiana	9	l,z28	1,5	24	17	Javiana	Lineage 3		13	12	17	16	13
SAL_CA4220AA	25170	SAL_CA4220AA	SAL_EA7964AA_AS	PRJNA248792	SRP042645	SAMN03475829	SRS902361	2015-08-27	2015-04-12	Food	ND/Others	food	2014	7			Europe	United Kingdom	England	London				0	Javiana	I				Gastrointestinal Bacteria Reference Unit, Public Health England		Javiana	D1	l,z28	1,5	Javiana	9	l,z28	1,5	24	17	Javiana	Lineage 3		13	12	17	16	13
SAL_CA4284AA	5864	SAL_CA4284AA	SAL_EA7990AA_AS	PRJNA248792	SRP042645	SAMN03475764	SRS902293	2015-08-27	2015-04-12	Human	Human	Homo sapiens; human	2014	4			Europe	United Kingdom	England						Javiana (Predicted)	I				Public Health England - Gastrointestinal Bacteria Reference Unit		Javiana	D1	l,z28	1,5	Javiana	9	l,z28	1,5	1547	17	Javiana	Lineage 3		60	12	17	16	13
SAL_CA4318AA	89898	SAL_CA4318AA	SAL_EA8001AA_AS	PRJNA248792	SRP042645	SAMN03475730	SRS902456	2015-08-27	2015-04-12	Human	Human	Homo sapiens; human	2015	2			Europe	United Kingdom	England	Midlands and East of England					Javiana	I				Public Health England - Gastrointestinal Bacteria Reference Unit		Javiana	D1	l,z28	1,5	Javiana	9	l,z28	1,5	1674	17	Javiana	Lineage 3		13	12	17	520	13
SAL_CA4333AA	89869	SAL_CA4333AA	SAL_IA9261AA_AS	PRJNA248792	SRP042645	SAMN03475715	SRS902262	2015-08-27	2015-04-12	Human	Human	Homo sapiens; human	2015	1			Europe	United Kingdom	England	London				0	Javiana	I				Gastrointestinal Bacteria Reference Unit, Public Health England		Javiana	D1	l,z28	1,5	Javiana	9	l,z28	1,5	1547	17	Javiana	Lineage 3		60	12	17	16	13
SAL_CA4467AA	6454	SAL_CA4467AA	SAL_EA8048AA_AS	PRJNA248792	SRP042645	SAMN03475575	SRS902036	2015-08-27	2015-04-12	Human	Human	Homo sapiens; human	2014	4			Europe	United Kingdom	England						Javiana (Predicted)	I				Public Health England - Gastrointestinal Bacteria Reference Unit		Javiana	D1	l,z28	1,5	Javiana	9	l,z28	1,5	1547	17	Javiana	Lineage 3		60	12	17	16	13
SAL_CA4827AA	25222	SAL_CA4827AA	SAL_EA8164AA_AS	PRJNA248792	SRP042645	SAMN03473975	SRS901888	2015-08-27	2015-04-12	Food	ND/Others	food	2014	7			Europe	United Kingdom	England	London				0	Javiana	I				Gastrointestinal Bacteria Reference Unit, Public Health England		Javiana	D1	l,z28	1,5		-	l,z28	1,5	24	17	Javiana	Lineage 3		13	12	17	16	13
SAL_CA5253AA	73638	SAL_CA5253AA	SAL_EA8309AA_AS	PRJNA248792	SRP042645	SAMN03469194	SRS900511	2015-08-27	2015-04-10	Human	Human	Homo sapiens; human	2014	12			Europe	United Kingdom	England						Javiana	I				Gastrointestinal Bacteria Reference Unit, Public Health England		Javiana	D1	l,z28	1,5	Javiana	9	l,z28	1,5	2623	17	Javiana	Lineage 3		13	12	17	16	13
SAL_CA5258AA	78630	SAL_CA5258AA	SAL_EA8312AA_AS	PRJNA248792	SRP042645	SAMN03469188	SRS900585	2015-08-27	2015-04-10	Human	Human	Homo sapiens; human	2014	12			Europe	United Kingdom	England						Javiana	I				Gastrointestinal Bacteria Reference Unit, Public Health England		Javiana	D1	l,z28	1,5	Javiana	9	l,z28	1,5	24	17	Javiana	Lineage 3		13	12	17	16	13
SAL_CA5307AA	73656	SAL_CA5307AA	SAL_EA8327AA_AS	PRJNA248792	SRP042645	SAMN03469138	SRS900468	2015-08-27	2015-04-10	Human	Human	Homo sapiens; human	2014	12			Europe	United Kingdom	England						Javiana	I				Gastrointestinal Bacteria Reference Unit, Public Health England		Javiana	D1	l,z28	1,5	Javiana	9	l,z28	1,5	1674	17	Javiana	Lineage 3		13	12	17	520	13
SAL_CA5602AA	78720	SAL_CA5602AA	SAL_BA5198AA_AS	PRJNA248792	SRP042645	SAMN03468760	SRS899434	2015-08-27	2015-04-10	Food	ND/Others	food	2014	12			Europe	United Kingdom	England						Javiana	I				Gastrointestinal Bacteria Reference Unit, Public Health England		Javiana	D1	l,z28	1,5	Javiana	9	l,z28	1,5	1674	17	Javiana	Lineage 3		13	12	17	520	13
SAL_CA5613AA	75676	SAL_CA5613AA	SAL_BA4377AA_AS	PRJNA248792	SRP042645	SAMN03468748	SRS899772	2015-08-27	2015-04-10	Human	Human	Homo sapiens; human	2014	12			Europe	United Kingdom	England	London				0	Javiana	I				Gastrointestinal Bacteria Reference Unit, Public Health England		Javiana	D1	l,z28	1,5	Javiana	9	l,z28	1,5	437	17	Javiana	Lineage 3		13	12	63	16	13
SAL_CA5723AA	73574	SAL_CA5723AA	SAL_EA8489AA_AS	PRJNA248792	SRP042645	SAMN03468565	SRS899145	2015-08-27	2015-04-10	Human	Human	Homo sapiens; human	2014	9			Europe	United Kingdom	England	Midlands and East of England					Javiana	I				Public Health England - Gastrointestinal Bacteria Reference Unit		Javiana	D1	l,z28	1,5	Javiana	9	l,z28	1,5	2394	17	Javiana	Lineage 3		13	12	17	16	13
SAL_CA5865AA	CFSAN001999	SAL_CA5865AA	SAL_JA4001AA_AS	PRJNA186035	SRP018785	SAMN02709155	SRS900954	2015-08-27	2015-04-09	Environment	Plant	cantaloupe	2012	9			North America	United States	Indiana						Javiana	I				Food and Drug Administration - Center for Food Safety and Applied Nutrition (US)		Javiana	D1	l,z28	1,5	Javiana	9	l,z28	1,5	24	17	Javiana	Lineage 3		13	12	17	16	13
SAL_CA6423AA	49753	SAL_CA6423AA	SAL_EA8710AA_AS	PRJNA248792	SRP042645	SAMN03466047	SRS898192	2015-08-27	2015-04-09	Human	Human	Homo sapiens; human	2014	9			Europe	United Kingdom	England							I				Public Health England - Gastrointestinal Bacteria Reference Unit		Javiana	D1	l,z28	1,5	Javiana	9	l,z28	1,5	371	17	Javiana	Lineage 3		13	12	17	16	117
SAL_CA6672AA	62538	SAL_CA6672AA	SAL_EA8785AA_AS	PRJNA248792	SRP042645	SAMN03465798	SRS897919	2015-08-27	2015-04-09	Human	Human	Homo sapiens; human	2014	10			Europe	United Kingdom	England	London						I				Public Health England - Gastrointestinal Bacteria Reference Unit		Javiana	D1	l,z28	1,5	Javiana	9	l,z28	1,5	371	17	Javiana	Lineage 3		13	12	17	16	117
SAL_CA6800AA	44749	SAL_CA6800AA	SAL_EA8813AA_AS	PRJNA248792	SRP042645	SAMN03465663	SRS897808	2015-08-27	2015-04-09	Human	Human	Homo sapiens; human	2014	9			Europe	United Kingdom	England						Javiana (Predicted)	I				Public Health England - Gastrointestinal Bacteria Reference Unit		Javiana	D1	l,z28	1,5	Javiana	9	l,z28	1,5	1547	17	Javiana	Lineage 3		60	12	17	16	13
SAL_CA6825AA	44747	SAL_CA6825AA	SAL_EA8821AA_AS	PRJNA248792	SRP042645	SAMN03465638	SRS898019	2015-08-27	2015-04-09	Human	Human	Homo sapiens; human	2014	9			Europe	United Kingdom	England	Midlands and East of England					Javiana	I				Public Health England - Gastrointestinal Bacteria Reference Unit		Javiana	D1	l,z28	1,5	Javiana	9	l,z28	1,5	1674	17	Javiana	Lineage 3		13	12	17	520	13
SAL_CA6866AA	2015K-0185	SAL_CA6866AA	SAL_EA8837AA_AS	PRJNA230403	SRP040281	SAMN03460319	SRS893836	2015-08-27	2015-04-06	Human	Human	Age: 0-4; stool	2014	8			North America	United States							Javiana					Centers for Disease Control and Prevention - PulseNet		Javiana	D1	l,z28	1,5	Javiana	9	l,z28	1,5	24	17	Javiana	Lineage 3		13	12	17	16	13
SAL_CA6867AA	2015K-0184	SAL_CA6867AA	SAL_EA8839AA_AS	PRJNA230403	SRP040281	SAMN03460318	SRS893837	2015-08-27	2015-04-06	Human	Human	stool	2014	8			North America	United States							Javiana					PulseNet Next Generation Subtyping Methods Unit		Javiana	D1	l,z28	1,5	Javiana	9	l,z28	1,5	24	17	Javiana	Lineage 3		13	12	17	16	13
SAL_CA7053AA	VA-WGS-00369	SAL_CA7053AA	SAL_EA8927AA_AS	PRJNA219491	SRP033708	SAMN03112895	SRS888877	2015-08-27	2015-03-30	Wild Animal	Avian	seagull	2012	7			North America	United States	Virginia						Javiana	I				Food and Drug Administration - Center for Food Safety and Applied Nutrition (US)		Javiana	D1	l,z28	1,5	Javiana	9	l,z28	1,5	24	17	Javiana	Lineage 3		13	12	17	16	13
SAL_CA7072AA	FDA374401 1-1	SAL_CA7072AA	SAL_EA8936AA_AS	PRJNA186035	SRP018785	SAMN02845787	SRS888859	2015-08-27	2015-03-30	ND	ND/Others	Frz Baby Mullet	2006	4			Asia	Vietnam							Javiana	I				Food and Drug Administration - Center for Food Safety and Applied Nutrition (US)		Javiana	D1	l,z28	1,5	Javiana	9	l,z28	1,5	1547	17	Javiana	Lineage 3		60	12	17	16	13
SAL_CA7249AA	FDA493680 1-1	SAL_CA7249AA	SAL_EA9063AA_AS	PRJNA186035	SRP018785	SAMN02846253	SRS876470	2015-08-27	2015-03-19	Food	Fish	fish, fried with chilli pepper	2008	10			North America	Mexico							Javiana	I				Food and Drug Administration - Center for Food Safety and Applied Nutrition (US)		Javiana	B	l,z28	1,5		-	l,z28	1,5	1674	17	Javiana	Lineage 3		13	12	17	520	13
SAL_CA7581AA	2015K-0056	SAL_CA7581AA	SAL_EA9287AA_AS	PRJNA230403	SRP040281	SAMN03382386	SRS861649	2015-08-27	2015-03-03								North America	United States							Javiana (Predicted)					Centers for Disease Control and Prevention - PulseNet		Javiana	D1	l,z28	1,5	Javiana	9	l,z28	1,5	24	17	Javiana	Lineage 3		13	12	17	16	13
SAL_CA7582AA	2015K-0025	SAL_CA7582AA	SAL_EA9289AA_AS	PRJNA230403	SRP040281	SAMN03382385	SRS861650	2015-08-27	2015-03-03								North America	United States							Javiana (Predicted)					PulseNet Next Generation Subtyping Methods Unit		Javiana	D1	l,z28	1,5	Javiana	9	l,z28	1,5	2664	17	Javiana	Lineage 3		13	12	17	691	13
SAL_CA7590AA	FDA568194 6-4	SAL_CA7590AA	SAL_BA4656AA_AS	PRJNA186035	SRP018785	SAMN02846604	SRS861077	2015-08-27	2015-03-03	Environment	Plant	black pepper, whole	2009	8			Asia	Vietnam							Urbana	I				Food and Drug Administration - Center for Food Safety and Applied Nutrition (US)		Javiana	D1	l,z28	1,5	Javiana	9	l,z28	1,5	24	17	Javiana	Lineage 3		13	12	17	16	13
SAL_CA7593AA	FDA542325 C2 2-1	SAL_CA7593AA	SAL_BA2590AA_AS	PRJNA186035	SRP018785	SAMN02846490	SRS861064	2015-08-27	2015-03-03	Environment	Plant	green onion	2009	8			North America	Mexico							Javiana	I				Food and Drug Administration - Center for Food Safety and Applied Nutrition (US)		Javiana	D1	l,z28	1,5	Javiana	9	l,z28	1,5	24	17	Javiana	Lineage 3		13	12	17	16	13
SAL_CA7594AA	FDA542325 C3 4-2	SAL_CA7594AA	SAL_EA9294AA_AS	PRJNA186035	SRP018785	SAMN02846491	SRS861063	2015-08-27	2015-03-03	Environment	Plant	green onion	2009	8			North America	Mexico							Javiana	I				Food and Drug Administration - Center for Food Safety and Applied Nutrition (US)		Javiana	D1	l,z28	1,5	Javiana	9	l,z28	1,5	24	17	Javiana	Lineage 3		13	12	17	16	13
SAL_CA7598AA	FDA563450 C2 4-2	SAL_CA7598AA	SAL_EA9299AA_AS	PRJNA186035	SRP018785	SAMN02846599	SRS861059	2015-08-27	2015-03-03	Environment	Plant	jalapeno pepper, fresh	2009	8			North America	Mexico							Javiana	I				Food and Drug Administration - Center for Food Safety and Applied Nutrition (US)		Javiana	D1	l,z28	1,5	Javiana	9	l,z28	1,5	24	17	Javiana	Lineage 3		13	12	17	16	13
SAL_CA7603AA	FDA542325 C4 1-2	SAL_CA7603AA	SAL_EA9300AA_AS	PRJNA186035	SRP018785	SAMN02846492	SRS861058	2015-08-27	2015-03-03	Environment	Plant	green onion	2009	8			North America	Mexico							Javiana	I				Food and Drug Administration - Center for Food Safety and Applied Nutrition (US)		Javiana	D1	l,z28	1,5	Javiana	9	l,z28	1,5	24	17	Javiana	Lineage 3		13	12	17	16	13
SAL_CA7607AA	FDA563450 C2 2-1	SAL_CA7607AA	SAL_EA9305AA_AS	PRJNA186035	SRP018785	SAMN02846598	SRS861052	2015-08-27	2015-03-03	Environment	Plant	jalapeno pepper, fresh	2009	8			North America	Mexico							Javiana	I				Food and Drug Administration - Center for Food Safety and Applied Nutrition (US)		Javiana	D1	l,z28	1,5	Javiana	9	l,z28	1,5	24	17	Javiana	Lineage 3		13	12	17	16	13
SAL_CA7608AA	FDA542325 C6 2-1	SAL_CA7608AA	SAL_EA9307AA_AS	PRJNA186035	SRP018785	SAMN02846493	SRS861054	2015-08-27	2015-03-03	Environment	Plant	green onion	2009	8			North America	Mexico							Javiana	I				Food and Drug Administration - Center for Food Safety and Applied Nutrition (US)		Javiana	D1	l,z28	1,5	Javiana	9	l,z28	1,5	24	17	Javiana	Lineage 3		13	12	17	16	13
SAL_CA7865AA	2015K-0063	SAL_CA7865AA	SAL_EA9448AA_AS	PRJNA230403	SRP040281	SAMN03353664	SRS851829	2015-08-27	2015-02-20	Human	Human	Age: 60-69; stool	2014	12			North America	United States							Javiana (Predicted)					Centers for Disease Control and Prevention - PulseNet		Javiana	D1	l,z28	1,5	Javiana	9	l,z28	1,5	24	17	Javiana	Lineage 3		13	12	17	16	13
SAL_CA7866AA	2015K-0059	SAL_CA7866AA	SAL_EA9449AA_AS	PRJNA230403	SRP040281	SAMN03353662	SRS851826	2015-08-27	2015-02-20								North America	United States							Javiana (Predicted)					PulseNet Next Generation Subtyping Methods Unit		Javiana	D1	l,z28	1,5	Javiana	9	l,z28	1,5	24	17	Javiana	Lineage 3		13	12	17	16	13
SAL_CA7867AA	2015K-0058	SAL_CA7867AA	SAL_BA3381AA_AS	PRJNA230403	SRP040281	SAMN03353661	SRS851827	2015-08-27	2015-02-20								North America	United States							Javiana (Predicted)					PulseNet Next Generation Subtyping Methods Unit		Javiana	D1	l,z28	1,5	Javiana	9	l,z28	1,5	24	17	Javiana	Lineage 3		13	12	17	16	13
SAL_CA7868AA	2015K-0057	SAL_CA7868AA	SAL_EA9450AA_AS	PRJNA230403	SRP040281	SAMN03353663	SRS851830	2015-08-27	2015-02-20								North America	United States							Javiana (Predicted)					PulseNet Next Generation Subtyping Methods Unit		Javiana	D1	l,z28	1,5	Javiana	9	l,z28	1,5	24	17	Javiana	Lineage 3		13	12	17	16	13
SAL_CA7869AA	2015K-0054	SAL_CA7869AA	SAL_BA4134AA_AS	PRJNA230403	SRP040281	SAMN03353665	SRS851831	2015-08-27	2015-02-20								North America	United States							Javiana (Predicted)					Centers for Disease Control and Prevention - PulseNet		Javiana	D1	l,z28	1,5	Javiana	9	l,z28	1,5	24	17	Javiana	Lineage 3		13	12	17	16	13
SAL_CA7874AA	2015K-0002	SAL_CA7874AA	SAL_EA9454AA_AS	PRJNA230403	SRP040281	SAMN03353655	SRS851824	2015-08-27	2015-02-20								North America	United States							Javiana (Predicted)					PulseNet Next Generation Subtyping Methods Unit		Javiana	D1	l,z28	1,5	Javiana	9	l,z28	1,5	24	17	Javiana	Lineage 3		13	12	17	16	13
SAL_CA7875AA	2015K-0001	SAL_CA7875AA	SAL_EA9455AA_AS	PRJNA230403	SRP040281	SAMN03353654	SRS851822	2015-08-27	2015-02-20								North America	United States							Javiana (Predicted)					PulseNet Next Generation Subtyping Methods Unit		Javiana	D1	l,z28	1,5	Javiana	9	l,z28	1,5	24	17	Javiana	Lineage 3		13	12	17	16	13
SAL_CA8123AA	PNUSAS000129	SAL_CA8123AA	SAL_EA9606AA_AS	PRJNA230403	SRP040281	SAMN03294828	SRS844915	2015-08-27	2015-02-12	Human	Human	Age: 5-9; stool	2014	12			North America	United States							Javiana (Predicted)					PulseNet Next Generation Subtyping Methods Unit		Javiana	D1	l,z28	1,5	Javiana	9	l,z28	1,5	24	17	Javiana	Lineage 3		13	12	17	16	13
SAL_CA8315AA	PNUSAS000135	SAL_CA8315AA	SAL_EA9740AA_AS	PRJNA230403	SRP040281	SAMN03292368	SRS834202	2015-08-27	2015-02-04	Human	Human	Age: 5-9; stool	2014	12			North America	United States							Javiana (Predicted)					PulseNet Next Generation Subtyping Methods Unit		Javiana	D1	l,z28	1,5	Javiana	9	l,z28	1,5	24	17	Javiana	Lineage 3		13	12	17	16	13
SAL_CA8320AA	PNUSAS000130	SAL_CA8320AA	SAL_EA9745AA_AS	PRJNA230403	SRP040281	SAMN03281182	SRS834195	2015-08-27	2015-02-04	Human	Human	Age: 5-9; stool	2014	12			North America	United States							Javiana					Centers for Disease Control and Prevention - PulseNet		Javiana	D1	l,z28	1,5	Javiana	9	l,z28	1,5	24	17	Javiana	Lineage 3		13	12	17	16	13
SAL_CA8593AA	2015K-0022	SAL_CA8593AA	SAL_BA4021AA_AS	PRJNA230403	SRP040281	SAMN03288307	SRS824984	2015-08-27	2015-01-22	Human	Human	Age: 5-9; stool	2014	11			North America	United States							Javiana					Centers for Disease Control and Prevention - PulseNet		Javiana	D1	l,z28	1,5	Javiana	9	l,z28	1,5	24	17	Javiana	Lineage 3		13	12	17	16	13
SAL_CA8594AA	2015K-0021	SAL_CA8594AA	SAL_EA9908AA_AS	PRJNA230403	SRP040281	SAMN03288306	SRS824982	2015-08-27	2015-01-22	Human	Human	Age: 50-59; stool	2014	11			North America	United States							Javiana					Centers for Disease Control and Prevention - PulseNet		Javiana	D1	l,z28	1,5	Javiana	9	l,z28	1,5	24	17	Javiana	Lineage 3		13	12	17	16	13
SAL_CA8595AA	2015K-0020	SAL_CA8595AA	SAL_EA9906AA_AS	PRJNA230403	SRP040281	SAMN03288305	SRS824981	2015-08-27	2015-01-22	Human	Human	Age: 5-9; stool	2014	12			North America	United States							Javiana					Centers for Disease Control and Prevention - PulseNet		Javiana	D1	l,z28	1,5	Javiana	9	l,z28	1,5	24	17	Javiana	Lineage 3		13	12	17	16	13
SAL_CA8596AA	2015K-0017	SAL_CA8596AA	SAL_EA9907AA_AS	PRJNA230403	SRP040281	SAMN03288304	SRS824983	2015-08-27	2015-01-22	Human	Human	Age: 5-9; stool	2014	11			North America	United States							Javiana					Centers for Disease Control and Prevention - PulseNet		Javiana	D1	l,z28	1,5	Javiana	9	l,z28	1,5	24	17	Javiana	Lineage 3		13	12	17	16	13
SAL_CA8597AA	2015K-0016	SAL_CA8597AA	SAL_EA9911AA_AS	PRJNA230403	SRP040281	SAMN03288303	SRS824979	2015-08-27	2015-01-22	Human	Human	Age: 30-39; stool	2014	11			North America	United States							Javiana					PulseNet Next Generation Subtyping Methods Unit		Javiana	D1	l,z28	1,5	Javiana	9	l,z28	1,5	24	17	Javiana	Lineage 3		13	12	17	16	13
SAL_CA8598AA	2015K-0015	SAL_CA8598AA	SAL_EA9909AA_AS	PRJNA230403	SRP040281	SAMN03288302	SRS824978	2015-08-27	2015-01-22	Human	Human	Age: 30-39; stool	2014	11			North America	United States							Javiana					PulseNet Next Generation Subtyping Methods Unit		Javiana	D1	l,z28	1,5	Javiana	9	l,z28	1,5	24	17	Javiana	Lineage 3		13	12	17	16	13
SAL_CA8755AA	PNUSAS000128	SAL_CA8755AA	SAL_FA0010AA_AS	PRJNA230403	SRP040281	SAMN03278351	SRS816978	2015-08-27	2015-01-13	Human	Human	Age: 70-79; stool	2014	11			North America	United States							Javiana (Predicted)					Centers for Disease Control and Prevention - PulseNet		Javiana	D1	l,z28	1,5	Javiana	9	l,z28	1,5	24	17	Javiana	Lineage 3		13	12	17	16	13
SAL_CA8793AA	AUCVM-1727	SAL_CA8793AA	SAL_FA0025AA_AS	PRJNA183848	SRP028812	SAMN03269319	SRS815566	2015-08-27	2015-01-12	Livestock	Equine	equine:foodon_03414849; animal; Equine; equine	1996	6			North America	United States							Javiana	I				Food and Drug Administration - Center for Food Safety and Applied Nutrition (US)		Javiana	D1	l,z28	1,5	Javiana	9	l,z28	1,5	24	17	Javiana	Lineage 3		13	12	17	16	13
SAL_CA8965AA	FLUFL-1045	SAL_CA8965AA	SAL_FA0143AA_AS	PRJNA183848	SRP028812	SAMN03259211	SRS810258	2015-08-27	2015-01-06	Environment	Water/River	pond water	2012	2			North America	United States	Georgia						Javiana (Predicted)					FDA Center for Food Safety and Applied Nutrition		Javiana	D1	l,z28	1,5	Javiana	9	l,z28	1,5	24	17	Javiana	Lineage 3		13	12	17	16	13
SAL_CA8981AA	FLUFL-1026	SAL_CA8981AA	SAL_FA0158AA_AS	PRJNA183848	SRP028812	SAMN03259206	SRS810242	2015-08-27	2015-01-06	Environment	Water/River	pond water	2012	2			North America	United States	Georgia						Javiana (Predicted)					Food and Drug Administration - Center for Food Safety and Applied Nutrition (US)		Javiana	D1	l,z28	1,5	Javiana	9	l,z28	1,5	24	17	Javiana	Lineage 3		13	12	17	16	13
SAL_CA9182AA	FLUFL-797	SAL_CA9182AA	SAL_BA3547AA_AS	PRJNA183848	SRP028812	SAMN03174590	SRS798499	2015-08-27	2014-12-19	Environment	Water/River	pond water	2011	10			North America	United States	Georgia						Javiana (Predicted)					FDA Center for Food Safety and Applied Nutrition		Javiana	D1	l,z28	1,5	Javiana	9	l,z28	1,5	24	17	Javiana	Lineage 3		13	12	17	16	13
SAL_CA9197AA	FDA337228	SAL_CA9197AA	SAL_FA0324AA_AS	PRJNA186035	SRP018785	SAMN02844223	SRS798485	2015-08-27	2014-12-19	Aquatic Animal	Fish	fish eggs	2005	6			South America	Guyana							Javiana	I				Food and Drug Administration - Center for Food Safety and Applied Nutrition (US)		Javiana	D1	l,z28	1,5	Javiana	9	l,z28	1,5	24	17	Javiana	Lineage 3		13	12	17	16	13
SAL_CA9207AA	PNUSAS000121	SAL_CA9207AA	SAL_BA4276AA_AS	PRJNA230403	SRP040281	SAMN03265501	SRS797888	2015-08-27	2014-12-18	Human	Human	Age: 70-79; urine	2014	11			North America	United States							Serotype Pending					PulseNet Next Generation Subtyping Methods Unit		Javiana	D1	l,z28	1,5	Javiana	9	l,z28	1,5	24	17	Javiana	Lineage 3		13	12	17	16	13
SAL_CA9334AA	FLUFL-814	SAL_CA9334AA	SAL_FA0408AA_AS	PRJNA183848	SRP028812	SAMN03174596	SRS790712	2015-08-27	2014-12-14	Environment	Water/River	pond water	2011	10			North America	United States	Georgia						Javiana (Predicted)					FDA Center for Food Safety and Applied Nutrition		Javiana	D1	l,z28	1,5	Javiana	9	l,z28	1,5	24	17	Javiana	Lineage 3		13	12	17	16	13
SAL_CA9451AA	FDA263045	SAL_CA9451AA	SAL_FA0499AA_AS	PRJNA186035	SRP018785	SAMN02843955	SRS783163	2015-08-27	2014-12-09	Environment	Plant	black pepper corns	2003	12			Africa	South Africa							Javiana (Predicted)					Food and Drug Administration - Center for Food Safety and Applied Nutrition (US)		Javiana	D1	l,z28	1,5	Javiana	9	l,z28	1,5	1547	17	Javiana	Lineage 3		60	12	17	16	13
SAL_CA9605AA	FLUFL-774	SAL_CA9605AA	SAL_FA0550AA_AS	PRJNA183848	SRP028812	SAMN03174585	SRS780202	2015-08-27	2014-12-05	Environment	Water/River	pond water	2011	10			North America	United States	Georgia						Javiana (Predicted)					FDA Center for Food Safety and Applied Nutrition		Javiana	D1	l,z28	1,5	Javiana	9	l,z28	1,5	24	17	Javiana	Lineage 3		13	12	17	16	13
SAL_CA9623AA	VA-WGS-00386	SAL_CA9623AA	SAL_FA0563AA_AS	PRJNA219491	SRP033708	SAMN03160760	SRS780179	2015-08-27	2014-12-05	Wild Animal	Avian	seagull	2012	5			North America	United States	Virginia						Javiana	I				Food and Drug Administration - Center for Food Safety and Applied Nutrition (US)		Javiana	D1	l,z28	1,5	Javiana	9	l,z28	1,5	24	17	Javiana	Lineage 3		13	12	17	16	13
SAL_CA9625AA	FNW19i80	SAL_CA9625AA	SAL_BA5338AA_AS	PRJNA186035	SRP018785	SAMN02678822	SRS780177	2015-08-27	2014-12-05	Environment	Plant	fresh husk tomatoes (tomatillo)	2013	11			North America	Mexico							Javiana	I				Food and Drug Administration - Center for Food Safety and Applied Nutrition (US)		Javiana	D1	l,z28	1,5	Javiana	9	l,z28	1,5	24	17	Javiana	Lineage 3		13	12	17	16	13
SAL_CA9638AA	FNW19i79	SAL_CA9638AA	SAL_FA0570AA_AS	PRJNA186035	SRP018785	SAMN02678821	SRS780163	2015-08-27	2014-12-05	Environment	Plant	papaya	2013	11			North America	Mexico							Javiana	I				Food and Drug Administration - Center for Food Safety and Applied Nutrition (US)		Javiana	D1	l,z28	1,5	Javiana	9	l,z28	1,5	24	17	Javiana	Lineage 3		13	12	17	16	13
SAL_CA9669AA	FDA655585 5-2	SAL_CA9669AA	SAL_FA0595AA_AS	PRJNA186035	SRP018785	SAMN02847122	SRS779674	2015-08-27	2014-12-04	Environment	Plant	cucumbers	2010	10			North America	Mexico							Rough -:L,Z13:-	I				Food and Drug Administration - Center for Food Safety and Applied Nutrition (US)		Javiana	D1	l,z28	1,5	Javiana	9	l,z28	1,5	24	17	Javiana	Lineage 3		13	12	17	16	13
SAL_CA9679AA	FDA655585 5-1	SAL_CA9679AA	SAL_FA0601AA_AS	PRJNA186035	SRP018785	SAMN02847121	SRS779585	2015-08-27	2014-12-04	Environment	Plant	cucumbers	2010	10			North America	Mexico							Rough:L,Z13:-	I				Food and Drug Administration - Center for Food Safety and Applied Nutrition (US)		Javiana	D1	l,z28	1,5	Javiana	9	l,z28	1,5	24	17	Javiana	Lineage 3		13	12	17	16	13
SAL_CA9688AA	FDA599708 c2 5-2	SAL_CA9688AA	SAL_FA0606AA_AS	PRJNA186035	SRP018785	SAMN02846758	SRS779570	2015-08-27	2014-12-04	Food	Plant	dark red spice powder	2010	12			North America	United States	California						Anatum	I				FDA/CFSAN		Javiana	D1	l,z28	1,5	Javiana	9	l,z28	1,5	1547	17	Javiana	Lineage 3		60	12	17	16	13
SAL_CA9793AA	FDA655273 c2 2-2	SAL_CA9793AA	SAL_FA0676AA_AS	PRJNA186035	SRP018785	SAMN02847103	SRS753576	2015-08-27	2014-11-26	Environment	Plant	cucumbers	2010	10			North America	Mexico							Javiana	I				Food and Drug Administration - Center for Food Safety and Applied Nutrition (US)		Javiana	D1	l,z28	1,5	Javiana	9	l,z28	1,5	24	17	Javiana	Lineage 3		13	12	17	16	13
SAL_CA9920AA	VA-WGS-00371	SAL_CA9920AA	SAL_FA0764AA_AS	PRJNA219491	SRP033708	SAMN03112897	SRS750249	2015-08-27	2014-11-22	Wild Animal	Avian	seagull	2012	7			North America	United States	Virginia						Javiana	I				Food and Drug Administration - Center for Food Safety and Applied Nutrition (US)		Javiana	D1	l,z28	1,5	Javiana	9	l,z28	1,5	24	17	Javiana	Lineage 3		13	12	17	16	13
SAL_CA9922AA	VA-WGS-00370	SAL_CA9922AA	SAL_FA0766AA_AS	PRJNA219491	SRP033708	SAMN03112896	SRS750247	2015-08-27	2014-11-22	Wild Animal	Avian	seagull	2012	7			North America	United States	Virginia						Javiana	I				Food and Drug Administration - Center for Food Safety and Applied Nutrition (US)		Javiana	D1	l,z28	1,5	Javiana	9	l,z28	1,5	24	17	Javiana	Lineage 3		13	12	17	16	13
SAL_CA9985AA	FDA654971 c1 5-1	SAL_CA9985AA	SAL_FA0813AA_AS	PRJNA186035	SRP018785	SAMN02847101	SRS748793	2015-08-27	2014-11-20	Environment	Plant	cucumbers	2010	10			North America	Mexico							Ii 3,10:L,Z28:1,5	II				Food and Drug Administration - Center for Food Safety and Applied Nutrition (US)		Javiana	D1	l,z28	1,5	Javiana	9	l,z28	1,5	24	17	Javiana	Lineage 3		13	12	17	16	13
SAL_CB0223AA	SAL-19-VL-LA-PA-Ryan-0001	SAL_CB0223AA	SAL_AC7776AA_AS	PRJNA324575	SRP121363	SAMN13981355	SRS6132256	2020-02-14	2020-02-11	Companion Animal	Canine	Feces (Canis lupus familiaris)	2019	7			North America	United States	Pennsylvania						Javiana	I				Louisiana State University		Javiana	D1	l,z28	1,5	Javiana	9	l,z28	1,5	24	17	Javiana	Lineage 3		13	12	17	16	13
SAL_CB0284AA	PSU-2368	SAL_CB0284AA	SAL_AC7715AA_AS	PRJNA357723	SRP106794	SAMN14080666	SRS6129000	2020-02-14	2020-02-10	Wild Animal	Amphibian	Cane toad	2012				North America	Grenada							Javiana	I				FDA Center for Food Safety and Applied Nutrition		Javiana	D1	l,z28	1,5	Javiana	9	l,z28	1,5	1674	17	Javiana	Lineage 3		13	12	17	520	13
SAL_CB0285AA	PSU-2370	SAL_CB0285AA	SAL_AC7714AA_AS	PRJNA357723	SRP106794	SAMN14080667	SRS6128999	2020-02-14	2020-02-10	Wild Animal	Rodent	Rat	2017				North America	Grenada							Javiana	I				FDA Center for Food Safety and Applied Nutrition		Javiana	D1	l,z28	1,5		-	l,z28	1,5	4987	17	Javiana	Lineage 3		13	12	728	16	117
SAL_CB0286AA	PSU-2372	SAL_CB0286AA	SAL_AC7713AA_AS	PRJNA357723	SRP106794	SAMN14080660	SRS6128998	2020-02-14	2020-02-10	Wild Animal	Rodent	Rat	2017				North America	Grenada							Javiana	I				FDA Center for Food Safety and Applied Nutrition		Javiana	D1	l,z28	1,5	Javiana	9	l,z28	1,5	4987	17	Javiana	Lineage 3		13	12	728	16	117
SAL_CB0287AA	PSU-2369	SAL_CB0287AA	SAL_BC2206AA_AS	PRJNA357723	SRP106794	SAMN14080668	SRS6128997	2020-02-14	2020-02-10	Wild Animal	Amphibian	Cane toad	2012				North America	Grenada							Javiana	I				FDA Center for Food Safety and Applied Nutrition		Javiana	D1	l,z28	1,5	Javiana	9	l,z28	1,5	1674	17	Javiana	Lineage 3		13	12	17	520	13
SAL_CB0291AA	PSU-2361	SAL_CB0291AA	SAL_AC7708AA_AS	PRJNA357723	SRP106794	SAMN14080658	SRS6128993	2020-02-14	2020-02-10	Wild Animal	ND/Others	Mongoose	2013				North America	Grenada							Javiana	I				FDA Center for Food Safety and Applied Nutrition		Javiana	B	l,z28	1,5	Javiana	9	l,z28	1,5	1674	17	Javiana	Lineage 3		13	12	17	520	13
SAL_CB0292AA	PSU-2365	SAL_CB0292AA	SAL_BC2203AA_AS	PRJNA357723	SRP106794	SAMN14080652	SRS6128990	2020-02-14	2020-02-10	Wild Animal	ND/Others	Mongoose	2013				North America	Grenada							Javiana	I				FDA Center for Food Safety and Applied Nutrition		Javiana	B	l,z28	1,5		-	l,z28	1,5	24	17	Javiana	Lineage 3		13	12	17	16	13
SAL_CB0294AA	PSU-2374	SAL_CB0294AA	SAL_AC7705AA_AS	PRJNA357723	SRP106794	SAMN14080664	SRS6128988	2020-02-14	2020-02-10	Wild Animal	Reptile	Tortoise	2019				North America	Grenada							Javiana	I				FDA Center for Food Safety and Applied Nutrition		Javiana	B	l,z28	1,5		-	l,z28	1,5	24	17	Javiana	Lineage 3		13	12	17	16	13
SAL_CB0295AA	PSU-2360	SAL_CB0295AA	SAL_AC7704AA_AS	PRJNA357723	SRP106794	SAMN14080662	SRS6128987	2020-02-14	2020-02-10	Wild Animal	Reptile	Iguana	2013				North America	Grenada							Javiana	I				FDA Center for Food Safety and Applied Nutrition		Javiana	B	l,z28	1,5		-	l,z28	1,5	1674	17	Javiana	Lineage 3		13	12	17	520	13
SAL_CB0296AA	PSU-2373	SAL_CB0296AA	SAL_BC2202AA_AS	PRJNA357723	SRP106794	SAMN14080663	SRS6128986	2020-02-14	2020-02-10	Wild Animal	Rodent	Rat	2017				North America	Grenada							Javiana	I				FDA Center for Food Safety and Applied Nutrition		Javiana	D1	l,z28	1,5		9,46	l,z28	1,5	4987	17	Javiana	Lineage 3		13	12	728	16	117
SAL_CB0300AA	PSU-2359	SAL_CB0300AA	SAL_AC7699AA_AS	PRJNA357723	SRP106794	SAMN14080655	SRS6128982	2020-02-14	2020-02-10	Wild Animal	ND/Others	Mongoose	2013				North America	Grenada							Javiana	I				FDA Center for Food Safety and Applied Nutrition		Javiana	B	l,z28	1,5		-	l,z28	1,5	1674	17	Javiana	Lineage 3		13	12	17	520	13
SAL_CB0302AA	PSU-2363	SAL_CB0302AA	SAL_AC7697AA_AS	PRJNA357723	SRP106794	SAMN14080530	SRS6128980	2020-02-14	2020-02-10	Wild Animal	ND/Others	Mongoose	2013				North America	Grenada							Javiana	I				FDA Center for Food Safety and Applied Nutrition		Javiana	D1	l,z28	1,5		9,46	l,z28	1,5	24	17	Javiana	Lineage 3		13	12	17	16	13
SAL_CB0305AA	PSU-2364	SAL_CB0305AA	SAL_AC7694AA_AS	PRJNA357723	SRP106794	SAMN14080533	SRS6128976	2020-02-14	2020-02-10	Wild Animal	ND/Others	Mongoose	2013				North America	Grenada							Javiana	I				FDA Center for Food Safety and Applied Nutrition		Javiana	D1	l,z28	1,5		-	l,z28	1,5	24	17	Javiana	Lineage 3		13	12	17	16	13
SAL_CB0306AA	PSU-2362	SAL_CB0306AA	SAL_AC7693AA_AS	PRJNA357723	SRP106794	SAMN14080494	SRS6128974	2020-02-14	2020-02-10	Wild Animal	ND/Others	Mongoose	2013				North America	Grenada							Javiana	I				FDA Center for Food Safety and Applied Nutrition		Javiana	D1	l,z28	1,5		-	l,z28	1,5	1674	17	Javiana	Lineage 3		13	12	17	520	13
SAL_CB0459AA	882896	SAL_CB0459AA	SAL_AC7540AA_AS	PRJNA248792	SRP042645	SAMN14071252	SRS6122869	2020-02-14	2020-02-09	Human	Human	Homo sapiens; human	2020	1			Europe	United Kingdom							Javiana	I				Public Health England		Javiana	D1	l,z28	1,5	Javiana	9	l,z28	1,5	1674	17	Javiana	Lineage 3		13	12	17	520	13
SAL_CB1074AA	FSIS12028210	SAL_CB1074AA	SAL_AC5354AA_AS	PRJNA242847	SRP040648	SAMN13977787	SRS6098795	2020-02-14	2020-02-04	Livestock	Bovine	comminuted beef	2020				North America	United States	Texas						Javiana	I				USDA FSIS		Javiana	D1	l,z28	1,5	Javiana	9	l,z28	1,5	371	17	Javiana	Lineage 3		13	12	17	16	117
SAL_CB2733AA	884468	SAL_CB2733AA	SAL_AC8151AA_AS	PRJNA248792	SRP042645	SAMN14113812	SRS6150660	2020-02-16	2020-02-15	Human	Human	Homo sapiens; human	2020	1			Europe	United Kingdom							Javiana	I				Public Health England		Javiana	D1	l,z28	1,5	Javiana	9	l,z28	1,5	1547	17	Javiana	Lineage 3		60	12	17	16	13
SAL_CB2821AA	FSIS22027013	SAL_CB2821AA	SAL_AC9772AA_AS	PRJNA242847	SRP040648	SAMN14120604	SRS6155237	2020-02-18	2020-02-17	Poultry	Poultry	Comminuted Turkey	2020				North America	United States	Virginia							I				USDA FSIS		Javiana	D1	l,z28	1,5		9,46	l,z28	1,5	1674	17	Javiana	Lineage 3		13	12	17	520	13
SAL_CB3873AA	CNSV-T34-MA10-RV-10-C	SAL_CB3873AA	SAL_BC7150AA_AS	PRJNA578395	SRP247421	SAMN14207270	SRS6215863	2020-02-26	2020-02-25	Environment	Water/River	pond water	2018				North America	United States	Maryland											FDA Center for Food Safety and Applied Nutrition		Javiana	D1	l,z28	l,z13,z28		9	l,z28	-	24	17	Javiana	Lineage 3		13	12	17	16	13
SAL_CB3892AA	CNSV-T34-MA10-RV-10-A	SAL_CB3892AA	SAL_BC7131AA_AS	PRJNA578395	SRP247421	SAMN14207177	SRS6215700	2020-02-26	2020-02-25	Environment	Water/River	pond water	2018				North America	United States	Maryland											FDA Center for Food Safety and Applied Nutrition		Javiana	D1	l,z28	l,z13,z28		9	l,z28	-	24	17	Javiana	Lineage 3		13	12	17	16	13
SAL_CB4250AA	SMG-20-436	SAL_CB4250AA	SAL_BC8760AA_AS					2020-02-28	2020-02-28								Europe	United Kingdom	Scotland											D. Brown (Scotland)		Javiana	D1	l,z28	1,5	Javiana	9	l,z28	1,5	24	17	Javiana	Lineage 3		13	12	17	16	13
SAL_CB4409AA	PNUSAS136490	SAL_CB4409AA	SAL_BC9401AA_AS	PRJNA284276	SRP059203	SAMN14239584	SRS6227711	2020-02-28	2020-02-28	Livestock	Bovine	bovine	2019	12			North America	United States	Texas											PulseNet Next Generation Subtyping Methods Unit		Javiana	D1	l,z28	1,5	Javiana	9	l,z28	1,5	24	17	Javiana	Lineage 3		13	12	17	16	13
SAL_CB4410AA	PNUSAS136478	SAL_CB4410AA	SAL_BC9400AA_AS	PRJNA284276	SRP059203	SAMN14239586	SRS6227710	2020-02-28	2020-02-28	Companion Animal	Feline	feline	2019	12			North America	United States	Texas											PulseNet Next Generation Subtyping Methods Unit		Javiana	D1	l,z28	1,5	Javiana	9	l,z28	1,5	24	17	Javiana	Lineage 3		13	12	17	16	13
SAL_CB4447AA	SMG-20-450	SAL_CB4447AA	SAL_CC1759AA_AS					2020-03-02	2020-03-02								Europe	United Kingdom	Scotland											D. Brown (Scotland)		Javiana	D1	l,z28	1,5	Javiana	9	l,z28	1,5	1674	17	Javiana	Lineage 3		13	12	17	520	13
SAL_CB5825AA	CFSAN098048	SAL_CB5825AA	SAL_CC9927AA_AS	PRJNA186035	SRP018785	SAMN14334639	SRS6283445	2020-03-11	2020-03-09	Poultry	Poultry	Poultry manure (Gallus gallus)	2018	2			North America	United States	Arizona											FDA Center for Food Safety and Applied Nutrition		Javiana	D1	l,z28	1,5	Javiana	9	l,z28	1,5	24	17	Javiana	Lineage 3		13	12	17	16	13
SAL_CB5835AA	CFSAN098047	SAL_CB5835AA	SAL_CC9917AA_AS	PRJNA186035	SRP018785	SAMN14334656	SRS6283293	2020-03-11	2020-03-09	Poultry	Poultry	Poultry manure (Gallus gallus)	2018	2			North America	United States	Arizona											FDA Center for Food Safety and Applied Nutrition		Javiana	D1	l,z28	1,5	Javiana	9	l,z28	1,5	24	17	Javiana	Lineage 3		13	12	17	16	13
SAL_CB6010AA	SMG-20-514	SAL_CB6010AA	SAL_DC1075AA_AS					2020-03-12	2020-03-12				2020				Europe	United Kingdom	Scotland											D. Brown (Scotland)		Javiana	D1	l,z28	1,5	Javiana	9	l,z28	1,5	1547	17	Javiana	Lineage 3		60	12	17	16	13
SAL_CB6279AA	CVM 45549	SAL_CB6279AA	SAL_DC7843AA_AS	PRJNA613405	SRP253326	SAMN14404245	SRS6338538	2020-03-20	2020-03-19	Environment	Plant	Pluck Shop	2016				North America	Trinidad and Tobago	Couva-Tabaquite-Talparo						['Javiana',					FDA-CVM		Javiana	D1	l,z28	1,5	Javiana	9	l,z28	1,5	1674	17	Javiana	Lineage 3		13	12	17	520	13
SAL_CB6290AA	CVM 45548	SAL_CB6290AA	SAL_DC8219AA_AS	PRJNA613405	SRP253326	SAMN14404244	SRS6338527	2020-03-20	2020-03-19	Environment	Plant	Pluck Shop	2016				North America	Trinidad and Tobago	Couva-Tabaquite-Talparo						['Javiana',					FDA-CVM		Javiana	D1	l,z28	1,5	Javiana	9	l,z28	1,5	1674	17	Javiana	Lineage 3		13	12	17	520	13
SAL_CB6301AA	CVM 45547	SAL_CB6301AA	SAL_DC7821AA_AS	PRJNA613405	SRP253326	SAMN14404243	SRS6338516	2020-03-20	2020-03-19	Environment	Plant	Pluck Shop	2016				North America	Trinidad and Tobago	Couva-Tabaquite-Talparo						['Javiana',					FDA-CVM		Javiana	D1	l,z28	1,5	Javiana	9	l,z28	1,5	1674	17	Javiana	Lineage 3		13	12	17	520	13
SAL_CB6312AA	CVM 45552	SAL_CB6312AA	SAL_DC7810AA_AS	PRJNA613405	SRP253326	SAMN14404248	SRS6338505	2020-03-20	2020-03-19	Environment	Plant	Processing Plant	2018				North America	Trinidad and Tobago	Couva-Tabaquite-Talparo						['Javiana',					FDA-CVM		Javiana	D1	l,z28	1,5	Javiana	9	l,z28	1,5	24	17	Javiana	Lineage 3		13	12	17	16	13
SAL_CB6313AA	CVM 45551	SAL_CB6313AA	SAL_DC7809AA_AS	PRJNA613405	SRP253326	SAMN14404247	SRS6338504	2020-03-20	2020-03-19	Environment	Plant	Processing Plant	2018				North America	Trinidad and Tobago	Couva-Tabaquite-Talparo						['Javiana',					FDA-CVM		Javiana	D1	l,z28	1,5	Javiana	9	l,z28	1,5	24	17	Javiana	Lineage 3		13	12	17	16	13
SAL_CB6316AA	CVM 45550	SAL_CB6316AA	SAL_DC7806AA_AS	PRJNA613405	SRP253326	SAMN14404246	SRS6338501	2020-03-20	2020-03-19	Food	ND/Others	Supermarket	2017				North America	Trinidad and Tobago	Couva-Tabaquite-Talparo						['Javiana',					FDA-CVM		Javiana	D1	l,z28	1,5	Javiana	9	l,z28	1,5	1674	17	Javiana	Lineage 3		13	12	17	520	13
SAL_CB6328AA	CVM 45546	SAL_CB6328AA	SAL_DC7794AA_AS	PRJNA613405	SRP253326	SAMN14404242	SRS6338489	2020-03-20	2020-03-19	Environment	Plant	Pluck Shop	2016				North America	Trinidad and Tobago	Couva-Tabaquite-Talparo						['Javiana',					FDA-CVM		Javiana	D1	l,z28	1,5	Javiana	9	l,z28	1,5	1674	17	Javiana	Lineage 3		13	12	17	520	13
SAL_CB6329AA	CVM 45545	SAL_CB6329AA	SAL_DC7793AA_AS	PRJNA613405	SRP253326	SAMN14404241	SRS6338488	2020-03-20	2020-03-19	Environment	Plant	Pluck Shop	2016				North America	Trinidad and Tobago	Couva-Tabaquite-Talparo						['Javiana',					FDA-CVM		Javiana	D1	l,z28	1,5	Javiana	9	l,z28	1,5	24	17	Javiana	Lineage 3		13	12	17	16	13
SAL_CB6403AA	SAL-19-VL-LA-TX-0015	SAL_CB6403AA	SAL_DC7696AA_AS	PRJNA324575	SRP121363	SAMN14384385	SRS6329145	2020-03-20	2020-03-17	Livestock	Bovine	Liver (Bos taurus)	2019	11			North America	United States	Texas						Javiana	I				Louisiana State University		Javiana	D1	l,z28	1,5	Javiana	9	l,z28	1,5	1674	17	Javiana	Lineage 3		13	12	17	520	13
SAL_CB6687AA	903418	SAL_CB6687AA	SAL_DC9710AA_AS	PRJNA248792	SRP042645	SAMN14418800	SRS6349655	2020-03-22	2020-03-21	Human	Human	Homo sapiens; human	2020	3			Europe	United Kingdom							Javiana	I				Public Health England		Javiana	D1	l,z28	1,5	Javiana	9	l,z28	1,5	1547	17	Javiana	Lineage 3		60	12	17	16	13
SAL_CB6973AA	896975	SAL_CB6973AA	SAL_EC0780AA_AS	PRJNA248792	SRP042645	SAMN14420815	SRS6350799	2020-03-23	2020-03-22	Human	Human	Homo sapiens; human	2020	2			Europe	United Kingdom							Javiana	I				Public Health England		Javiana	D1	l,z28	1,5	Javiana	9	l,z28	1,5	1547	17	Javiana	Lineage 3		60	12	17	16	13
SAL_CB6988AA	FDA1140482-001-001	SAL_CB6988AA	SAL_EC1318AA_AS	PRJNA186035	SRP018785	SAMN14426498	SRS6355021	2020-03-24	2020-03-23	Environment	Plant	Frozen Cassava Leaves	2020	2			Asia	Vietnam												FDA Center for Food Safety and Applied Nutrition		Panama	D1	l,z28	1,5	Javiana	9	l,z28	1,5	2494	17	Javiana	Lineage 3		60	429	17	662	13
SAL_CB7308AA	VL-0618-13	SAL_CB7308AA	SAL_EC3653AA_AS					2020-03-26	2020-03-26																					785-532-1299		Javiana	D1	l,z28	1,5	Javiana	9	l,z28	1,5	1547	17	Javiana	Lineage 3		60	12	17	16	13
SAL_CB7623AA	PNUSAS139868	SAL_CB7623AA	SAL_EC4950AA_AS	PRJNA271470	SRP061987	SAMN14446544	SRS6375507	2020-03-28	2020-03-25	Human	Human	Homo sapiens; stool	2016	3			North America	United States	Maryland											PulseNet Next Generation Subtyping Methods Unit		Javiana	D1	l,z28	1,5	Javiana	9	l,z28	1,5	24	17	Javiana	Lineage 3		13	12	17	16	13
SAL_CB7644AA	2015AM-3378	SAL_CB7644AA	SAL_EC4876AA_AS	PRJNA271470	SRP061987	SAMN14446519	SRS6375486	2020-03-28	2020-03-25	Human	Human	Homo sapiens; stool	2015	12			North America	United States	Maryland											PulseNet Next Generation Subtyping Methods Unit		Javiana	B	l,z28	1,5		-	l,z28	1,5	24	17	Javiana	Lineage 3		13	12	17	16	13
SAL_CB7742AA	U2582s	SAL_CB7742AA	SAL_EC6094AA_AS	PRJNA377900	SRP103097	SAMN14467062	SRS6383808	2020-03-29	2020-03-27	Livestock	Swine	Sus scrofa domesticus Caeca content	2019	4			South America	Ecuador												PulseNet Next Generation Subtyping Methods Unit		Javiana	D1	l,z28	1,5	Javiana	9	l,z28	1,5	1674	17	Javiana	Lineage 3		13	12	17	520	13
SAL_CB7934AA	PNUSAS140124	SAL_CB7934AA	SAL_EC8157AA_AS	PRJNA271470	SRP061987	SAMN14485879	SRS6399103	2020-03-31	2020-03-30	Human	Human	Homo sapiens; stool	2015	11			North America	United States	Maryland											PulseNet Next Generation Subtyping Methods Unit		Javiana	D1	l,z28	1,5	Javiana	9	l,z28	1,5	24	17	Javiana	Lineage 3		13	12	17	16	13
SAL_CB7949AA	PNUSAS140108	SAL_CB7949AA	SAL_EC8142AA_AS	PRJNA271470	SRP061987	SAMN14485884	SRS6398999	2020-03-31	2020-03-30	Human	Human	Homo sapiens; stool	2015	11			North America	United States	Maryland											PulseNet Next Generation Subtyping Methods Unit		Javiana	D1	l,z28	1,5	Javiana	9	l,z28	1,5	24	17	Javiana	Lineage 3		13	12	17	16	13
SAL_CB7987AA	FDA1142136-C002-014	SAL_CB7987AA	SAL_EC8704AA_AS	PRJNA186035	SRP018785	SAMN14487837	SRS6400832	2020-04-01	2020-03-31	Environment	Soil/Dust	Suspected Kratom (soil conditioner)	2020	3			Asia	Indonesia												FDA Center for Food Safety and Applied Nutrition		Javiana	D1	l,z28	1,5	Javiana	9	l,z28	1,5	1547	17	Javiana	Lineage 3		60	12	17	16	13
SAL_CB8006AA	FDA1142136-C002-008	SAL_CB8006AA	SAL_EC8863AA_AS	PRJNA186035	SRP018785	SAMN14486645	SRS6399937	2020-04-01	2020-03-31	Environment	Soil/Dust	Suspected Kratom (soil conditioner)	2020	3			Asia	Indonesia												FDA Center for Food Safety and Applied Nutrition		Javiana	D1	l,z28	1,5	Javiana	9	l,z28	1,5	1547	17	Javiana	Lineage 3		60	12	17	16	13
SAL_CB8059AA	914481	SAL_CB8059AA	SAL_EC9321AA_AS	PRJNA248792	SRP042645	SAMN14488358	SRS6401710	2020-04-02	2020-04-01	Food	ND/Others	food	2020	3			Europe	United Kingdom							Javiana	I				Public Health England		Javiana	D1	l,z28	1,5	Javiana	9	l,z28	1,5	24	17	Javiana	Lineage 3		13	12	17	16	13
SAL_CB8081AA	914520	SAL_CB8081AA	SAL_EC9299AA_AS	PRJNA248792	SRP042645	SAMN14488326	SRS6401670	2020-04-02	2020-04-01	Food	ND/Others	food	2020	3			Europe	United Kingdom							Javiana	I				Public Health England		Javiana	D1	l,z28	1,5	Javiana	9	l,z28	1,5	24	17	Javiana	Lineage 3		13	12	17	16	13
SAL_CB8335AA	CVM 24212	SAL_CB8335AA	SAL_FC0012AA_AS	PRJNA622256	SRP254729	SAMN14504672	SRS6407477	2020-04-02	2020-04-02	Livestock	Equine	equine	2003				North America	United States	Tennessee						['Javiana',					FDA-CVM		Javiana	D1	l,z28	1,5	Javiana	9	l,z28	1,5	24	17	Javiana	Lineage 3		13	12	17	16	13
SAL_CB9029AA	89	SAL_CB9029AA	SAL_FC5495AA_AS	PRJNA433689	SRP255549	SAMN08514303	SRS6440853	2020-04-08	2020-04-08	Livestock	Bovine	Equus ferus caballus; feces	2008				North America	United States	Texas				30.61	-96.35	Javiana	I				Keri Norman's shared submissions		Javiana	D1	l,z28	1,5	Javiana	9	l,z28	1,5	7930	17	Javiana	Lineage 3		13	12	17	1544	13
SAL_CB9037AA	81	SAL_CB9037AA	SAL_FC5487AA_AS	PRJNA433689	SRP255549	SAMN08514295	SRS6440846	2020-04-08	2020-04-08	Livestock	Bovine	Equus ferus caballus; feces	2008				North America	United States	Texas				30.61	-96.35	Javiana	I				Keri Norman's shared submissions		Javiana	D1	l,z28	1,5	Javiana	9	l,z28	1,5	24	17	Javiana	Lineage 3		13	12	17	16	13
SAL_CB9039AA	80	SAL_CB9039AA	SAL_FC5485AA_AS	PRJNA433689	SRP255549	SAMN08514294	SRS6440845	2020-04-08	2020-04-08	Livestock	Bovine	Equus ferus caballus; feces	2008				North America	United States	Texas				30.61	-96.35	Javiana	I				Keri Norman's shared submissions		Javiana	D1	l,z28	1,5	Javiana	9	l,z28	1,5	24	17	Javiana	Lineage 3		13	12	17	16	13
SAL_CB9060AA	7	SAL_CB9060AA	SAL_FC5464AA_AS	PRJNA433689	SRP255549	SAMN08514221	SRS6440823	2020-04-08	2020-04-08	Livestock	Bovine	Equus ferus caballus; feces	2009				North America	United States	Texas				30.61	-96.35	Javiana	I				Keri Norman's shared submissions		Javiana	D1	l,z28	1,5	Javiana	9	l,z28	1,5	24	17	Javiana	Lineage 3		13	12	17	16	13
SAL_CB9081AA	41	SAL_CB9081AA	SAL_FC5443AA_AS	PRJNA433689	SRP255549	SAMN08514255	SRS6440802	2020-04-08	2020-04-08	Livestock	Bovine	Equus ferus caballus; feces	2007				North America	United States	Texas				30.61	-96.35	Javiana	I				Keri Norman's shared submissions		Javiana	D1	l,z28	1,5	Javiana	9	l,z28	1,5	24	17	Javiana	Lineage 3		13	12	17	16	13
SAL_CB9089AA	34	SAL_CB9089AA	SAL_FC5435AA_AS	PRJNA433689	SRP255549	SAMN08514248	SRS6440794	2020-04-08	2020-04-08	Livestock	Bovine	Equus ferus caballus; feces	2007				North America	United States	Texas				30.61	-96.35	Javiana	I				Keri Norman's shared submissions		Javiana	D1	l,z28	1,5	Javiana	9	l,z28	1,5	24	17	Javiana	Lineage 3		13	12	17	16	13
SAL_CB9090AA	33	SAL_CB9090AA	SAL_FC5434AA_AS	PRJNA433689	SRP255549	SAMN08514247	SRS6440793	2020-04-08	2020-04-08	Livestock	Bovine	Equus ferus caballus; feces	2007				North America	United States	Texas				30.61	-96.35	Javiana	I				Keri Norman's shared submissions		Javiana	D1	l,z28	1,5	Javiana	9	l,z28	1,5	24	17	Javiana	Lineage 3		13	12	17	16	13
SAL_CB9098AA	255	SAL_CB9098AA	SAL_FC5426AA_AS	PRJNA433689	SRP255549	SAMN08514469	SRS6440785	2020-04-08	2020-04-08	Livestock	Bovine	Equus ferus caballus; feces	2015				North America	United States	Texas				30.61	-96.35	Javiana	I				Keri Norman's shared submissions		Javiana	D1	l,z28	1,5	Javiana	9	l,z28	1,5	24	17	Javiana	Lineage 3		13	12	17	16	13
SAL_CB9138AA	218	SAL_CB9138AA	SAL_FC5354AA_AS	PRJNA433689	SRP255549	SAMN08514432	SRS6440744	2020-04-08	2020-04-08	Livestock	Bovine	Equus ferus caballus; feces	2014				North America	United States	Texas				30.61	-96.35	Javiana	I				Keri Norman's shared submissions		Javiana	D1	l,z28	1,5	Javiana	9	l,z28	1,5	24	17	Javiana	Lineage 3		13	12	17	16	13
SAL_CB9147AA	210	SAL_CB9147AA	SAL_FC5345AA_AS	PRJNA433689	SRP255549	SAMN08514424	SRS6440735	2020-04-08	2020-04-08	Livestock	Bovine	Equus ferus caballus; feces	2013				North America	United States	Texas				30.61	-96.35	Javiana	I				Keri Norman's shared submissions		Javiana	D1	l,z28	1,5	Javiana	9	l,z28	1,5	24	17	Javiana	Lineage 3		13	12	17	16	13
SAL_CB9164AA	194	SAL_CB9164AA	SAL_FC5328AA_AS	PRJNA433689	SRP255549	SAMN08514408	SRS6440718	2020-04-08	2020-04-08	Livestock	Bovine	Equus ferus caballus; feces	2012				North America	United States	Texas				30.61	-96.35	Javiana	I				Keri Norman's shared submissions		Javiana	D1	l,z28	1,5	Javiana	9	l,z28	1,5	24	17	Javiana	Lineage 3		13	12	17	16	13
SAL_CB9167AA	191	SAL_CB9167AA	SAL_FC5325AA_AS	PRJNA433689	SRP255549	SAMN08514405	SRS6440715	2020-04-08	2020-04-08	Livestock	Bovine	Equus ferus caballus; feces	2012				North America	United States	Texas				30.61	-96.35	Javiana	I				Keri Norman's shared submissions		Javiana	D1	l,z28	1,5	Javiana	9	l,z28	1,5	24	17	Javiana	Lineage 3		13	12	17	16	13
SAL_CB9188AA	171	SAL_CB9188AA	SAL_FC5304AA_AS	PRJNA433689	SRP255549	SAMN08514385	SRS6440694	2020-04-08	2020-04-08	Livestock	Bovine	Equus ferus caballus; feces	2011				North America	United States	Texas				30.61	-96.35	Javiana	I				Keri Norman's shared submissions		Javiana	D1	l,z28	1,5	Javiana	9	l,z28	1,5	1674	17	Javiana	Lineage 3		13	12	17	520	13
SAL_CB9267AA	PNUSAS141249	SAL_CB9267AA	SAL_FC5407AA_AS	PRJNA271470	SRP061987	SAMN14549327	SRS6442299	2020-04-08	2020-04-08	Human	Human	Homo sapiens; stool	2015	10			North America	United States	Maryland											PulseNet Next Generation Subtyping Methods Unit		Javiana	D1	l,z28	1,5		9,46	l,z28	1,5	24	17	Javiana	Lineage 3		13	12	17	16	13
SAL_CB9272AA	2015AM-2990	SAL_CB9272AA	SAL_FC5402AA_AS	PRJNA271470	SRP061987	SAMN14549317	SRS6442293	2020-04-08	2020-04-08	Human	Human	Homo sapiens; stool	2015	10			North America	United States	Maryland											PulseNet Next Generation Subtyping Methods Unit		Javiana	D1	l,z28	1,5	Javiana	9	l,z28	1,5	24	17	Javiana	Lineage 3		13	12	17	16	13
SAL_CB9274AA	PNUSAS141252	SAL_CB9274AA	SAL_FC5400AA_AS	PRJNA271470	SRP061987	SAMN14549323	SRS6442291	2020-04-08	2020-04-08	Human	Human	Homo sapiens; stool	2015	10			North America	United States	Maryland											PulseNet Next Generation Subtyping Methods Unit		Javiana	D1	l,z28	1,5	Javiana	9	l,z28	1,5	24	17	Javiana	Lineage 3		13	12	17	16	13
SAL_CB9280AA	2015AM-2989	SAL_CB9280AA	SAL_FC5394AA_AS	PRJNA271470	SRP061987	SAMN14549299	SRS6442284	2020-04-08	2020-04-08	Human	Human	Homo sapiens; stool	2015	10			North America	United States	Maryland											PulseNet Next Generation Subtyping Methods Unit		Javiana	D1	l,z28	1,5	Javiana	9	l,z28	1,5	24	17	Javiana	Lineage 3		13	12	17	16	13
SAL_CB9281AA	PNUSAS141241	SAL_CB9281AA	SAL_FC5393AA_AS	PRJNA271470	SRP061987	SAMN14549314	SRS6442283	2020-04-08	2020-04-08	Human	Human	Homo sapiens; stool	2015	10			North America	United States	Maryland											PulseNet Next Generation Subtyping Methods Unit		Javiana	D1	l,z28	1,5	Javiana	9	l,z28	1,5	24	17	Javiana	Lineage 3		13	12	17	16	13
SAL_CB9285AA	PNUSAS141237	SAL_CB9285AA	SAL_FC5389AA_AS	PRJNA271470	SRP061987	SAMN14549319	SRS6442279	2020-04-08	2020-04-08	Human	Human	Homo sapiens; stool	2015	10			North America	United States	Maryland											PulseNet Next Generation Subtyping Methods Unit		Javiana	D1	l,z28	1,5	Javiana	9	l,z28	1,5	24	17	Javiana	Lineage 3		13	12	17	16	13
SAL_CB9289AA	PNUSAS141248	SAL_CB9289AA	SAL_FC5385AA_AS	PRJNA271470	SRP061987	SAMN14549326	SRS6442217	2020-04-08	2020-04-08	Human	Human	Homo sapiens; stool	2015	11			North America	United States	Maryland											PulseNet Next Generation Subtyping Methods Unit		Javiana	D1	l,z28	1,5	Javiana	9	l,z28	1,5	24	17	Javiana	Lineage 3		13	12	17	16	13
SAL_CB9404AA	PNUSAS141402	SAL_CB9404AA	SAL_FC7381AA_AS	PRJNA271470	SRP061987	SAMN14560339	SRS6453191	2020-04-11	2020-04-10	Human	Human	Homo sapiens; stool	2015	9			North America	United States	Maryland											PulseNet Next Generation Subtyping Methods Unit		Javiana	D1	l,z28	1,5	Javiana	9	l,z28	1,5	24	17	Javiana	Lineage 3		13	12	17	16	13
SAL_CB9405AA	PNUSAS141379	SAL_CB9405AA	SAL_FC7380AA_AS	PRJNA271470	SRP061987	SAMN14560348	SRS6453189	2020-04-11	2020-04-10	Human	Human	Homo sapiens; stool	2015	10			North America	United States	Maryland											PulseNet Next Generation Subtyping Methods Unit		Javiana	D1	l,z28	1,5	Javiana	9	l,z28	1,5	24	17	Javiana	Lineage 3		13	12	17	16	13
SAL_CB9411AA	PNUSAS141404	SAL_CB9411AA	SAL_FC7374AA_AS	PRJNA271470	SRP061987	SAMN14560355	SRS6453150	2020-04-11	2020-04-10	Human	Human	Homo sapiens; stool					North America	United States	Maryland											PulseNet Next Generation Subtyping Methods Unit		Javiana	D1	l,z28	1,5		9,46	l,z28	1,5	1674	17	Javiana	Lineage 3		13	12	17	520	13
SAL_CB9419AA	PNUSAS141401	SAL_CB9419AA	SAL_FC7368AA_AS	PRJNA271470	SRP061987	SAMN14560340	SRS6452969	2020-04-11	2020-04-10	Human	Human	Homo sapiens; stool	2015	9			North America	United States	Maryland											PulseNet Next Generation Subtyping Methods Unit		Javiana	D1	l,z28	1,5	Javiana	9	l,z28	1,5	24	17	Javiana	Lineage 3		13	12	17	16	13
SAL_CB9425AA	PNUSAS141391	SAL_CB9425AA	SAL_FC7362AA_AS	PRJNA271470	SRP061987	SAMN14560329	SRS6452900	2020-04-11	2020-04-10	Human	Human	Homo sapiens; other	2015	8			North America	United States	Maryland											PulseNet Next Generation Subtyping Methods Unit		Javiana	D1	l,z28	1,5	Javiana	9	l,z28	1,5	24	17	Javiana	Lineage 3		13	12	17	16	13
SAL_CB9428AA	PNUSAS141398	SAL_CB9428AA	SAL_FC7359AA_AS	PRJNA271470	SRP061987	SAMN14560343	SRS6452893	2020-04-11	2020-04-10	Human	Human	Homo sapiens; stool	2015	8			North America	United States	Maryland											PulseNet Next Generation Subtyping Methods Unit		Javiana	D1	l,z28	1,5	Javiana	9	l,z28	1,5	24	17	Javiana	Lineage 3		13	12	17	16	13
SAL_CB9429AA	PNUSAS141381	SAL_CB9429AA	SAL_FC7358AA_AS	PRJNA271470	SRP061987	SAMN14560346	SRS6452815	2020-04-11	2020-04-10	Human	Human	Homo sapiens; stool	2015	9			North America	United States	Maryland											PulseNet Next Generation Subtyping Methods Unit		Javiana	D1	l,z28	1,5	Javiana	9	l,z28	1,5	24	17	Javiana	Lineage 3		13	12	17	16	13
SAL_CB9433AA	PNUSAS141397	SAL_CB9433AA	SAL_FC7354AA_AS	PRJNA271470	SRP061987	SAMN14560323	SRS6452806	2020-04-11	2020-04-10	Human	Human	Homo sapiens; stool	2015	8			North America	United States	Maryland											PulseNet Next Generation Subtyping Methods Unit		Javiana	D1	l,z28	1,5	Javiana	9	l,z28	1,5	24	17	Javiana	Lineage 3		13	12	17	16	13
SAL_CB9434AA	PNUSAS141405	SAL_CB9434AA	SAL_FC7353AA_AS	PRJNA271470	SRP061987	SAMN14560354	SRS6452805	2020-04-11	2020-04-10	Human	Human	Homo sapiens; stool	2015	9			North America	United States	Maryland											PulseNet Next Generation Subtyping Methods Unit		Javiana	D1	l,z28	1,5	Javiana	9	l,z28	1,5	24	17	Javiana	Lineage 3		13	12	17	16	13
SAL_CB9479AA	29692RN1T95	SAL_CB9479AA	SAL_FC9464AA_AS					2020-04-13	2020-04-13	Poultry	Unspecified Meat		2019	10	19		North America	United States	California											Naga		Javiana	D1	l,z28	1,5	Javiana	9	l,z28	1,5	24	17	Javiana	Lineage 3		13	12	17	16	13
SAL_CB9638AA	29692RN1T277	SAL_CB9638AA	SAL_GC1226AA_AS					2020-04-15	2020-04-15	Poultry	Unspecified Meat		2019	10	19		North America	United States	California											Naga		Javiana	D1	l,z28	l,z13,z28		9	l,z28	-	24	17	Javiana	Lineage 3		13	12	17	16	13
SAL_CB9681AA	924811	SAL_CB9681AA	SAL_GC2860AA_AS	PRJNA248792	SRP042645	SAMN14602804	SRS6484785	2020-04-17	2020-04-16	Human	Human	Homo sapiens; human	2020	4			Europe	United Kingdom							Javiana	I				Public Health England		Javiana	D1	l,z28	1,5	Javiana	9	l,z28	1,5	24	17	Javiana	Lineage 3		13	12	17	16	13
SAL_CB9887AA	FSL S5-395	SAL_CB9887AA	SAL_HC1501AA_AS	PRJNA627875	SRP258282	SAMN14689087	SRS6531218	2020-04-28	2020-04-24	Human	Human	Homo sapiens	2004	3			North America	United States							Javiana					Institut de Biologie Integrative et des Systemes		Javiana	D1	l,z28	1,5	Javiana	9	l,z28	1,5	24	17	Javiana	Lineage 3		13	12	17	16	13
SAL_DA0010AA	FDA883841 1-15	SAL_DA0010AA	SAL_FA0833AA_AS	PRJNA186035	SRP018785	SAMN03195936	SRS747910	2015-08-27	2014-11-19	ND	ND/Others	pecans truffles	2014	10			North America	Mexico							Javiana (Predicted)					Food and Drug Administration - Center for Food Safety and Applied Nutrition (US)		Javiana	D1	l,z28	1,5	Javiana	9	l,z28	1,5	24	17	Javiana	Lineage 3		13	12	17	16	13
SAL_DA0038AA	2011K-1922	SAL_DA0038AA	SAL_FA0859AA_AS	PRJNA230403	SRP040281	SAMN03177801	SRS745621	2015-08-27	2014-11-18								North America	United States												Centers for Disease Control and Prevention - PulseNet		Javiana	D1	l,z28	l,z13,z28		9	l,z28	-	24	17	Javiana	Lineage 3		13	12	17	16	13
SAL_DA0070AA	FLUFL-578	SAL_DA0070AA	SAL_FA0875AA_AS	PRJNA183848	SRP028812	SAMN03114954	SRS744898	2015-08-27	2014-11-18	Environment	Soil/Dust	sediment	2011	7			North America	United States	Georgia						Javiana	I				Food and Drug Administration - Center for Food Safety and Applied Nutrition (US)		Javiana	D1	l,z28	1,5	Javiana	9	l,z28	1,5	24	17	Javiana	Lineage 3		13	12	17	16	13
SAL_DA0098AA	FDA652358 5-1	SAL_DA0098AA	SAL_FA0901AA_AS	PRJNA186035	SRP018785	SAMN02847084	SRS744869	2015-08-27	2014-11-18	Environment	Plant	cucumbers	2010	10			North America	Mexico							Javiana	I				Food and Drug Administration - Center for Food Safety and Applied Nutrition (US)		Javiana	D1	l,z28	1,5	Javiana	9	l,z28	1,5	24	17	Javiana	Lineage 3		13	12	17	16	13
SAL_DA0106AA	FDA309718	SAL_DA0106AA	SAL_FA0905AA_AS	PRJNA186035	SRP018785	SAMN02844126	SRS744861	2015-08-27	2014-11-18	Aquatic Animal	Shellfish	frozen shrimp	2004	12			South America	Venezuela							Javiana	I				Food and Drug Administration - Center for Food Safety and Applied Nutrition (US)		Javiana	D1	l,z28	1,5	Javiana	9	l,z28	1,5	24	17	Javiana	Lineage 3		13	12	17	16	13
SAL_DA0107AA	FLUFL-572	SAL_DA0107AA	SAL_CA0055AA_AS	PRJNA183848	SRP028812	SAMN03114950	SRS744859	2015-08-27	2014-11-18	Environment	Water/River	pond water	2011	7			North America	United States	Georgia						Javiana	I				FDA		Javiana	D1	l,z28	1,5	Javiana	9	l,z28	1,5	24	17	Javiana	Lineage 3		13	12	17	16	13
SAL_DA0125AA	FDA323923	SAL_DA0125AA	SAL_FA0924AA_AS	PRJNA186035	SRP018785	SAMN02844168	SRS744839	2015-08-27	2014-11-18	Aquatic Animal	Shellfish	frz shrimp	2005	3			South America	Ecuador							Javiana	I				Food and Drug Administration - Center for Food Safety and Applied Nutrition (US)		Javiana	D1	l,z28	1,5	Javiana	9	l,z28	1,5	1674	17	Javiana	Lineage 3		13	12	17	520	13
SAL_DA0136AA	FDA324859	SAL_DA0136AA	SAL_BA3417AA_AS	PRJNA186035	SRP018785	SAMN02844171	SRS744827	2015-08-27	2014-11-18	Environment	Plant	sage	2005	3			Europe	Albania							Javiana	I				Food and Drug Administration - Center for Food Safety and Applied Nutrition (US)		Javiana	D1	l,z28	1,5	Javiana	9	l,z28	1,5	2188	17	Javiana	Lineage 3		60	12	17	16	13
SAL_DA0199AA	FLUFL-534	SAL_DA0199AA	SAL_FA0972AA_AS	PRJNA183848	SRP028812	SAMN03114932	SRS743578	2015-08-27	2014-11-13	Environment	Soil/Dust	sediment	2011	7			North America	United States	Georgia						Javiana (Predicted)					FDA		Javiana	D1	l,z28	1,5	Javiana	9	l,z28	1,5	24	17	Javiana	Lineage 3		13	12	17	16	13
SAL_DA0295AA	FDA885347-1-1	SAL_DA0295AA	SAL_FA1013AA_AS	PRJNA186035	SRP018785	SAMN03161125	SRS741213	2015-08-27	2014-11-08	Environment	Plant	persian cucumbers	2014	10			North America	Mexico							Javiana	I				Food and Drug Administration - Center for Food Safety and Applied Nutrition (US)		Javiana	D1	l,z28	1,5	Javiana	9	l,z28	1,5	24	17	Javiana	Lineage 3		13	12	17	16	13
SAL_DA1431AA	H083740664	SAL_DA1431AA	SAL_FA1350AA_AS	PRJNA248792	SRP042645	SAMN03165950	SRS738431	2015-08-27	2014-11-12	Food	ND/Others	food	2008	9			Europe	United Kingdom	England	London					Javiana (Predicted)	I				Public Health England - Gastrointestinal Bacteria Reference Unit		Javiana	D1	l,z28	1,5	Javiana	9	l,z28	1,5	1547	17	Javiana	Lineage 3		60	12	17	16	13
SAL_DA1445AA	FLUFL-526	SAL_DA1445AA	SAL_IA9936AA_AS	PRJNA183848	SRP028812	SAMN03114929	SRS737106	2015-08-27	2014-11-05	Environment	Soil/Dust	sediment	2011	7			North America	United States	Georgia						Javiana (Predicted)					FDA		Javiana	D1	l,z28	1,5		9,46	l,z28	1,5	24	17	Javiana	Lineage 3		13	12	17	16	13
SAL_DA1487AA	H124500623	SAL_DA1487AA	SAL_JA0751AA_AS	PRJNA248792	SRP042645	SAMN03160369	SRS736349	2015-08-27	2014-11-10	Food	ND/Others	food	2012	11			Europe	United Kingdom	England	London				0	Javiana	I				Gastrointestinal Bacteria Reference Unit, Public Health England		Javiana	D1	l,z28	1,5	Javiana	9	l,z28	1,5	2500	17	Javiana	Lineage 3		13	12	17	16	13
SAL_DA1505AA	H120640443	SAL_DA1505AA	SAL_JA0216AA_AS	PRJNA248792	SRP042645	SAMN03160363	SRS736333	2015-08-27	2014-11-10	Human	Human	Homo sapiens; human	2012	2			Europe	United Kingdom	England	London				0	Javiana	I				Gastrointestinal Bacteria Reference Unit, Public Health England		Javiana	D1	l,z28	1,5	Javiana	9	l,z28	1,5	2744	17	Javiana	Lineage 3		13	12	17	706	13
SAL_DA1698AA	FLUFL-554	SAL_DA1698AA	SAL_FA1517AA_AS	PRJNA183848	SRP028812	SAMN03114941	SRS734921	2015-08-27	2014-10-31	Environment	Soil/Dust	sediment	2011	7			North America	United States	Georgia						Javiana (Predicted)					Food and Drug Administration - Center for Food Safety and Applied Nutrition (US)		Javiana	D1	l,z28	1,5	Javiana	9	l,z28	1,5	24	17	Javiana	Lineage 3		13	12	17	16	13
SAL_DA1727AA	FLUFL-567	SAL_DA1727AA	SAL_FA1533AA_AS	PRJNA183848	SRP028812	SAMN03114947	SRS734893	2015-08-27	2014-10-31	Environment	Soil/Dust	sediment	2011	7			North America	United States	Georgia						Javiana (Predicted)					Food and Drug Administration - Center for Food Safety and Applied Nutrition (US)		Javiana	D1	l,z28	1,5	Javiana	9	l,z28	1,5	24	17	Javiana	Lineage 3		13	12	17	16	13
SAL_DA1736AA	FLUFL-558	SAL_DA1736AA	SAL_BA4012AA_AS	PRJNA183848	SRP028812	SAMN03114944	SRS734880	2015-08-27	2014-10-31	Environment	Water/River	pond water	2011	7			North America	United States	Georgia						Javiana (Predicted)					Food and Drug Administration - Center for Food Safety and Applied Nutrition (US)		Javiana	D1	l,z28	1,5	Javiana	9	l,z28	1,5	24	17	Javiana	Lineage 3		13	12	17	16	13
SAL_DA1749AA	FLUFL-565	SAL_DA1749AA	SAL_FA1552AA_AS	PRJNA183848	SRP028812	SAMN03114946	SRS734867	2015-08-27	2014-10-31	Environment	Soil/Dust	sediment	2011	7			North America	United States	Georgia						Javiana (Predicted)					FDA		Javiana	D1	l,z28	1,5	Javiana	9	l,z28	1,5	24	17	Javiana	Lineage 3		13	12	17	16	13
SAL_DA1836AA	2014K-0802	SAL_DA1836AA	SAL_FA1579AA_AS	PRJNA230403	SRP040281	SAMN03135743	SRS733374	2015-08-27	2014-10-29	Human	Human	Age: 20-29; stool	2014	7			North America	United States							Javiana (Predicted)					Centers for Disease Control and Prevention - PulseNet		Javiana	D1	l,z28	1,5	Javiana	9	l,z28	1,5	24	17	Javiana	Lineage 3		13	12	17	16	13
SAL_DA1837AA	2014K-0801	SAL_DA1837AA	SAL_FA1577AA_AS	PRJNA230403	SRP040281	SAMN03135742	SRS733375	2015-08-27	2014-10-29	Human	Human	Age: 50-59; stool	2014	7			North America	United States							Javiana (Predicted)					PulseNet Next Generation Subtyping Methods Unit		Javiana	D1	l,z28	1,5	Javiana	9	l,z28	1,5	24	17	Javiana	Lineage 3		13	12	17	16	13
SAL_DA1838AA	2014K-0800	SAL_DA1838AA	SAL_FA1578AA_AS	PRJNA230403	SRP040281	SAMN03135741	SRS733372	2015-08-27	2014-10-29	Human	Human	Age: 50-59; stool	2014	8			North America	United States							Javiana (Predicted)					PulseNet Next Generation Subtyping Methods Unit		Javiana	D1	l,z28	1,5	Javiana	9	l,z28	1,5	24	17	Javiana	Lineage 3		13	12	17	16	13
SAL_DA1841AA	2014K-0790	SAL_DA1841AA	SAL_FA1581AA_AS	PRJNA230403	SRP040281	SAMN03135738	SRS733369	2015-08-27	2014-10-29	Human	Human	Age: 30-39; stool	2014	7			North America	United States							Javiana					PulseNet Next Generation Subtyping Methods Unit		Javiana	D1	l,z28	1,5	Javiana	9	l,z28	1,5	24	17	Javiana	Lineage 3		13	12	17	16	13
SAL_DA1842AA	2014K-0789	SAL_DA1842AA	SAL_JA0423AA_AS	PRJNA230403	SRP040281	SAMN03135737	SRS733368	2015-08-27	2014-10-29	Human	Human	Age: 20-29; stool	2014	7			North America	United States							Javiana					Center for Diease Control and Prevention - Enteric Diseases Laboratory Branch (US)		Javiana	D1	l,z28	1,5	Javiana	9	l,z28	1,5	24	17	Javiana	Lineage 3		13	12	17	16	13
SAL_DA1844AA	PNUSAS000052	SAL_DA1844AA	SAL_FA1584AA_AS	PRJNA230403	SRP040281	SAMN03074663	SRS732728	2015-08-27	2014-10-29	Human	Human	Age: 30-39; stool	2014	8			North America	United States							Javiana					Centers for Disease Control and Prevention - PulseNet		Javiana	D1	l,z28	1,5	Javiana	9	l,z28	1,5	24	17	Javiana	Lineage 3		13	12	17	16	13
SAL_DA1845AA	PNUSAS000051	SAL_DA1845AA	SAL_FA1588AA_AS	PRJNA230403	SRP040281	SAMN03074662	SRS732726	2015-08-27	2014-10-29	Human	Human	Age: 20-29; stool	2014	7			North America	United States							Javiana					PulseNet Next Generation Subtyping Methods Unit		Javiana	D1	l,z28	1,5	Javiana	9	l,z28	1,5	24	17	Javiana	Lineage 3		13	12	17	16	13
SAL_DA1855AA	FDA148629	SAL_DA1855AA	SAL_FA1592AA_AS	PRJNA186035	SRP018785	SAMN02843529	SRS732487	2015-08-27	2014-10-28	Environment	Plant	black pepper	2001	9			Asia	Indonesia							Javiana	I				Food and Drug Administration - Center for Food Safety and Applied Nutrition (US)		Javiana	D1	l,z28	1,5	Javiana	9	l,z28	1,5	1547	17	Javiana	Lineage 3		60	12	17	16	13
SAL_DA1866AA	WAPHL_SAL-A00642	SAL_DA1866AA	SAL_FA1599AA_AS	PRJNA252015	SRP047173	SAMN03097359	SRS732475	2015-08-27	2014-10-28	Human	Human	Homo sapiens; Age: 30-39	2014	6			North America	United States	Washington						Javiana	I				Food and Drug Administration - Center for Food Safety and Applied Nutrition (US)		Javiana	B	l,z28	1,5		-	l,z28	1,5	24	17	Javiana	Lineage 3		13	12	17	16	13
SAL_DA1875AA	WAPHL_SAL-A00641	SAL_DA1875AA	SAL_FA1605AA_AS	PRJNA252015	SRP047173	SAMN03097358	SRS732462	2015-08-27	2014-10-28	Human	Human	Homo sapiens; Age: 20-29; urine	2014	4			North America	United States	Washington						Javiana	I				Food and Drug Administration - Center for Food Safety and Applied Nutrition (US)		Javiana	D1	l,z28	1,5	Javiana	9	l,z28	1,5	24	17	Javiana	Lineage 3		13	12	17	16	13
SAL_DA1880AA	WAPHL_SAL-A00643	SAL_DA1880AA	SAL_FA1607AA_AS	PRJNA252015	SRP047173	SAMN03097360	SRS732454	2015-08-27	2014-10-28	Human	Human	Homo sapiens; Age: 5-9; stool	2014	9			North America	United States	Washington						Javiana	I				Food and Drug Administration - Center for Food Safety and Applied Nutrition (US)		Javiana	B	l,z28	1,5		-	l,z28	1,5	24	17	Javiana	Lineage 3		13	12	17	16	13
SAL_DA1906AA	FCC0198	SAL_DA1906AA	SAL_FA1614AA_AS	PRJNA186035	SRP018785	SAMN02678589	SRS732411	2015-08-27	2014-10-28	Environment	Plant	brazilian black pepper	2008	11			South America	Brazil							Javiana	I				FDA/CFSAN		Javiana	D1	l,z28	1,5	Javiana	9	l,z28	1,5	24	17	Javiana	Lineage 3		13	12	17	16	13
SAL_DA1994AA	VA-WGS-00336	SAL_DA1994AA	SAL_FA1672AA_AS	PRJNA219491	SRP033708	SAMN03112862	SRS726096	2015-08-27	2014-10-22	Wild Animal	Avian	seagull	2011	5			North America	United States	Virginia						Javiana	I				Food and Drug Administration - Center for Food Safety and Applied Nutrition (US)		Javiana	D1	l,z28	1,5	Javiana	9	l,z28	1,5	24	17	Javiana	Lineage 3		13	12	17	16	13
SAL_DA1995AA	VA-WGS-00335	SAL_DA1995AA	SAL_FA1674AA_AS	PRJNA219491	SRP033708	SAMN03112861	SRS726095	2015-08-27	2014-10-22	Wild Animal	Avian	seagull	2011	5			North America	United States	Virginia						Javiana	I				FDA Center for Food Safety and Applied Nutrition		Javiana	D1	l,z28	1,5	Javiana	9	l,z28	1,5	24	17	Javiana	Lineage 3		13	12	17	16	13
SAL_DA2000AA	FLUFL-427	SAL_DA2000AA	SAL_FA1678AA_AS	PRJNA183848	SRP028812	SAMN03102391	SRS726089	2015-08-27	2014-10-22	Environment	Soil/Dust	sediment	2011	6			North America	United States	Georgia						Javiana (Predicted)					Food and Drug Administration - Center for Food Safety and Applied Nutrition (US)		Javiana	D1	l,z28	1,5	Javiana	9	l,z28	1,5	24	17	Javiana	Lineage 3		13	12	17	16	13
SAL_DA2001AA	FLUFL-421	SAL_DA2001AA	SAL_FA1680AA_AS	PRJNA183848	SRP028812	SAMN03102389	SRS726088	2015-08-27	2014-10-22	Environment	Soil/Dust	sediment	2011	6			North America	United States	Georgia						Javiana (Predicted)					FDA Center for Food Safety and Applied Nutrition		Javiana	D1	l,z28	1,5	Javiana	9	l,z28	1,5	24	17	Javiana	Lineage 3		13	12	17	16	13
SAL_DA2003AA	VA-WGS-00339	SAL_DA2003AA	SAL_FA1681AA_AS	PRJNA219491	SRP033708	SAMN03112865	SRS726085	2015-08-27	2014-10-22				2011	7			North America	United States	Virginia						Javiana	I				FDA Center for Food Safety and Applied Nutrition		Javiana	D1	l,z28	1,5	Javiana	9	l,z28	1,5	24	17	Javiana	Lineage 3		13	12	17	16	13
SAL_DA2020AA	FLUFL-425	SAL_DA2020AA	SAL_FA1694AA_AS	PRJNA183848	SRP028812	SAMN03102390	SRS726067	2015-08-27	2014-10-22	Environment	Soil/Dust	sediment	2011	6			North America	United States	Georgia						Javiana (Predicted)					Food and Drug Administration - Center for Food Safety and Applied Nutrition (US)		Javiana	D1	l,z28	1,5	Javiana	9	l,z28	1,5	24	17	Javiana	Lineage 3		13	12	17	16	13
SAL_DA2162AA	FDN0013	SAL_DA2162AA	SAL_FA1809AA_AS	PRJNA186035	SRP018785	SAMN02345530	SRS724166	2015-08-27	2014-10-20	Environment	Plant	cantaloupe	2012	4			North America	Mexico							Rough:L,V:1,5					Food and Drug Administration - Center for Food Safety and Applied Nutrition (US)		Javiana	D1	l,z28	1,5	Javiana	9	l,z28	1,5	24	17	Javiana	Lineage 3		13	12	17	16	13
SAL_DA2424AA	FDA650574-41 2-1	SAL_DA2424AA	SAL_BA5432AA_AS	PRJNA186035	SRP018785	SAMN02847046	SRS717336	2015-08-27	2014-10-08	Environment	Soil/Dust	swab	2012	1			North America	United States	California						Javiana	I				Food and Drug Administration - Center for Food Safety and Applied Nutrition (US)		Javiana	D1	l,z28	1,5	Javiana	9	l,z28	1,5	24	17	Javiana	Lineage 3		13	12	17	16	13
SAL_DA2473AA	PNUSAS000055	SAL_DA2473AA	SAL_FA2006AA_AS	PRJNA230403	SRP040281	SAMN03081320	SRS715817	2015-08-27	2014-10-03	Human	Human	Age: 0-4; stool	2014	8			North America	United States							Javiana					Centers for Disease Control and Prevention - PulseNet		Javiana	D1	l,z28	1,5	Javiana	9	l,z28	1,5	24	17	Javiana	Lineage 3		13	12	17	16	13
SAL_DA2474AA	PNUSAS000054	SAL_DA2474AA	SAL_FA2008AA_AS	PRJNA230403	SRP040281	SAMN03081319	SRS715816	2015-08-27	2014-10-03	Human	Human	Age: 0-4; stool	2014	8			North America	United States							Javiana					Centers for Disease Control and Prevention - PulseNet		Javiana	D1	l,z28	1,5	Javiana	9	l,z28	1,5	24	17	Javiana	Lineage 3		13	12	17	16	13
SAL_DA2476AA	PNUSAS000050	SAL_DA2476AA	SAL_FA2009AA_AS	PRJNA230403	SRP040281	SAMN03074661	SRS715814	2015-08-27	2014-10-03	Human	Human	Age: 70-79; stool	2014	6			North America	United States							Javiana					Centers for Disease Control and Prevention - PulseNet		Javiana	D1	l,z28	1,5	Javiana	9	l,z28	1,5	24	17	Javiana	Lineage 3		13	12	17	16	13
SAL_DA2587AA	FNW19a54	SAL_DA2587AA	SAL_FA2087AA_AS	PRJNA186035	SRP018785	SAMN02678767	SRS713570	2015-08-27	2014-09-30	Environment	Plant	cantaloupe	2008	10			North America	Mexico							Javiana	I				Food and Drug Administration - Center for Food Safety and Applied Nutrition (US)		Javiana	D1	l,z28	1,5	Javiana	9	l,z28	1,5	24	17	Javiana	Lineage 3		13	12	17	16	13
SAL_DA2625AA	POR1-0005	SAL_DA2625AA	SAL_FA2112AA_AS	PRJNA183850	SRP028607	SAMN02983148	SRS711072	2015-08-27	2014-09-29	Livestock	Swine	Sus scrofa; feces	2013	8			North America	United States	Texas						Javiana	I				Food and Drug Administration - Center for Food Safety and Applied Nutrition (US)		Javiana	D1	l,z28	1,5	Javiana	9	l,z28	1,5	371	17	Javiana	Lineage 3		13	12	17	16	117
SAL_DA2730AA	PNUSAS000030	SAL_DA2730AA	SAL_BA4356AA_AS	PRJNA230403	SRP040281	SAMN03074085	SRS709174	2015-08-27	2014-09-25	Human	Human	Age: 60-69; stool					North America	United States							Javiana					PulseNet Next Generation Subtyping Methods Unit		Javiana	D1	l,z28	1,5	Javiana	9	l,z28	1,5	24	17	Javiana	Lineage 3		13	12	17	16	13
SAL_DA2848AA	PNUSAS000031	SAL_DA2848AA	SAL_FA2235AA_AS	PRJNA230403	SRP040281	SAMN03074086	SRS706627	2015-08-27	2014-09-19	Human	Human	Age: 20-29; stool					North America	United States							Javiana (Predicted)					PulseNet Next Generation Subtyping Methods Unit		Javiana	D1	l,z28	1,5	Javiana	9	l,z28	1,5	24	17	Javiana	Lineage 3		13	12	17	16	13
SAL_DA2849AA	PNUSAS000029	SAL_DA2849AA	SAL_FA2238AA_AS	PRJNA230403	SRP040281	SAMN03074084	SRS706626	2015-08-27	2014-09-19	Human	Human	Age: 10-19; stool					North America	United States							Javiana (Predicted)					PulseNet Next Generation Subtyping Methods Unit		Javiana	D1	l,z28	1,5	Javiana	9	l,z28	1,5	24	17	Javiana	Lineage 3		13	12	17	16	13
SAL_DA2850AA	PNUSAS000028	SAL_DA2850AA	SAL_FA2239AA_AS	PRJNA230403	SRP040281	SAMN03074083	SRS706625	2015-08-27	2014-09-19	Human	Human	Age: 5-9; stool					North America	United States							Javiana (Predicted)					PulseNet Next Generation Subtyping Methods Unit		Javiana	D1	l,z28	1,5	Javiana	9	l,z28	1,5	24	17	Javiana	Lineage 3		13	12	17	16	13
SAL_DA2974AA	2014K-0704	SAL_DA2974AA	SAL_FA2321AA_AS	PRJNA230403	SRP040281	SAMN03067531	SRS702607	2015-08-27	2014-09-17								North America	United States							Javiana (Predicted)					PulseNet Next Generation Subtyping Methods Unit		Javiana	D1	l,z28	1,5	Javiana	9	l,z28	1,5	24	17	Javiana	Lineage 3		13	12	17	16	13
SAL_DA2975AA	2014K-0703	SAL_DA2975AA	SAL_FA2323AA_AS	PRJNA230403	SRP040281	SAMN03067532	SRS702606	2015-08-27	2014-09-17	Human	Human	Age: 40-49; stool	2014	7			North America	United States							Javiana (Predicted)					Center for Diease Control and Prevention - Enteric Diseases Laboratory Branch (US)		Javiana	D1	l,z28	1,5	Javiana	9	l,z28	1,5	24	17	Javiana	Lineage 3		13	12	17	16	13
SAL_DA2976AA	2014K-0702	SAL_DA2976AA	SAL_FA2322AA_AS	PRJNA230403	SRP040281	SAMN03067533	SRS702605	2015-08-27	2014-09-17	Human	Human	Age: 70-79; stool	2014	7			North America	United States							Javiana (Predicted)					Centers for Disease Control and Prevention - PulseNet		Javiana	D1	l,z28	1,5	Javiana	9	l,z28	1,5	24	17	Javiana	Lineage 3		13	12	17	16	13
SAL_DA2993AA	CFSAN024150	SAL_DA2993AA	SAL_FA2337AA_AS	PRJNA186035	SRP018785	SAMN03069634	SRS702220	2015-08-27	2014-09-17	Environment	Water/River	water	2014	6			North America	United States	Virginia						Javiana (Predicted)					FDA Center for Food Safety and Applied Nutrition		Javiana	D1	l,z28	1,5	Javiana	9	l,z28	1,5	24	17	Javiana	Lineage 3		13	12	17	16	13
SAL_DA2994AA	CFSAN024194	SAL_DA2994AA	SAL_JA0245AA_AS	PRJNA186035	SRP018785	SAMN03069678	SRS702219	2015-08-27	2014-09-17	Environment	Water/River	water (10 gal)	2014	7			North America	United States	Virginia						Javiana (Predicted)					Food and Drug Administration - Center for Food Safety and Applied Nutrition (US)		Javiana	D1	l,z28	1,5	Javiana	9	l,z28	1,5	24	17	Javiana	Lineage 3		13	12	17	16	13
SAL_DA3031AA	CFSAN024133	SAL_DA3031AA	SAL_FA2368AA_AS	PRJNA186035	SRP018785	SAMN03069617	SRS701819	2015-08-27	2014-09-16	Environment	Water/River	water	2014	6			North America	United States	Virginia						Javiana (Predicted)					FDA Center for Food Safety and Applied Nutrition		Javiana	D1	l,z28	1,5	Javiana	9	l,z28	1,5	24	17	Javiana	Lineage 3		13	12	17	16	13
SAL_DA3034AA	CFSAN024154	SAL_DA3034AA	SAL_BA4174AA_AS	PRJNA186035	SRP018785	SAMN03069638	SRS701816	2015-08-27	2014-09-16	Environment	Water/River	water	2014	6			North America	United States	Virginia						Javiana (Predicted)					FDA Center for Food Safety and Applied Nutrition		Javiana	D1	l,z28	1,5	Javiana	9	l,z28	1,5	24	17	Javiana	Lineage 3		13	12	17	16	13
SAL_DA3042AA	CFSAN024151	SAL_DA3042AA	SAL_FA2376AA_AS	PRJNA186035	SRP018785	SAMN03069635	SRS701807	2015-08-27	2014-09-16	Environment	Water/River	water	2014	6			North America	United States	Virginia						Javiana (Predicted)					FDA Center for Food Safety and Applied Nutrition		Javiana	D1	l,z28	1,5	Javiana	9	l,z28	1,5	24	17	Javiana	Lineage 3		13	12	17	16	13
SAL_DA3043AA	CFSAN024135	SAL_DA3043AA	SAL_CA2142AA_AS	PRJNA186035	SRP018785	SAMN03069619	SRS701806	2015-08-27	2014-09-16	Environment	Water/River	water	2014	6			North America	United States	Virginia						Javiana (Predicted)					FDA Center for Food Safety and Applied Nutrition		Javiana	D1	l,z28	1,5	Javiana	9	l,z28	1,5	24	17	Javiana	Lineage 3		13	12	17	16	13
SAL_DA3048AA	CFSAN024179	SAL_DA3048AA	SAL_FA2380AA_AS	PRJNA186035	SRP018785	SAMN03069663	SRS701801	2015-08-27	2014-09-16	Environment	Water/River	water (10 gal)	2014	7			North America	United States	Virginia						Javiana (Predicted)					Food and Drug Administration - Center for Food Safety and Applied Nutrition (US)		Javiana	D1	l,z28	1,5	Javiana	9	l,z28	1,5	24	17	Javiana	Lineage 3		13	12	17	16	13
SAL_DA3053AA	CFSAN024191	SAL_DA3053AA	SAL_JA0950AA_AS	PRJNA186035	SRP018785	SAMN03069675	SRS701796	2015-08-27	2014-09-16	Environment	Water/River	water (10 gal)	2014	7			North America	United States	Virginia						Javiana (Predicted)					FDA Center for Food Safety and Applied Nutrition		Javiana	D1	l,z28	1,5	Javiana	9	l,z28	1,5	24	17	Javiana	Lineage 3		13	12	17	16	13
SAL_DA3058AA	CFSAN024181	SAL_DA3058AA	SAL_FA2389AA_AS	PRJNA186035	SRP018785	SAMN03069665	SRS701791	2015-08-27	2014-09-16	Environment	Water/River	water (10 gal)	2014	7			North America	United States	Virginia						Javiana (Predicted)					FDA Center for Food Safety and Applied Nutrition		Javiana	D1	l,z28	1,5	Javiana	9	l,z28	1,5	24	17	Javiana	Lineage 3		13	12	17	16	13
SAL_DA3060AA	CFSAN024186	SAL_DA3060AA	SAL_FA2390AA_AS	PRJNA186035	SRP018785	SAMN03069670	SRS701788	2015-08-27	2014-09-16	Environment	Water/River	water (10 gal)	2014	7			North America	United States	Virginia						Javiana (Predicted)					Food and Drug Administration - Center for Food Safety and Applied Nutrition (US)		Javiana	D1	l,z28	1,5	Javiana	9	l,z28	1,5	24	17	Javiana	Lineage 3		13	12	17	16	13
SAL_DA3062AA	CFSAN024221	SAL_DA3062AA	SAL_JA1082AA_AS	PRJNA186035	SRP018785	SAMN03069705	SRS701786	2015-08-27	2014-09-16	Environment	Soil/Dust	sediment	2014	7			North America	United States	Virginia						Javiana (Predicted)					FDA Center for Food Safety and Applied Nutrition		Javiana	D1	l,z28	1,5	Javiana	9	l,z28	1,5	24	17	Javiana	Lineage 3		13	12	17	16	13
SAL_DA3063AA	CFSAN024177	SAL_DA3063AA	SAL_FA2396AA_AS	PRJNA186035	SRP018785	SAMN03069661	SRS701785	2015-08-27	2014-09-16	Environment	Water/River	water (10 gal)	2014	7			North America	United States	Virginia						Javiana (Predicted)					Food and Drug Administration - Center for Food Safety and Applied Nutrition (US)		Javiana	D1	l,z28	1,5	Javiana	9	l,z28	1,5	24	17	Javiana	Lineage 3		13	12	17	16	13
SAL_DA3079AA	CFSAN024209	SAL_DA3079AA	SAL_FA2409AA_AS	PRJNA186035	SRP018785	SAMN03069693	SRS701767	2015-08-27	2014-09-16	Environment	Water/River	water (10 gal)	2014	7			North America	United States	Virginia						Javiana (Predicted)					FDA Center for Food Safety and Applied Nutrition		Javiana	D1	l,z28	1,5	Javiana	9	l,z28	1,5	24	17	Javiana	Lineage 3		13	12	17	16	13
SAL_DA3080AA	CFSAN024180	SAL_DA3080AA	SAL_FA2408AA_AS	PRJNA186035	SRP018785	SAMN03069664	SRS701765	2015-08-27	2014-09-16	Environment	Water/River	water (10 gal)	2014	7			North America	United States	Virginia						Javiana (Predicted)					FDA Center for Food Safety and Applied Nutrition		Javiana	D1	l,z28	1,5	Javiana	9	l,z28	1,5	24	17	Javiana	Lineage 3		13	12	17	16	13
SAL_DA3094AA	CFSAN024187	SAL_DA3094AA	SAL_FA2422AA_AS	PRJNA186035	SRP018785	SAMN03069671	SRS701700	2015-08-27	2014-09-16	Environment	Water/River	water (10 gal)	2014	7			North America	United States	Virginia						Javiana (Predicted)					Food and Drug Administration - Center for Food Safety and Applied Nutrition (US)		Javiana	D1	l,z28	1,5	Javiana	9	l,z28	1,5	24	17	Javiana	Lineage 3		13	12	17	16	13
SAL_DA3095AA	CFSAN024149	SAL_DA3095AA	SAL_FA2424AA_AS	PRJNA186035	SRP018785	SAMN03069633	SRS701699	2015-08-27	2014-09-16	Environment	Water/River	water	2014	6			North America	United States	Virginia						Javiana (Predicted)					FDA Center for Food Safety and Applied Nutrition		Javiana	D1	l,z28	1,5	Javiana	9	l,z28	1,5	24	17	Javiana	Lineage 3		13	12	17	16	13
SAL_DA3097AA	CFSAN024220	SAL_DA3097AA	SAL_FA2425AA_AS	PRJNA186035	SRP018785	SAMN03069704	SRS701696	2015-08-27	2014-09-16	Environment	Soil/Dust	sediment	2014	7			North America	United States	Virginia						Javiana (Predicted)					Food and Drug Administration - Center for Food Safety and Applied Nutrition (US)		Javiana	D1	-	1,5	Javiana	9	l,z28	1,5	24	17	Javiana	Lineage 3		13	12	17	16	13
SAL_DA3100AA	CFSAN024134	SAL_DA3100AA	SAL_JA0829AA_AS	PRJNA186035	SRP018785	SAMN03069618	SRS701694	2015-08-27	2014-09-16	Environment	Water/River	water	2014	6			North America	United States	Virginia						Javiana (Predicted)					FDA Center for Food Safety and Applied Nutrition		Javiana	D1	l,z28	1,5	Javiana	9	l,z28	1,5	24	17	Javiana	Lineage 3		13	12	17	16	13
SAL_DA3102AA	CFSAN024147	SAL_DA3102AA	SAL_FA2429AA_AS	PRJNA186035	SRP018785	SAMN03069631	SRS701692	2015-08-27	2014-09-16	Environment	Water/River	water	2014	6			North America	United States	Virginia						Javiana (Predicted)					FDA Center for Food Safety and Applied Nutrition		Javiana	D1	l,z28	1,5	Javiana	9	l,z28	1,5	24	17	Javiana	Lineage 3		13	12	17	16	13
SAL_DA3103AA	CFSAN024231	SAL_DA3103AA	SAL_FA2431AA_AS	PRJNA186035	SRP018785	SAMN03069715	SRS701690	2015-08-27	2014-09-16	Environment	Soil/Dust	sediment	2014	7			North America	United States	Virginia						Javiana (Predicted)					FDA Center for Food Safety and Applied Nutrition		Javiana	D1	l,z28	1,5	Javiana	9	l,z28	1,5	24	17	Javiana	Lineage 3		13	12	17	16	13
SAL_DA3105AA	CFSAN024213	SAL_DA3105AA	SAL_JA1069AA_AS	PRJNA186035	SRP018785	SAMN03069697	SRS701688	2015-08-27	2014-09-16	Environment	Water/River	water (10 gal)	2014	7			North America	United States	Virginia						Javiana (Predicted)					FDA Center for Food Safety and Applied Nutrition		Javiana	D1	l,z28	1,5	Javiana	9	l,z28	1,5	24	17	Javiana	Lineage 3		13	12	17	16	13
SAL_DA3108AA	CFSAN024136	SAL_DA3108AA	SAL_FA2434AA_AS	PRJNA186035	SRP018785	SAMN03069620	SRS701685	2015-08-27	2014-09-16	Environment	Water/River	water	2014	6			North America	United States	Virginia						Javiana (Predicted)					FDA Center for Food Safety and Applied Nutrition		Javiana	D1	l,z28	1,5	Javiana	9	l,z28	1,5	24	17	Javiana	Lineage 3		13	12	17	16	13
SAL_DA3114AA	CFSAN024132	SAL_DA3114AA	SAL_FA2439AA_AS	PRJNA186035	SRP018785	SAMN03069616	SRS701679	2015-08-27	2014-09-16	Environment	Water/River	water	2014	6			North America	United States	Virginia						Javiana (Predicted)					FDA Center for Food Safety and Applied Nutrition		Javiana	D1	l,z28	1,5	Javiana	9	l,z28	1,5	24	17	Javiana	Lineage 3		13	12	17	16	13
SAL_DA3115AA	CFSAN024224	SAL_DA3115AA	SAL_BA4754AA_AS	PRJNA186035	SRP018785	SAMN03069708	SRS701678	2015-08-27	2014-09-16	Environment	Soil/Dust	sediment	2014	7			North America	United States	Virginia						Javiana (Predicted)					FDA Center for Food Safety and Applied Nutrition		Javiana	D1	l,z28	1,5	Javiana	9	l,z28	1,5	24	17	Javiana	Lineage 3		13	12	17	16	13
SAL_DA3117AA	CFSAN024193	SAL_DA3117AA	SAL_BA5173AA_AS	PRJNA186035	SRP018785	SAMN03069677	SRS701676	2015-08-27	2014-09-16	Environment	Water/River	water (10 gal)	2014	7			North America	United States	Virginia						Javiana (Predicted)					FDA Center for Food Safety and Applied Nutrition		Javiana	D1	l,z28	1,5	Javiana	9	l,z28	1,5	24	17	Javiana	Lineage 3		13	12	17	16	13
SAL_DA3118AA	CFSAN024182	SAL_DA3118AA	SAL_FA2440AA_AS	PRJNA186035	SRP018785	SAMN03069666	SRS701675	2015-08-27	2014-09-16	Environment	Water/River	water (10 gal)	2014	7			North America	United States	Virginia						Javiana (Predicted)					FDA Center for Food Safety and Applied Nutrition		Javiana	D1	l,z28	1,5	Javiana	9	l,z28	1,5	24	17	Javiana	Lineage 3		13	12	17	16	13
SAL_DA3122AA	CFSAN024178	SAL_DA3122AA	SAL_FA2443AA_AS	PRJNA186035	SRP018785	SAMN03069662	SRS701671	2015-08-27	2014-09-16	Environment	Water/River	water (10 gal)	2014	7			North America	United States	Virginia						Javiana (Predicted)					FDA Center for Food Safety and Applied Nutrition		Javiana	D1	l,z28	1,5	Javiana	9	l,z28	1,5	24	17	Javiana	Lineage 3		13	12	17	16	13
SAL_DA3123AA	CFSAN024165	SAL_DA3123AA	SAL_FA2445AA_AS	PRJNA186035	SRP018785	SAMN03069649	SRS701670	2015-08-27	2014-09-16	Environment	Water/River	water	2014	6			North America	United States	Virginia						Javiana (Predicted)					FDA Center for Food Safety and Applied Nutrition		Javiana	D1	l,z28	1,5	Javiana	9	l,z28	1,5	24	17	Javiana	Lineage 3		13	12	17	16	13
SAL_DA3127AA	CFSAN024211	SAL_DA3127AA	SAL_FA2446AA_AS	PRJNA186035	SRP018785	SAMN03069695	SRS701665	2015-08-27	2014-09-16	Environment	Water/River	water (10 gal)	2014	7			North America	United States	Virginia						Javiana (Predicted)					FDA Center for Food Safety and Applied Nutrition		Javiana	D1	l,z28	1,5	Javiana	9	l,z28	1,5	24	17	Javiana	Lineage 3		13	12	17	16	13
SAL_DA3129AA	CFSAN024131	SAL_DA3129AA	SAL_FA2447AA_AS	PRJNA186035	SRP018785	SAMN03069615	SRS701663	2015-08-27	2014-09-16	Environment	Water/River	water	2014	6			North America	United States	Virginia						Javiana (Predicted)					FDA Center for Food Safety and Applied Nutrition		Javiana	D1	l,z28	1,5	Javiana	9	l,z28	1,5	24	17	Javiana	Lineage 3		13	12	17	16	13
SAL_DA3142AA	OSF023663	SAL_DA3142AA	SAL_FA2455AA_AS	PRJNA186035	SRP018785	SAMN03002085	SRS701602	2015-08-27	2014-09-16				2006	10			North America	United States	Washington						Javiana (Predicted)					FDA/CFSAN		Javiana	D1	l,z28	1,5	Javiana	9	l,z28	1,5	1674	17	Javiana	Lineage 3		13	12	17	520	13
SAL_DA3320AA	CFSAN023351	SAL_DA3320AA	SAL_FA2535AA_AS	PRJNA186035	SRP018785	SAMN02989067	SRS699120	2015-08-27	2014-09-10	Human	Human	Homo sapiens; feces	2012	8			North America	United States	Minnesota						Javiana (Predicted)	I				FDA/CFSAN		Javiana	D1	l,z28	1,5	Javiana	9	l,z28	1,5	2783	17	Javiana	Lineage 3		13	12	17	16	117
SAL_DA3441AA	CFSAN023358	SAL_DA3441AA	SAL_FA2559AA_AS	PRJNA183847	SRP028894	SAMN02989074	SRS697263	2015-08-27	2014-09-08	Human	Human	Homo sapiens; feces	2012	10			North America	United States	Minnesota						Javiana	I				Food and Drug Administration - Center for Food Safety and Applied Nutrition (US)		Javiana	D1	l,z28	1,5	Javiana	9	l,z28	1,5	24	17	Javiana	Lineage 3		13	12	17	16	13
SAL_DA3470AA	CFSAN023357	SAL_DA3470AA	SAL_FA2573AA_AS	PRJNA183850	SRP028607	SAMN02989073	SRS697235	2015-08-27	2014-09-08	Food	Avian	Homo sapiens; turkey jerky	2012	8			North America	United States	Minnesota						Javiana (Predicted)	I				Food and Drug Administration - Center for Food Safety and Applied Nutrition (US)		Javiana	D1	l,z28	1,5	Javiana	9	l,z28	1,5	2783	17	Javiana	Lineage 3		13	12	17	16	117
SAL_DA3471AA	CFSAN023356	SAL_DA3471AA	SAL_FA2575AA_AS	PRJNA215333	SRP032981	SAMN02989072	SRS697234	2015-08-27	2014-09-08	Food	Avian	Homo sapiens; turkey jerky	2012	8			North America	United States	Minnesota						Javiana (Predicted)	I				FDA/CFSAN		Javiana	D1	l,z28	1,5	Javiana	9	l,z28	1,5	2783	17	Javiana	Lineage 3		13	12	17	16	117
SAL_DA3494AA	CFSAN023353	SAL_DA3494AA	SAL_JA0408AA_AS	PRJNA186035	SRP018785	SAMN02989069	SRS697210	2015-08-27	2014-09-08	Human	Human	Homo sapiens; feces	2012	8			North America	United States	Minnesota						Javiana (Predicted)	I				FDA/CFSAN		Javiana	D1	l,z28	1,5	Javiana	9	l,z28	1,5	2783	17	Javiana	Lineage 3		13	12	17	16	117
SAL_DA3508AA	CFSAN023355	SAL_DA3508AA	SAL_FA2592AA_AS	PRJNA215333	SRP032981	SAMN02989071	SRS697195	2015-08-27	2014-09-08	Human	Human	Homo sapiens; feces	2012	8			North America	United States	Minnesota						Javiana (Predicted)	I				FDA/CFSAN		Javiana	D1	l,z28	1,5	Javiana	9	l,z28	1,5	2783	17	Javiana	Lineage 3		13	12	17	16	117
SAL_DA3549AA	CFSAN023352	SAL_DA3549AA	SAL_FA2606AA_AS	PRJNA183847	SRP028894	SAMN02989068	SRS697142	2015-08-27	2014-09-08	Human	Human	Homo sapiens; feces	2012	8			North America	United States	Minnesota						Javiana (Predicted)	I				Food and Drug Administration - Center for Food Safety and Applied Nutrition (US)		Javiana	D1	l,z28	1,5	Javiana	9	l,z28	1,5	2783	17	Javiana	Lineage 3		13	12	17	16	117
SAL_DA3589AA	CFSAN008898	SAL_DA3589AA	SAL_FA2637AA_AS	PRJNA186035	SRP018785	SAMN02900329	SRS695813	2015-08-27	2014-09-05	Environment	Water/River	water	2012	5			North America	United States	Virginia						Javiana (Predicted)	I				FDA/CFSAN		Javiana	D1	l,z28	1,5	Javiana	9	l,z28	1,5	24	17	Javiana	Lineage 3		13	12	17	16	13
SAL_DA3599AA	CFSAN008927	SAL_DA3599AA	SAL_FA2646AA_AS	PRJNA186035	SRP018785	SAMN02900358	SRS695757	2015-08-27	2014-09-05	Environment	Water/River	water	2012	5			North America	United States	Virginia						Javiana (Predicted)	I				FDA/CFSAN		Javiana	D1	l,z28	1,5	Javiana	9	l,z28	1,5	24	17	Javiana	Lineage 3		13	12	17	16	13
SAL_DA3616AA	CFSAN008880	SAL_DA3616AA	SAL_FA7417AA_AS	PRJNA186035	SRP018785	SAMN02900311	SRS695719	2015-08-27	2014-09-05	Environment	Soil/Dust	sediment	2012	10			North America	United States	Virginia						Javiana	I				Food and Drug Administration - Center for Food Safety and Applied Nutrition (US)		Javiana	D1	l,z28	1,5	Javiana	9	l,z28	1,5	24	17	Javiana	Lineage 3		13	12	17	16	13
SAL_DA3633AA	CFSAN008874	SAL_DA3633AA	SAL_FA2677AA_AS	PRJNA186035	SRP018785	SAMN02900305	SRS695671	2015-08-27	2014-09-05	Environment	Soil/Dust	sediment	2012	10			North America	United States	Virginia						Javiana	I				Food and Drug Administration - Center for Food Safety and Applied Nutrition (US)		Javiana	D1	l,z28	1,5	Javiana	9	l,z28	1,5	24	17	Javiana	Lineage 3		13	12	17	16	13
SAL_DA3639AA	CFSAN008899	SAL_DA3639AA	SAL_CA2382AA_AS	PRJNA186035	SRP018785	SAMN02900330	SRS695656	2015-08-27	2014-09-05	Environment	Water/River	water	2012	5			North America	United States	Virginia						Javiana (Predicted)	I				FDA/CFSAN		Javiana	D1	l,z28	1,5	Javiana	9	l,z28	1,5	24	17	Javiana	Lineage 3		13	12	17	16	13
SAL_DA3643AA	CFSAN008901	SAL_DA3643AA	SAL_BA4116AA_AS	PRJNA186035	SRP018785	SAMN02900332	SRS695637	2015-08-27	2014-09-05	Environment	Water/River	water	2012	5			North America	United States	Virginia						Javiana (Predicted)	I				Food and Drug Administration - Center for Food Safety and Applied Nutrition (US)		Javiana	D1	l,z28	1,5	Javiana	9	l,z28	1,5	24	17	Javiana	Lineage 3		13	12	17	16	13
SAL_DA3647AA	CFSAN008928	SAL_DA3647AA	SAL_FA2684AA_AS	PRJNA186035	SRP018785	SAMN02900359	SRS695163	2015-08-27	2014-09-05	Environment	Water/River	water	2012	5			North America	United States	Virginia						Javiana (Predicted)	I				FDA/CFSAN		Javiana	D1	l,z28	1,5	Javiana	9	l,z28	1,5	24	17	Javiana	Lineage 3		13	12	17	16	13
SAL_DA3649AA	CFSAN008872	SAL_DA3649AA	SAL_JA0481AA_AS	PRJNA186035	SRP018785	SAMN02900303	SRS695160	2015-08-27	2014-09-05	Environment	Soil/Dust	sediment	2012	10			North America	United States	Virginia						Javiana	I				FDA/CFSAN		Javiana	D1	l,z28	1,5	Javiana	9	l,z28	1,5	24	17	Javiana	Lineage 3		13	12	17	16	13
SAL_DA3652AA	CFSAN008897	SAL_DA3652AA	SAL_FA2691AA_AS	PRJNA186035	SRP018785	SAMN02900328	SRS695159	2015-08-27	2014-09-05	Environment	Water/River	water	2012	5			North America	United States	Virginia						Javiana (Predicted)	I				FDA/CFSAN		Javiana	D1	l,z28	1,5	Javiana	9	l,z28	1,5	24	17	Javiana	Lineage 3		13	12	17	16	13
SAL_DA3675AA	CFSAN008896	SAL_DA3675AA	SAL_FA2710AA_AS	PRJNA186035	SRP018785	SAMN02900327	SRS695076	2015-08-27	2014-09-05	Environment	Water/River	water	2012	5			North America	United States	Virginia						Javiana (Predicted)	I				FDA/CFSAN		Javiana	D1	l,z28	1,5	Javiana	9	l,z28	1,5	24	17	Javiana	Lineage 3		13	12	17	16	13
SAL_DA3694AA	CFSAN008879	SAL_DA3694AA	SAL_BA5295AA_AS	PRJNA186035	SRP018785	SAMN02900310	SRS695005	2015-08-27	2014-09-05	Environment	Soil/Dust	sediment	2012	10			North America	United States	Virginia						Javiana	I				Food and Drug Administration - Center for Food Safety and Applied Nutrition (US)		Javiana	D1	l,z28	1,5	Javiana	9	l,z28	1,5	24	17	Javiana	Lineage 3		13	12	17	16	13
SAL_DA3702AA	CFSAN008895	SAL_DA3702AA	SAL_FA2729AA_AS	PRJNA186035	SRP018785	SAMN02900326	SRS694996	2015-08-27	2014-09-05	Environment	Water/River	water	2012	5			North America	United States	Virginia						Javiana (Predicted)	I				FDA/CFSAN		Javiana	D1	l,z28	1,5	Javiana	9	l,z28	1,5	24	17	Javiana	Lineage 3		13	12	17	16	13
SAL_DA3712AA	CFSAN008860	SAL_DA3712AA	SAL_FA2735AA_AS	PRJNA186035	SRP018785	SAMN02900292	SRS694986	2015-08-27	2014-09-05	Environment	Water/River	water	2012	10			North America	United States	Virginia						Javiana	I				Food and Drug Administration - Center for Food Safety and Applied Nutrition (US)		Javiana	D1	l,z28	1,5	Javiana	9	l,z28	1,5	24	17	Javiana	Lineage 3		13	12	17	16	13
SAL_DA3746AA	CFSAN008878	SAL_DA3746AA	SAL_JA0298AA_AS	PRJNA186035	SRP018785	SAMN02900309	SRS694937	2015-08-27	2014-09-05	Environment	Soil/Dust	sediment	2012	10			North America	United States	Virginia						Javiana	I				Food and Drug Administration - Center for Food Safety and Applied Nutrition (US)		Javiana	D1	l,z28	1,5	Javiana	9	l,z28	1,5	24	17	Javiana	Lineage 3		13	12	17	16	13
SAL_DA3762AA	CFSAN008929	SAL_DA3762AA	SAL_FA2778AA_AS	PRJNA186035	SRP018785	SAMN02900360	SRS694914	2015-08-27	2014-09-05	Environment	Water/River	water	2012	5			North America	United States	Virginia						Javiana (Predicted)	I				FDA/CFSAN		Javiana	D1	l,z28	1,5	Javiana	9	l,z28	1,5	24	17	Javiana	Lineage 3		13	12	17	16	13
SAL_DA3944AA	FCC0212	SAL_DA3944AA	SAL_FA2879AA_AS	PRJNA186035	SRP018785	SAMN02678600	SRS692022	2015-08-27	2014-08-28	Environment	Plant	cucumbers, fresh	2008	9			North America	Mexico							Javiana	I				Food and Drug Administration - Center for Food Safety and Applied Nutrition (US)		Javiana	D1	l,z28	1,5	Javiana	9	l,z28	1,5	24	17	Javiana	Lineage 3		13	12	17	16	13
SAL_DA3947AA	FCC0214	SAL_DA3947AA	SAL_BA2782AA_AS	PRJNA186035	SRP018785	SAMN02678602	SRS692019	2015-08-27	2014-08-28	Aquatic Animal	Shellfish	lobster, frozen	2008	9			Asia	Indonesia							Javiana	I				Food and Drug Administration - Center for Food Safety and Applied Nutrition (US)		Javiana	D1	l,z28	1,5	Javiana	9	l,z28	1,5	1547	17	Javiana	Lineage 3		60	12	17	16	13
SAL_DA3961AA	FNE0151	SAL_DA3961AA	SAL_FA2889AA_AS	PRJNA186035	SRP018785	SAMN02698319	SRS691511	2015-08-27	2014-08-27	Environment	Plant	romaine lettuce	2013	5			North America	United States	New Jersey						Javiana	I				Food and Drug Administration - Center for Food Safety and Applied Nutrition (US)		Javiana	D1	l,z28	1,5	Javiana	9	l,z28	1,5	24	17	Javiana	Lineage 3		13	12	17	16	13
SAL_DA5108AA	FCC0135	SAL_DA5108AA	SAL_BA4096AA_AS	PRJNA186035	SRP018785	SAMN02678541	SRS679284	2015-08-27	2014-08-11	Food	Plant	cumin	2012	10	17		North America	United States	Ohio						Javiana	I				Food and Drug Administration - Center for Food Safety and Applied Nutrition (US)		Javiana	D1	l,z28	1,5	Javiana	9	l,z28	1,5	2251	17	Javiana	Lineage 3		13	481	17	16	13
SAL_DA5180AA	FSF0153	SAL_DA5180AA	SAL_BA5243AA_AS	PRJNA186035	SRP018785	SAMN02698115	SRS676963	2015-08-27	2014-08-08	Environment	Plant	green onion	2009	7			North America	Mexico							Javiana	I				Food and Drug Administration - Center for Food Safety and Applied Nutrition (US)		Javiana	D1	l,z28	1,5	Javiana	9	l,z28	1,5	24	17	Javiana	Lineage 3		13	12	17	16	13
SAL_DA5257AA	FDA142083-1	SAL_DA5257AA	SAL_FA3534AA_AS	PRJNA186035	SRP018785	SAMN02845033	SRS673191	2015-08-27	2014-08-04	Aquatic Animal	Fish	frozen spiny eel	2001	7			Asia	Vietnam							Javiana	I				Food and Drug Administration - Center for Food Safety and Applied Nutrition (US)		Javiana	D1	l,z28	1,5	Javiana	9	l,z28	1,5	1547	17	Javiana	Lineage 3		60	12	17	16	13
SAL_DA5817AA	FNW19a47	SAL_DA5817AA	SAL_FA3818AA_AS	PRJNA186035	SRP018785	SAMN02678761	SRS655693	2015-08-27	2014-07-09	Environment	Plant	cantaloupe	2008	10			North America	Mexico							Javiana	I				Food and Drug Administration - Center for Food Safety and Applied Nutrition (US)		Javiana	D1	l,z28	1,5	Javiana	9	l,z28	1,5	2816	17	Javiana	Lineage 3		587	12	17	16	13
SAL_DA5827AA	FNW19a26	SAL_DA5827AA	SAL_FA3828AA_AS	PRJNA186035	SRP018785	SAMN02678754	SRS655658	2015-08-27	2014-07-09	Environment	Plant	jalapeno peppers	2008	7			North America	Mexico							Javiana	I				Food and Drug Administration - Center for Food Safety and Applied Nutrition (US)		Javiana	D1	l,z28	1,5	Javiana	9	l,z28	1,5	24	17	Javiana	Lineage 3		13	12	17	16	13
SAL_DA5835AA	2014K-0220	SAL_DA5835AA	SAL_BA2661AA_AS	PRJNA230403	SRP040281	SAMN02902445	SRS655484	2015-08-27	2014-07-08	Human	Human	Age: 70-79; stool					North America	United States							Javiana					CDC		Javiana	D1	l,z28	1,5	Javiana	9	l,z28	1,5	24	17	Javiana	Lineage 3		13	12	17	16	13
SAL_DA5836AA	2014K-0219	SAL_DA5836AA	SAL_BA5738AA_AS	PRJNA230403	SRP040281	SAMN02902444	SRS655482	2015-08-27	2014-07-08	Human	Human	Age: 5-9; stool					North America	United States							Javiana					CDC		Javiana	D1	l,z28	1,5	Javiana	9	l,z28	1,5	24	17	Javiana	Lineage 3		13	12	17	16	13
SAL_DA5837AA	2014K-0218	SAL_DA5837AA	SAL_BA2573AA_AS	PRJNA230403	SRP040281	SAMN02902443	SRS655483	2015-08-27	2014-07-08	Human	Human	Age: 5-9; stool					North America	United States							Javiana					CDC		Javiana	D1	l,z28	1,5	Javiana	9	l,z28	1,5	24	17	Javiana	Lineage 3		13	12	17	16	13
SAL_DA5838AA	2014K-0217	SAL_DA5838AA	SAL_FA3836AA_AS	PRJNA230403	SRP040281	SAMN02902442	SRS655481	2015-08-27	2014-07-08	Human	Human	Age: 0-4; stool					North America	United States							Javiana					Centers for Disease Control and Prevention - PulseNet		Javiana	D1	l,z28	1,5	Javiana	9	l,z28	1,5	24	17	Javiana	Lineage 3		13	12	17	16	13
SAL_DA5839AA	2013K-0122	SAL_DA5839AA	SAL_FA3835AA_AS	PRJNA230403	SRP040281	SAMN02902441	SRS655480	2015-08-27	2014-07-08	Human	Human	Age: 20-29; stool	2012	12			North America	United States							Javiana					CDC		Javiana	D1	l,z28	1,5	Javiana	9	l,z28	1,5	24	17	Javiana	Lineage 3		13	12	17	16	13
SAL_DA5840AA	2013K-0121	SAL_DA5840AA	SAL_FA3837AA_AS	PRJNA230403	SRP040281	SAMN02902440	SRS655479	2015-08-27	2014-07-08	Human	Human	Age: 20-29; stool	2012	12			North America	United States							Javiana					CDC		Javiana	D1	l,z28	1,5	Javiana	9	l,z28	1,5	24	17	Javiana	Lineage 3		13	12	17	16	13
SAL_DA5841AA	2013K-0120	SAL_DA5841AA	SAL_FA3839AA_AS	PRJNA230403	SRP040281	SAMN02902439	SRS655478	2015-08-27	2014-07-08	Human	Human	Age: 10-19; stool	2012	12			North America	United States							Javiana					Centers for Disease Control and Prevention - PulseNet		Javiana	D1	l,z28	1,5	Javiana	9	l,z28	1,5	24	17	Javiana	Lineage 3		13	12	17	16	13
SAL_DA5842AA	2013K-0119	SAL_DA5842AA	SAL_FA3838AA_AS	PRJNA230403	SRP040281	SAMN02902438	SRS655477	2015-08-27	2014-07-08	Human	Human	Age: 20-29; stool	2012	12			North America	United States							Javiana (Predicted)					CDC		Javiana	D1	l,z28	1,5	Javiana	9	l,z28	1,5	24	17	Javiana	Lineage 3		13	12	17	16	13
SAL_DA5843AA	2013K-0118	SAL_DA5843AA	SAL_FA3840AA_AS	PRJNA230403	SRP040281	SAMN02902437	SRS655476	2015-08-27	2014-07-08	Human	Human	Age: 20-29; stool	2012	12			North America	United States							Javiana (Predicted)					CDC		Javiana	D1	l,z28	1,5	Javiana	9	l,z28	1,5	24	17	Javiana	Lineage 3		13	12	17	16	13
SAL_DA5844AA	2013K-0116	SAL_DA5844AA	SAL_FA3842AA_AS	PRJNA230403	SRP040281	SAMN02902436	SRS655475	2015-08-27	2014-07-08	Human	Human	Age: 50-59; stool	2012	12			North America	United States							Javiana (Predicted)					CDC		Javiana	D1	l,z28	1,5	Javiana	9	l,z28	1,5	24	17	Javiana	Lineage 3		13	12	17	16	13
SAL_DA5845AA	2013K-0111	SAL_DA5845AA	SAL_BA4667AA_AS	PRJNA230403	SRP040281	SAMN02902435	SRS655474	2015-08-27	2014-07-08	Human	Human	Age: 80-89; urine	2013	1			North America	United States							Javiana (Predicted)					CDC		Javiana	D1	l,z28	1,5	Javiana	9	l,z28	1,5	24	17	Javiana	Lineage 3		13	12	17	16	13
SAL_DA5846AA	2013K-0110	SAL_DA5846AA	SAL_FA3841AA_AS	PRJNA230403	SRP040281	SAMN02902434	SRS655473	2015-08-27	2014-07-08	Human	Human	Age: 70-79; stool	2013	1			North America	United States							Javiana (Predicted)					CDC		Javiana	D1	l,z28	1,5	Javiana	9	l,z28	1,5	24	17	Javiana	Lineage 3		13	12	17	16	13
SAL_DA5847AA	2013K-0109	SAL_DA5847AA	SAL_FA3843AA_AS	PRJNA230403	SRP040281	SAMN02902433	SRS655472	2015-08-27	2014-07-08	Human	Human	Age: 70-79; stool	2013	1			North America	United States							Javiana (Predicted)					CDC		Javiana	D1	l,z28	1,5	Javiana	9	l,z28	1,5	24	17	Javiana	Lineage 3		13	12	17	16	13
SAL_DA5903AA	FSE0196	SAL_DA5903AA	SAL_JA7576AA_AS	PRJNA186035	SRP018785	SAMN02698450	SRS652065	2015-08-27	2014-07-01	Environment	Soil/Dust	swab	2010	10			North America	United States	Florida						Newport	I				Food and Drug Administration - Center for Food Safety and Applied Nutrition (US)		Javiana	B	l,z28	1,5		-	l,z28	1,5	1674	17	Javiana	Lineage 3		13	12	17	520	13
SAL_DA6126AA	FLDOH-44	SAL_DA6126AA	SAL_FA3982AA_AS	PRJNA183848	SRP028812	SAMN02802290	SRS649086	2015-08-27	2014-06-27	Human	Human	Homo sapiens; Age: 0-4; stool	2014	4			North America	United States	Florida						Javiana					Food and Drug Administration - Center for Food Safety and Applied Nutrition (US)		Javiana	D1	l,z28	1,5	Javiana	9	l,z28	1,5	24	17	Javiana	Lineage 3		13	12	17	16	13
SAL_DA6127AA	FLDOH-34	SAL_DA6127AA	SAL_FA3983AA_AS	PRJNA183848	SRP028812	SAMN02802280	SRS649084	2015-08-27	2014-06-27	Human	Human	Homo sapiens; Age: 20-29	2014	2			North America	United States	Florida						Javiana					Food and Drug Administration - Center for Food Safety and Applied Nutrition (US)		Javiana	D1	l,z28	1,5	Javiana	9	l,z28	1,5	24	17	Javiana	Lineage 3		13	12	17	16	13
SAL_DA6128AA	FLDOH-36	SAL_DA6128AA	SAL_EA1741AA_AS	PRJNA183848	SRP028812	SAMN02802282	SRS649082	2015-08-27	2014-06-27	Human	Human	Homo sapiens; Age: 60-69; urine	2014	2			North America	United States	Florida						Javiana					Food and Drug Administration - Center for Food Safety and Applied Nutrition (US)		Javiana	D1	l,z28	1,5	Javiana	9	l,z28	1,5	24	17	Javiana	Lineage 3		13	12	17	16	13
SAL_DA6173AA	FLDOH-21	SAL_DA6173AA	SAL_FA4004AA_AS	PRJNA183848	SRP028812	SAMN02802267	SRS645273	2015-08-27	2014-06-23	Human	Human	Homo sapiens; Age: 0-4; stool	2014	1			North America	United States	Florida						Undetermined					FDA/CFSAN		Javiana	D1	l,z28	1,5	Javiana	9	l,z28	1,5	24	17	Javiana	Lineage 3		13	12	17	16	13
SAL_DA6197AA	FSE0111	SAL_DA6197AA	SAL_FA4018AA_AS	PRJNA186035	SRP018785	SAMN02698379	SRS645213	2015-08-27	2014-06-23	Environment	Plant	black pepper, whole	2013	4			Asia	Vietnam							9,12:5:-	I				Food and Drug Administration - Center for Food Safety and Applied Nutrition (US)		Panama	D1	l,z28	1,5	Javiana	9	l,z28	1,5	2494	17	Javiana	Lineage 3		60	429	17	662	13
SAL_DA6200AA	FLDOH-26	SAL_DA6200AA	SAL_FA4021AA_AS	PRJNA183848	SRP028812	SAMN02802272	SRS645210	2015-08-27	2014-06-23	Human	Human	Homo sapiens; Age: 60-69; stool	2014	2			North America	United States	Florida						Javiana					Food and Drug Administration - Center for Food Safety and Applied Nutrition (US)		Javiana	D1	l,z28	1,5	Javiana	9	l,z28	1,5	1674	17	Javiana	Lineage 3		13	12	17	520	13
SAL_DA6215AA	FSE0156	SAL_DA6215AA	SAL_BA4911AA_AS	PRJNA186035	SRP018785	SAMN02698424	SRS643724	2015-08-27	2014-06-20	Environment	Plant	white pepper	2011	5			Asia	Indonesia							Javiana	I				Food and Drug Administration - Center for Food Safety and Applied Nutrition (US)		Javiana	D1	l,z28	1,5	Javiana	9	l,z28	1,5	1547	17	Javiana	Lineage 3		60	12	17	16	13
SAL_DA6218AA	FSE0136	SAL_DA6218AA	SAL_FA4031AA_AS	PRJNA186035	SRP018785	SAMN02698404	SRS643721	2015-08-27	2014-06-20	Environment	Soil/Dust	environmental drag swab	2011	3			North America	United States	North Carolina						Javiana	I				Food and Drug Administration - Center for Food Safety and Applied Nutrition (US)		Javiana	D1	l,z28	1,5	Javiana	9	l,z28	1,5	24	17	Javiana	Lineage 3		13	12	17	16	13
SAL_DA6222AA	FSE0151	SAL_DA6222AA	SAL_FA4034AA_AS	PRJNA186035	SRP018785	SAMN02698419	SRS643717	2015-08-27	2014-06-20	Environment	Soil/Dust	swab	2011	5			North America	United States	Virginia						Javiana	I				Food and Drug Administration - Center for Food Safety and Applied Nutrition (US)		Javiana	D1	l,z28	1,5	Javiana	9	l,z28	1,5	24	17	Javiana	Lineage 3		13	12	17	16	13
SAL_DA6225AA	FSE0137	SAL_DA6225AA	SAL_FA4036AA_AS	PRJNA186035	SRP018785	SAMN02698405	SRS643714	2015-08-27	2014-06-20	Environment	Soil/Dust	environmental drag swab	2011	3			North America	United States	North Carolina						Javiana	I				Food and Drug Administration - Center for Food Safety and Applied Nutrition (US)		Javiana	D1	l,z28	1,5	Javiana	9	l,z28	1,5	24	17	Javiana	Lineage 3		13	12	17	16	13
SAL_DA6336AA	FLDOH-2	SAL_DA6336AA	SAL_BA3107AA_AS	PRJNA183848	SRP028812	SAMN02802248	SRS638987	2015-08-27	2014-06-16	Human	Human	Age: 70-79; Homo sapiens	2013	12			North America	United States	Florida						Javiana					Food and Drug Administration - Center for Food Safety and Applied Nutrition (US)		Javiana	D1	l,z28	1,5	Javiana	9	l,z28	1,5	24	17	Javiana	Lineage 3		13	12	17	16	13
SAL_DA6349AA	FLDOH-4	SAL_DA6349AA	SAL_FA4100AA_AS	PRJNA183848	SRP028812	SAMN02802250	SRS638966	2015-08-27	2014-06-16	Human	Human	Homo sapiens; Age: 70-79; stool	2014	1			North America	United States	Florida						Javiana					Food and Drug Administration - Center for Food Safety and Applied Nutrition (US)		Javiana	D1	l,z28	1,5	Javiana	9	l,z28	1,5	24	17	Javiana	Lineage 3		13	12	17	16	13
SAL_DA6352AA	FLDOH-1	SAL_DA6352AA	SAL_FA4103AA_AS	PRJNA183848	SRP028812	SAMN02802247	SRS638962	2015-08-27	2014-06-16	Human	Human	Homo sapiens; Age: 60-69; blood	2013	12			North America	United States	Florida						Javiana					Food and Drug Administration - Center for Food Safety and Applied Nutrition (US)		Javiana	D1	l,z28	1,5	Javiana	9	l,z28	1,5	24	17	Javiana	Lineage 3		13	12	17	16	13
SAL_DA6361AA	FLDOH-10	SAL_DA6361AA	SAL_FA4108AA_AS	PRJNA183848	SRP028812	SAMN02802256	SRS638614	2015-08-27	2014-06-16	Human	Human	Homo sapiens; Age: 0-4; stool	2014	1			North America	United States	Florida						Javiana					Food and Drug Administration - Center for Food Safety and Applied Nutrition (US)		Javiana	D1	l,z28	1,5	Javiana	9	l,z28	1,5	24	17	Javiana	Lineage 3		13	12	17	16	13
SAL_DA6379AA	FLDOH-11	SAL_DA6379AA	SAL_CA0706AA_AS	PRJNA183848	SRP028812	SAMN02802257	SRS638591	2015-08-27	2014-06-16	Human	Human	Homo sapiens; Age: 60-69; stool	2014	1			North America	United States	Florida						Javiana	I				FDA/CFSAN		Javiana	D1	l,z28	1,5	Javiana	9	l,z28	1,5	24	17	Javiana	Lineage 3		13	12	17	16	13
SAL_DA7113AA	VA-WGS-00242	SAL_DA7113AA	SAL_FA4422AA_AS	PRJNA219491	SRP033708	SAMN02767961	SRS620603	2015-08-27	2014-06-01	Livestock	Swine	homemade pork BBQ	2008	9			North America	United States	North Carolina						Javiana	I				Food and Drug Administration - Center for Food Safety and Applied Nutrition (US)		Javiana	D1	l,z28	1,5	Javiana	9	l,z28	1,5	24	17	Javiana	Lineage 3		13	12	17	16	13
SAL_DA7152AA	FNW18t67	SAL_DA7152AA	SAL_BA5400AA_AS	PRJNA186035	SRP018785	SAMN02678730	SRS614131	2015-08-27	2014-05-19	Food	Dairy	ranchero cheese	2007	11			North America	Mexico							Tyresoe	I				Food and Drug Administration - Center for Food Safety and Applied Nutrition (US)		Javiana	D1	l,z28	1,5	Javiana	9	l,z28	1,5	24	17	Javiana	Lineage 3		13	12	17	16	13
SAL_DA7163AA	FNW18t99	SAL_DA7163AA	SAL_EA1725AA_AS	PRJNA186035	SRP018785	SAMN02678739	SRS614118	2015-08-27	2014-05-19	Wild Animal	Invertebrate	fresh frozen snails	2008	4			North America	Mexico							Javiana	I				Food and Drug Administration - Center for Food Safety and Applied Nutrition (US)		Javiana	D1	l,z28	1,5	Javiana	9	l,z28	1,5	24	17	Javiana	Lineage 3		13	12	17	16	13
SAL_DA7171AA	FNW18t70	SAL_DA7171AA	SAL_FA4450AA_AS	PRJNA186035	SRP018785	SAMN02678732	SRS614090	2015-08-27	2014-05-19	Food	Dairy	asadero cheese	2007	11			North America	Mexico							Tyresoe	I				Food and Drug Administration - Center for Food Safety and Applied Nutrition (US)		Javiana	D1	l,z28	1,5	Javiana	9	l,z28	1,5	24	17	Javiana	Lineage 3		13	12	17	16	13
SAL_DA7217AA	FLUFL-1353	SAL_DA7217AA	SAL_FA4470AA_AS	PRJNA183848	SRP028812	SAMN02737298	SRS607657	2015-08-27	2014-05-15	Environment	Water/River	pond water	2012	12			North America	United States	Georgia						Javiana (Predicted)					FDA/CFSAN		Javiana	D1	l,z28	1,5	Javiana	9	l,z28	1,5	24	17	Javiana	Lineage 3		13	12	17	16	13
SAL_DA7235AA	FLUFL-1352	SAL_DA7235AA	SAL_FA4483AA_AS	PRJNA183848	SRP028812	SAMN02737297	SRS607631	2015-08-27	2014-05-15	Environment	Soil/Dust	sediment	2012	12			North America	United States	Georgia						Javiana (Predicted)					FDA/CFSAN		Javiana	D1	l,z28	1,5	Javiana	9	l,z28	1,5	24	17	Javiana	Lineage 3		13	12	17	16	13
SAL_DA8231AA	03_6485-sc-2010-09-29-985948	SAL_DA8231AA	SAL_FA5065AA_AS	PRJEB2290	ERP000349	SAMEA888321	ERS016112	2015-08-27	2011-03-18																Javiana (Predicted)					SC		Javiana	D1	l,z28	1,5	Javiana	9	l,z28	1,5	24	17	Javiana	Lineage 3		13	12	17	16	13
SAL_DA8237AA	9800123-sc-2010-09-29-985816	SAL_DA8237AA	SAL_FA5070AA_AS	PRJEB2289	ERP000348	SAMEA905540	ERS015980	2015-08-27	2011-03-18																Javiana (Predicted)					SC		Javiana	D1	l,z28	1,5	Javiana	9	l,z28	1,5	175	17	Javiana	Lineage 3		13	12	63	16	13
SAL_DA8538AA	FSE0014	SAL_DA8538AA	SAL_FA5265AA_AS	PRJNA186035	SRP018785	SAMN02345434	SRS585710	2015-08-27	2014-04-01	ND	ND/Others	raw whole cucumber	2012	1			North America	United States	Ohio						Javiana (Predicted)					FDA/CFSAN		Javiana	D1	l,z28	1,5	Javiana	9	l,z28	1,5	2394	17	Javiana	Lineage 3		13	12	17	16	13
SAL_DA8546AA	FSE0045	SAL_DA8546AA	SAL_FA5271AA_AS	PRJNA186035	SRP018785	SAMN02345389	SRS585702	2015-08-27	2014-04-01	Environment	Soil/Dust	environmental sample	2011	11			North America	Mexico							Javiana (Predicted)					FDA/CFSAN		Javiana	D1	l,z28	1,5	Javiana	9	l,z28	1,5	2394	17	Javiana	Lineage 3		13	12	17	16	13
SAL_DA8558AA	FSE0092	SAL_DA8558AA	SAL_FA5279AA_AS	PRJNA186035	SRP018785	SAMN02344943	SRS585686	2015-08-27	2014-04-01	Environment	Water/River	canal water	2010	9			North America	Mexico							Javiana	I				Food and Drug Administration - Center for Food Safety and Applied Nutrition (US)		Javiana	D1	l,z28	1,5	Javiana	9	l,z28	1,5	2394	17	Javiana	Lineage 3		13	12	17	16	13
SAL_DA8589AA	FSE0097	SAL_DA8589AA	SAL_FA5302AA_AS	PRJNA186035	SRP018785	SAMN02344944	SRS585629	2015-08-27	2014-04-01	Environment	Water/River	canal water	2010	9			North America	Mexico							Javiana	I				Food and Drug Administration - Center for Food Safety and Applied Nutrition (US)		Javiana	D1	l,z28	1,5	Javiana	9	l,z28	1,5	2394	17	Javiana	Lineage 3		13	12	17	16	13
SAL_DA8659AA	FNW19I08	SAL_DA8659AA	SAL_FA5337AA_AS	PRJNA186035	SRP018785	SAMN02345348	SRS580850	2015-08-27	2014-03-24	Environment	Plant	mango	2011	10			North America	Mexico							Javiana	I				Food and Drug Administration - Center for Food Safety and Applied Nutrition (US)		Javiana	D1	l,z28	1,5	Javiana	9	l,z28	1,5	24	17	Javiana	Lineage 3		13	12	17	16	13
SAL_DA8826AA	UFL-1019	SAL_DA8826AA	SAL_BA2899AA_AS	PRJNA183848	SRP028812	SAMN02646184	SRS577577	2015-08-27	2014-03-18	Environment	Water/River	water pond MD1	2012	2			North America	United States	Georgia						Javiana (Predicted)	I				FDA/CFSAN		Javiana	D1	l,z28	1,5	Javiana	9	l,z28	1,5	24	17	Javiana	Lineage 3		13	12	17	16	13
SAL_DA8864AA	UFL-604	SAL_DA8864AA	SAL_FA5436AA_AS	PRJNA183848	SRP028812	SAMN02646164	SRS575667	2015-08-27	2014-03-15	Environment	Water/River	water pond VH1	2011	8			North America	United States	Georgia						Javiana (Predicted)	I				FDA/CFSAN		Javiana	D1	l,z28	1,5	Javiana	9	l,z28	1,5	24	17	Javiana	Lineage 3		13	12	17	16	13
SAL_DA9132AA	UFL-420	SAL_DA9132AA	SAL_BA3038AA_AS	PRJNA183848	SRP028812	SAMN02646153	SRS567680	2015-08-27	2014-03-08	Environment	Water/River	sediment pond MD1	2011	6			North America	United States	Georgia						Javiana (Predicted)	I				Food Safety and Inspection Service (US)		Javiana	D1	l,z28	1,5	Javiana	9	l,z28	1,5	24	17	Javiana	Lineage 3		13	12	17	16	13
SAL_DA9356AA	FNW19H59	SAL_DA9356AA	SAL_FA5524AA_AS	PRJNA186035	SRP018785	SAMN02345056	SRS565866	2015-08-27	2014-03-04	Environment	Plant	cantaloupes	2010	12			North America	Mexico							Javiana	I				Food Safety and Inspection Service (US)		Javiana	D1	l,z28	1,5	Javiana	9	l,z28	1,5	24	17	Javiana	Lineage 3		13	12	17	16	13
SAL_DB0027AA	PNUSAS142247	SAL_DB0027AA	SAL_HC1361AA_AS	PRJNA271470	SRP061987	SAMN14647030	SRS6506979	2020-04-28	2020-04-20	Human	Human	Homo sapiens; stool	2015	8				United States	Maryland											PulseNet Next Generation Subtyping Methods Unit		Javiana	D1	l,z28	1,5	Javiana	9	l,z28	1,5	24	17	Javiana	Lineage 3		13	12	17	16	13
SAL_DB0029AA	PNUSAS142249	SAL_DB0029AA	SAL_HC1359AA_AS	PRJNA271470	SRP061987	SAMN14647079	SRS6506977	2020-04-28	2020-04-20	Human	Human	Homo sapiens; stool	2015	9				United States	Maryland											PulseNet Next Generation Subtyping Methods Unit		Javiana	D1	l,z28	1,5	Javiana	9	l,z28	1,5	24	17	Javiana	Lineage 3		13	12	17	16	13
SAL_DB0032AA	PNUSAS142269	SAL_DB0032AA	SAL_HC1356AA_AS	PRJNA271470	SRP061987	SAMN14647037	SRS6506974	2020-04-28	2020-04-20	Human	Human	Homo sapiens; stool	2015	8				United States	Maryland											PulseNet Next Generation Subtyping Methods Unit		Javiana	B	l,z28	1,5		-	l,z28	1,5	24	17	Javiana	Lineage 3		13	12	17	16	13
SAL_DB0041AA	PNUSAS142262	SAL_DB0041AA	SAL_HC1845AA_AS	PRJNA271470	SRP061987	SAMN14647026	SRS6506965	2020-04-28	2020-04-20	Human	Human	Homo sapiens; stool	2015	8				United States	Maryland											PulseNet Next Generation Subtyping Methods Unit		Javiana	D1	l,z28	1,5	Javiana	9	l,z28	1,5	3599	17	Javiana	Lineage 3		689	12	17	16	13
SAL_DB0042AA	2015AM-2345	SAL_DB0042AA	SAL_HC1346AA_AS	PRJNA271470	SRP061987	SAMN14647029	SRS6506964	2020-04-28	2020-04-20	Human	Human	Homo sapiens; other	2015	8				United States	Maryland											PulseNet Next Generation Subtyping Methods Unit		Javiana	D1	l,z28	1,5	Javiana	9	l,z28	1,5	24	17	Javiana	Lineage 3		13	12	17	16	13
SAL_DB0045AA	PNUSAS142263	SAL_DB0045AA	SAL_HC1844AA_AS	PRJNA271470	SRP061987	SAMN14647025	SRS6506961	2020-04-28	2020-04-20	Human	Human	Homo sapiens; URINE CLEAN CATCH	2015	8				United States	Maryland											PulseNet Next Generation Subtyping Methods Unit		Javiana	D1	l,z28	1,5	Javiana	9	l,z28	1,5	24	17	Javiana	Lineage 3		13	12	17	16	13
SAL_DB0046AA	PNUSAS142258	SAL_DB0046AA	SAL_HC1342AA_AS	PRJNA271470	SRP061987	SAMN14647001	SRS6506960	2020-04-28	2020-04-20	Human	Human	Homo sapiens; stool	2015	8				United States	Maryland											PulseNet Next Generation Subtyping Methods Unit		Javiana	D1	l,z28	1,5	Javiana	9	l,z28	1,5	24	17	Javiana	Lineage 3		13	12	17	16	13
SAL_DB0048AA	PNUSAS142259	SAL_DB0048AA	SAL_HC1340AA_AS	PRJNA271470	SRP061987	SAMN14647000	SRS6506958	2020-04-28	2020-04-20	Human	Human	Homo sapiens; stool	2015	8				United States	Maryland											PulseNet Next Generation Subtyping Methods Unit		Javiana	D1	l,z28	1,5	Javiana	9	l,z28	1,5	24	17	Javiana	Lineage 3		13	12	17	16	13
SAL_DB0321AA	PNUSAS141970	SAL_DB0321AA	SAL_HC2019AA_AS	PRJNA271470	SRP061987	SAMN14608989	SRS6491682	2020-04-28	2020-04-16	Human	Human	Homo sapiens; stool	2015	8				United States	Maryland											PulseNet Next Generation Subtyping Methods Unit		Javiana	D1	l,z28	1,5	Javiana	9	l,z28	1,5	24	17	Javiana	Lineage 3		13	12	17	16	13
SAL_DB0326AA	PNUSAS141969	SAL_DB0326AA	SAL_HC2014AA_AS	PRJNA271470	SRP061987	SAMN14608920	SRS6491677	2020-04-28	2020-04-16	Human	Human	Homo sapiens; stool	2015	7				United States	Maryland											PulseNet Next Generation Subtyping Methods Unit		Javiana	D1	l,z28	1,5	Javiana	9	l,z28	1,5	24	17	Javiana	Lineage 3		13	12	17	16	13
SAL_DB0329AA	PNUSAS141979	SAL_DB0329AA	SAL_HC2011AA_AS	PRJNA271470	SRP061987	SAMN14608996	SRS6491674	2020-04-28	2020-04-16	Human	Human	Homo sapiens; stool	2015	7				United States	Maryland											PulseNet Next Generation Subtyping Methods Unit		Javiana	D1	l,z28	1,5	Javiana	9	l,z28	1,5	24	17	Javiana	Lineage 3		13	12	17	16	13
SAL_DB0346AA	PNUSAS141933	SAL_DB0346AA	SAL_HC1994AA_AS	PRJNA271470	SRP061987	SAMN14606419	SRS6489021	2020-04-28	2020-04-16	Human	Human	Homo sapiens; stool	2015	9				United States	Maryland											PulseNet Next Generation Subtyping Methods Unit		Javiana	D1	l,z28	1,5		9,46	l,z28	1,5	24	17	Javiana	Lineage 3		13	12	17	16	13
SAL_DB0348AA	PNUSAS141927	SAL_DB0348AA	SAL_HC1992AA_AS	PRJNA271470	SRP061987	SAMN14606493	SRS6489018	2020-04-28	2020-04-16	Human	Human	Homo sapiens; stool	2015	10				United States	Maryland											PulseNet Next Generation Subtyping Methods Unit		Javiana	B	l,z28	1,5		-	l,z28	1,5	1674	17	Javiana	Lineage 3		13	12	17	520	13
SAL_DB0354AA	PNUSAS141932	SAL_DB0354AA	SAL_HC1986AA_AS	PRJNA271470	SRP061987	SAMN14606427	SRS6489003	2020-04-28	2020-04-16	Human	Human	Homo sapiens; stool	2015	9				United States	Maryland											PulseNet Next Generation Subtyping Methods Unit		Javiana	D1	l,z28	1,5	Javiana	9	l,z28	1,5	24	17	Javiana	Lineage 3		13	12	17	16	13
SAL_DB0355AA	PNUSAS141931	SAL_DB0355AA	SAL_HC1985AA_AS	PRJNA271470	SRP061987	SAMN14606309	SRS6488999	2020-04-28	2020-04-16	Human	Human	Homo sapiens; stool	2015	9				United States	Maryland											PulseNet Next Generation Subtyping Methods Unit		Javiana	D1	l,z28	1,5		9,46	l,z28	1,5	24	17	Javiana	Lineage 3		13	12	17	16	13
SAL_DB0359AA	PNUSAS141938	SAL_DB0359AA	SAL_HC1981AA_AS	PRJNA271470	SRP061987	SAMN14606315	SRS6488995	2020-04-28	2020-04-16	Human	Human	Homo sapiens; stool	2015	9				United States	Maryland											PulseNet Next Generation Subtyping Methods Unit		Javiana	B	l,z28	1,5		-	l,z28	1,5	1674	17	Javiana	Lineage 3		13	12	17	520	13
SAL_DB0455AA	PNUSAS137267	SAL_DB0455AA	SAL_HC4433AA_AS	PRJNA271470	SRP061987	SAMN14337586	SRS6287739	2020-05-01	2020-03-09	Human	Human	Homo sapiens; stool	2016	7				United States	Maryland											PulseNet Next Generation Subtyping Methods Unit		Javiana	D1	l,z28	1,5	Javiana	9	l,z28	1,5	24	17	Javiana	Lineage 3		13	12	17	16	13
SAL_DB0468AA	PNUSAS137277	SAL_DB0468AA	SAL_HC4410AA_AS	PRJNA271470	SRP061987	SAMN14337572	SRS6287725	2020-05-01	2020-03-09	Human	Human	Homo sapiens; stool	2016	6				United States	Maryland											PulseNet Next Generation Subtyping Methods Unit		Javiana	D1	l,z28	1,5	Javiana	9	l,z28	1,5	24	17	Javiana	Lineage 3		13	12	17	16	13
SAL_DB0473AA	PNUSAS137269	SAL_DB0473AA	SAL_HC4405AA_AS	PRJNA271470	SRP061987	SAMN14337553	SRS6287720	2020-05-01	2020-03-09	Human	Human	Homo sapiens; stool	2016	2				United States	Maryland											PulseNet Next Generation Subtyping Methods Unit		Javiana	D1	l,z28	1,5		-	l,z28	1,5	24	17	Javiana	Lineage 3		13	12	17	16	13
SAL_DB1292AA	FARPER-220	SAL_DB1292AA	SAL_HC4898AA_AS	PRJNA224116		SAMN11252889	SRS4628816	2020-05-08	2019-07-08	Poultry	Poultry	liver and spleen of chicken (broiler)	2017				South America	Peru					-14.06	-75.73	Javiana	I				FARVET S.A.C.		Javiana	D1	l,z28	1,5	Javiana	9	l,z28	1,5	7944	17	Javiana	Lineage 3		13	12	17	520	13
SAL_DB1989AA	SAL-19-VL-NY-FL-0019	SAL_DB1989AA	SAL_HC5794AA_AS	PRJNA324570	SRP090352	SAMN14911214	SRS6654691	2020-05-17	2020-05-13	Poultry	Poultry	Lung (Gallus gallus domesticus)	2019	8				United States	Florida						Javiana	I				FDA Center for Food Safety and Applied Nutrition		Javiana	D1	l,z28	1,5	Javiana	9	l,z28	1,5	24	17	Javiana	Lineage 3		13	12	17	16	13
SAL_DB2032AA	20CT02GT04-S1	SAL_DB2032AA	SAL_HC5751AA_AS	PRJNA292661	SRP063697	SAMN14891683	SRS6645801	2020-05-17	2020-05-11	Poultry	Poultry	turkey	2020	2				United States	Connecticut											PulseNet Next Generation Subtyping Methods Unit		Javiana	B	l,z28	1,5		-	l,z28	1,5	1674	17	Javiana	Lineage 3		13	12	17	520	13
SAL_DB2320AA	2015AM-1343	SAL_DB2320AA	SAL_HC6681AA_AS	PRJNA271470	SRP061987	SAMN14983938	SRS6685442	2020-05-21	2020-05-20	Human	Human	Homo sapiens; stool	2015	6				United States	Maryland											PulseNet Next Generation Subtyping Methods Unit		Javiana	D1	-	1,5		9	-	1,5	24	17	Javiana	Lineage 3		13	12	17	16	13
SAL_DB2349AA	PNUSAS081788	SAL_DB2349AA	SAL_HC6865AA_AS	PRJNA271470	SRP061987	SAMN14987846	SRS6689351	2020-05-22	2020-05-21	Human	Human	Homo sapiens; stool						United States	Maryland											PulseNet Next Generation Subtyping Methods Unit		Javiana	D1	l,z28	1,5	Javiana	9	l,z28	1,5	24	17	Javiana	Lineage 3		13	12	17	16	13
SAL_DB2359AA	1090403624	SAL_DB2359AA	SAL_HC6855AA_AS	PRJNA634019	SRP262570	SAMN14979512	SRS6689017	2020-05-22	2020-05-21	Food	Plant	Soy; Soya spruce	1905	6			Europe	Netherlands							Javiana	I				Institut de Biologie Integrative et des Systemes		Javiana	D1	l,z28	1,5	Javiana	9	l,z28	1,5	24	17	Javiana	Lineage 3		13	12	17	16	13
SAL_DB2480AA	PNUSAS081796	SAL_DB2480AA	SAL_HC6912AA_AS	PRJNA271470	SRP061987	SAMN14992876	SRS6691862	2020-05-22	2020-05-21	Human	Human	Homo sapiens; stool	2015	6				United States	Maryland											PulseNet Next Generation Subtyping Methods Unit		Javiana	D1	l,z28	1,5	Javiana	9	l,z28	1,5	24	17	Javiana	Lineage 3		13	12	17	16	13
SAL_DB2488AA	PNUSAS081784	SAL_DB2488AA	SAL_HC6904AA_AS	PRJNA271470	SRP061987	SAMN14992862	SRS6691851	2020-05-22	2020-05-21	Human	Human	Homo sapiens; stool	2015	6				United States	Maryland											PulseNet Next Generation Subtyping Methods Unit		Javiana	D1	l,z28	1,5	Javiana	9	l,z28	1,5	24	17	Javiana	Lineage 3		13	12	17	16	13
SAL_DB2489AA	PNUSAS081786	SAL_DB2489AA	SAL_HC6903AA_AS	PRJNA271470	SRP061987	SAMN14992872	SRS6691850	2020-05-22	2020-05-21	Human	Human	Homo sapiens; stool	2015	5				United States	Maryland											PulseNet Next Generation Subtyping Methods Unit		Javiana	D1	l,z28	1,5	Javiana	9	l,z28	1,5	24	17	Javiana	Lineage 3		13	12	17	16	13
SAL_DB2498AA	PNUSAS081789	SAL_DB2498AA	SAL_HC6894AA_AS	PRJNA271470	SRP061987	SAMN14992871	SRS6691839	2020-05-22	2020-05-21	Human	Human	Homo sapiens; stool						United States	Maryland											PulseNet Next Generation Subtyping Methods Unit		Javiana	D1	l,z28	1,5	Javiana	9	l,z28	1,5	24	17	Javiana	Lineage 3		13	12	17	16	13
SAL_DB2507AA	PNUSAS080449	SAL_DB2507AA	SAL_HC6885AA_AS	PRJNA271470	SRP061987	SAMN14992856	SRS6691820	2020-05-22	2020-05-21	Human	Human	Homo sapiens; stool	2015	5				United States	Maryland											PulseNet Next Generation Subtyping Methods Unit		Javiana	D1	l,z28	1,5	Javiana	9	l,z28	1,5	24	17	Javiana	Lineage 3		13	12	17	16	13
SAL_DB3859AA	FSIS12031107	SAL_DB3859AA	SAL_HC9148AA_AS	PRJNA242847	SRP040648	SAMN15187448	SRS6816489	2020-06-11	2020-06-10	Livestock	Swine	Product-Raw-Ground, Comminuted or Otherwise Nonintact-Pork	2020					United States	Missouri						Javiana	I				United States Department of Agriculture, Food Safety and Inspection Service		Javiana	D1	l,z28	1,5	Javiana	9	l,z28	1,5	2783	17	Javiana	Lineage 3		13	12	17	16	117
SAL_DB4055AA	SAL-19-VL-OH-GA-0019	SAL_DB4055AA	SAL_IC0255AA_AS	PRJNA316452	SRP115297	SAMN15239380	SRS6844334	2020-06-16	2020-06-15	Wild Animal	Primate	Feces (Lemur catta)	2019	7			North America	United States	Georgia						Javiana	I				FDA Center for Food Safety and Applied Nutrition		Javiana	D1	l,z28	1,5	Javiana	9	l,z28	1,5	24	17	Javiana	Lineage 3		13	12	17	16	13
SAL_DB4244AA	Z009	SAL_DB4244AA	SAL_IC0001AA_AS	PRJNA639393	SRP267264	SAMN15234847	SRS6838752	2020-06-19	2020-06-19	Human	Human	Homo sapiens; human	2012				Asia	China					35.8617	104.195						University of New South Wales		Panama	D1	l,z28	1,5	Javiana	9	l,z28	1,5	2494	17	Javiana	Lineage 3		60	429	17	662	13
SAL_DB5334AA	FDA1143547	SAL_DB5334AA	SAL_IC2578AA_AS	PRJNA186035	SRP018785	SAMN15401554	SRS6921902	2020-07-02	2020-06-29	Environment	Plant	Frozen Peppers	2020	5				Guyana												FDA Center for Food Safety and Applied Nutrition		Javiana	D1	l,z28	1,5	Javiana	9	l,z28	1,5	4987	17	Javiana	Lineage 3		13	12	728	16	117
SAL_DB5335AA	FDA1143547	SAL_DB5335AA	SAL_IC2577AA_AS	PRJNA186035	SRP018785	SAMN15401551	SRS6921889	2020-07-02	2020-06-29	Environment	Plant	Frozen Peppers	2020	5				Guyana												FDA Center for Food Safety and Applied Nutrition		Javiana	D1	l,z28	1,5	Javiana	9	l,z28	1,5	4987	17	Javiana	Lineage 3		13	12	728	16	117
SAL_EA0031AA	FNE0029	SAL_EA0031AA	SAL_FA5860AA_AS	PRJNA186035	SRP018785	SAMN02345236	SRS529948	2015-08-27	2014-01-14	Aquatic Animal	Fish	frozen yellowfin sole fillets	2011	6			Asia	China							Iiia 9,12:-:1,5	IIIa				Food and Drug Administration - Center for Food Safety and Applied Nutrition (US)		Javiana	D1	l,z28	1,5	Javiana	9	l,z28	1,5	1547	17	Javiana	Lineage 3		60	12	17	16	13
SAL_EA0071AA	NY_IDR1200015012U1-1	SAL_EA0071AA	SAL_FA5878AA_AS	PRJNA183850	SRP028607	SAMN01902405	SRS529633	2015-08-27	2014-01-13	Environment	Plant	mixed fruit	2012	5			North America	United States	New York	Schenectady					Javiana	I				Food and Drug Administration - Center for Food Safety and Applied Nutrition (US)		Javiana	D1	l,z28	1,5	Javiana	9	l,z28	1,5	1674	17	Javiana	Lineage 3		13	12	17	520	13
SAL_EA0206AA	FSF0003	SAL_EA0206AA	SAL_FA5928AA_AS	PRJNA186035	SRP018785	SAMN02345428	SRS528087	2015-08-27	2014-01-10	Wild Animal	Reptile	gecko	2012	1			Asia	China							Javiana (Predicted)					FDA/CFSAN		Javiana	D1	l,z28	1,5	Javiana	9	l,z28	1,5	437	17	Javiana	Lineage 3		13	12	63	16	13
SAL_EA0241AA	FDN0045	SAL_EA0241AA	SAL_FA5951AA_AS	PRJNA186035	SRP018785	SAMN02345573	SRS525234	2015-08-27	2014-01-06	Environment	Plant	papaya	2012	5			North America	Mexico							Javiana	I				FDA/CFSAN		Javiana	D1	l,z28	1,5	Javiana	9	l,z28	1,5	1674	17	Javiana	Lineage 3		13	12	17	520	13
SAL_EA0255AA	FDN0007	SAL_EA0255AA	SAL_CA1598AA_AS	PRJNA186035	SRP018785	SAMN02345533	SRS525161	2015-08-27	2014-01-06	Environment	Plant	persian cucumbers	2012	4			North America	Mexico							Javiana (Predicted)					Food and Drug Administration - Center for Food Safety and Applied Nutrition (US)		Javiana	D1	l,z28	1,5	Javiana	9	l,z28	1,5	-17	17	Javiana	Lineage 3		13	12	17	16	13
SAL_EA0259AA	FDN0043	SAL_EA0259AA	SAL_FA5960AA_AS	PRJNA186035	SRP018785	SAMN02345572	SRS525157	2015-08-27	2014-01-06	Environment	Plant	papaya	2012	5			North America	Mexico							Javiana	I				FDA/CFSAN		Javiana	D1	l,z28	1,5	Javiana	9	l,z28	1,5	1674	17	Javiana	Lineage 3		13	12	17	520	13
SAL_EA0314AA	FCC0084	SAL_EA0314AA	SAL_FA5990AA_AS	PRJNA186035	SRP018785	SAMN02345516	SRS524013	2015-08-27	2014-01-03	Environment	Plant	cantaloupe	2012	4			North America	Mexico							Javiana (Predicted)					FDA/CFSAN		Javiana	D1	l,z28	1,5	Javiana	9	l,z28	1,5	24	17	Javiana	Lineage 3		13	12	17	16	13
SAL_EA0394AA	FSF0045	SAL_EA0394AA	SAL_FA6023AA_AS	PRJNA186035	SRP018785	SAMN02344849	SRS517604	2015-08-27	2013-12-19	Food	Plant	organic chile powder	2010	6			North America	United States	Nevada						9,12:L,Z28:-					Food and Drug Administration - Center for Food Safety and Applied Nutrition (US)		Javiana	D1	l,z28	l,z13,z28		9	l,z28	-	24	17	Javiana	Lineage 3		13	12	17	16	13
SAL_EA0400AA	FCC0059	SAL_EA0400AA	SAL_FA6030AA_AS	PRJNA186035	SRP018785	SAMN02344843	SRS517598	2015-08-27	2013-12-19	Environment	Plant	cantaloupe	2010	5			North America	Guatemala							Javiana	I				Food and Drug Administration - Center for Food Safety and Applied Nutrition (US)		Javiana	D1	l,z28	1,5	Javiana	9	l,z28	1,5	1674	17	Javiana	Lineage 3		13	12	17	520	13
SAL_EA0436AA	AZ_TG68551	SAL_EA0436AA	SAL_FA6049AA_AS	PRJNA183847	SRP028894	SAMN02314193	SRS515125	2015-08-27	2013-12-16	Environment	Soil/Dust	Factory swab	2011	2			North America	United States	Texas						Javiana	I				Food and Drug Administration - Center for Food Safety and Applied Nutrition (US)		Javiana	D1	l,z28	1,5	Javiana	9	l,z28	1,5	1674	17	Javiana	Lineage 3		13	12	17	520	13
SAL_EA0569AA	FSW0057	SAL_EA0569AA	SAL_FA6116AA_AS	PRJNA186035	SRP018785	SAMN02345111	SRS509929	2015-08-27	2013-12-02	Environment	Soil/Dust	swab	2011	2			North America	United States	California						Javiana	I				Food and Drug Administration - Center for Food Safety and Applied Nutrition (US)		Javiana	D1	l,z28	1,5	Javiana	9	l,z28	1,5	24	17	Javiana	Lineage 3		13	12	17	16	13
SAL_EA0628AA	FSW0045	SAL_EA0628AA	SAL_BA9540AA_AS	PRJNA186035	SRP018785	SAMN02345148	SRS505849	2015-08-27	2013-11-21	Aquatic Animal	Shellfish	octopus, raw	2011	3			Asia	Philippines							Javiana	I				Food and Drug Administration - Center for Food Safety and Applied Nutrition (US)		Javiana	D1	l,z28	1,5	Javiana	9	l,z28	1,5	589	17	Javiana	Lineage 3		187	12	17	16	13
SAL_EA0666AA	CFSAN006272	SAL_EA0666AA	SAL_BA4977AA_AS	PRJNA217342	SRP029479	SAMN02335410	SRS504691	2015-08-27	2013-11-19	Environment	ND/Others	environmental	2013	2			North America	Mexico	Sinaloa						Javiana (Predicted)	I				FDA/CFSAN		Javiana	D1	l,z28	1,5	Javiana	9	l,z28	1,5	24	17	Javiana	Lineage 3		13	12	17	16	13
SAL_EA0668AA	FSW0022	SAL_EA0668AA	SAL_FA6175AA_AS	PRJNA186035	SRP018785	SAMN02345331	SRS504689	2015-08-27	2013-11-19	Environment	Plant	habanero peppers	2011	9			North America	Mexico							Javiana (Predicted)					FDA/CFSAN		Javiana	D1	l,z28	1,5	Javiana	9	l,z28	1,5	2909	17	Javiana	Lineage 3		13	12	482	16	13
SAL_EA0679AA	FCC0008	SAL_EA0679AA	SAL_FA6182AA_AS	PRJNA186035	SRP018785	SAMN02345031	SRS504676	2015-08-27	2013-11-19	Environment	Soil/Dust	swab	2010	12			North America	United States	New Mexico						Javiana	I				Food and Drug Administration - Center for Food Safety and Applied Nutrition (US)		Javiana	D1	l,z28	1,5	Javiana	9	l,z28	1,5	24	17	Javiana	Lineage 3		13	12	17	16	13
SAL_EA0682AA	CFSAN006271	SAL_EA0682AA	SAL_FA6184AA_AS	PRJNA217342	SRP029479	SAMN02335409	SRS504673	2015-08-27	2013-11-19	Environment	Plant	surface	2012	6			North America	Mexico	Sinaloa						Javiana	I				Food and Drug Administration - Center for Food Safety and Applied Nutrition (US)		Javiana	D1	l,z28	1,5	Javiana	9	l,z28	1,5	2394	17	Javiana	Lineage 3		13	12	17	16	13
SAL_EA0692AA	CFSAN006268	SAL_EA0692AA	SAL_FA6188AA_AS	PRJNA217342	SRP029479	SAMN02335406	SRS504663	2015-08-27	2013-11-19	Environment	Water/River	water	2011	11			North America	Mexico	Sinaloa						Javiana	I				Food and Drug Administration - Center for Food Safety and Applied Nutrition (US)		Javiana	B	l,z28	1,5		-	l,z28	1,5	24	17	Javiana	Lineage 3		13	12	17	16	13
SAL_EA0732AA	FSW0014	SAL_EA0732AA	SAL_BA5175AA_AS	PRJNA186035	SRP018785	SAMN02345344	SRS504622	2015-08-27	2013-11-19	Environment	Plant	jalapeno pepper	2011	10			North America	Mexico							Javiana (Predicted)					FDA/CFSAN		Javiana	D1	l,z28	1,5	Javiana	9	l,z28	1,5	24	17	Javiana	Lineage 3		13	12	17	16	13
SAL_EA0756AA	CFSAN006270	SAL_EA0756AA	SAL_FA6221AA_AS	PRJNA217342	SRP029479	SAMN02335408	SRS504595	2015-08-27	2013-11-19	Environment	Water/River	water	2012	3			North America	Mexico	Sinaloa						Javiana	I				Food and Drug Administration - Center for Food Safety and Applied Nutrition (US)		Javiana	D1	l,z28	1,5	Javiana	9	l,z28	1,5	24	17	Javiana	Lineage 3		13	12	17	16	13
SAL_EA1502AA	PNUSAS000698	SAL_EA1502AA	SAL_FA7352AA_AS	PRJNA230403	SRP040281	SAMN04001737	SRS1048150	2015-09-03	2015-08-28	Human	Human	Age: 30-39; stool	2015	6			North America	United States							Javiana					Centers for Disease Control and Prevention - PulseNet		Javiana	D1	l,z28	1,5	Javiana	9	l,z28	1,5	24	17	Javiana	Lineage 3		13	12	17	16	13
SAL_EA1710AA	PNUSAS000760	SAL_EA1710AA	SAL_FA7585AA_AS	PRJNA230403	SRP040281	SAMN04032744	SRS1061928	2015-09-09	2015-09-09	Human	Human	Age: 0-4; stool	2015	8			North America	United States							Javiana (Predicted)					PulseNet Next Generation Subtyping Methods Unit		Javiana	D1	l,z28	1,5	Javiana	9	l,z28	1,5	24	17	Javiana	Lineage 3		13	12	17	16	13
SAL_EA1720AA	2015K-0920	SAL_EA1720AA	SAL_FA7652AA_AS	PRJNA230403	SRP040281	SAMN04054208	SRS1065169	2015-09-09	2015-09-11								North America	United States							Javiana (Predicted)					Centers for Disease Control and Prevention - PulseNet		Javiana	D1	l,z28	1,5	Javiana	9	l,z28	1,5	24	17	Javiana	Lineage 3		13	12	17	16	13
SAL_EA1721AA	2015K-0921	SAL_EA1721AA	SAL_FA7680AA_AS	PRJNA230403	SRP040281	SAMN04054207	SRS1065170	2015-09-09	2015-09-11								North America	United States							Javiana (Predicted)					Centers for Disease Control and Prevention - PulseNet		Javiana	D1	l,z28	1,5	Javiana	9	l,z28	1,5	24	17	Javiana	Lineage 3		13	12	17	16	13
SAL_EA1722AA	2015K-0919	SAL_EA1722AA	SAL_FA7668AA_AS	PRJNA230403	SRP040281	SAMN04054206	SRS1065168	2015-09-09	2015-09-11								North America	United States							Javiana (Predicted)					Centers for Disease Control and Prevention - PulseNet		Javiana	D1	l,z28	1,5	Javiana	9	l,z28	1,5	24	17	Javiana	Lineage 3		13	12	17	16	13
SAL_EA1723AA	2015K-0918	SAL_EA1723AA	SAL_FA7670AA_AS	PRJNA230403	SRP040281	SAMN04054205	SRS1065166	2015-09-09	2015-09-11								North America	United States							Javiana (Predicted)					EDLB-CDC		Javiana	D1	l,z28	1,5	Javiana	9	l,z28	1,5	24	17	Javiana	Lineage 3		13	12	17	16	13
SAL_EA1724AA	2015K-0902	SAL_EA1724AA	SAL_FA7646AA_AS	PRJNA230403	SRP040281	SAMN04054204	SRS1065167	2015-09-09	2015-09-11	Human	Human	Age: 20-29; stool	2015	7			North America	United States							Javiana (Predicted)					EDLB-CDC		Javiana	D1	l,z28	1,5	Javiana	9	l,z28	1,5	24	17	Javiana	Lineage 3		13	12	17	16	13
SAL_EA2223AA	2015K-0956	SAL_EA2223AA	SAL_HA8760AA_AS	PRJNA230403	SRP040281	SAMN04100100	SRS1079280	2015-09-18	2015-09-21								North America	United States							Javiana (Predicted)					EDLB-CDC		Javiana	D1	l,z28	1,5	Javiana	9	l,z28	1,5	24	17	Javiana	Lineage 3		13	12	17	16	13
SAL_EA2386AA	FLDOH-116	SAL_EA2386AA	SAL_IA2702AA_AS	PRJNA183848	SRP028812	SAMN04096828	SRS1093281	2015-10-01	2015-10-01	Human	Human	Homo sapiens; Age: 60-69; urine	2015	7			North America	United States	Florida						Javiana					Food and Drug Administration (US)		Javiana	B	l,z28	1,5		9,46	l,z28	1,5	24	17	Javiana	Lineage 3		13	12	17	16	13
SAL_EA2387AA	FLDOH-115	SAL_EA2387AA	SAL_JA8281AA_AS	PRJNA183848	SRP028812	SAMN04096761	SRS1093283	2015-10-01	2015-10-01	Human	Human	Homo sapiens; Age: 20-29; stool	2015	6			North America	United States	Florida						Javiana					Food and Drug Administration (US)		Javiana	D1	l,z28	1,5	Javiana	9	l,z28	1,5	24	17	Javiana	Lineage 3		13	12	17	16	13
SAL_EA2388AA	FLDOH-114	SAL_EA2388AA	SAL_IA3611AA_AS	PRJNA183848	SRP028812	SAMN04096704	SRS1093277	2015-10-01	2015-10-01	Human	Human	Homo sapiens; Age: 0-4; stool	2015	6			North America	United States	Florida						Javiana (Predicted)					FDA		Javiana	D1	l,z28	1,5	Javiana	9	l,z28	1,5	24	17	Javiana	Lineage 3		13	12	17	16	13
SAL_EA2389AA	FLDOH-113	SAL_EA2389AA	SAL_IA3613AA_AS	PRJNA183848	SRP028812	SAMN04096812	SRS1093279	2015-10-01	2015-10-01	Human	Human	Homo sapiens; Age: 0-4; stool	2015	7			North America	United States	Florida						Javiana					Food and Drug Administration (US)		Javiana	D1	l,z28	1,5		9,46	l,z28	1,5	24	17	Javiana	Lineage 3		13	12	17	16	13
SAL_EA2390AA	FLDOH-112	SAL_EA2390AA	SAL_JA8329AA_AS	PRJNA183848	SRP028812	SAMN04096752	SRS1093272	2015-10-01	2015-10-01	Human	Human	Homo sapiens; Age: 0-4; stool	2015	7			North America	United States	Florida						Javiana					Food and Drug Administration (US)		Javiana	D1	l,z28	1,5	Javiana	9	l,z28	1,5	24	17	Javiana	Lineage 3		13	12	17	16	13
SAL_EA2391AA	FLDOH-111	SAL_EA2391AA	SAL_IA3614AA_AS	PRJNA183848	SRP028812	SAMN04096565	SRS1093273	2015-10-01	2015-10-01	Human	Human	Homo sapiens; Age: 5-9; stool	2015	6			North America	United States	Florida						Javiana (Predicted)					Food and Drug Administration (US)		Javiana	D1	l,z28	1,5		9,46	l,z28	1,5	24	17	Javiana	Lineage 3		13	12	17	16	13
SAL_EA2394AA	FLDOH-110	SAL_EA2394AA	SAL_JA8354AA_AS	PRJNA183848	SRP028812	SAMN04096853	SRS1093271	2015-10-01	2015-10-01	Human	Human	Homo sapiens; Age: 30-39; stool	2015	7			North America	United States	Florida						Javiana					Food and Drug Administration (US)		Javiana	D1	l,z28	1,5	Javiana	9	l,z28	1,5	24	17	Javiana	Lineage 3		13	12	17	16	13
SAL_EA2395AA	FLDOH-109	SAL_EA2395AA	SAL_HA9356AA_AS	PRJNA183848	SRP028812	SAMN04096743	SRS1093268	2015-10-01	2015-10-01	Human	Human	Homo sapiens; Age: 20-29; stool	2015	6			North America	United States	Florida						Serotype Pending					FDA		Javiana	D1	l,z28	1,5	Javiana	9	l,z28	1,5	24	17	Javiana	Lineage 3		13	12	17	16	13
SAL_EA2396AA	FLDOH-108	SAL_EA2396AA	SAL_IA2632AA_AS	PRJNA183848	SRP028812	SAMN04096632	SRS1093269	2015-10-01	2015-10-01	Human	Human	Homo sapiens; Age: 60-69; stool					North America	United States	Florida						Javiana					Food and Drug Administration (US)		Javiana	B	l,z28	1,5		-	l,z28	1,5	24	17	Javiana	Lineage 3		13	12	17	16	13
SAL_EA2397AA	FLDOH-107	SAL_EA2397AA	SAL_IA3617AA_AS	PRJNA183848	SRP028812	SAMN04096784	SRS1093266	2015-10-01	2015-10-01	Human	Human	Homo sapiens; Age: 0-4; stool	2015	7			North America	United States	Florida						Serotype Pending					FDA		Javiana	D1	l,z28	1,5	Javiana	9	l,z28	1,5	24	17	Javiana	Lineage 3		13	12	17	16	13
SAL_EA2398AA	FLDOH-106	SAL_EA2398AA	SAL_IA2568AA_AS	PRJNA183848	SRP028812	SAMN04096735	SRS1093264	2015-10-01	2015-10-01	Human	Human	Homo sapiens; Age: 5-9; stool	2015	7			North America	United States	Florida						Javiana					Food and Drug Administration (US)		Javiana	D1	l,z28	1,5		-	l,z28	1,5	24	17	Javiana	Lineage 3		13	12	17	16	13
SAL_EA2399AA	FLDOH-105	SAL_EA2399AA	SAL_HA7044AA_AS	PRJNA183848	SRP028812	SAMN04096562	SRS1093265	2015-10-01	2015-10-01	Human	Human	Homo sapiens; Age: 0-4; stool	2015	5			North America	United States	Florida						Serotype Pending					FDA		Javiana	B	l,z28	1,5		-	l,z28	1,5	24	17	Javiana	Lineage 3		13	12	17	16	13
SAL_EA2467AA	FDA245645	SAL_EA2467AA	SAL_JA8289AA_AS	PRJNA186035	SRP018785	SAMN02843880	SRS1093162	2015-10-01	2015-10-01	Aquatic Animal	Fish	speckled trout	2003	8			North America	Mexico							Javiana	I				Food and Drug Administration (US)		Javiana	D1	l,z28	1,5	Javiana	9	l,z28	1,5	2944	17	Javiana	Lineage 3		13	12	17	747	13
SAL_EA2771AA	PNUSAS000957	SAL_EA2771AA	SAL_IA3681AA_AS	PRJNA230403	SRP040281	SAMN04156876	SRS1109879	2015-10-12	2015-10-09	Human	Human	Age: 30-39; stool	2015	9			North America	United States							Javiana					Centers for Disease Control and Prevention - PulseNet		Javiana	D1	l,z28	1,5	Javiana	9	l,z28	1,5	24	17	Javiana	Lineage 3		13	12	17	16	13
SAL_EA2772AA	PNUSAS000958	SAL_EA2772AA	SAL_IA3682AA_AS	PRJNA230403	SRP040281	SAMN04156877	SRS1109880	2015-10-12	2015-10-09	Human	Human	Age: 10-19; stool	2015	8			North America	United States							Javiana					Centers for Disease Control and Prevention - PulseNet		Javiana	D1	l,z28	1,5	Javiana	9	l,z28	1,5	24	17	Javiana	Lineage 3		13	12	17	16	13
SAL_EA2812AA	FDA575938	SAL_EA2812AA	SAL_IA2618AA_AS	PRJNA186035	SRP018785	SAMN02844768	SRS1108601	2015-10-12	2015-10-09	Wild Animal	ND/Others	toad	2009				North America	Mexico							Javiana	I				Food and Drug Administration (US)		Javiana	D1	l,z28	1,5	Javiana	9	l,z28	1,5	24	17	Javiana	Lineage 3		13	12	17	16	13
SAL_EA2819AA	FDA575797	SAL_EA2819AA	SAL_IA2753AA_AS	PRJNA186035	SRP018785	SAMN01933192	SRS1108585	2015-10-12	2015-10-09	Human	Human	clinical	2009	7			North America	Mexico							Javiana	I				Food and Drug Administration (US)		Javiana	B	l,z28	1,5		-	l,z28	1,5	24	17	Javiana	Lineage 3		13	12	17	16	13
SAL_EA2866AA	FDA207489-51	SAL_EA2866AA	SAL_IA3756AA_AS	PRJNA186035	SRP018785	SAMN02845232	SRS1108547	2015-10-12	2015-10-09	Aquatic Animal	Fish	frozen sand goby fish	2002	12			Asia	Vietnam							Javiana (Predicted)					Food and Drug Administration (US)		Javiana	B	l,z28	1,5	Javiana	9	l,z28	1,5	1547	17	Javiana	Lineage 3		60	12	17	16	13
SAL_EA2895AA	FDA862988 1-TT/HE-1	SAL_EA2895AA	SAL_IA1747AA_AS	PRJNA186035	SRP018785	SAMN02919099	SRS1108522	2015-10-12	2015-10-09	Food	Plant	chilli powder hot	2014	5			Asia	India							Javiana (Predicted)					FDA/CFSAN		Panama	D1	l,z28	1,5	Javiana	9	l,z28	1,5	2494	17	Javiana	Lineage 3		60	429	17	662	13
SAL_EA2920AA	FDA656972 64-5	SAL_EA2920AA	SAL_IA1826AA_AS	PRJNA186035	SRP018785	SAMN02847139	SRS1108494	2015-10-12	2015-10-09	Environment	Soil/Dust	swab	2011	11			North America	United States	New Mexico						Javiana	I				FDA		Javiana	D1	l,z28	1,5	Javiana	9	l,z28	1,5	24	17	Javiana	Lineage 3		13	12	17	16	13
SAL_EA2921AA	FCC0010	SAL_EA2921AA	SAL_IA3789AA_AS	PRJNA186035	SRP018785	SAMN02345049	SRS1108495	2015-10-12	2015-10-09	Environment	Soil/Dust	swab	2010	12			North America	United States	New Mexico						Javiana	I				Food and Drug Administration (US)		Javiana	D1	l,z28	1,5	Javiana	9	l,z28	1,5	24	17	Javiana	Lineage 3		13	12	17	16	13
SAL_EA3074AA	OSF032727	SAL_EA3074AA	SAL_IA3882AA_AS	PRJNA186035	SRP018785	SAMN03573429	SRS1120784	2015-10-20	2015-01-01	Environment	Soil/Dust	environmental swab	2013	10			North America	United States	Georgia						Javiana (Predicted)					Food and Drug Administration - Center for Food Safety and Applied Nutrition (US)		Javiana	D1	l,z28	1,5		9,46	l,z28	1,5	24	17	Javiana	Lineage 3		13	12	17	16	13
SAL_EA3307AA	2015K-1099	SAL_EA3307AA	SAL_IA1074AA_AS	PRJNA230403	SRP040281	SAMN04201823	SRS1124660	2015-10-22	2015-10-21								North America	United States							Javiana (Predicted)					Centers for Disease Control and Prevention Enteric Diseases Laboratory Branch		Javiana	D1	l,z28	1,5	Javiana	9	l,z28	1,5	24	17	Javiana	Lineage 3		13	12	17	16	13
SAL_EA3932AA	2015K-1086	SAL_EA3932AA	SAL_IA4205AA_AS	PRJNA230403	SRP040281	SAMN04147786	SRS1101821	2015-10-23	2015-10-06								North America	United States							Javiana (Predicted)					Centers for Disease Control and Prevention Enteric Diseases Laboratory Branch		Javiana	D1	l,z28	1,5	Javiana	9	l,z28	1,5	24	17	Javiana	Lineage 3		13	12	17	16	13
SAL_EA4030AA	FDA575788	SAL_EA4030AA	SAL_IA5015AA_AS	PRJNA186035	SRP018785	SAMN02844757	SRS1099896	2015-10-29	2015-10-09	Environment	Soil/Dust	field	2009				North America	Mexico							Javiana	I				Food and Drug Administration (US)		Javiana	B	l,z28	1,5		-	l,z28	1,5	24	17	Javiana	Lineage 3		13	12	17	16	13
SAL_EA4031AA	FDA575795	SAL_EA4031AA	SAL_IA5016AA_AS	PRJNA186035	SRP018785	SAMN02844759	SRS1099897	2015-10-29	2015-10-09	Wild Animal	Amphibian	toad	2009				North America	Mexico							Javiana	I				Food and Drug Administration (US)		Javiana	B	l,z28	1,5		-	l,z28	1,5	24	17	Javiana	Lineage 3		13	12	17	16	13
SAL_EA4033AA	FDA575805	SAL_EA4033AA	SAL_IA5018AA_AS	PRJNA186035	SRP018785	SAMN02844761	SRS1099899	2015-10-29	2015-10-09	Wild Animal	ND/Others	toad	2009				North America	Mexico							Javiana	I				Food and Drug Administration (US)		Javiana	B	l,z28	1,5		-	l,z28	1,5	24	17	Javiana	Lineage 3		13	12	17	16	13
SAL_EA4034AA	FDA575807	SAL_EA4034AA	SAL_IA5019AA_AS	PRJNA186035	SRP018785	SAMN02844762	SRS1099900	2015-10-29	2015-10-09	Wild Animal	Amphibian	toad	2009				North America	Mexico							Javiana					Food and Drug Administration (US)		Javiana	D1	l,z28	1,5	Javiana	9	l,z28	1,5	24	17	Javiana	Lineage 3		13	12	17	16	13
SAL_EA4080AA	CFSAN037834	SAL_EA4080AA	SAL_IA5081AA_AS	PRJNA215355	SRP028928	SAMN04096718	SRS1079688	2015-10-29	2015-09-27	Environment	Plant	cucumbers	2015	8			North America	United States	Maryland						Javiana (Predicted)					Food and Drug Administration (US)		Javiana	D1	l,z28	1,5	Javiana	9	l,z28	1,5	24	17	Javiana	Lineage 3		13	12	17	16	13
SAL_EA4081AA	CFSAN037833	SAL_EA4081AA	SAL_IA5082AA_AS	PRJNA215355	SRP028928	SAMN04096875	SRS1079681	2015-10-29	2015-09-27	Environment	Plant	cucumbers	2015	8			North America	United States	Maryland						Javiana (Predicted)					FDA		Javiana	D1	l,z28	1,5	Javiana	9	l,z28	1,5	24	17	Javiana	Lineage 3		13	12	17	16	13
SAL_EA4082AA	CFSAN037832	SAL_EA4082AA	SAL_IA5083AA_AS	PRJNA215355	SRP028928	SAMN04096766	SRS1079682	2015-10-29	2015-09-27	Environment	Plant	cucumbers	2015	8			North America	United States	Maryland						Javiana (Predicted)					FDA		Javiana	D1	l,z28	1,5	Javiana	9	l,z28	1,5	24	17	Javiana	Lineage 3		13	12	17	16	13
SAL_EA4083AA	CFSAN037831	SAL_EA4083AA	SAL_IA5084AA_AS	PRJNA215355	SRP028928	SAMN04096709	SRS1079683	2015-10-29	2015-09-27	Environment	Plant	cucumbers	2015	8			North America	United States	Maryland						Javiana (Predicted)					FDA		Javiana	D1	l,z28	1,5	Javiana	9	l,z28	1,5	24	17	Javiana	Lineage 3		13	12	17	16	13
SAL_EA4084AA	CFSAN037830	SAL_EA4084AA	SAL_IA5085AA_AS	PRJNA215355	SRP028928	SAMN04096863	SRS1079685	2015-10-29	2015-09-27	Environment	Plant	cucumbers	2015	8			North America	United States	Maryland						Javiana (Predicted)					FDA		Javiana	D1	l,z28	1,5	Javiana	9	l,z28	1,5	24	17	Javiana	Lineage 3		13	12	17	16	13
SAL_EA4085AA	CFSAN037829	SAL_EA4085AA	SAL_IA5086AA_AS	PRJNA215355	SRP028928	SAMN04096776	SRS1079677	2015-10-29	2015-09-27	Environment	Plant	cucumbers	2015	8			North America	United States	Maryland						Javiana (Predicted)					FDA		Javiana	D1	l,z28	1,5	Javiana	9	l,z28	1,5	24	17	Javiana	Lineage 3		13	12	17	16	13
SAL_EA4086AA	CFSAN037828	SAL_EA4086AA	SAL_IA5087AA_AS	PRJNA215355	SRP028928	SAMN04096685	SRS1079678	2015-10-29	2015-09-27	Environment	Plant	cucumbers	2015	8			North America	United States	Maryland						Javiana (Predicted)					FDA		Javiana	D1	l,z28	1,5	Javiana	9	l,z28	1,5	24	17	Javiana	Lineage 3		13	12	17	16	13
SAL_EA4087AA	CFSAN037827	SAL_EA4087AA	SAL_IA5088AA_AS	PRJNA215355	SRP028928	SAMN04096854	SRS1079679	2015-10-29	2015-09-27	Environment	Plant	cucumbers	2015	8			North America	United States	Maryland						Javiana (Predicted)					FDA		Javiana	D1	l,z28	1,5	Javiana	9	l,z28	1,5	24	17	Javiana	Lineage 3		13	12	17	16	13
SAL_EA4088AA	CFSAN037826	SAL_EA4088AA	SAL_IA5089AA_AS	PRJNA215355	SRP028928	SAMN04096742	SRS1079680	2015-10-29	2015-09-27	Environment	Plant	cucumbers	2015	8			North America	United States	Maryland						Javiana (Predicted)					FDA		Javiana	D1	l,z28	1,5	Javiana	9	l,z28	1,5	24	17	Javiana	Lineage 3		13	12	17	16	13
SAL_EA4666AA	OSF033262	SAL_EA4666AA	SAL_IA7029AA_AS	PRJNA186035	SRP018785	SAMN03702085	SRS1144627	2015-11-04	2015-01-01	Environment	Water/River	water	2014	9			North America	United States	Washington						Javiana (Predicted)					Food and Drug Administration - Center for Food Safety and Applied Nutrition (US)		Javiana	B	l,z28	1,5		9,46	l,z28	1,5	24	17	Javiana	Lineage 3		13	12	17	16	13
SAL_EA4688AA	OSF033286	SAL_EA4688AA	SAL_IA7051AA_AS	PRJNA186035	SRP018785	SAMN03702109	SRS1144614	2015-11-04	2015-01-01	Environment	Plant	leafy greens	2014	10			North America	United States	California						Javiana (Predicted)					Food and Drug Administration - Center for Food Safety and Applied Nutrition (US)		Javiana	D1	l,z28	1,5	Javiana	9	l,z28	1,5	24	17	Javiana	Lineage 3		13	12	17	16	13
SAL_EA4804AA	FDA854459-1	SAL_EA4804AA	SAL_IA9487AA_AS	PRJNA186035	SRP018785	SAMN04221437	SRS1153385	2015-11-06	2015-01-01	Environment	Soil/Dust	environmental swab	2015	10			North America	United States	New Mexico						Javiana (Predicted)					CFSAN		Javiana	D1	l,z28	1,5	Javiana	9	l,z28	1,5	24	17	Javiana	Lineage 3		13	12	17	16	13
SAL_EA4932AA	CFSAN037809	SAL_EA4932AA	SAL_JA8440AA_AS	PRJNA215355	SRP028928	SAMN04096726	SRS1157431	2015-11-11	2015-01-01	Environment	Plant	cucumbers	2015	8			North America	United States	Maryland						Javiana (Predicted)					FDA		Javiana	D1	l,z28	1,5	Javiana	9	l,z28	1,5	24	17	Javiana	Lineage 3		13	12	17	16	13
SAL_EA4933AA	CFSAN037808	SAL_EA4933AA	SAL_JA8441AA_AS	PRJNA215355	SRP028928	SAMN04096653	SRS1157428	2015-11-11	2015-01-01	Environment	Plant	cucumbers	2015	8			North America	United States	Maryland						Javiana (Predicted)					FDA		Javiana	D1	l,z28	1,5	Javiana	9	l,z28	1,5	24	17	Javiana	Lineage 3		13	12	17	16	13
SAL_EA4934AA	CFSAN037807	SAL_EA4934AA	SAL_JA8442AA_AS	PRJNA215355	SRP028928	SAMN04096789	SRS1157429	2015-11-11	2015-01-01	Environment	Plant	cucumbers	2015	8			North America	United States	Maryland						Javiana (Predicted)					Food and Drug Administration - Center for Food Safety and Applied Nutrition (US)		Javiana	D1	l,z28	1,5	Javiana	9	l,z28	1,5	24	17	Javiana	Lineage 3		13	12	17	16	13
SAL_EA4935AA	CFSAN037806	SAL_EA4935AA	SAL_JA8443AA_AS	PRJNA215355	SRP028928	SAMN04096739	SRS1157430	2015-11-11	2015-01-01	Environment	Plant	cucumbers	2015	8			North America	United States	Maryland						Javiana (Predicted)					FDA		Javiana	D1	l,z28	1,5	Javiana	9	l,z28	1,5	24	17	Javiana	Lineage 3		13	12	17	16	13
SAL_EA4936AA	CFSAN037805	SAL_EA4936AA	SAL_JA8444AA_AS	PRJNA215355	SRP028928	SAMN04096873	SRS1157427	2015-11-11	2015-01-01	Environment	Plant	cucumbers	2015	8			North America	United States	Maryland						Javiana (Predicted)					FDA		Javiana	D1	l,z28	1,5	Javiana	9	l,z28	1,5	24	17	Javiana	Lineage 3		13	12	17	16	13
SAL_EA4937AA	CFSAN037804	SAL_EA4937AA	SAL_JA8445AA_AS	PRJNA215355	SRP028928	SAMN04096762	SRS1157426	2015-11-11	2015-01-01	Environment	Plant	cucumbers	2015	8			North America	United States	Maryland						Javiana (Predicted)					FDA		Javiana	D1	l,z28	1,5	Javiana	9	l,z28	1,5	24	17	Javiana	Lineage 3		13	12	17	16	13
SAL_EA4938AA	CFSAN037803	SAL_EA4938AA	SAL_JA8446AA_AS	PRJNA215355	SRP028928	SAMN04096733	SRS1157424	2015-11-11	2015-01-01	Environment	Plant	cucumbers	2015	8			North America	United States	Maryland						Javiana (Predicted)					FDA		Javiana	D1	l,z28	1,5	Javiana	9	l,z28	1,5	24	17	Javiana	Lineage 3		13	12	17	16	13
SAL_EA4939AA	CFSAN037802	SAL_EA4939AA	SAL_JA8447AA_AS	PRJNA215355	SRP028928	SAMN04096862	SRS1157425	2015-11-11	2015-01-01	Environment	Plant	cucumbers	2015	8			North America	United States	Maryland						Javiana (Predicted)					FDA		Javiana	D1	l,z28	1,5	Javiana	9	l,z28	1,5	24	17	Javiana	Lineage 3		13	12	17	16	13
SAL_EA5016AA	PNUSAS001133	SAL_EA5016AA	SAL_JA8539AA_AS	PRJNA230403	SRP040281	SAMN04221451	SRS1159809	2015-11-13	2015-11-12	Human	Human	Age: 70-79; stool	2015	10			North America	United States							Javiana					PulseNet Next Generation Subtyping Methods Unit		Javiana	D1	l,z28	1,5	Javiana	9	l,z28	1,5	24	17	Javiana	Lineage 3		13	12	17	16	13
SAL_EA5017AA	PNUSAS001132	SAL_EA5017AA	SAL_JA8540AA_AS	PRJNA230403	SRP040281	SAMN04221450	SRS1159806	2015-11-13	2015-11-12	Human	Human	Age: 20-29; stool	2015	9			North America	United States							Javiana					Centers for Disease Control and Prevention - PulseNet		Javiana	D1	l,z28	1,5	Javiana	9	l,z28	1,5	24	17	Javiana	Lineage 3		13	12	17	16	13
SAL_EA5018AA	PNUSAS001131	SAL_EA5018AA	SAL_JA8541AA_AS	PRJNA230403	SRP040281	SAMN04221449	SRS1159807	2015-11-13	2015-11-12	Human	Human	Age: 10-19; stool	2015	8			North America	United States							Javiana					PulseNet Next Generation Subtyping Methods Unit		Javiana	D1	l,z28	1,5	Javiana	9	l,z28	1,5	24	17	Javiana	Lineage 3		13	12	17	16	13
SAL_EA5019AA	PNUSAS001096	SAL_EA5019AA	SAL_JA8542AA_AS	PRJNA230403	SRP040281	SAMN04229839	SRS1159803	2015-11-13	2015-11-12								North America	United States							Javiana (Predicted)					Centers for Disease Control and Prevention - PulseNet		Javiana	B	l,z28	1,5		-	l,z28	1,5	24	17	Javiana	Lineage 3		13	12	17	16	13
SAL_EA5020AA	PNUSAS001095	SAL_EA5020AA	SAL_JA8543AA_AS	PRJNA230403	SRP040281	SAMN04229838	SRS1159804	2015-11-13	2015-11-12								North America	United States							Javiana (Predicted)					PulseNet Next Generation Subtyping Methods Unit		Javiana	B	l,z28	1,5		-	l,z28	1,5	24	17	Javiana	Lineage 3		13	12	17	16	13
SAL_EA5021AA	PNUSAS001092	SAL_EA5021AA	SAL_JA8544AA_AS	PRJNA230403	SRP040281	SAMN04229541	SRS1159805	2015-11-13	2015-11-12	Human	Human	Age: 40-49; stool	2015	8			North America	United States							Javiana					Centers for Disease Control and Prevention - PulseNet		Javiana	D1	l,z28	1,5	Javiana	9	l,z28	1,5	24	17	Javiana	Lineage 3		13	12	17	16	13
SAL_EA5064AA	PNUSAS001091	SAL_EA5064AA	SAL_JA8587AA_AS	PRJNA230403	SRP040281	SAMN04230428	SRS1159527	2015-11-13	2015-11-12	Human	Human	Age: 70-79; stool	2015	8			North America	United States							Javiana					Centers for Disease Control and Prevention - PulseNet		Javiana	D1	l,z28	1,5	Javiana	9	l,z28	1,5	24	17	Javiana	Lineage 3		13	12	17	16	13
SAL_EA5065AA	PNUSAS001090	SAL_EA5065AA	SAL_JA8588AA_AS	PRJNA230403	SRP040281	SAMN04208094	SRS1159528	2015-11-13	2015-11-12	Human	Human	Age: 5-9; stool	2015	9			North America	United States							Javiana					PulseNet Next Generation Subtyping Methods Unit		Javiana	D1	l,z28	1,5	Javiana	9	l,z28	1,5	24	17	Javiana	Lineage 3		13	12	17	16	13
SAL_EA5066AA	PNUSAS001089	SAL_EA5066AA	SAL_JA8589AA_AS	PRJNA230403	SRP040281	SAMN04208093	SRS1159543	2015-11-13	2015-11-12	Human	Human	Age: 40-49; stool	2015	9			North America	United States							Javiana					Centers for Disease Control and Prevention - PulseNet		Javiana	D1	l,z28	1,5	Javiana	9	l,z28	1,5	24	17	Javiana	Lineage 3		13	12	17	16	13
SAL_EA5073AA	PNUSAS001088	SAL_EA5073AA	SAL_JA8596AA_AS	PRJNA230403	SRP040281	SAMN04208092	SRS1159518	2015-11-13	2015-11-12	Human	Human	Age: 0-4; stool	2015	8			North America	United States							Javiana					Centers for Disease Control and Prevention - PulseNet		Javiana	D1	l,z28	1,5	Javiana	9	l,z28	1,5	24	17	Javiana	Lineage 3		13	12	17	16	13
SAL_EA5092AA	2015K-1155	SAL_EA5092AA	SAL_JA8615AA_AS	PRJNA230403	SRP040281	SAMN04262455	SRS1159428	2015-11-13	2015-11-12								North America	United States							Javiana (Predicted)					Centers for Disease Control and Prevention Enteric Diseases Laboratory Branch		Javiana	D1	l,z28	1,5	Javiana	9	l,z28	1,5	24	17	Javiana	Lineage 3		13	12	17	16	13
SAL_EA5093AA	2015K-1156	SAL_EA5093AA	SAL_JA8616AA_AS	PRJNA230403	SRP040281	SAMN04262454	SRS1159429	2015-11-13	2015-11-12								North America	United States							Javiana (Predicted)					Centers for Disease Control and Prevention Enteric Diseases Laboratory Branch		Javiana	D1	l,z28	1,5	Javiana	9	l,z28	1,5	24	17	Javiana	Lineage 3		13	12	17	16	13
SAL_EA5121AA	2015K-1154	SAL_EA5121AA	SAL_JA8644AA_AS	PRJNA230403	SRP040281	SAMN04262336	SRS1159321	2015-11-13	2015-11-12								North America	United States							Javiana (Predicted)					Centers for Disease Control and Prevention Enteric Diseases Laboratory Branch		Javiana	D1	l,z28	1,5	Javiana	9	l,z28	1,5	24	17	Javiana	Lineage 3		13	12	17	16	13
SAL_EA5145AA	FDA926150-31	SAL_EA5145AA	SAL_JA8668AA_AS	PRJNA186035	SRP018785	SAMN04244070	SRS1161474	2015-11-15	2015-01-01	Environment	Soil/Dust	environmental swab	2015	10			North America	United States	New Mexico						Javiana (Predicted)					CFSAN		Javiana	D1	l,z28	1,5	Javiana	9	l,z28	1,5	24	17	Javiana	Lineage 3		13	12	17	16	13
SAL_EA5146AA	FDA926150-29	SAL_EA5146AA	SAL_JA8669AA_AS	PRJNA186035	SRP018785	SAMN04244069	SRS1161476	2015-11-15	2015-01-01	Environment	Soil/Dust	environmental swab	2015	10			North America	United States	New Mexico						Javiana (Predicted)					CFSAN		Javiana	D1	l,z28	1,5	Javiana	9	l,z28	1,5	24	17	Javiana	Lineage 3		13	12	17	16	13
SAL_EA5147AA	FDA926150-26	SAL_EA5147AA	SAL_JA8670AA_AS	PRJNA186035	SRP018785	SAMN04244068	SRS1161475	2015-11-15	2015-01-01	Environment	Soil/Dust	environmental swab	2015	10			North America	United States	New Mexico						Javiana (Predicted)					CFSAN		Javiana	D1	l,z28	1,5	Javiana	9	l,z28	1,5	24	17	Javiana	Lineage 3		13	12	17	16	13
SAL_EA5149AA	FDA926150-17	SAL_EA5149AA	SAL_JA8672AA_AS	PRJNA186035	SRP018785	SAMN04244066	SRS1161470	2015-11-15	2015-01-01	Environment	Soil/Dust	environmental swab	2015	10			North America	United States	New Mexico						Javiana (Predicted)					CFSAN		Javiana	D1	l,z28	1,5	Javiana	9	l,z28	1,5	24	17	Javiana	Lineage 3		13	12	17	16	13
SAL_EA5151AA	FDA926150-9	SAL_EA5151AA	SAL_JA8674AA_AS	PRJNA186035	SRP018785	SAMN04244063	SRS1161471	2015-11-15	2015-01-01	Environment	Soil/Dust	environmental swab	2015	10			North America	United States	New Mexico						Javiana (Predicted)					CFSAN		Javiana	D1	l,z28	1,5	Javiana	9	l,z28	1,5	24	17	Javiana	Lineage 3		13	12	17	16	13
SAL_EA5152AA	FDA926150-6	SAL_EA5152AA	SAL_JA8675AA_AS	PRJNA186035	SRP018785	SAMN04244062	SRS1161461	2015-11-15	2015-01-01	Environment	Soil/Dust	environmental swab	2015	10			North America	United States	New Mexico						Javiana (Predicted)					CFSAN		Javiana	D1	l,z28	1,5	Javiana	9	l,z28	1,5	24	17	Javiana	Lineage 3		13	12	17	16	13
SAL_EA5153AA	FDA926150-4	SAL_EA5153AA	SAL_JA8676AA_AS	PRJNA186035	SRP018785	SAMN04244061	SRS1161462	2015-11-15	2015-01-01	Environment	Soil/Dust	environmental swab	2015	10			North America	United States	New Mexico						Javiana (Predicted)					CFSAN		Javiana	D1	l,z28	1,5	Javiana	9	l,z28	1,5	24	17	Javiana	Lineage 3		13	12	17	16	13
SAL_EA5154AA	FDA926150-2	SAL_EA5154AA	SAL_JA8677AA_AS	PRJNA186035	SRP018785	SAMN04244060	SRS1161463	2015-11-15	2015-01-01	Environment	Soil/Dust	environmental swab	2015	10			North America	United States	New Mexico						Javiana (Predicted)					CFSAN		Javiana	D1	l,z28	1,5	Javiana	9	l,z28	1,5	24	17	Javiana	Lineage 3		13	12	17	16	13
SAL_EA5260AA	FDA926150-49	SAL_EA5260AA	SAL_JA8785AA_AS	PRJNA186035	SRP018785	SAMN04244076	SRS1169055	2015-11-20	2015-01-01	Environment	Soil/Dust	environmental swab	2015	10			North America	United States	New Mexico						Javiana (Predicted)					CFSAN		Javiana	D1	l,z28	1,5	Javiana	9	l,z28	1,5	24	17	Javiana	Lineage 3		13	12	17	16	13
SAL_EA5261AA	FDA926150-47	SAL_EA5261AA	SAL_JA8786AA_AS	PRJNA186035	SRP018785	SAMN04244075	SRS1169056	2015-11-20	2015-01-01	Environment	Soil/Dust	environmental swab	2015	10			North America	United States	New Mexico						Javiana (Predicted)					CFSAN		Javiana	D1	l,z28	1,5	Javiana	9	l,z28	1,5	24	17	Javiana	Lineage 3		13	12	17	16	13
SAL_EA5262AA	FDA926150-44	SAL_EA5262AA	SAL_JA8787AA_AS	PRJNA186035	SRP018785	SAMN04244074	SRS1169057	2015-11-20	2015-01-01	Environment	Soil/Dust	environmental swab	2015	10			North America	United States	New Mexico						Javiana (Predicted)					CFSAN		Javiana	D1	l,z28	1,5	Javiana	9	l,z28	1,5	24	17	Javiana	Lineage 3		13	12	17	16	13
SAL_EA5264AA	FDA926150-40	SAL_EA5264AA	SAL_JA8789AA_AS	PRJNA186035	SRP018785	SAMN04244072	SRS1169059	2015-11-20	2015-01-01	Environment	Soil/Dust	environmental swab	2015	10			North America	United States	New Mexico						Javiana (Predicted)					CFSAN		Javiana	D1	l,z28	1,5	Javiana	9	l,z28	1,5	24	17	Javiana	Lineage 3		13	12	17	16	13
SAL_EA5386AA	PNUSAS001231	SAL_EA5386AA	SAL_JA9000AA_AS	PRJNA230403	SRP040281	SAMN04295810	SRS1180331	2015-11-26	2015-11-25	Human	Human	Age: 0-4; stool	2015	10			North America	United States							Javiana					PulseNet Next Generation Subtyping Methods Unit		Javiana	D1	l,z28	1,5	Javiana	9	l,z28	1,5	24	17	Javiana	Lineage 3		13	12	17	16	13
SAL_EA5387AA	PNUSAS001230	SAL_EA5387AA	SAL_JA9022AA_AS	PRJNA230403	SRP040281	SAMN04295809	SRS1180332	2015-11-26	2015-11-25	Human	Human	Age: 0-4; stool	2015	8			North America	United States							Javiana					PulseNet Next Generation Subtyping Methods Unit		Javiana	D1	l,z28	1,5	Javiana	9	l,z28	1,5	24	17	Javiana	Lineage 3		13	12	17	16	13
SAL_EA5388AA	PNUSAS001229	SAL_EA5388AA	SAL_JA9079AA_AS	PRJNA230403	SRP040281	SAMN04295808	SRS1180320	2015-11-26	2015-11-25	Human	Human	Age: 0-4; stool	2015	8			North America	United States							Javiana (Predicted)					PulseNet Next Generation Subtyping Methods Unit		Javiana	D1	l,z28	1,5	Javiana	9	l,z28	1,5	24	17	Javiana	Lineage 3		13	12	17	16	13
SAL_EA5389AA	PNUSAS001228	SAL_EA5389AA	SAL_JA9103AA_AS	PRJNA230403	SRP040281	SAMN04295807	SRS1180321	2015-11-26	2015-11-25	Human	Human	Age: 0-4; stool	2014	9			North America	United States							Javiana (Predicted)					Centers for Disease Control and Prevention - PulseNet		Javiana	D1	l,z28	1,5	Javiana	9	l,z28	1,5	24	17	Javiana	Lineage 3		13	12	17	16	13
SAL_EA5390AA	PNUSAS001227	SAL_EA5390AA	SAL_JA9203AA_AS	PRJNA230403	SRP040281	SAMN04295806	SRS1180309	2015-11-26	2015-11-25	Human	Human	Age: 0-4; stool	2013	10			North America	United States							Javiana					Centers for Disease Control and Prevention - PulseNet		Javiana	D1	l,z28	1,5	Javiana	9	l,z28	1,5	24	17	Javiana	Lineage 3		13	12	17	16	13
SAL_EA5392AA	PNUSAS001225	SAL_EA5392AA	SAL_JA9099AA_AS	PRJNA230403	SRP040281	SAMN04295804	SRS1180311	2015-11-26	2015-11-25	Human	Human	Age: 0-4; stool	2012	10			North America	United States							Javiana (Predicted)					PulseNet Next Generation Subtyping Methods Unit		Javiana	D1	l,z28	1,5	Javiana	9	l,z28	1,5	24	17	Javiana	Lineage 3		13	12	17	16	13
SAL_EA5393AA	PNUSAS001224	SAL_EA5393AA	SAL_JA8871AA_AS	PRJNA230403	SRP040281	SAMN04295803	SRS1180312	2015-11-26	2015-11-25	Human	Human	Age: 0-4; stool	2012	9			North America	United States							Javiana (Predicted)					PulseNet Next Generation Subtyping Methods Unit		Javiana	D1	l,z28	1,5	Javiana	9	l,z28	1,5	24	17	Javiana	Lineage 3		13	12	17	16	13
SAL_EA5394AA	PNUSAS001220	SAL_EA5394AA	SAL_JA8870AA_AS	PRJNA230403	SRP040281	SAMN04295799	SRS1180313	2015-11-26	2015-11-25	Human	Human	stool	2012	9			North America	United States							Javiana (Predicted)					PulseNet Next Generation Subtyping Methods Unit		Javiana	D1	l,z28	1,5	Javiana	9	l,z28	1,5	24	17	Javiana	Lineage 3		13	12	17	16	13
SAL_EA5397AA	PNUSAS001222	SAL_EA5397AA	SAL_JA9125AA_AS	PRJNA230403	SRP040281	SAMN04295801	SRS1180317	2015-11-26	2015-11-25	Human	Human	stool	2012	9			North America	United States							Javiana (Predicted)					PulseNet Next Generation Subtyping Methods Unit		Javiana	D1	l,z28	1,5	Javiana	9	l,z28	1,5	24	17	Javiana	Lineage 3		13	12	17	16	13
SAL_EA5516AA	MOD1-Ic-27	SAL_EA5516AA	SAL_JA8943AA_AS	PRJNA186035	SRP018785	SAMN04296439	SRS1183904	2015-11-29	2015-01-01	Wild Animal	Avian	Eudocimus albus; Nestling, white ibis; fecal sample	2013	5			North America	United States	Florida						Javiana					Food and Drug Administration - Center for Food Safety and Applied Nutrition (US)		Javiana	D1	l,z28	1,5	Javiana	9	l,z28	1,5	24	17	Javiana	Lineage 3		13	12	17	16	13
SAL_EA5540AA	MOD1-GC-7	SAL_EA5540AA	SAL_JA9190AA_AS	PRJNA186035	SRP018785	SAMN04296425	SRS1183886	2015-11-29	2015-01-01	Environment	Water/River	Georgia Coast; water	2010				North America	United States	Georgia						Javiana (Predicted)					Food and Drug Administration - Center for Food Safety and Applied Nutrition (US)		Javiana	D1	l,z28	1,5	Javiana	9	l,z28	1,5	24	17	Javiana	Lineage 3		13	12	17	16	13
SAL_EA5543AA	MOD1-GC-8	SAL_EA5543AA	SAL_JA8973AA_AS	PRJNA186035	SRP018785	SAMN04296426	SRS1183881	2015-11-29	2015-01-01	Environment	Water/River	Georgia Coast; water	2010				North America	United States	Georgia						Javiana (Predicted)					Food and Drug Administration - Center for Food Safety and Applied Nutrition (US)		Javiana	D1	l,z28	1,5	Javiana	9	l,z28	1,5	24	17	Javiana	Lineage 3		13	12	17	16	13
SAL_EA5616AA	2015K-0910	SAL_EA5616AA	SAL_JA9143AA_AS	PRJNA230403	SRP040281	SAMN04308852	SRS1186194	2015-12-02	2015-12-02								North America	United States							Javiana (Predicted)					Centers for Disease Control and Prevention - PulseNet		Javiana	D1	l,z28	1,5	Javiana	9	l,z28	1,5	24	17	Javiana	Lineage 3		13	12	17	16	13
SAL_EA5665AA	CFSAN008827	SAL_EA5665AA	SAL_JA9037AA_AS	PRJNA243331	SRP042343	SAMN02900259	SRS1185828	2015-12-02	2015-01-01	Environment	Water/River	water	2012	10			North America	United States	Virginia						Javiana	I				Food and Drug Administration - Center for Food Safety and Applied Nutrition (US)		Javiana	D1	l,z28	1,5	Javiana	9	l,z28	1,5	24	17	Javiana	Lineage 3		13	12	17	16	13
SAL_EA5666AA	CFSAN003372	SAL_EA5666AA	SAL_JA9207AA_AS	PRJNA186035	SRP018785	SAMN03463883	SRS1185829	2015-12-02	2015-01-01	Environment	Water/River	creek water	2011	9			North America	United States	Virginia						Javiana	I				Food and Drug Administration - Center for Food Safety and Applied Nutrition (US)		Javiana	D1	l,z28	1,5	Javiana	9	l,z28	1,5	24	17	Javiana	Lineage 3		13	12	17	16	13
SAL_EA5746AA	CFSAN037824	SAL_EA5746AA	SAL_JA9253AA_AS	PRJNA215355	SRP028928	SAMN04096855	SRS1199576	2015-12-12	2015-01-01	Environment	Plant	cucumbers	2015	8			North America	United States	Maryland						Javiana (Predicted)					FDA		Javiana	D1	l,z28	1,5	Javiana	9	l,z28	1,5	24	17	Javiana	Lineage 3		13	12	17	16	13
SAL_EA5747AA	CFSAN037823	SAL_EA5747AA	SAL_JA9254AA_AS	PRJNA215355	SRP028928	SAMN04096744	SRS1199577	2015-12-12	2015-01-01	Environment	Plant	cucumbers	2015	8			North America	United States	Maryland						Javiana (Predicted)					FDA		Javiana	D1	l,z28	1,5	Javiana	9	l,z28	1,5	24	17	Javiana	Lineage 3		13	12	17	16	13
SAL_EA5748AA	CFSAN037822	SAL_EA5748AA	SAL_JA9255AA_AS	PRJNA215355	SRP028928	SAMN04096644	SRS1199570	2015-12-12	2015-01-01	Environment	Plant	cucumbers	2015	8			North America	United States	Maryland						Javiana (Predicted)					Food and Drug Administration - Center for Food Safety and Applied Nutrition (US)		Javiana	D1	l,z28	1,5	Javiana	9	l,z28	1,5	24	17	Javiana	Lineage 3		13	12	17	16	13
SAL_EA5749AA	CFSAN037821	SAL_EA5749AA	SAL_JA9256AA_AS	PRJNA215355	SRP028928	SAMN04096783	SRS1199571	2015-12-12	2015-01-01	Environment	Plant	cucumbers	2015	8			North America	United States	Maryland						Javiana (Predicted)					FDA		Javiana	D1	l,z28	1,5	Javiana	9	l,z28	1,5	24	17	Javiana	Lineage 3		13	12	17	16	13
SAL_EA5750AA	CFSAN037820	SAL_EA5750AA	SAL_JA9257AA_AS	PRJNA215355	SRP028928	SAMN04096751	SRS1199572	2015-12-12	2015-01-01	Environment	Plant	cucumbers	2015	8			North America	United States	Maryland						Javiana (Predicted)					FDA		Javiana	D1	l,z28	1,5	Javiana	9	l,z28	1,5	24	17	Javiana	Lineage 3		13	12	17	16	13
SAL_EA5751AA	CFSAN037819	SAL_EA5751AA	SAL_JA9258AA_AS	PRJNA215355	SRP028928	SAMN04096558	SRS1199573	2015-12-12	2015-01-01	Environment	Plant	cucumbers	2015	8			North America	United States	Maryland						Javiana (Predicted)					FDA		Javiana	D1	l,z28	1,5	Javiana	9	l,z28	1,5	24	17	Javiana	Lineage 3		13	12	17	16	13
SAL_EA5752AA	CFSAN037818	SAL_EA5752AA	SAL_JA9259AA_AS	PRJNA215355	SRP028928	SAMN04096796	SRS1199574	2015-12-12	2015-01-01	Environment	Plant	cucumbers	2015	8			North America	United States	Maryland						Javiana (Predicted)					FDA		Javiana	D1	l,z28	1,5	Javiana	9	l,z28	1,5	24	17	Javiana	Lineage 3		13	12	17	16	13
SAL_EA5753AA	CFSAN037817	SAL_EA5753AA	SAL_JA9260AA_AS	PRJNA215355	SRP028928	SAMN04096719	SRS1199575	2015-12-12	2015-01-01	Environment	Plant	cucumbers	2015	8			North America	United States	Maryland						Javiana (Predicted)					FDA		Javiana	D1	l,z28	1,5	Javiana	9	l,z28	1,5	24	17	Javiana	Lineage 3		13	12	17	16	13
SAL_EA5754AA	CFSAN037815	SAL_EA5754AA	SAL_JA9261AA_AS	PRJNA215355	SRP028928	SAMN04096731	SRS1199565	2015-12-12	2015-01-01	Environment	Plant	cucumbers	2015	8			North America	United States	Maryland						Javiana (Predicted)					FDA		Javiana	D1	l,z28	1,5	Javiana	9	l,z28	1,5	24	17	Javiana	Lineage 3		13	12	17	16	13
SAL_EA5755AA	CFSAN037814	SAL_EA5755AA	SAL_JA9262AA_AS	PRJNA215355	SRP028928	SAMN04096871	SRS1199555	2015-12-12	2015-01-01	Environment	Plant	cucumbers	2015	8			North America	United States	Maryland						Javiana (Predicted)					FDA		Javiana	D1	l,z28	1,5	Javiana	9	l,z28	1,5	24	17	Javiana	Lineage 3		13	12	17	16	13
SAL_EA5756AA	CFSAN037813	SAL_EA5756AA	SAL_JA9263AA_AS	PRJNA215355	SRP028928	SAMN04096823	SRS1199556	2015-12-12	2015-01-01	Environment	Plant	cucumbers	2015	8			North America	United States	Maryland						Javiana (Predicted)					FDA		Javiana	D1	l,z28	1,5	Javiana	9	l,z28	1,5	24	17	Javiana	Lineage 3		13	12	17	16	13
SAL_EA5757AA	CFSAN037812	SAL_EA5757AA	SAL_JA9264AA_AS	PRJNA215355	SRP028928	SAMN04096661	SRS1199557	2015-12-12	2015-01-01	Environment	Plant	cucumbers	2015	8			North America	United States	Maryland						Javiana (Predicted)					FDA		Javiana	D1	l,z28	1,5	Javiana	9	l,z28	1,5	24	17	Javiana	Lineage 3		13	12	17	16	13
SAL_EA5758AA	CFSAN037811	SAL_EA5758AA	SAL_JA9265AA_AS	PRJNA215355	SRP028928	SAMN04096583	SRS1199558	2015-12-12	2015-01-01	Environment	Plant	cucumbers	2015	8			North America	United States	Maryland						Javiana (Predicted)					FDA		Javiana	D1	l,z28	1,5	Javiana	9	l,z28	1,5	24	17	Javiana	Lineage 3		13	12	17	16	13
SAL_EA5759AA	CFSAN037810	SAL_EA5759AA	SAL_JA9266AA_AS	PRJNA215355	SRP028928	SAMN04096810	SRS1199559	2015-12-12	2015-01-01	Environment	Plant	cucumbers	2015	8			North America	United States	Maryland						Javiana (Predicted)					FDA		Javiana	D1	l,z28	1,5	Javiana	9	l,z28	1,5	24	17	Javiana	Lineage 3		13	12	17	16	13
SAL_EA6018AA	PNUSAS001094	SAL_EA6018AA	SAL_JA9530AA_AS	PRJNA230403	SRP040281	SAMN04221169	SRS1191974	2015-12-12	2015-12-04	Human	Human	Age: 0-4; stool	2015	9			North America	United States							Javiana					PulseNet Next Generation Subtyping Methods Unit		Javiana	D1	l,z28	1,5	Javiana	9	l,z28	1,5	24	17	Javiana	Lineage 3		13	12	17	16	13
SAL_EA6019AA	PNUSAS001093	SAL_EA6019AA	SAL_JA9531AA_AS	PRJNA230403	SRP040281	SAMN04221168	SRS1191975	2015-12-12	2015-12-04	Human	Human	Age: 40-49; stool	2015	9			North America	United States							Javiana					PulseNet Next Generation Subtyping Methods Unit		Javiana	D1	l,z28	1,5	Javiana	9	l,z28	1,5	24	17	Javiana	Lineage 3		13	12	17	16	13
SAL_EA6061AA	2015K-0922	SAL_EA6061AA	SAL_JA9573AA_AS	PRJNA230403	SRP040281	SAMN04317275	SRS1191931	2015-12-12	2015-12-04								North America	United States							Javiana (Predicted)					Centers for Disease Control and Prevention Enteric Diseases Laboratory Branch		Javiana	D1	l,z28	1,5	Javiana	9	l,z28	1,5	24	17	Javiana	Lineage 3		13	12	17	16	13
SAL_EA6107AA	2015K-1332	SAL_EA6107AA	SAL_JA9619AA_AS	PRJNA230403	SRP040281	SAMN04317112	SRS1190507	2015-12-12	2015-12-04								North America	United States							Javiana (Predicted)					Centers for Disease Control and Prevention Enteric Diseases Laboratory Branch		Javiana	D1	l,z28	1,5	Javiana	9	l,z28	1,5	24	17	Javiana	Lineage 3		13	12	17	16	13
SAL_EA6122AA	2015K-1331	SAL_EA6122AA	SAL_JA9634AA_AS	PRJNA230403	SRP040281	SAMN04317038	SRS1190495	2015-12-12	2015-12-04	Human	Human	Age: 40-49; stool	2015	9			North America	United States							Serotype Pending					Centers for Disease Control and Prevention Enteric Diseases Laboratory Branch		Javiana	D1	l,z28	1,5	Javiana	9	l,z28	1,5	24	17	Javiana	Lineage 3		13	12	17	16	13
SAL_EA6193AA	FDA926150-58	SAL_EA6193AA	SAL_JA9705AA_AS	PRJNA186035	SRP018785	SAMN04244079	SRS1187943	2015-12-12	2015-01-01	Environment	Soil/Dust	environmental swab	2015	10			North America	United States	New Mexico						Javiana (Predicted)					CFSAN		Javiana	D1	l,z28	1,5	Javiana	9	l,z28	1,5	24	17	Javiana	Lineage 3		13	12	17	16	13
SAL_EA6303AA	2015K-1395	SAL_EA6303AA	SAL_JA9862AA_AS	PRJNA230403	SRP040281	SAMN04338415	SRS1207300	2015-12-16	2015-12-15	Human	Human	Age: 0-4; stool	2015	9			North America	United States							Javiana (Predicted)					Centers for Disease Control and Prevention Enteric Diseases Laboratory Branch		Javiana	D1	l,z28	1,5	Javiana	9	l,z28	1,5	24	17	Javiana	Lineage 3		13	12	17	16	13
SAL_EA6305AA	2015K-1343	SAL_EA6305AA	SAL_JA9864AA_AS	PRJNA230403	SRP040281	SAMN04338413	SRS1207302	2015-12-16	2015-12-15								North America	United States							Javiana (Predicted)					Centers for Disease Control and Prevention Enteric Diseases Laboratory Branch		Javiana	D1	l,z28	1,5	Javiana	9	l,z28	1,5	24	17	Javiana	Lineage 3		13	12	17	16	13
SAL_EA6322AA	2015K-1366	SAL_EA6322AA	SAL_JA9881AA_AS	PRJNA230403	SRP040281	SAMN04338410	SRS1207249	2015-12-16	2015-12-15	Laboratory	Laboratory	Isolated Organism	2015	8			North America	United States							Javiana					Centers for Disease Control and Prevention Enteric Diseases Laboratory Branch		Javiana	D1	l,z28	1,5	Javiana	9	l,z28	1,5	24	17	Javiana	Lineage 3		13	12	17	16	13
SAL_EA6323AA	2015K-1367	SAL_EA6323AA	SAL_JA9882AA_AS	PRJNA230403	SRP040281	SAMN04338409	SRS1207250	2015-12-16	2015-12-15	Laboratory	Laboratory	Isolated Organism	2015	8			North America	United States							Javiana					Centers for Disease Control and Prevention Enteric Diseases Laboratory Branch		Javiana	D1	l,z28	1,5	Javiana	9	l,z28	1,5	24	17	Javiana	Lineage 3		13	12	17	16	13
SAL_EA6849AA	FDA780913 C1-9	SAL_EA6849AA	SAL_KA0370AA_AS	PRJNA186035	SRP018785	SAMN02847551	SRS1218687	2015-12-23	2015-01-01	Environment	Plant	cantaloupe	2012	10			North America	Mexico							Javiana (Predicted)					US Food and Drug Administration		Javiana	D1	l,z28	1,5	Javiana	9	l,z28	1,5	24	17	Javiana	Lineage 3		13	12	17	16	13
SAL_EA6936AA	43934	SAL_EA6936AA	SAL_KA0461AA_AS	PRJNA248792	SRP042645	SAMN04364154	SRS1220511	2015-12-23	2015-12-22	Human	Human	Homo sapiens; human					Europe	United Kingdom	England	Bournemouth, Christchurch and Poole			50.7413	-1.83309	Javiana	I				Public Health England		Javiana	D1	l,z28	1,5	Javiana	9	l,z28	1,5	24	17	Javiana	Lineage 3		13	12	17	16	13
SAL_EA6953AA	98253	SAL_EA6953AA	SAL_KA0478AA_AS	PRJNA248792	SRP042645	SAMN04364137	SRS1220495	2015-12-23	2015-12-22	Human	Human	Homo sapiens; human					Europe	United Kingdom	England	Bournemouth, Christchurch and Poole			50.7413	-1.83309	Javiana (Predicted)	I				Public Health England		Javiana	D1	l,z28	1,5	Javiana	9	l,z28	1,5	437	17	Javiana	Lineage 3		13	12	63	16	13
SAL_EA7346AA	97867	SAL_EA7346AA	SAL_KA0871AA_AS	PRJNA248792	SRP042645	SAMN04363727	SRS1220045	2015-12-23	2015-12-22	Human	Human	Homo sapiens; human					Europe	United Kingdom	England	Bournemouth, Christchurch and Poole			50.7413	-1.83309	Javiana	I				Public Health England		Javiana	D1	l,z28	1,5	Javiana	9	l,z28	1,5	24	17	Javiana	Lineage 3		13	12	17	16	13
SAL_EA7356AA	91994	SAL_EA7356AA	SAL_KA0881AA_AS	PRJNA248792	SRP042645	SAMN04363715	SRS1220025	2015-12-23	2015-12-22	Human	Human	Homo sapiens; human					Europe	United Kingdom	England	Bournemouth, Christchurch and Poole			50.7413	-1.83309	Javiana	I				Public Health England		Javiana	D1	l,z28	1,5	Javiana	9	l,z28	1,5	1547	17	Javiana	Lineage 3		60	12	17	16	13
SAL_EA7375AA	29250	SAL_EA7375AA	SAL_KA0900AA_AS	PRJNA248792	SRP042645	SAMN04363696	SRS1220006	2015-12-23	2015-12-22	Human	Human	Homo sapiens; human					Europe	United Kingdom	England	Bournemouth, Christchurch and Poole			50.7413	-1.83309	Itami	I				Public Health England		Javiana	D1	l,z28	1,5	Javiana	9	l,z28	1,5	24	17	Javiana	Lineage 3		13	12	17	16	13
SAL_EA7388AA	101424	SAL_EA7388AA	SAL_KA0913AA_AS	PRJNA248792	SRP042645	SAMN04363683	SRS1220124	2015-12-23	2015-12-22	Human	Human	Homo sapiens; human					Europe	United Kingdom	England	Bournemouth, Christchurch and Poole			50.7413	-1.83309	Javiana	I				Public Health England		Javiana	D1	l,z28	1,5	Javiana	9	l,z28	1,5	24	17	Javiana	Lineage 3		13	12	17	16	13
SAL_EA8601AA	POR1-0158	SAL_EA8601AA	SAL_KA2167AA_AS	PRJNA183850	SRP028607	SAMN03838182	SRS1239867	2016-01-08	2015-01-01	Livestock	Swine	Sus scrofa; feces	2014	9			North America	United States	Texas						Javiana (Predicted)	I				FDA/CFSAN/NY_State		Javiana	D1	l,z28	1,5	Javiana	9	l,z28	1,5	24	17	Javiana	Lineage 3		13	12	17	16	13
SAL_EA8674AA	VA-WGS-00650	SAL_EA8674AA	SAL_KA2209AA_AS	PRJNA219491	SRP033708	SAMN04362103	SRS1240137	2016-01-08	2015-01-01	Environment	Water/River	water	2013				North America	United States	Virginia						Javiana (Predicted)					FDA Center for Food Safety and Applied Nutrition		Javiana	D1	l,z28	1,5	Javiana	9	l,z28	1,5	24	17	Javiana	Lineage 3		13	12	17	16	13
SAL_EA8680AA	FDA464126	SAL_EA8680AA	SAL_KA2215AA_AS	PRJNA186035	SRP018785	SAMN02844601	SRS1240653	2016-01-08	2015-01-01	Environment	Plant	peppers	2008	7			North America	Mexico							Javiana	I				FDA/CFSAN		Javiana	D1	l,z28	1,5	Javiana	9	l,z28	1,5	1674	17	Javiana	Lineage 3		13	12	17	520	13
SAL_EA8705AA	PNUSAS001361	SAL_EA8705AA	SAL_KA2498AA_AS	PRJNA230403	SRP040281	SAMN04386673	SRS1243569	2016-01-09	2016-01-08	Human	Human	Age: 60-69; stool	2015	12			North America	United States							I 9,12:-:1,5					PulseNet Next Generation Subtyping Methods Unit		Javiana	D1	l,z28	1,5	Javiana	9	l,z28	1,5	371	17	Javiana	Lineage 3		13	12	17	16	117
SAL_EA8878AA	PNUSAS001377	SAL_EA8878AA	SAL_KA2465AA_AS	PRJNA230403	SRP040281	SAMN04407123	SRS1249557	2016-01-16	2016-01-15	Human	Human	Age: 20-29; stool	2015	10			North America	United States							Javiana					Centers for Disease Control and Prevention - PulseNet		Javiana	D1	l,z28	1,5	Javiana	9	l,z28	1,5	24	17	Javiana	Lineage 3		13	12	17	16	13
SAL_EA9026AA	FDA78181	SAL_EA9026AA	SAL_KA2606AA_AS	PRJNA186035	SRP018785	SAMN04397451	SRS1258555	2016-01-23	2015-01-01	Food	ND/Others	food	1999	12			North America	Trinidad and Tobago							Javiana (Predicted)					FDA Center for Food Safety and Applied Nutrition		Javiana	B	l,z28	1,5		-	l,z28	1,5	1674	17	Javiana	Lineage 3		13	12	17	520	13
SAL_EA9162AA	53091	SAL_EA9162AA	SAL_KA2808AA_AS	PRJNA248792	SRP042645	SAMN04437634	SRS1259659	2016-01-26	2016-01-26	Human	Human	Homo sapiens; human					Europe	United Kingdom	England	Bournemouth, Christchurch and Poole			50.7413	-1.83309		I				Public Health England		Javiana	D1	l,z28	1,5	Javiana	9	l,z28	1,5	371	17	Javiana	Lineage 3		13	12	17	16	117
SAL_EA9387AA	PNUSAS001445	SAL_EA9387AA	SAL_KA2978AA_AS	PRJNA230403	SRP040281	SAMN04442314	SRS1271269	2016-02-03	2016-02-01	Human	Human	Age: 10-19; stool	2015	10			North America	United States							Javiana					Centers for Disease Control and Prevention - PulseNet		Javiana	D1	l,z28	1,5	Javiana	9	l,z28	1,5	24	17	Javiana	Lineage 3		13	12	17	16	13
SAL_EA9393AA	PNUSAS001439	SAL_EA9393AA	SAL_KA2984AA_AS	PRJNA230403	SRP040281	SAMN04442308	SRS1271224	2016-02-03	2016-02-01	Human	Human	Age: 70-79; stool	2015	9			North America	United States							Javiana (Predicted)					PulseNet Next Generation Subtyping Methods Unit		Javiana	D1	l,z28	1,5	Javiana	9	l,z28	1,5	24	17	Javiana	Lineage 3		13	12	17	16	13
SAL_EA9539AA	CFSAN038578	SAL_EA9539AA	SAL_KA3133AA_AS	PRJNA186035	SRP018785	SAMN04096928	SRS1277619	2016-02-06	2015-01-01	Environment	Plant	cucumbers	2015	8			North America	United States	Maryland						Javiana (Predicted)					FDA		Javiana	D1	l,z28	1,5	Javiana	9	l,z28	1,5	24	17	Javiana	Lineage 3		13	12	17	16	13
SAL_EA9543AA	CFSAN038640	SAL_EA9543AA	SAL_KA3137AA_AS	PRJNA186035	SRP018785	SAMN04362471	SRS1277579	2016-02-06	2015-01-01	Environment	Plant	cucumbers	2015	8			North America	United States	Delaware						Javiana (Predicted)					FDA Center for Food Safety and Applied Nutrition		Javiana	D1	l,z28	1,5	Javiana	9	l,z28	1,5	24	17	Javiana	Lineage 3		13	12	17	16	13
SAL_EA9544AA	CFSAN038639	SAL_EA9544AA	SAL_KA3138AA_AS	PRJNA186035	SRP018785	SAMN04362470	SRS1277602	2016-02-06	2015-01-01	Environment	Plant	cucumbers	2015	8			North America	United States	Delaware						Javiana (Predicted)					FDA Center for Food Safety and Applied Nutrition		Javiana	D1	l,z28	1,5	Javiana	9	l,z28	1,5	24	17	Javiana	Lineage 3		13	12	17	16	13
SAL_EA9545AA	CFSAN038637	SAL_EA9545AA	SAL_KA3139AA_AS	PRJNA186035	SRP018785	SAMN04362469	SRS1277603	2016-02-06	2015-01-01	Environment	Plant	cucumbers	2015	8			North America	United States	Maryland						Javiana (Predicted)					FDA Center for Food Safety and Applied Nutrition		Javiana	D1	l,z28	1,5	Javiana	9	l,z28	1,5	24	17	Javiana	Lineage 3		13	12	17	16	13
SAL_EA9546AA	CFSAN038636	SAL_EA9546AA	SAL_KA3141AA_AS	PRJNA186035	SRP018785	SAMN04362468	SRS1277604	2016-02-06	2015-01-01	Environment	Plant	cucumbers	2015	8			North America	United States	Maryland						Javiana (Predicted)					FDA Center for Food Safety and Applied Nutrition		Javiana	D1	l,z28	1,5	Javiana	9	l,z28	1,5	24	17	Javiana	Lineage 3		13	12	17	16	13
SAL_EA9547AA	CFSAN038634	SAL_EA9547AA	SAL_KA3142AA_AS	PRJNA186035	SRP018785	SAMN04362467	SRS1277605	2016-02-06	2015-01-01	Environment	Plant	cucumbers	2015	8			North America	United States	Maryland						Javiana (Predicted)					FDA Center for Food Safety and Applied Nutrition		Javiana	D1	l,z28	1,5	Javiana	9	l,z28	1,5	24	17	Javiana	Lineage 3		13	12	17	16	13
SAL_EA9815AA	CFSAN038609	SAL_EA9815AA	SAL_KA3558AA_AS	PRJNA186035	SRP018785	SAMN04461123	SRS1279629	2016-02-09	2015-01-01	Environment	Plant	cucumbers	2015	8			North America	United States	Maryland						Javiana (Predicted)					FDA Center for Food Safety and Applied Nutrition		Javiana	D1	l,z28	1,5	Javiana	9	l,z28	1,5	24	17	Javiana	Lineage 3		13	12	17	16	13
SAL_EA9816AA	CFSAN038608	SAL_EA9816AA	SAL_KA3559AA_AS	PRJNA186035	SRP018785	SAMN04461122	SRS1279631	2016-02-09	2015-01-01	Environment	Plant	cucumbers	2015	8			North America	United States	Maryland						Javiana (Predicted)					FDA Center for Food Safety and Applied Nutrition		Javiana	D1	l,z28	1,5	Javiana	9	l,z28	1,5	24	17	Javiana	Lineage 3		13	12	17	16	13
SAL_EA9817AA	CFSAN038607	SAL_EA9817AA	SAL_KA3560AA_AS	PRJNA186035	SRP018785	SAMN04461121	SRS1279632	2016-02-09	2015-01-01	Environment	Plant	cucumbers	2015	8			North America	United States	Maryland						Javiana (Predicted)					FDA Center for Food Safety and Applied Nutrition		Javiana	D1	l,z28	1,5	Javiana	9	l,z28	1,5	24	17	Javiana	Lineage 3		13	12	17	16	13
SAL_EA9818AA	CFSAN038606	SAL_EA9818AA	SAL_KA3561AA_AS	PRJNA186035	SRP018785	SAMN04461120	SRS1279625	2016-02-09	2015-01-01	Environment	Plant	cucumbers	2015	8			North America	United States	Maryland						Javiana (Predicted)					FDA Center for Food Safety and Applied Nutrition		Javiana	D1	l,z28	1,5	Javiana	9	l,z28	1,5	24	17	Javiana	Lineage 3		13	12	17	16	13
SAL_EA9819AA	CFSAN038605	SAL_EA9819AA	SAL_KA3562AA_AS	PRJNA186035	SRP018785	SAMN04461119	SRS1279624	2016-02-09	2015-01-01	Environment	Plant	cucumbers	2015	8			North America	United States	Maryland						Javiana (Predicted)					FDA Center for Food Safety and Applied Nutrition		Javiana	D1	l,z28	1,5	Javiana	9	l,z28	1,5	24	17	Javiana	Lineage 3		13	12	17	16	13
SAL_EA9820AA	CFSAN038603	SAL_EA9820AA	SAL_KA3563AA_AS	PRJNA186035	SRP018785	SAMN04461117	SRS1279623	2016-02-09	2015-01-01	Environment	Plant	cucumbers	2015	8			North America	United States	Maryland						Javiana (Predicted)					FDA Center for Food Safety and Applied Nutrition		Javiana	D1	l,z28	1,5	Javiana	9	l,z28	1,5	24	17	Javiana	Lineage 3		13	12	17	16	13
SAL_EA9821AA	CFSAN038600	SAL_EA9821AA	SAL_KA3564AA_AS	PRJNA186035	SRP018785	SAMN04461114	SRS1279626	2016-02-09	2015-01-01	Environment	Plant	cucumbers	2015	8			North America	United States	Maryland						Javiana (Predicted)					FDA Center for Food Safety and Applied Nutrition		Javiana	D1	l,z28	1,5	Javiana	9	l,z28	1,5	24	17	Javiana	Lineage 3		13	12	17	16	13
SAL_EA9822AA	CFSAN038599	SAL_EA9822AA	SAL_KA3565AA_AS	PRJNA186035	SRP018785	SAMN04461113	SRS1279627	2016-02-09	2015-01-01	Environment	Plant	cucumbers	2015	8			North America	United States	Maryland						Javiana (Predicted)					FDA Center for Food Safety and Applied Nutrition		Javiana	D1	l,z28	1,5	Javiana	9	l,z28	1,5	24	17	Javiana	Lineage 3		13	12	17	16	13
SAL_EA9823AA	CFSAN038598	SAL_EA9823AA	SAL_KA3566AA_AS	PRJNA186035	SRP018785	SAMN04096913	SRS1279620	2016-02-09	2015-01-01	Environment	Plant	cucumbers	2015	8			North America	United States	Maryland						Javiana (Predicted)					FDA		Javiana	D1	l,z28	1,5	Javiana	9	l,z28	1,5	24	17	Javiana	Lineage 3		13	12	17	16	13
SAL_EA9824AA	CFSAN038597	SAL_EA9824AA	SAL_KA3567AA_AS	PRJNA186035	SRP018785	SAMN04461112	SRS1279621	2016-02-09	2015-01-01	Environment	Plant	cucumbers	2015	8			North America	United States	Maryland						Javiana (Predicted)					FDA Center for Food Safety and Applied Nutrition		Javiana	D1	l,z28	1,5	Javiana	9	l,z28	1,5	24	17	Javiana	Lineage 3		13	12	17	16	13
SAL_EA9825AA	CFSAN038596	SAL_EA9825AA	SAL_KA3568AA_AS	PRJNA186035	SRP018785	SAMN04461111	SRS1279622	2016-02-09	2015-01-01	Environment	Plant	cucumbers	2015	8			North America	United States	Maryland						Javiana (Predicted)					FDA Center for Food Safety and Applied Nutrition		Javiana	D1	l,z28	1,5	Javiana	9	l,z28	1,5	24	17	Javiana	Lineage 3		13	12	17	16	13
SAL_EA9826AA	CFSAN038595	SAL_EA9826AA	SAL_KA3569AA_AS	PRJNA186035	SRP018785	SAMN04096936	SRS1279616	2016-02-09	2015-01-01	Environment	Plant	cucumbers	2015	8			North America	United States	Maryland						Javiana (Predicted)					FDA		Javiana	D1	l,z28	1,5	Javiana	9	l,z28	1,5	24	17	Javiana	Lineage 3		13	12	17	16	13
SAL_EA9827AA	CFSAN038592	SAL_EA9827AA	SAL_KA3570AA_AS	PRJNA186035	SRP018785	SAMN04461076	SRS1279618	2016-02-09	2015-01-01	Environment	Plant	cucumbers	2015	8			North America	United States	Maryland						Javiana (Predicted)					FDA Center for Food Safety and Applied Nutrition		Javiana	D1	l,z28	1,5	Javiana	9	l,z28	1,5	24	17	Javiana	Lineage 3		13	12	17	16	13
SAL_EA9828AA	CFSAN038590	SAL_EA9828AA	SAL_KA3571AA_AS	PRJNA186035	SRP018785	SAMN04461075	SRS1279617	2016-02-09	2015-01-01	Environment	Plant	cucumbers	2015	8			North America	United States	Maryland						Javiana (Predicted)					FDA Center for Food Safety and Applied Nutrition		Javiana	D1	l,z28	1,5	Javiana	9	l,z28	1,5	24	17	Javiana	Lineage 3		13	12	17	16	13
SAL_EA9829AA	CFSAN038589	SAL_EA9829AA	SAL_KA3572AA_AS	PRJNA186035	SRP018785	SAMN04461052	SRS1279619	2016-02-09	2015-01-01	Environment	Plant	cucumbers	2015	8			North America	United States	Maryland						Javiana (Predicted)					FDA Center for Food Safety and Applied Nutrition		Javiana	D1	l,z28	1,5	Javiana	9	l,z28	1,5	24	17	Javiana	Lineage 3		13	12	17	16	13
SAL_EA9830AA	CFSAN038588	SAL_EA9830AA	SAL_KA3573AA_AS	PRJNA186035	SRP018785	SAMN04461051	SRS1279591	2016-02-09	2015-01-01	Environment	Plant	cucumbers	2015	8			North America	United States	Maryland						Javiana (Predicted)					FDA Center for Food Safety and Applied Nutrition		Javiana	D1	l,z28	1,5	Javiana	9	l,z28	1,5	24	17	Javiana	Lineage 3		13	12	17	16	13
SAL_EA9831AA	CFSAN038587	SAL_EA9831AA	SAL_KA3574AA_AS	PRJNA186035	SRP018785	SAMN04461050	SRS1279590	2016-02-09	2015-01-01	Environment	Plant	cucumbers	2015	8			North America	United States	Maryland						Javiana (Predicted)					FDA Center for Food Safety and Applied Nutrition		Javiana	D1	l,z28	1,5	Javiana	9	l,z28	1,5	24	17	Javiana	Lineage 3		13	12	17	16	13
SAL_EA9832AA	CFSAN038586	SAL_EA9832AA	SAL_KA3575AA_AS	PRJNA186035	SRP018785	SAMN04461049	SRS1279613	2016-02-09	2015-01-01	Environment	Plant	cucumbers	2015	8			North America	United States	Maryland						Javiana (Predicted)					FDA Center for Food Safety and Applied Nutrition		Javiana	D1	l,z28	1,5	Javiana	9	l,z28	1,5	24	17	Javiana	Lineage 3		13	12	17	16	13
SAL_EA9833AA	CFSAN038620	SAL_EA9833AA	SAL_KA3576AA_AS	PRJNA186035	SRP018785	SAMN04461131	SRS1279612	2016-02-09	2015-01-01	Environment	Plant	cucumbers	2015	8			North America	United States	Maryland						Javiana (Predicted)					FDA Center for Food Safety and Applied Nutrition		Javiana	D1	l,z28	1,5	Javiana	9	l,z28	1,5	24	17	Javiana	Lineage 3		13	12	17	16	13
SAL_EA9834AA	CFSAN038633	SAL_EA9834AA	SAL_KA3577AA_AS	PRJNA186035	SRP018785	SAMN04461144	SRS1279614	2016-02-09	2015-01-01	Environment	Plant	cucumbers	2015	8			North America	United States	Maryland						Javiana (Predicted)					FDA Center for Food Safety and Applied Nutrition		Javiana	D1	l,z28	1,5	Javiana	9	l,z28	1,5	24	17	Javiana	Lineage 3		13	12	17	16	13
SAL_EA9835AA	CFSAN038632	SAL_EA9835AA	SAL_KA3578AA_AS	PRJNA186035	SRP018785	SAMN04461143	SRS1279615	2016-02-09	2015-01-01	Environment	Plant	cucumbers	2015	8			North America	United States	Maryland						Javiana (Predicted)					FDA Center for Food Safety and Applied Nutrition		Javiana	D1	l,z28	1,5	Javiana	9	l,z28	1,5	24	17	Javiana	Lineage 3		13	12	17	16	13
SAL_EA9836AA	CFSAN038631	SAL_EA9836AA	SAL_KA3579AA_AS	PRJNA186035	SRP018785	SAMN04461142	SRS1279585	2016-02-09	2015-01-01	Environment	Plant	cucumbers	2015	8			North America	United States	Maryland						Javiana (Predicted)					FDA Center for Food Safety and Applied Nutrition		Javiana	D1	l,z28	1,5	Javiana	9	l,z28	1,5	24	17	Javiana	Lineage 3		13	12	17	16	13
SAL_EA9837AA	CFSAN038630	SAL_EA9837AA	SAL_KA3580AA_AS	PRJNA186035	SRP018785	SAMN04461141	SRS1279586	2016-02-09	2015-01-01	Environment	Plant	cucumbers	2015	8			North America	United States	Maryland						Javiana (Predicted)					FDA Center for Food Safety and Applied Nutrition		Javiana	D1	l,z28	1,5	Javiana	9	l,z28	1,5	24	17	Javiana	Lineage 3		13	12	17	16	13
SAL_EA9838AA	CFSAN038629	SAL_EA9838AA	SAL_KA3581AA_AS	PRJNA186035	SRP018785	SAMN04461140	SRS1279587	2016-02-09	2015-01-01	Environment	Plant	cucumbers	2015	8			North America	United States	Maryland						Javiana (Predicted)					FDA Center for Food Safety and Applied Nutrition		Javiana	D1	l,z28	1,5	Javiana	9	l,z28	1,5	24	17	Javiana	Lineage 3		13	12	17	16	13
SAL_EA9839AA	CFSAN038628	SAL_EA9839AA	SAL_KA3582AA_AS	PRJNA186035	SRP018785	SAMN04461139	SRS1279588	2016-02-09	2015-01-01	Environment	Plant	cucumbers	2015	8			North America	United States	Maryland						Javiana (Predicted)					FDA Center for Food Safety and Applied Nutrition		Javiana	D1	l,z28	1,5	Javiana	9	l,z28	1,5	24	17	Javiana	Lineage 3		13	12	17	16	13
SAL_EA9840AA	CFSAN038627	SAL_EA9840AA	SAL_KA3583AA_AS	PRJNA186035	SRP018785	SAMN04461138	SRS1279589	2016-02-09	2015-01-01	Environment	Plant	cucumbers	2015	8			North America	United States	Maryland						Javiana (Predicted)					FDA Center for Food Safety and Applied Nutrition		Javiana	D1	l,z28	1,5	Javiana	9	l,z28	1,5	24	17	Javiana	Lineage 3		13	12	17	16	13
SAL_EA9841AA	CFSAN038626	SAL_EA9841AA	SAL_KA3584AA_AS	PRJNA186035	SRP018785	SAMN04461137	SRS1279581	2016-02-09	2015-01-01	Environment	Plant	cucumbers	2015	8			North America	United States	Maryland						Javiana (Predicted)					FDA Center for Food Safety and Applied Nutrition		Javiana	D1	l,z28	1,5	Javiana	9	l,z28	1,5	24	17	Javiana	Lineage 3		13	12	17	16	13
SAL_EA9842AA	CFSAN038625	SAL_EA9842AA	SAL_KA3585AA_AS	PRJNA186035	SRP018785	SAMN04461136	SRS1279582	2016-02-09	2015-01-01	Environment	Plant	cucumbers	2015	8			North America	United States	Maryland						Javiana (Predicted)					FDA Center for Food Safety and Applied Nutrition		Javiana	D1	l,z28	1,5	Javiana	9	l,z28	1,5	24	17	Javiana	Lineage 3		13	12	17	16	13
SAL_EA9843AA	CFSAN038624	SAL_EA9843AA	SAL_KA3586AA_AS	PRJNA186035	SRP018785	SAMN04461135	SRS1279583	2016-02-09	2015-01-01	Environment	Plant	cucumbers	2015	8			North America	United States	Maryland						Javiana (Predicted)					FDA Center for Food Safety and Applied Nutrition		Javiana	D1	l,z28	1,5	Javiana	9	l,z28	1,5	24	17	Javiana	Lineage 3		13	12	17	16	13
SAL_EA9844AA	CFSAN038623	SAL_EA9844AA	SAL_KA3587AA_AS	PRJNA186035	SRP018785	SAMN04461134	SRS1279577	2016-02-09	2015-01-01	Environment	Plant	cucumbers	2015	8			North America	United States	Maryland						Javiana (Predicted)					FDA Center for Food Safety and Applied Nutrition		Javiana	D1	l,z28	1,5	Javiana	9	l,z28	1,5	24	17	Javiana	Lineage 3		13	12	17	16	13
SAL_EA9845AA	CFSAN038622	SAL_EA9845AA	SAL_KA3588AA_AS	PRJNA186035	SRP018785	SAMN04461133	SRS1279576	2016-02-09	2015-01-01	Environment	Plant	cucumbers	2015	8			North America	United States	Maryland						Javiana (Predicted)					FDA Center for Food Safety and Applied Nutrition		Javiana	D1	l,z28	1,5	Javiana	9	l,z28	1,5	24	17	Javiana	Lineage 3		13	12	17	16	13
SAL_EA9846AA	CFSAN038621	SAL_EA9846AA	SAL_KA3589AA_AS	PRJNA186035	SRP018785	SAMN04461132	SRS1279579	2016-02-09	2015-01-01	Environment	Plant	cucumbers	2015	8			North America	United States	Maryland						Javiana (Predicted)					FDA Center for Food Safety and Applied Nutrition		Javiana	D1	l,z28	1,5	Javiana	9	l,z28	1,5	24	17	Javiana	Lineage 3		13	12	17	16	13
SAL_EA9847AA	CFSAN038619	SAL_EA9847AA	SAL_KA3590AA_AS	PRJNA186035	SRP018785	SAMN04461130	SRS1279574	2016-02-09	2015-01-01	Environment	Plant	cucumbers	2015	8			North America	United States	Maryland						Javiana (Predicted)					FDA Center for Food Safety and Applied Nutrition		Javiana	D1	l,z28	1,5	Javiana	9	l,z28	1,5	24	17	Javiana	Lineage 3		13	12	17	16	13
SAL_EA9848AA	CFSAN038618	SAL_EA9848AA	SAL_KA3591AA_AS	PRJNA186035	SRP018785	SAMN04096903	SRS1279573	2016-02-09	2015-01-01	Environment	Plant	cucumbers	2015	8			North America	United States	Maryland						Javiana (Predicted)					FDA		Javiana	D1	l,z28	1,5	Javiana	9	l,z28	1,5	24	17	Javiana	Lineage 3		13	12	17	16	13
SAL_EA9849AA	CFSAN038617	SAL_EA9849AA	SAL_KA3592AA_AS	PRJNA186035	SRP018785	SAMN04461129	SRS1279575	2016-02-09	2015-01-01	Environment	Plant	cucumbers	2015	8			North America	United States	Maryland						Javiana (Predicted)					FDA Center for Food Safety and Applied Nutrition		Javiana	D1	l,z28	1,5	Javiana	9	l,z28	1,5	24	17	Javiana	Lineage 3		13	12	17	16	13
SAL_EA9850AA	CFSAN038616	SAL_EA9850AA	SAL_KA3593AA_AS	PRJNA186035	SRP018785	SAMN04461128	SRS1279571	2016-02-09	2015-01-01	Environment	Plant	cucumbers	2015	8			North America	United States	Maryland						Javiana (Predicted)					FDA Center for Food Safety and Applied Nutrition		Javiana	D1	l,z28	1,5	Javiana	9	l,z28	1,5	24	17	Javiana	Lineage 3		13	12	17	16	13
SAL_EA9851AA	CFSAN038615	SAL_EA9851AA	SAL_KA3594AA_AS	PRJNA186035	SRP018785	SAMN04096917	SRS1279572	2016-02-09	2015-01-01	Environment	Plant	cucumbers	2015	8			North America	United States	Maryland						Javiana (Predicted)					FDA		Javiana	D1	l,z28	1,5	Javiana	9	l,z28	1,5	24	17	Javiana	Lineage 3		13	12	17	16	13
SAL_EA9852AA	CFSAN038614	SAL_EA9852AA	SAL_KA3595AA_AS	PRJNA186035	SRP018785	SAMN04461127	SRS1279568	2016-02-09	2015-01-01	Environment	Plant	cucumbers	2015	8			North America	United States	Maryland						Javiana (Predicted)					FDA Center for Food Safety and Applied Nutrition		Javiana	D1	l,z28	1,5	Javiana	9	l,z28	1,5	24	17	Javiana	Lineage 3		13	12	17	16	13
SAL_EA9853AA	CFSAN038613	SAL_EA9853AA	SAL_KA3596AA_AS	PRJNA186035	SRP018785	SAMN04461126	SRS1279569	2016-02-09	2015-01-01	Environment	Plant	cucumbers	2015	8			North America	United States	Maryland						Javiana (Predicted)					FDA Center for Food Safety and Applied Nutrition		Javiana	D1	l,z28	1,5	Javiana	9	l,z28	1,5	24	17	Javiana	Lineage 3		13	12	17	16	13
SAL_EA9854AA	CFSAN038612	SAL_EA9854AA	SAL_KA3597AA_AS	PRJNA186035	SRP018785	SAMN04461125	SRS1279565	2016-02-09	2015-01-01	Environment	Plant	cucumbers	2015	8			North America	United States	Maryland						Javiana (Predicted)					FDA Center for Food Safety and Applied Nutrition		Javiana	D1	l,z28	1,5	Javiana	9	l,z28	1,5	24	17	Javiana	Lineage 3		13	12	17	16	13
SAL_EA9855AA	CFSAN038611	SAL_EA9855AA	SAL_KA3598AA_AS	PRJNA186035	SRP018785	SAMN04461124	SRS1279566	2016-02-09	2015-01-01	Environment	Plant	cucumbers	2015	8			North America	United States	Maryland						Javiana (Predicted)					FDA Center for Food Safety and Applied Nutrition		Javiana	D1	l,z28	1,5	Javiana	9	l,z28	1,5	24	17	Javiana	Lineage 3		13	12	17	16	13
SAL_EA9856AA	CFSAN038585	SAL_EA9856AA	SAL_KA3599AA_AS	PRJNA186035	SRP018785	SAMN04461048	SRS1279557	2016-02-09	2015-01-01	Environment	Plant	cucumbers	2015	8			North America	United States	Maryland						Javiana (Predicted)					FDA Center for Food Safety and Applied Nutrition		Javiana	D1	l,z28	1,5	Javiana	9	l,z28	1,5	24	17	Javiana	Lineage 3		13	12	17	16	13
SAL_EA9857AA	CFSAN038584	SAL_EA9857AA	SAL_KA3600AA_AS	PRJNA186035	SRP018785	SAMN04461047	SRS1279558	2016-02-09	2015-01-01	Environment	Plant	cucumbers	2015	8			North America	United States	Maryland						Javiana (Predicted)					FDA Center for Food Safety and Applied Nutrition		Javiana	D1	l,z28	1,5	Javiana	9	l,z28	1,5	24	17	Javiana	Lineage 3		13	12	17	16	13
SAL_EA9858AA	CFSAN038583	SAL_EA9858AA	SAL_KA3601AA_AS	PRJNA186035	SRP018785	SAMN04458023	SRS1279552	2016-02-09	2015-01-01	Environment	Plant	cucumbers	2015	8			North America	United States	Maryland						Javiana (Predicted)					FDA Center for Food Safety and Applied Nutrition		Javiana	D1	l,z28	1,5	Javiana	9	l,z28	1,5	24	17	Javiana	Lineage 3		13	12	17	16	13
SAL_EA9859AA	CFSAN038582	SAL_EA9859AA	SAL_KA3602AA_AS	PRJNA186035	SRP018785	SAMN04458020	SRS1279553	2016-02-09	2015-01-01	Environment	Plant	cucumbers	2015	8			North America	United States	Maryland						Javiana (Predicted)					FDA Center for Food Safety and Applied Nutrition		Javiana	D1	l,z28	1,5	Javiana	9	l,z28	1,5	24	17	Javiana	Lineage 3		13	12	17	16	13
SAL_EA9860AA	CFSAN038581	SAL_EA9860AA	SAL_KA3603AA_AS	PRJNA186035	SRP018785	SAMN04458019	SRS1279531	2016-02-09	2015-01-01	Environment	Plant	cucumbers	2015	8			North America	United States	Maryland						Javiana (Predicted)					FDA Center for Food Safety and Applied Nutrition		Javiana	D1	l,z28	1,5		9,46	l,z28	1,5	24	17	Javiana	Lineage 3		13	12	17	16	13
SAL_EA9861AA	CFSAN038580	SAL_EA9861AA	SAL_KA3604AA_AS	PRJNA186035	SRP018785	SAMN04458018	SRS1279509	2016-02-09	2015-01-01	Environment	Plant	cucumbers	2015	8			North America	United States	Maryland						Javiana (Predicted)					FDA Center for Food Safety and Applied Nutrition		Javiana	D1	l,z28	1,5	Javiana	9	l,z28	1,5	24	17	Javiana	Lineage 3		13	12	17	16	13
SAL_EA9862AA	CFSAN038579	SAL_EA9862AA	SAL_KA3605AA_AS	PRJNA186035	SRP018785	SAMN04458016	SRS1279496	2016-02-09	2015-01-01	Environment	Plant	cucumbers	2015	8			North America	United States	Maryland						Javiana (Predicted)					FDA Center for Food Safety and Applied Nutrition		Javiana	D1	l,z28	1,5	Javiana	9	l,z28	1,5	24	17	Javiana	Lineage 3		13	12	17	16	13
SAL_EA9872AA	CFSAN038638	SAL_EA9872AA	SAL_KA3615AA_AS	PRJNA186035	SRP018785	SAMN04096921	SRS1279442	2016-02-09	2015-01-01	Environment	Plant	cucumbers	2015	8			North America	United States	Delaware						Javiana (Predicted)					FDA		Javiana	D1	l,z28	1,5	Javiana	9	l,z28	1,5	24	17	Javiana	Lineage 3		13	12	17	16	13
SAL_EA9873AA	CFSAN038635	SAL_EA9873AA	SAL_KA3616AA_AS	PRJNA186035	SRP018785	SAMN04096898	SRS1279438	2016-02-09	2015-01-01	Environment	Plant	cucumbers	2015	8			North America	United States	Maryland						Javiana (Predicted)					FDA		Javiana	D1	l,z28	1,5	Javiana	9	l,z28	1,5	24	17	Javiana	Lineage 3		13	12	17	16	13
SAL_EA9916AA	2015K-1320	SAL_EA9916AA	SAL_KA3660AA_AS	PRJNA230403	SRP040281	SAMN04482124	SRS1282411	2016-02-10	2016-02-09								North America	United States							Javiana (Predicted)					Centers for Disease Control and Prevention Enteric Diseases Laboratory Branch		Javiana	D1	l,z28	1,5	Javiana	9	l,z28	1,5	24	17	Javiana	Lineage 3		13	12	17	16	13
SAL_FA0412AA	CFSAN038594	SAL_FA0412AA	SAL_KA4152AA_AS	PRJNA186035	SRP018785	SAMN04480336	SRS1296486	2016-02-16	2015-01-01	Environment	Plant	cucumbers	2015	8			North America	United States	Maryland						Javiana (Predicted)					FDA Center for Food Safety and Applied Nutrition		Javiana	D1	l,z28	1,5	Javiana	9	l,z28	1,5	24	17	Javiana	Lineage 3		13	12	17	16	13
SAL_FA0462AA	CFSAN000905	SAL_FA0462AA	SAL_KA4205AA_AS	PRJNA192057	SRP070438	SAMN01938999	SRS1299380	2016-02-18	2015-01-01	Environment	Water/River	canal water	2009	9			North America	Mexico							Javiana	I				Food and Drug Administration - Center for Food Safety and Applied Nutrition (US)		Javiana	D1	l,z28	1,5	Javiana	9	l,z28	1,5	24	17	Javiana	Lineage 3		13	12	17	16	13
SAL_FA0636AA	FDA767298 B-2	SAL_FA0636AA	SAL_KA4384AA_AS	PRJNA186035	SRP018785	SAMN02847502	SRS1296908	2016-02-21	2015-01-01	Environment	Plant	papaya	2012				North America	Mexico							Javiana	I				Food and Drug Administration - Center for Food Safety and Applied Nutrition (US)		Javiana	D1	l,z28	1,5	Javiana	9	l,z28	1,5	1674	17	Javiana	Lineage 3		13	12	17	520	13
SAL_FA0638AA	FDA767296 B-2	SAL_FA0638AA	SAL_KA4386AA_AS	PRJNA186035	SRP018785	SAMN02847500	SRS1296910	2016-02-21	2015-01-01	Environment	Plant	papaya	2012				North America	Mexico							Javiana	I				Food and Drug Administration - Center for Food Safety and Applied Nutrition (US)		Javiana	D1	l,z28	1,5	Javiana	9	l,z28	1,5	1674	17	Javiana	Lineage 3		13	12	17	520	13
SAL_FA0659AA	CFSAN038591	SAL_FA0659AA	SAL_KA4406AA_AS	PRJNA186035	SRP018785	SAMN04480334	SRS1296316	2016-02-21	2015-01-01	Environment	Plant	cucumbers	2015	8			North America	United States	Maryland						Javiana (Predicted)					FDA Center for Food Safety and Applied Nutrition		Javiana	D1	l,z28	1,5	Javiana	9	l,z28	1,5	24	17	Javiana	Lineage 3		13	12	17	16	13
SAL_FA0660AA	CFSAN038593	SAL_FA0660AA	SAL_KA4407AA_AS	PRJNA186035	SRP018785	SAMN04480335	SRS1296304	2016-02-21	2015-01-01	Environment	Plant	cucumbers	2015	8			North America	United States	Maryland						Javiana (Predicted)					FDA Center for Food Safety and Applied Nutrition		Javiana	D1	l,z28	1,5	Javiana	9	l,z28	1,5	24	17	Javiana	Lineage 3		13	12	17	16	13
SAL_FA1586AA	OSF045752	SAL_FA1586AA	SAL_KA5543AA_AS	PRJNA186035	SRP018785	SAMN04451252	SRS1327877	2016-03-08	2015-01-01	Environment	Water/River	water	2015	6			North America	United States	Washington						Javiana (Predicted)					Food and Drug Administration - Center for Food Safety and Applied Nutrition (US)		Javiana	D1	l,z28	1,5	Javiana	9	l,z28	1,5	24	17	Javiana	Lineage 3		13	12	17	16	13
SAL_FA1870AA	FDA45521-2	SAL_FA1870AA	SAL_KA5957AA_AS	PRJNA186035	SRP018785	SAMN02846061	SRS1340603	2016-03-16	2015-01-01	Food	Plant	orange juice	1999	7			North America	United States	Arizona						Javiana	I				Food and Drug Administration - Center for Food Safety and Applied Nutrition (US)		Javiana	D1	l,z28	1,5	Javiana	9	l,z28	1,5	1674	17	Javiana	Lineage 3		13	12	17	520	13
SAL_FA1871AA	FDA45521-1	SAL_FA1871AA	SAL_KA5956AA_AS	PRJNA186035	SRP018785	SAMN02846060	SRS1340604	2016-03-16	2015-01-01	Food	Plant	orange juice	1999	7			North America	United States	Arizona						Javiana	I				Food and Drug Administration - Center for Food Safety and Applied Nutrition (US)		Javiana	D1	l,z28	1,5	Javiana	9	l,z28	1,5	1674	17	Javiana	Lineage 3		13	12	17	520	13
SAL_FA1925AA	FDA397766-8	SAL_FA1925AA	SAL_KA5962AA_AS	PRJNA186035	SRP018785	SAMN02845847	SRS1341241	2016-03-16	2015-01-01	Environment	Plant	cantaloupe	2006	11			North America	Mexico							Javiana	I				Food and Drug Administration - Center for Food Safety and Applied Nutrition (US)		Javiana	D1	l,z28	1,5	Javiana	9	l,z28	1,5	2816	17	Javiana	Lineage 3		587	12	17	16	13
SAL_FA1938AA	PNUSAS001671	SAL_FA1938AA	SAL_LA0434AA_AS	PRJNA230403	SRP040281	SAMN04521111	SRS1343013	2016-03-16	2016-03-16	Human	Human	Age: 60-69; stool	2016	1			North America	United States							Javiana (Predicted)					PulseNet Next Generation Subtyping Methods Unit		Javiana	D1	l,z28	1,5	Javiana	9	l,z28	1,5	24	17	Javiana	Lineage 3		13	12	17	16	13
SAL_FA2262AA	FDA946760	SAL_FA2262AA	SAL_KA6289AA_AS	PRJNA186035	SRP018785	SAMN04543856	SRS1349551	2016-03-19	2015-01-01	Aquatic Animal	Fish	Frozen Mackerel	2016	3			Oceania	Fiji							Javiana (Predicted)					FDA Center for Food Safety and Applied Nutrition		Javiana	D1	l,z28	1,5	Javiana	9	l,z28	1,5	1674	17	Javiana	Lineage 3		13	12	17	520	13
SAL_FA2413AA	PNUSAS001754	SAL_FA2413AA	SAL_KA6507AA_AS	PRJNA230403	SRP040281	SAMN04558122	SRS1353927	2016-03-22	2016-03-22	Human	Human	Age: 10-19; stool	2016	2			North America	United States							Javiana (Predicted)					Center for Diease Control and Prevention - Enteric Diseases Laboratory Branch (US)		Javiana	D1	l,z28	1,5	Javiana	9	l,z28	1,5	1674	17	Javiana	Lineage 3		13	12	17	520	13
SAL_FA4564AA	187480	SAL_FA4564AA	SAL_KA8172AA_AS	PRJNA248792	SRP042645	SAMN04600341	SRS1371364	2016-04-02	2016-04-02	Human	Human	Homo sapiens; human	2015	11			Europe	United Kingdom							Javiana	I				Public Health England		Javiana	D1	l,z28	1,5	Javiana	9	l,z28	1,5	437	17	Javiana	Lineage 3		13	12	63	16	13
SAL_FA4867AA	FDA674145-2 RVHE1	SAL_FA4867AA	SAL_KA8965AA_AS	PRJNA186035	SRP018785	SAMN02847230	SRS1378785	2016-04-07	2015-01-01	Food	Plant	organic chile powder	2011	3			North America	United States	Nevada						9,12:L,Z28:-	I				Food and Drug Administration - Center for Food Safety and Applied Nutrition (US)		Javiana	D1	l,z28	l,z13,z28		9	l,z28	-	24	17	Javiana	Lineage 3		13	12	17	16	13
SAL_FA5123AA	VA-WGS-16028	SAL_FA5123AA	SAL_KA9320AA_AS	PRJNA219491	SRP033708	SAMN04605563	SRS1398851	2016-04-16	2015-01-01	Environment	Water/River	water	2015				North America	United States	Virginia						Javiana (Predicted)					Food and Drug Administration - Center for Food Safety and Applied Nutrition (US)		Javiana	D1	l,z28	1,5	Javiana	9	l,z28	1,5	24	17	Javiana	Lineage 3		13	12	17	16	13
SAL_FA5129AA	VA-WGS-16033	SAL_FA5129AA	SAL_KA9314AA_AS	PRJNA219491	SRP033708	SAMN04605568	SRS1398850	2016-04-16	2015-01-01	Environment	Water/River	water	2015				North America	United States	Virginia						Javiana (Predicted)					Food and Drug Administration - Center for Food Safety and Applied Nutrition (US)		Javiana	D1	l,z28	1,5	Javiana	9	l,z28	1,5	24	17	Javiana	Lineage 3		13	12	17	16	13
SAL_FA5132AA	VA-WGS-16030	SAL_FA5132AA	SAL_KA9311AA_AS	PRJNA219491	SRP033708	SAMN04605565	SRS1398839	2016-04-16	2015-01-01	Environment	Water/River	water	2015				North America	United States	Virginia						Javiana (Predicted)					Food and Drug Administration - Center for Food Safety and Applied Nutrition (US)		Javiana	-	l,z28	1,5		-	l,z28	1,5	24	17	Javiana	Lineage 3		13	12	17	16	13
SAL_FA5135AA	VA-WGS-16038	SAL_FA5135AA	SAL_KA9308AA_AS	PRJNA219491	SRP033708	SAMN04605573	SRS1398835	2016-04-16	2015-01-01	Environment	Water/River	water	2015				North America	United States	Virginia						Javiana (Predicted)					Food and Drug Administration - Center for Food Safety and Applied Nutrition (US)		Javiana	D1	l,z28	1,5	Javiana	9	l,z28	1,5	24	17	Javiana	Lineage 3		13	12	17	16	13
SAL_FA5159AA	FDA736757	SAL_FA5159AA	SAL_KA9281AA_AS	PRJNA186035	SRP018785	SAMN04480761	SRS1397512	2016-04-16	2015-01-01	Food	ND/Others	food	2011	10			North America	Canada							Javiana (Predicted)					Food and Drug Administration - Center for Food Safety and Applied Nutrition (US)		Panama	D1	l,z28	1,5	Javiana	9	l,z28	1,5	2494	17	Javiana	Lineage 3		60	429	17	662	13
SAL_FA5495AA	VA-WGS-16043	SAL_FA5495AA	SAL_KA9573AA_AS	PRJNA219491	SRP033708	SAMN04605614	SRS1401221	2016-04-20	2015-01-01	Environment	Water/River	water	2015				North America	United States	Virginia						Javiana (Predicted)					FDA Center for Food Safety and Applied Nutrition		Javiana	D1	l,z28	1,5	Javiana	9	l,z28	1,5	24	17	Javiana	Lineage 3		13	12	17	16	13
SAL_FA5545AA	PNUSAS001945	SAL_FA5545AA	SAL_KA9696AA_AS	PRJNA230403	SRP040281	SAMN04849635	SRS1404934	2016-04-21	2016-04-20	Human	Human	Age: 20-29; stool	2016	3			North America	United States							Javiana					Centers for Disease Control and Prevention - PulseNet		Javiana	D1	l,z28	1,5	Javiana	9	l,z28	1,5	24	17	Javiana	Lineage 3		13	12	17	16	13
SAL_FA6002AA	CFSAN045323	SAL_FA6002AA	SAL_LA0076AA_AS	PRJNA293224	SRP070120	SAMN04431459	SRS1416352	2016-04-29	2015-01-01	Livestock	Swine	pork	2013	9			Asia	Thailand							Seremban					Food and Drug Administration - Center for Food Safety and Applied Nutrition (US)		Javiana	D1	l,z28	1,5	Javiana	9	l,z28	1,5	1547	17	Javiana	Lineage 3		60	12	17	16	13
SAL_FA6003AA	CFSAN045322	SAL_FA6003AA	SAL_LA0075AA_AS	PRJNA293224	SRP070120	SAMN04431458	SRS1416351	2016-04-29	2015-01-01	Livestock	Swine	pork	2013	9			Asia	Thailand							Panama					Food and Drug Administration - Center for Food Safety and Applied Nutrition (US)		Javiana	D1	l,z28	1,5	Javiana	9	l,z28	1,5	1547	17	Javiana	Lineage 3		60	12	17	16	13
SAL_FA6288AA	2016K-0242	SAL_FA6288AA	SAL_LA0695AA_AS	PRJNA230403	SRP040281	SAMN04964659	SRS1429239	2016-05-10	2016-05-09	Environment	Plant	Chia seeds	2016	3			North America	United States							Javiana (Predicted)					Center for Diease Control and Prevention - Enteric Diseases Laboratory Branch (US)		Javiana	D1	l,z28	1,5	Javiana	9	l,z28	1,5	1674	17	Javiana	Lineage 3		13	12	17	520	13
SAL_FA6915AA	FDA474834-1	SAL_FA6915AA	SAL_LA4927AA_AS	PRJNA186035	SRP018785	SAMN01938995	SRS1447283	2016-05-20	2015-01-01	Environment	Water/River	Water with sediment	2009	9			North America	Mexico							Javiana (predicted)	I				Food and Drug Administration - Center for Food Safety and Applied Nutrition (US)		Javiana	D1	l,z28	1,5	Javiana	9	l,z28	1,5	24	17	Javiana	Lineage 3		13	12	17	16	13
SAL_FA7137AA	E2016007387	SAL_FA7137AA	SAL_LA1848AA_AS	PRJNA186035	SRP018785	SAMN05058781	SRS1462434	2016-05-23	2015-01-01	Human	Human	Homo sapiens; Feces	2016	5			North America	United States	Minnesota						Enteritidis					Food and Drug Administration - Center for Food Safety and Applied Nutrition (US)		Javiana	D1	l,z28	1,5	Javiana	9	l,z28	1,5	24	17	Javiana	Lineage 3		13	12	17	16	13
SAL_FA7279AA	FDA445534 2-7	SAL_FA7279AA	SAL_LA2395AA_AS	PRJNA186035	SRP018785	SAMN02846015	SRS1466568	2016-05-25	2015-01-01	Food	Dairy	ranchero cheese	2007	11			North America	Mexico							Tyresoe	I				Food and Drug Administration - Center for Food Safety and Applied Nutrition (US)		Javiana	D1	l,z28	1,5	Javiana	9	l,z28	1,5	24	17	Javiana	Lineage 3		13	12	17	16	13
SAL_FA7832AA	FDA474839-1	SAL_FA7832AA	SAL_LA3364AA_AS	PRJNA186035	SRP018785	SAMN01939000	SRS1494256	2016-06-10	2015-01-01	Environment	Water/River	Water with snail shells	2009	9			North America	Mexico							Javiana	I				US Food and Drug Administration		Javiana	D1	l,z28	1,5	Javiana	9	l,z28	1,5	24	17	Javiana	Lineage 3		13	12	17	16	13
SAL_FA8158AA	PNUSAS002239	SAL_FA8158AA	SAL_LA3705AA_AS	PRJNA230403	SRP040281	SAMN05214365	SRS1523153	2016-06-24	2016-06-23	Human	Human	Age: 50-59; stool	2015	11			North America	United States												PulseNet Next Generation Subtyping Methods Unit		Javiana	D1	l,z28	1,5	Javiana	9	l,z28	1,5	371	17	Javiana	Lineage 3		13	12	17	16	117
SAL_FA8387AA	PNUSAS002490	SAL_FA8387AA	SAL_MA2258AA_AS	PRJNA230403	SRP040281	SAMN05272029	SRS1523126	2016-06-30	2016-06-23	Human	Human	Age: 10-19; stool	2016	5			North America	United States							Javiana (Predicted)					PulseNet Next Generation Subtyping Methods Unit		Javiana	D1	l,z28	1,5	Javiana	9	l,z28	1,5	24	17	Javiana	Lineage 3		13	12	17	16	13
SAL_FA8934AA	CVM N42337	SAL_FA8934AA	SAL_MA1641AA_AS	PRJNA292661	SRP063697	SAMN02699342	SRS1502282	2016-06-30	2016-06-21	Poultry	Poultry	ground turkey	2012				North America	United States	Georgia						Javiana	I				FDA		Javiana	D1	l,z28	1,5	Javiana	9	l,z28	1,5	24	17	Javiana	Lineage 3		13	12	17	16	13
SAL_FA9423AA	NMSU-00264	SAL_FA9423AA	SAL_MA0224AA_AS	PRJNA312217	SRP071657	SAMN04488353	SRS1336804	2016-06-30	2015-01-01	Environment	Soil/Dust	environmental swab	2015	10			North America	United States	New Mexico						Javiana (Predicted)					FDA Center for Food Safety and Applied Nutrition		Javiana	D1	l,z28	1,5	Javiana	9	l,z28	1,5	3488	17	Javiana	Lineage 3		13	598	17	16	13
SAL_FA9623AA	PNUSAS001193	SAL_FA9623AA	SAL_LA9704AA_AS	PRJNA230403	SRP040281	SAMN04327370	SRS1246222	2016-06-30	2016-01-12	Human	Human	Homo sapiens; Age: 10-19; stool	2015	10			North America	United States							Javiana					PulseNet Next Generation Subtyping Methods Unit		Javiana	D1	l,z28	1,5	Javiana	9	l,z28	1,5	24	17	Javiana	Lineage 3		13	12	17	16	13
SAL_FA9624AA	PNUSAS001197	SAL_FA9624AA	SAL_LA9703AA_AS	PRJNA230403	SRP040281	SAMN04327374	SRS1246224	2016-06-30	2016-01-12	Human	Human	Homo sapiens; Age: 50-59; stool	2015	10			North America	United States							Javiana					PulseNet Next Generation Subtyping Methods Unit		Javiana	D1	l,z28	1,5	Javiana	9	l,z28	1,5	24	17	Javiana	Lineage 3		13	12	17	16	13
SAL_FA9625AA	PNUSAS001196	SAL_FA9625AA	SAL_LA9702AA_AS	PRJNA230403	SRP040281	SAMN04327373	SRS1246223	2016-06-30	2016-01-12	Human	Human	Homo sapiens; Age: 20-29; stool	2015	9			North America	United States							Javiana					PulseNet Next Generation Subtyping Methods Unit		Javiana	B	l,z28	l,z13,z28	Javiana	9	l,z28	1,5	-242	17	Javiana	Lineage 3		-47	12	17	16	13
SAL_FA9626AA	PNUSAS001192	SAL_FA9626AA	SAL_LA9701AA_AS	PRJNA230403	SRP040281	SAMN04327369	SRS1246225	2016-06-30	2016-01-12	Human	Human	Homo sapiens; Age: 0-4; stool	2015	9			North America	United States							Javiana					PulseNet Next Generation Subtyping Methods Unit		Javiana	D1	l,z28	1,5	Javiana	9	l,z28	1,5	24	17	Javiana	Lineage 3		13	12	17	16	13
SAL_FA9627AA	PNUSAS001195	SAL_FA9627AA	SAL_LA9700AA_AS	PRJNA230403	SRP040281	SAMN04327372	SRS1246226	2016-06-30	2016-01-12	Human	Human	Homo sapiens; Age: 40-49; stool	2015	9			North America	United States							Javiana					PulseNet Next Generation Subtyping Methods Unit		Javiana	D1	l,z28	1,5	Javiana	9	l,z28	1,5	24	17	Javiana	Lineage 3		13	12	17	16	13
SAL_FA9628AA	PNUSAS001194	SAL_FA9628AA	SAL_LA9699AA_AS	PRJNA230403	SRP040281	SAMN04327371	SRS1246228	2016-06-30	2016-01-12	Human	Human	Homo sapiens; Age: 50-59; stool	2015	9			North America	United States							Javiana					PulseNet Next Generation Subtyping Methods Unit		Javiana	D1	l,z28	1,5	Javiana	9	l,z28	1,5	24	17	Javiana	Lineage 3		13	12	17	16	13
SAL_FA9629AA	PNUSAS001191	SAL_FA9629AA	SAL_LA9698AA_AS	PRJNA230403	SRP040281	SAMN04327368	SRS1246227	2016-06-30	2016-01-12	Human	Human	Homo sapiens; Age: 20-29; stool	2015	9			North America	United States							Javiana					PulseNet Next Generation Subtyping Methods Unit		Javiana	D1	l,z28	1,5	Javiana	9	l,z28	1,5	24	17	Javiana	Lineage 3		13	12	17	16	13
SAL_FA9630AA	PNUSAS001190	SAL_FA9630AA	SAL_LA9697AA_AS	PRJNA230403	SRP040281	SAMN04327367	SRS1246229	2016-06-30	2016-01-12	Human	Human	Homo sapiens; Age: 0-4; stool	2015	9			North America	United States							Javiana					PulseNet Next Generation Subtyping Methods Unit		Javiana	D1	l,z28	1,5	Javiana	9	l,z28	1,5	24	17	Javiana	Lineage 3		13	12	17	16	13
SAL_FA9631AA	PNUSAS001189	SAL_FA9631AA	SAL_LA9696AA_AS	PRJNA230403	SRP040281	SAMN04327366	SRS1246230	2016-06-30	2016-01-12	Human	Human	Homo sapiens; Age: 70-79; stool	2015	9			North America	United States							Javiana					PulseNet Next Generation Subtyping Methods Unit		Javiana	D1	l,z28	1,5	Javiana	9	l,z28	1,5	24	17	Javiana	Lineage 3		13	12	17	16	13
SAL_FA9632AA	PNUSAS001188	SAL_FA9632AA	SAL_LA9695AA_AS	PRJNA230403	SRP040281	SAMN04327365	SRS1246218	2016-06-30	2016-01-12	Human	Human	Homo sapiens; Age: 90-99; stool	2015	9			North America	United States							Javiana					PulseNet Next Generation Subtyping Methods Unit		Javiana	D1	l,z28	1,5	Javiana	9	l,z28	1,5	24	17	Javiana	Lineage 3		13	12	17	16	13
SAL_FA9633AA	PNUSAS001187	SAL_FA9633AA	SAL_LA9694AA_AS	PRJNA230403	SRP040281	SAMN04327364	SRS1246219	2016-06-30	2016-01-12	Human	Human	Homo sapiens; Age: 0-4; stool	2015	8			North America	United States							Javiana					PulseNet Next Generation Subtyping Methods Unit		Javiana	D1	l,z28	1,5	Javiana	9	l,z28	1,5	24	17	Javiana	Lineage 3		13	12	17	16	13
SAL_FA9730AA	FDA191533-5	SAL_FA9730AA	SAL_LA9590AA_AS	PRJNA186035	SRP018785	SAMN02845190	SRS1224021	2016-06-30	2015-01-01	Environment	Plant	shelled pecan	2002	8			North America	Mexico							Javiana	I				FDA/CFSAN		Javiana	D1	l,z28	1,5	Javiana	9	l,z28	1,5	24	17	Javiana	Lineage 3		13	12	17	16	13
SAL_GA0109AA	CFSAN038610	SAL_GA0109AA	SAL_LA5024AA_AS	PRJNA186035	SRP018785	SAMN04202022	SRS1124869	2016-06-30	2015-10-26	Environment	Plant	cucumbers	2015	8			North America	United States	Maryland						Javiana (Predicted)					FDA		Javiana	D1	l,z28	1,5	Javiana	9	l,z28	1,5	24	17	Javiana	Lineage 3		13	12	17	16	13
SAL_GA0327AA	71_G_259-sc-2280659	SAL_GA0327AA	SAL_LA9056AA_AS	PRJEB9121	ERP010196	SAMEA3447771	ERS745345	2016-06-30	2015-10-27																Javiana (Predicted)					The Wellcome Trust Sanger Institute		Javiana	D1	l,z28	1,5	Javiana	9	l,z28	1,5	1547	17	Javiana	Lineage 3		60	12	17	16	13
SAL_GA1653AA	BCW_4002	SAL_GA1653AA	SAL_LA7749AA_AS	PRJNA203445	SRP022914	SAMN02368814	SRS865295	2016-06-30	2016-03-05	Human	Human	Homo sapiens	2012				North America	United States	Minnesota						Javiana	I				University of California Davis - 100K Genome Project		Javiana	D1	l,z28	1,5	Javiana	9	l,z28	1,5	24	17	Javiana	Lineage 3		13	12	17	16	13
SAL_GA1655AA	BCW_3978	SAL_GA1655AA	SAL_LA7747AA_AS	PRJNA203445	SRP022914	SAMN02368795	SRS865298	2016-06-30	2016-03-05	Human	Human	Homo sapiens	2011				North America	United States	Georgia						Javiana	I				University of California Davis - 100K Genome Project		Javiana	D1	l,z28	1,5	Javiana	9	l,z28	1,5	24	17	Javiana	Lineage 3		13	12	17	16	13
SAL_GA1678AA	BCW_2878	SAL_GA1678AA	SAL_LA7717AA_AS	PRJNA203445	SRP022914	SAMN02368743	SRS865320	2016-06-30	2016-03-05																Javiana	I				University of California Davis - 100K Genome Project		Javiana	D1	l,z28	1,5	Javiana	9	l,z28	1,5	1674	17	Javiana	Lineage 3		13	12	17	520	13
SAL_GA2043AA	BCW_3958	SAL_GA2043AA	SAL_LA7326AA_AS	PRJNA203445	SRP022914	SAMN03357938	SRS854295	2016-06-30	2016-02-24	ND	ND/Others	culture													Javiana (Predicted)					University of California Davis - 100K Genome Project		Javiana	D1	l,z28	1,5	Javiana	9	l,z28	1,5	24	17	Javiana	Lineage 3		13	12	17	16	13
SAL_GA2044AA	BCW_3956	SAL_GA2044AA	SAL_LA7325AA_AS	PRJNA203445	SRP022914	SAMN03357937	SRS854296	2016-06-30	2016-02-24	ND	ND/Others	culture													Javiana (Predicted)					University of California Davis - 100K Genome Project		Javiana	D1	l,z28	1,5	Javiana	9	l,z28	1,5	24	17	Javiana	Lineage 3		13	12	17	16	13
SAL_GA2046AA	BCW_3425	SAL_GA2046AA	SAL_LA7323AA_AS	PRJNA203445	SRP022914	SAMN03358939	SRS854635	2016-06-30	2016-02-24	ND	ND/Others	culture													Javiana (Predicted)					University of California Davis - 100K Genome Project		Javiana	D1	l,z28	1,5	Javiana	9	l,z28	1,5	24	17	Javiana	Lineage 3		13	12	17	16	13
SAL_GA2072AA	BCW_3068	SAL_GA2072AA	SAL_LA7297AA_AS	PRJNA203445	SRP022914	SAMN03358786	SRS854790	2016-06-30	2016-02-24	ND	ND/Others	culture													Javiana (Predicted)					University of California Davis - 100K Genome Project		Javiana	D1	l,z28	1,5	Javiana	9	l,z28	1,5	24	17	Javiana	Lineage 3		13	12	17	16	13
SAL_GA2226AA	BCW_6021	SAL_GA2226AA	SAL_LA7143AA_AS	PRJNA203445	SRP022914	SAMN03359842	SRS855248	2016-06-30	2016-02-24	ND	ND/Others	culture																		University of California Davis - 100K Genome Project		Javiana	D1	l,z28	l,z13,z28		9	l,z28	-	24	17	Javiana	Lineage 3		13	12	17	16	13
SAL_GA2499AA	01-0173	SAL_GA2499AA	SAL_LA6784AA_AS	PRJNA203445	SRP022914	SAMN03264908	SRS816046	2016-06-30	2015-03-18																9,12:L,Z28:-	I				Centers for Disease Control and Prevention (CDC)		Javiana	D1	l,z28	l,z13,z28		9	l,z28	-	24	17	Javiana	Lineage 3		13	12	17	16	13
SAL_GA2522AA	06-0866	SAL_GA2522AA	SAL_LA6761AA_AS	PRJNA203445	SRP022914	SAMN03264907	SRS816023	2016-06-30	2015-03-18																9,12:L,Z28:-	I				Centers for Disease Control and Prevention (CDC)		Javiana	D1	l,z28	l,z13,z28		9	l,z28	-	24	17	Javiana	Lineage 3		13	12	17	16	13
SAL_GA2769AA	CRJJGF_00144	SAL_GA2769AA	SAL_LA5164AA_AS	PRJNA254816	SRP050382	SAMN02908650	SRS775409	2016-06-30	2015-12-01	Companion Animal	Canine	dog	2004				North America	United States							Javiana					Agricultural Research Service, United States Department of Agriculture		Javiana	D1	l,z28	1,5	Javiana	9	l,z28	1,5	24	17	Javiana	Lineage 3		13	12	17	16	13
SAL_GA2829AA	CRJJGF_00082	SAL_GA2829AA	SAL_LA5104AA_AS	PRJNA254816	SRP050382	SAMN02908589	SRS775349	2016-06-30	2015-12-01	Livestock	Equine	horse	2003				North America	United States							Javiana					Agricultural Research Service, United States Department of Agriculture		Javiana	D1	l,z28	1,5	Javiana	9	l,z28	1,5	24	17	Javiana	Lineage 3		13	12	17	16	13
SAL_GA3111AA	NCTR-RN607	SAL_GA3111AA	SAL_LA6359AA_AS	PRJNA203445	SRP022914	SAMN02368401	SRS536074	2016-07-01	2015-07-22	Human	Human	Homo sapiens	2003				North America	United States	Arkansas						Javiana	I				University of California at Davis 100K Pathogen Genome Project		Javiana	D1	l,z28	1,5	Javiana	9	l,z28	1,5	24	17	Javiana	Lineage 3		13	12	17	16	13
SAL_GA3112AA	NCTR-RN575	SAL_GA3112AA	SAL_LA6358AA_AS	PRJNA203445	SRP022914	SAMN02368400	SRS536073	2016-07-01	2015-07-22	Human	Human	Homo sapiens	2002				North America	United States	Arkansas						Javiana	I				University of California at Davis 100K Pathogen Genome Project		Javiana	D1	l,z28	1,5	Javiana	9	l,z28	1,5	24	17	Javiana	Lineage 3		13	12	17	16	13
SAL_GA3113AA	BCW_3424	SAL_GA3113AA	SAL_LA6357AA_AS	PRJNA203445	SRP022914	SAMN02368399	SRS536072	2016-07-01	2015-07-22	Human	Human	Homo sapiens	2002				North America	United States	Arkansas						Javiana	I				University of California Davis - 100K Genome Project		Javiana	D1	l,z28	1,5	Javiana	9	l,z28	1,5	371	17	Javiana	Lineage 3		13	12	17	16	117
SAL_GA3114AA	NCTR-RN482	SAL_GA3114AA	SAL_LA6356AA_AS	PRJNA203445	SRP022914	SAMN02368397	SRS536071	2016-07-01	2015-07-22	Human	Human	Homo sapiens	2003				North America	United States	Arkansas						Javiana	I				University of California at Davis 100K Pathogen Genome Project		Javiana	D1	l,z28	1,5	Javiana	9	l,z28	1,5	24	17	Javiana	Lineage 3		13	12	17	16	13
SAL_GA3303AA	CDC B1171	SAL_GA3303AA	SAL_LA6166AA_AS	PRJNA203445	SRP022914	SAMN02367737	SRS535856	2016-07-01	2015-07-22	Human	Human	Homo sapiens; human					North America	United States	North Carolina						Panama	I				University of California at Davis 100K Pathogen Genome Project		Javiana	D1	l,z28	1,5	Javiana	9	l,z28	1,5	24	17	Javiana	Lineage 3		13	12	17	16	13
SAL_GA3375AA	BCW_3423	SAL_GA3375AA	SAL_LA6094AA_AS	PRJNA203445	SRP022914	SAMN02368398	SRS529023	2016-07-01	2015-07-22	Human	Human	Homo sapiens	2002				North America	United States	Arkansas						Javiana	I				University of California Davis - 100K Genome Project		Javiana	D1	l,z28	1,5	Javiana	9	l,z28	1,5	24	17	Javiana	Lineage 3		13	12	17	16	13
SAL_GA3436AA	BCW_4008	SAL_GA3436AA	SAL_LA6032AA_AS	PRJNA203445	SRP022914	SAMN02368819	SRS528881	2016-07-01	2015-07-22	Human	Human	Homo sapiens	2012				North America	United States	Virginia						Javiana	I				University of California Davis - 100K Genome Project		Javiana	D1	l,z28	1,5	Javiana	9	l,z28	1,5	24	17	Javiana	Lineage 3		13	12	17	16	13
SAL_GA3448AA	BCW_3988	SAL_GA3448AA	SAL_LA6020AA_AS	PRJNA203445	SRP022914	SAMN02368805	SRS528869	2016-07-01	2015-07-22	Human	Human	Homo sapiens	2012				North America	United States	Georgia						Javiana	I				University of California Davis - 100K Genome Project		Javiana	D1	l,z28	1,5	Javiana	9	l,z28	1,5	24	17	Javiana	Lineage 3		13	12	17	16	13
SAL_GA3460AA	BCW_3973	SAL_GA3460AA	SAL_LA6008AA_AS	PRJNA203445	SRP022914	SAMN02368791	SRS528857	2016-07-01	2015-07-22	Human	Human	Homo sapiens	2010				North America	United States	Indiana						Javiana	I				University of California Davis - 100K Genome Project		Javiana	D1	l,z28	1,5	Javiana	9	l,z28	1,5	24	17	Javiana	Lineage 3		13	12	17	16	13
SAL_GA3471AA	BCW_3959	SAL_GA3471AA	SAL_LA5997AA_AS	PRJNA203445	SRP022914	SAMN02368778	SRS528846	2016-07-01	2015-07-22																Javiana	I				University of California Davis - 100K Genome Project		Javiana	D1	l,z28	1,5	Javiana	9	l,z28	1,5	24	17	Javiana	Lineage 3		13	12	17	16	13
SAL_GA3472AA	BCW_3957	SAL_GA3472AA	SAL_LA5996AA_AS	PRJNA203445	SRP022914	SAMN02368777	SRS528845	2016-07-01	2015-07-22																Javiana	I				University of California Davis - 100K Genome Project		Javiana	D1	l,z28	1,5	Javiana	9	l,z28	1,5	24	17	Javiana	Lineage 3		13	12	17	16	13
SAL_GA3607AA	BCW_2707	SAL_GA3607AA	SAL_LA5861AA_AS	PRJNA203445	SRP022914	SAMN02368584	SRS528710	2016-07-01	2015-07-22	Food	ND/Others	food (Import)	2006				Europe	Denmark							Javiana	I				University of California Davis - 100K Genome Project		Javiana	D1	l,z28	1,5	Javiana	9	l,z28	1,5	437	17	Javiana	Lineage 3		13	12	63	16	13
SAL_GA3608AA	BCW_2706	SAL_GA3608AA	SAL_LA5860AA_AS	PRJNA203445	SRP022914	SAMN02368583	SRS528709	2016-07-01	2015-07-22	Human	Human	Homo sapiens; human	2002				Asia	Taiwan							Javiana	I				University of California Davis - 100K Genome Project		Javiana	D1	l,z28	1,5	Javiana	9	l,z28	1,5	1547	17	Javiana	Lineage 3		60	12	17	16	13
SAL_GA3838AA	BCW_1604	SAL_GA3838AA	SAL_LA5630AA_AS	PRJNA203445	SRP022914	SAMN02367639	SRS519677	2016-07-01	2015-07-22																Javiana	I				University of California Davis - 100K Genome Project		Javiana	D1	l,z28	1,5	Javiana	9	l,z28	1,5	24	17	Javiana	Lineage 3		13	12	17	16	13
SAL_GA4473AA	FDA474835-2	SAL_GA4473AA	SAL_LA6537AA_AS	PRJNA186035	SRP018785	SAMN01938998	SRS1540219	2016-07-06	2015-01-01	Environment	Water/River	Canal Water	2009	9			North America	Mexico							Javiana	I				US Food and Drug Administration		Javiana	D1	l,z28	1,5	Javiana	9	l,z28	1,5	24	17	Javiana	Lineage 3		13	12	17	16	13
SAL_GA4474AA	FDA474836-10	SAL_GA4474AA	SAL_LA6536AA_AS	PRJNA186035	SRP018785	SAMN02846138	SRS1540214	2016-07-06	2015-01-01	Environment	Soil/Dust	environmental swab	2009	9			North America	Mexico							Javiana	I				FDA Center for Food Safety and Applied Nutrition		Javiana	D1	l,z28	1,5	Javiana	9	l,z28	1,5	24	17	Javiana	Lineage 3		13	12	17	16	13
SAL_GA4502AA	FDA474839-2	SAL_GA4502AA	SAL_LA7416AA_AS	PRJNA186035	SRP018785	SAMN02846139	SRS1544169	2016-07-07	2015-01-01	Environment	Water/River	water with snail shells	2009	9			North America	Mexico							Javiana	I				FDA/CFSAN		Javiana	D1	l,z28	1,5	Javiana	9	l,z28	1,5	24	17	Javiana	Lineage 3		13	12	17	16	13
SAL_GA4507AA	CFSAN048006	SAL_GA4507AA	SAL_LA6997AA_AS	PRJNA186035	SRP018785	SAMN04563719	SRS1550425	2016-07-09	2015-01-01	Environment	Water/River	creek water	2015	8			North America	United States	Virginia						Javiana (Predicted)					FDA Center for Food Safety and Applied Nutrition		Javiana	D1	l,z28	1,5	Javiana	9	l,z28	1,5	24	17	Javiana	Lineage 3		13	12	17	16	13
SAL_GA4508AA	CFSAN048005	SAL_GA4508AA	SAL_LA6996AA_AS	PRJNA186035	SRP018785	SAMN04563718	SRS1550419	2016-07-09	2015-01-01	Environment	Water/River	creek water	2015	8			North America	United States	Virginia						Javiana (Predicted)					FDA Center for Food Safety and Applied Nutrition		Javiana	D1	l,z28	1,5	Javiana	9	l,z28	1,5	24	17	Javiana	Lineage 3		13	12	17	16	13
SAL_GA4509AA	CFSAN048003	SAL_GA4509AA	SAL_LA6995AA_AS	PRJNA186035	SRP018785	SAMN04563716	SRS1550416	2016-07-09	2015-01-01	Environment	Water/River	creek water	2015	8			North America	United States	Virginia						Javiana (Predicted)					FDA Center for Food Safety and Applied Nutrition		Javiana	D1	l,z28	1,5	Javiana	9	l,z28	1,5	24	17	Javiana	Lineage 3		13	12	17	16	13
SAL_GA4510AA	CFSAN048002	SAL_GA4510AA	SAL_LA6994AA_AS	PRJNA186035	SRP018785	SAMN04563715	SRS1550413	2016-07-09	2015-01-01	Environment	Water/River	creek water	2015	8			North America	United States	Virginia						Javiana (Predicted)					FDA Center for Food Safety and Applied Nutrition		Javiana	D1	l,z28	1,5	Javiana	9	l,z28	1,5	24	17	Javiana	Lineage 3		13	12	17	16	13
SAL_GA4511AA	CFSAN048001	SAL_GA4511AA	SAL_LA6993AA_AS	PRJNA186035	SRP018785	SAMN04563714	SRS1550411	2016-07-09	2015-01-01	Environment	Water/River	creek water	2015	8			North America	United States	Virginia						Javiana (Predicted)					FDA Center for Food Safety and Applied Nutrition		Javiana	D1	l,z28	1,5	Javiana	9	l,z28	1,5	24	17	Javiana	Lineage 3		13	12	17	16	13
SAL_GA4512AA	CFSAN047999	SAL_GA4512AA	SAL_LA6992AA_AS	PRJNA186035	SRP018785	SAMN04563712	SRS1550408	2016-07-09	2015-01-01	Environment	Water/River	creek water	2015	8			North America	United States	Virginia						Javiana (Predicted)					FDA Center for Food Safety and Applied Nutrition		Javiana	D1	l,z28	1,5	Javiana	9	l,z28	1,5	24	17	Javiana	Lineage 3		13	12	17	16	13
SAL_GA4513AA	CFSAN047998	SAL_GA4513AA	SAL_LA6991AA_AS	PRJNA186035	SRP018785	SAMN04563711	SRS1550405	2016-07-09	2015-01-01	Environment	Water/River	creek water	2015	8			North America	United States	Virginia						Javiana (Predicted)					FDA Center for Food Safety and Applied Nutrition		Javiana	D1	l,z28	1,5	Javiana	9	l,z28	1,5	24	17	Javiana	Lineage 3		13	12	17	16	13
SAL_GA4514AA	CFSAN047997	SAL_GA4514AA	SAL_LA6990AA_AS	PRJNA186035	SRP018785	SAMN04563710	SRS1550401	2016-07-09	2015-01-01	Environment	Water/River	creek water	2015	8			North America	United States	Virginia						Javiana (Predicted)					FDA Center for Food Safety and Applied Nutrition		Javiana	D1	l,z28	1,5	Javiana	9	l,z28	1,5	24	17	Javiana	Lineage 3		13	12	17	16	13
SAL_GA4516AA	CFSAN047995	SAL_GA4516AA	SAL_LA6988AA_AS	PRJNA186035	SRP018785	SAMN04563708	SRS1550396	2016-07-09	2015-01-01	Environment	Water/River	creek water	2015	8			North America	United States	Virginia						Javiana (Predicted)					FDA Center for Food Safety and Applied Nutrition		Javiana	D1	l,z28	1,5	Javiana	9	l,z28	1,5	24	17	Javiana	Lineage 3		13	12	17	16	13
SAL_GA4518AA	CFSAN047993	SAL_GA4518AA	SAL_LA6986AA_AS	PRJNA186035	SRP018785	SAMN04563706	SRS1550390	2016-07-09	2015-01-01	Environment	Water/River	creek water	2015	8			North America	United States	Virginia						Javiana (Predicted)					FDA Center for Food Safety and Applied Nutrition		Javiana	D1	l,z28	1,5	Javiana	9	l,z28	1,5	24	17	Javiana	Lineage 3		13	12	17	16	13
SAL_GA4520AA	CFSAN047991	SAL_GA4520AA	SAL_LA6984AA_AS	PRJNA186035	SRP018785	SAMN04563704	SRS1550381	2016-07-09	2015-01-01	Environment	Water/River	creek water	2015	8			North America	United States	Virginia						Javiana (Predicted)					FDA Center for Food Safety and Applied Nutrition		Javiana	D1	l,z28	1,5	Javiana	9	l,z28	1,5	24	17	Javiana	Lineage 3		13	12	17	16	13
SAL_GA4521AA	CFSAN047990	SAL_GA4521AA	SAL_LA6983AA_AS	PRJNA186035	SRP018785	SAMN04563703	SRS1550377	2016-07-09	2015-01-01	Environment	Water/River	creek water	2015	8			North America	United States	Virginia						Javiana (Predicted)					FDA Center for Food Safety and Applied Nutrition		Javiana	D1	l,z28	1,5	Javiana	9	l,z28	1,5	24	17	Javiana	Lineage 3		13	12	17	16	13
SAL_GA4522AA	CFSAN047989	SAL_GA4522AA	SAL_LA6982AA_AS	PRJNA186035	SRP018785	SAMN04563702	SRS1550374	2016-07-09	2015-01-01	Environment	Water/River	creek water	2015	8			North America	United States	Virginia						Javiana (Predicted)					FDA Center for Food Safety and Applied Nutrition		Javiana	D1	l,z28	1,5	Javiana	9	l,z28	1,5	24	17	Javiana	Lineage 3		13	12	17	16	13
SAL_GA4523AA	CFSAN047988	SAL_GA4523AA	SAL_LA6981AA_AS	PRJNA186035	SRP018785	SAMN04563700	SRS1550371	2016-07-09	2015-01-01	Environment	Water/River	creek water	2015	8			North America	United States	Virginia						Javiana (Predicted)					FDA Center for Food Safety and Applied Nutrition		Javiana	D1	l,z28	1,5	Javiana	9	l,z28	1,5	24	17	Javiana	Lineage 3		13	12	17	16	13
SAL_GA4524AA	CFSAN047987	SAL_GA4524AA	SAL_LA6980AA_AS	PRJNA186035	SRP018785	SAMN04563699	SRS1550368	2016-07-09	2015-01-01	Environment	Water/River	creek water	2015	8			North America	United States	Virginia						Javiana (Predicted)					FDA Center for Food Safety and Applied Nutrition		Javiana	D1	l,z28	1,5	Javiana	9	l,z28	1,5	24	17	Javiana	Lineage 3		13	12	17	16	13
SAL_GA4525AA	CFSAN047985	SAL_GA4525AA	SAL_LA6979AA_AS	PRJNA186035	SRP018785	SAMN04563697	SRS1550365	2016-07-09	2015-01-01	Environment	Water/River	creek water	2015	8			North America	United States	Virginia						Javiana (Predicted)					FDA Center for Food Safety and Applied Nutrition		Javiana	D1	l,z28	1,5	Javiana	9	l,z28	1,5	24	17	Javiana	Lineage 3		13	12	17	16	13
SAL_GA4526AA	CFSAN047984	SAL_GA4526AA	SAL_LA6978AA_AS	PRJNA186035	SRP018785	SAMN04563696	SRS1550361	2016-07-09	2015-01-01	Environment	Water/River	creek water	2015	8			North America	United States	Virginia						Javiana (Predicted)					FDA Center for Food Safety and Applied Nutrition		Javiana	D1	l,z28	1,5	Javiana	9	l,z28	1,5	24	17	Javiana	Lineage 3		13	12	17	16	13
SAL_GA4527AA	CFSAN047983	SAL_GA4527AA	SAL_LA6977AA_AS	PRJNA186035	SRP018785	SAMN04563695	SRS1550358	2016-07-09	2015-01-01	Environment	Water/River	creek water	2015	8			North America	United States	Virginia						Javiana (Predicted)					FDA Center for Food Safety and Applied Nutrition		Javiana	D1	l,z28	1,5	Javiana	9	l,z28	1,5	24	17	Javiana	Lineage 3		13	12	17	16	13
SAL_GA4630AA	LH_M112	SAL_GA4630AA	SAL_LA8195AA_AS					2016-07-13	2017-01-15				2001				Oceania	Australia							Javiana	I				Lee Harrison		Javiana	D1	l,z28	1,5		9,46	l,z28	1,5	24	17	Javiana	Lineage 3		13	12	17	16	13
SAL_GA4782AA	PNUSAS002798	SAL_GA4782AA	SAL_MA0019AA_AS	PRJNA230403	SRP040281	SAMN05357763	SRS1561569	2016-07-18	2016-07-13	Human	Human	Age: 50-59; stool					North America	United States							Javiana					PulseNet Next Generation Subtyping Methods Unit		Javiana	D1	l,z28	1,5	Javiana	9	l,z28	1,5	24	17	Javiana	Lineage 3		13	12	17	16	13
SAL_GA4828AA	CFSAN048030	SAL_GA4828AA	SAL_LA9907AA_AS	PRJNA186035	SRP018785	SAMN04563743	SRS1553842	2016-07-18	2015-01-01	Environment	Soil/Dust	sediment	2015	8			North America	United States	Virginia						Javiana (Predicted)					FDA Center for Food Safety and Applied Nutrition		Javiana	D1	l,z28	1,5	Javiana	9	l,z28	1,5	24	17	Javiana	Lineage 3		13	12	17	16	13
SAL_GA4846AA	CFSAN048011	SAL_GA4846AA	SAL_LA9887AA_AS	PRJNA186035	SRP018785	SAMN04563724	SRS1553824	2016-07-18	2015-01-01	Environment	Water/River	creek water	2015	8			North America	United States	Virginia						Javiana (Predicted)					Food and Drug Administration - Center for Food Safety and Applied Nutrition (US)		Javiana	D1	l,z28	1,5	Javiana	9	l,z28	1,5	24	17	Javiana	Lineage 3		13	12	17	16	13
SAL_GA4847AA	CFSAN048010	SAL_GA4847AA	SAL_LA9886AA_AS	PRJNA186035	SRP018785	SAMN04563723	SRS1553823	2016-07-18	2015-01-01	Environment	Water/River	creek water	2015	8			North America	United States	Virginia						Javiana (Predicted)					Food and Drug Administration - Center for Food Safety and Applied Nutrition (US)		Javiana	D1	l,z28	1,5	Javiana	9	l,z28	1,5	24	17	Javiana	Lineage 3		13	12	17	16	13
SAL_GA4848AA	CFSAN048009	SAL_GA4848AA	SAL_LA9885AA_AS	PRJNA186035	SRP018785	SAMN04563722	SRS1553822	2016-07-18	2015-01-01	Environment	Water/River	creek water	2015	8			North America	United States	Virginia						Javiana (Predicted)					Food and Drug Administration - Center for Food Safety and Applied Nutrition (US)		Javiana	D1	l,z28	1,5	Javiana	9	l,z28	1,5	24	17	Javiana	Lineage 3		13	12	17	16	13
SAL_GA4849AA	CFSAN048008	SAL_GA4849AA	SAL_LA9884AA_AS	PRJNA186035	SRP018785	SAMN04563721	SRS1553821	2016-07-18	2015-01-01	Environment	Water/River	creek water	2015	8			North America	United States	Virginia						Javiana (Predicted)					Food and Drug Administration - Center for Food Safety and Applied Nutrition (US)		Javiana	D1	l,z28	1,5	Javiana	9	l,z28	1,5	24	17	Javiana	Lineage 3		13	12	17	16	13
SAL_GA4850AA	CFSAN048007	SAL_GA4850AA	SAL_LA9883AA_AS	PRJNA186035	SRP018785	SAMN04563720	SRS1553820	2016-07-18	2015-01-01	Environment	Water/River	creek water	2015	8			North America	United States	Virginia						Javiana (Predicted)					Food and Drug Administration - Center for Food Safety and Applied Nutrition (US)		Javiana	D1	l,z28	1,5	Javiana	9	l,z28	1,5	24	17	Javiana	Lineage 3		13	12	17	16	13
SAL_GA5158AA	V-CLASP-C-01	SAL_GA5158AA	SAL_MA0700AA_AS	PRJNA314600	SRP079001	SAMN05417612	SRS1572378	2016-07-20	2016-07-19	Companion Animal	Feline	Cat; feces	2012				North America	United States	North Carolina						Javiana					FDA		Javiana	D1	l,z28	1,5	Javiana	9	l,z28	1,5	24	17	Javiana	Lineage 3		13	12	17	16	13
SAL_GA5165AA	V-CLASP-D-55	SAL_GA5165AA	SAL_MA0693AA_AS	PRJNA314600	SRP079001	SAMN05417605	SRS1572371	2016-07-20	2016-07-19	Companion Animal	Canine	Dog; feces	2013				North America	United States	Texas						Javiana					FDA		Javiana	D1	l,z28	1,5	Javiana	9	l,z28	1,5	1674	17	Javiana	Lineage 3		13	12	17	520	13
SAL_GA5167AA	V-CLASP-D-53	SAL_GA5167AA	SAL_MA0691AA_AS	PRJNA314600	SRP079001	SAMN05417603	SRS1572369	2016-07-20	2016-07-19	Companion Animal	Canine	Dog; feces	2013				North America	United States	Texas						Javiana					FDA		Javiana	D1	l,z28	1,5	Javiana	9	l,z28	1,5	24	17	Javiana	Lineage 3		13	12	17	16	13
SAL_GA5197AA	V-CLASP-D-25	SAL_GA5197AA	SAL_MA0661AA_AS	PRJNA314600	SRP079001	SAMN05417573	SRS1572339	2016-07-20	2016-07-19	Companion Animal	Canine	Dog; feces	2012				North America	United States	North Carolina						Javiana					FDA		Javiana	D1	l,z28	1,5	Javiana	9	l,z28	1,5	24	17	Javiana	Lineage 3		13	12	17	16	13
SAL_GA5206AA	V-CLASP-D-16	SAL_GA5206AA	SAL_MA0652AA_AS	PRJNA314600	SRP079001	SAMN05417564	SRS1572330	2016-07-20	2016-07-19	Companion Animal	Canine	Dog; feces	2012				North America	United States	Georgia						Javiana					FDA		Javiana	D1	l,z28	1,5	Javiana	9	l,z28	1,5	24	17	Javiana	Lineage 3		13	12	17	16	13
SAL_GA5207AA	V-CLASP-D-15	SAL_GA5207AA	SAL_MA0651AA_AS	PRJNA314600	SRP079001	SAMN05417563	SRS1572329	2016-07-20	2016-07-19	Companion Animal	Canine	Dog; feces	2012				North America	United States	Georgia						Javiana					FDA		Javiana	D1	l,z28	1,5	Javiana	9	l,z28	1,5	24	17	Javiana	Lineage 3		13	12	17	16	13
SAL_GA5448AA	PNUSAS002928	SAL_GA5448AA	SAL_MA1230AA_AS	PRJNA230403	SRP040281	SAMN05371966	SRS1572845	2016-07-21	2016-07-20	Human	Human	Age: 50-59; stool	2016	6			North America	United States							Javiana (Predicted)					PulseNet Next Generation Subtyping Methods Unit		Javiana	D1	l,z28	1,5	Javiana	9	l,z28	1,5	24	17	Javiana	Lineage 3		13	12	17	16	13
SAL_GA5529AA	PNUSAS002899	SAL_GA5529AA	SAL_MA1149AA_AS	PRJNA230403	SRP040281	SAMN05379472	SRS1572759	2016-07-21	2016-07-20	Human	Human	Age: 80-89; stool	2016	6			North America	United States							Javiana					PulseNet Next Generation Subtyping Methods Unit		Javiana	D1	l,z28	1,5	Javiana	9	l,z28	1,5	24	17	Javiana	Lineage 3		13	12	17	16	13
SAL_GA5532AA	PNUSAS002898	SAL_GA5532AA	SAL_MA1146AA_AS	PRJNA230403	SRP040281	SAMN05379471	SRS1572756	2016-07-21	2016-07-20	Human	Human	Age: 60-69; stool	2016	6			North America	United States							Javiana (Predicted)					PulseNet Next Generation Subtyping Methods Unit		Javiana	D1	l,z28	1,5	Javiana	9	l,z28	1,5	24	17	Javiana	Lineage 3		13	12	17	16	13
SAL_GA5536AA	CFSAN039231	SAL_GA5536AA	SAL_MA1142AA_AS	PRJNA186035	SRP018785	SAMN04915580	SRS1572752	2016-07-21	2015-01-01	Environment	Water/River	water	2015	6			North America	United States	New Jersey						Javiana (Predicted)					FDA Center for Food Safety and Applied Nutrition		Javiana	D1	l,z28	1,5	Javiana	9	l,z28	1,5	24	17	Javiana	Lineage 3		13	12	17	16	13
SAL_GA5984AA	FDA497802 2-20	SAL_GA5984AA	SAL_MA2379AA_AS	PRJNA186035	SRP018785	SAMN02846264	SRS1584849	2016-07-28	2015-01-01	Environment	Plant	cantaloupe	2008	10			North America	Mexico							Javiana	I				FDA/CFSAN		Javiana	D1	l,z28	1,5	Javiana	9	l,z28	1,5	24	17	Javiana	Lineage 3		13	12	17	16	13
SAL_GA6133AA	FDA105249	SAL_GA6133AA	SAL_MA2529AA_AS	PRJNA186035	SRP018785	SAMN05291744	SRS1591781	2016-07-30	2015-01-01	Aquatic Animal	Shellfish	FROZEN UNCOOKED SHRIMP	2000	7			South America	Venezuela							Javiana (Predicted)					FDA Center for Food Safety and Applied Nutrition		Javiana	B	l,z28	1,5		-	l,z28	1,5	24	17	Javiana	Lineage 3		13	12	17	16	13
SAL_GA6327AA	CFSAN048050	SAL_GA6327AA	SAL_MA2736AA_AS	PRJNA186035	SRP018785	SAMN04933259	SRS1597272	2016-08-03	2015-01-01	Environment	Water/River	creek water	2015	9			North America	United States	Virginia						Javiana (Predicted)					FDA Center for Food Safety and Applied Nutrition		Javiana	D1	l,z28	1,5	Javiana	9	l,z28	1,5	24	17	Javiana	Lineage 3		13	12	17	16	13
SAL_GA6328AA	CFSAN048049	SAL_GA6328AA	SAL_MA2735AA_AS	PRJNA186035	SRP018785	SAMN04933258	SRS1597271	2016-08-03	2015-01-01	Environment	Water/River	creek water	2015	9			North America	United States	Virginia						Javiana (Predicted)					Food and Drug Administration - Center for Food Safety and Applied Nutrition (US)		Javiana	D1	l,z28	1,5	Javiana	9	l,z28	1,5	24	17	Javiana	Lineage 3		13	12	17	16	13
SAL_GA6329AA	CFSAN048048	SAL_GA6329AA	SAL_MA2734AA_AS	PRJNA186035	SRP018785	SAMN04933257	SRS1597270	2016-08-03	2015-01-01	Environment	Water/River	creek water	2015	9			North America	United States	Virginia						Javiana (Predicted)					Food and Drug Administration - Center for Food Safety and Applied Nutrition (US)		Javiana	D1	l,z28	1,5	Javiana	9	l,z28	1,5	24	17	Javiana	Lineage 3		13	12	17	16	13
SAL_GA6330AA	CFSAN048047	SAL_GA6330AA	SAL_MA2733AA_AS	PRJNA186035	SRP018785	SAMN04933256	SRS1597269	2016-08-03	2015-01-01	Environment	Water/River	creek water	2015	9			North America	United States	Virginia						Javiana (Predicted)					FDA Center for Food Safety and Applied Nutrition		Javiana	D1	l,z28	1,5	Javiana	9	l,z28	1,5	24	17	Javiana	Lineage 3		13	12	17	16	13
SAL_GA6337AA	CFSAN047982	SAL_GA6337AA	SAL_MA2726AA_AS	PRJNA186035	SRP018785	SAMN04563694	SRS1597260	2016-08-03	2015-01-01	Environment	Water/River	creek water	2015	8			North America	United States	Virginia						Javiana (Predicted)					FDA Center for Food Safety and Applied Nutrition		Javiana	D1	l,z28	1,5	Javiana	9	l,z28	1,5	24	17	Javiana	Lineage 3		13	12	17	16	13
SAL_GA6338AA	CFSAN047981	SAL_GA6338AA	SAL_MA2725AA_AS	PRJNA186035	SRP018785	SAMN04563693	SRS1597259	2016-08-03	2015-01-01	Environment	Water/River	creek water	2015	8			North America	United States	Virginia						Javiana (Predicted)					FDA Center for Food Safety and Applied Nutrition		Javiana	D1	l,z28	1,5	Javiana	9	l,z28	1,5	24	17	Javiana	Lineage 3		13	12	17	16	13
SAL_GA6339AA	CFSAN047980	SAL_GA6339AA	SAL_MA2724AA_AS	PRJNA186035	SRP018785	SAMN04563692	SRS1597258	2016-08-03	2015-01-01	Environment	Water/River	creek water	2015	8			North America	United States	Virginia						Javiana (Predicted)					FDA Center for Food Safety and Applied Nutrition		Javiana	D1	l,z28	1,5	Javiana	9	l,z28	1,5	24	17	Javiana	Lineage 3		13	12	17	16	13
SAL_GA6340AA	CFSAN047979	SAL_GA6340AA	SAL_MA2723AA_AS	PRJNA186035	SRP018785	SAMN04563691	SRS1597257	2016-08-03	2015-01-01	Environment	Water/River	creek water	2015	8			North America	United States	Virginia						Javiana (Predicted)					FDA Center for Food Safety and Applied Nutrition		Javiana	D1	l,z28	1,5	Javiana	9	l,z28	1,5	24	17	Javiana	Lineage 3		13	12	17	16	13
SAL_GA6341AA	CFSAN047978	SAL_GA6341AA	SAL_MA2722AA_AS	PRJNA186035	SRP018785	SAMN04563690	SRS1597256	2016-08-03	2015-01-01	Environment	Water/River	creek water	2015	8			North America	United States	Virginia						Javiana (Predicted)					FDA Center for Food Safety and Applied Nutrition		Javiana	D1	l,z28	1,5	Javiana	9	l,z28	1,5	24	17	Javiana	Lineage 3		13	12	17	16	13
SAL_GA6342AA	CFSAN047977	SAL_GA6342AA	SAL_MA2721AA_AS	PRJNA186035	SRP018785	SAMN04563689	SRS1597255	2016-08-03	2015-01-01	Environment	Water/River	creek water	2015	8			North America	United States	Virginia						Javiana (Predicted)					FDA Center for Food Safety and Applied Nutrition		Javiana	D1	l,z28	1,5	Javiana	9	l,z28	1,5	24	17	Javiana	Lineage 3		13	12	17	16	13
SAL_GA6343AA	CFSAN047976	SAL_GA6343AA	SAL_MA2720AA_AS	PRJNA186035	SRP018785	SAMN04563688	SRS1597254	2016-08-03	2015-01-01	Environment	Water/River	creek water	2015	8			North America	United States	Virginia						Javiana (Predicted)					FDA Center for Food Safety and Applied Nutrition		Javiana	D1	l,z28	1,5	Javiana	9	l,z28	1,5	24	17	Javiana	Lineage 3		13	12	17	16	13
SAL_GA6359AA	CFSAN048062	SAL_GA6359AA	SAL_MA2704AA_AS	PRJNA186035	SRP018785	SAMN04933271	SRS1596983	2016-08-03	2015-01-01	Environment	Water/River	creek water	2015	9			North America	United States	Virginia						Javiana (Predicted)					FDA Center for Food Safety and Applied Nutrition		Javiana	D1	l,z28	1,5	Javiana	9	l,z28	1,5	24	17	Javiana	Lineage 3		13	12	17	16	13
SAL_GA6360AA	CFSAN048061	SAL_GA6360AA	SAL_MA2703AA_AS	PRJNA186035	SRP018785	SAMN04933270	SRS1596982	2016-08-03	2015-01-01	Environment	Water/River	creek water	2015	9			North America	United States	Virginia						Javiana (Predicted)					FDA Center for Food Safety and Applied Nutrition		Javiana	D1	l,z28	1,5	Javiana	9	l,z28	1,5	24	17	Javiana	Lineage 3		13	12	17	16	13
SAL_GA6361AA	CFSAN048060	SAL_GA6361AA	SAL_MA2702AA_AS	PRJNA186035	SRP018785	SAMN04933269	SRS1596981	2016-08-03	2015-01-01	Environment	Water/River	creek water	2015	9			North America	United States	Virginia						Javiana (Predicted)					FDA Center for Food Safety and Applied Nutrition		Javiana	D1	l,z28	1,5	Javiana	9	l,z28	1,5	24	17	Javiana	Lineage 3		13	12	17	16	13
SAL_GA6364AA	CFSAN048056	SAL_GA6364AA	SAL_MA2699AA_AS	PRJNA186035	SRP018785	SAMN04933265	SRS1596978	2016-08-03	2015-01-01	Environment	Water/River	creek water	2015	9			North America	United States	Virginia						Javiana (Predicted)					FDA Center for Food Safety and Applied Nutrition		Javiana	D1	l,z28	1,5	Javiana	9	l,z28	1,5	24	17	Javiana	Lineage 3		13	12	17	16	13
SAL_GA6464AA	PNUSAS003072	SAL_GA6464AA	SAL_MA2882AA_AS	PRJNA230403	SRP040281	SAMN05437592	SRS1599136	2016-08-04	2016-08-03	Human	Human	Age: 40-49; stool	2016	7			North America	United States							Javiana					PulseNet Next Generation Subtyping Methods Unit		Javiana	D1	l,z28	1,5	Javiana	9	l,z28	1,5	24	17	Javiana	Lineage 3		13	12	17	16	13
SAL_GA6634AA	PNUSAS003041	SAL_GA6634AA	SAL_MA2965AA_AS	PRJNA230403	SRP040281	SAMN05449423	SRS1601067	2016-08-05	2016-08-04								North America	United States							Javiana (Predicted)					PulseNet Next Generation Subtyping Methods Unit		Javiana	B	l,z28	1,5		-	l,z28	1,5	24	17	Javiana	Lineage 3		13	12	17	16	13
SAL_GA6635AA	PNUSAS003040	SAL_GA6635AA	SAL_MA2964AA_AS	PRJNA230403	SRP040281	SAMN05449424	SRS1601066	2016-08-05	2016-08-04								North America	United States							Javiana (Predicted)					PulseNet Next Generation Subtyping Methods Unit		Javiana	D1	l,z28	1,5	Javiana	9	l,z28	1,5	24	17	Javiana	Lineage 3		13	12	17	16	13
SAL_GA6636AA	PNUSAS003039	SAL_GA6636AA	SAL_MA2963AA_AS	PRJNA230403	SRP040281	SAMN05449425	SRS1601059	2016-08-05	2016-08-04								North America	United States												PulseNet Next Generation Subtyping Methods Unit		Javiana	D1	l,z28	l,z13,z28		-	l,z28	-	24	17	Javiana	Lineage 3		13	12	17	16	13
SAL_GA6638AA	PNUSAS003037	SAL_GA6638AA	SAL_MA2961AA_AS	PRJNA230403	SRP040281	SAMN05449415	SRS1601057	2016-08-05	2016-08-04								North America	United States							Javiana (Predicted)					PulseNet Next Generation Subtyping Methods Unit		Javiana	D1	l,z28	1,5		9,46	l,z28	1,5	24	17	Javiana	Lineage 3		13	12	17	16	13
SAL_GA6639AA	PNUSAS003038	SAL_GA6639AA	SAL_MA2960AA_AS	PRJNA230403	SRP040281	SAMN05449416	SRS1601056	2016-08-05	2016-08-04								North America	United States							Javiana (Predicted)					PulseNet Next Generation Subtyping Methods Unit		Javiana	B	l,z28	1,5		-	l,z28	1,5	24	17	Javiana	Lineage 3		13	12	17	16	13
SAL_GA6640AA	PNUSAS003036	SAL_GA6640AA	SAL_MA2959AA_AS	PRJNA230403	SRP040281	SAMN05449414	SRS1601055	2016-08-05	2016-08-04								North America	United States							Javiana (Predicted)					PulseNet Next Generation Subtyping Methods Unit		Javiana	D1	l,z28	1,5	Javiana	9	l,z28	1,5	24	17	Javiana	Lineage 3		13	12	17	16	13
SAL_GA7659AA	0000-0058-7853	SAL_GA7659AA	SAL_MA5464AA_AS	PRJNA278886	SRP056445	SAMN05374477	SRS1571662	2016-08-19	2016-07-25	Human	Human	Homo sapiens; Age: 50; female; stool	2016				North America	United States	Massachusetts	Suffolk County	Boston				Javiana (Predicted)					Brigham & Women's Hospital		Javiana	D1	l,z28	1,5	Javiana	9	l,z28	1,5	24	17	Javiana	Lineage 3		13	12	17	16	13
SAL_GA7816AA	2014AM-1951	SAL_GA7816AA	SAL_MA6279AA_AS	PRJNA287785	SRP082403	SAMN05596698	SRS1629407	2016-08-20	2016-08-19								North America	United States							Javiana (Predicted)					Centers for Disease Control and Prevention Enteric Diseases Laboratory Branch		Javiana	D1	l,z28	1,5	Javiana	9	l,z28	1,5	24	17	Javiana	Lineage 3		13	12	17	16	13
SAL_GA7835AA	2014AM-1833	SAL_GA7835AA	SAL_MA6260AA_AS	PRJNA287785	SRP082403	SAMN05596493	SRS1629386	2016-08-20	2016-08-19	Human	Human	Age: 20-29; stool	2014	8			North America	United States							Javiana (Predicted)					Centers for Disease Control and Prevention Enteric Diseases Laboratory Branch		Javiana	D1	l,z28	1,5	Javiana	9	l,z28	1,5	24	17	Javiana	Lineage 3		13	12	17	16	13
SAL_GA7862AA	2014AM-2900	SAL_GA7862AA	SAL_MA6232AA_AS	PRJNA287785	SRP082403	SAMN05596367	SRS1629359	2016-08-20	2016-08-19								North America	United States							Javiana (Predicted)					Centers for Disease Control and Prevention Enteric Diseases Laboratory Branch		Javiana	D1	l,z28	1,5	Javiana	9	l,z28	1,5	24	17	Javiana	Lineage 3		13	12	17	16	13
SAL_GA7866AA	2014AM-1521	SAL_GA7866AA	SAL_MA6228AA_AS	PRJNA287785	SRP082403	SAMN05596342	SRS1629355	2016-08-20	2016-08-19								North America	United States							Javiana (Predicted)					Centers for Disease Control and Prevention Enteric Diseases Laboratory Branch		Javiana	D1	l,z28	1,5	Javiana	9	l,z28	1,5	24	17	Javiana	Lineage 3		13	12	17	16	13
SAL_GA7872AA	2014AM-2349	SAL_GA7872AA	SAL_MA6222AA_AS	PRJNA287785	SRP082403	SAMN05596338	SRS1629349	2016-08-20	2016-08-19								North America	United States							Javiana (Predicted)					Centers for Disease Control and Prevention Enteric Diseases Laboratory Branch		Javiana	D1	l,z28	1,5	Javiana	9	l,z28	1,5	24	17	Javiana	Lineage 3		13	12	17	16	13
SAL_GA7881AA	2014AM-1199	SAL_GA7881AA	SAL_MA6213AA_AS	PRJNA287785	SRP082403	SAMN05596330	SRS1629340	2016-08-20	2016-08-19								North America	United States												Centers for Disease Control and Prevention Enteric Diseases Laboratory Branch		Javiana	D1	l,z28	l,z13,z28		9	l,z28	-	24	17	Javiana	Lineage 3		13	12	17	16	13
SAL_GA7916AA	2014AM-3055	SAL_GA7916AA	SAL_MA5565AA_AS	PRJNA287785	SRP082403	SAMN05596283	SRS1629266	2016-08-20	2016-08-19								North America	United States							Javiana (Predicted)					Centers for Disease Control and Prevention Enteric Diseases Laboratory Branch		Javiana	D1	l,z28	1,5	Javiana	9	l,z28	1,5	24	17	Javiana	Lineage 3		13	12	17	16	13
SAL_GA7956AA	2014AM-2764	SAL_GA7956AA	SAL_MA5525AA_AS	PRJNA287785	SRP082403	SAMN05596222	SRS1629224	2016-08-20	2016-08-19								North America	United States							Javiana (Predicted)					Centers for Disease Control and Prevention Enteric Diseases Laboratory Branch		Javiana	D1	l,z28	1,5	Javiana	9	l,z28	1,5	24	17	Javiana	Lineage 3		13	12	17	16	13
SAL_GA7958AA	2014AM-2767	SAL_GA7958AA	SAL_MA5523AA_AS	PRJNA287785	SRP082403	SAMN05596224	SRS1629222	2016-08-20	2016-08-19								North America	United States							Javiana (Predicted)					Centers for Disease Control and Prevention Enteric Diseases Laboratory Branch		Javiana	D1	l,z28	1,5	Javiana	9	l,z28	1,5	24	17	Javiana	Lineage 3		13	12	17	16	13
SAL_GA8012AA	CFSAN048031	SAL_GA8012AA	SAL_MA6359AA_AS	PRJNA186035	SRP018785	SAMN04563744	SRS1630010	2016-08-22	2015-01-01	Environment	Soil/Dust	sediment	2015	8			North America	United States	Virginia						Javiana (Predicted)					FDA Center for Food Safety and Applied Nutrition		Javiana	D1	l,z28	1,5	Javiana	9	l,z28	1,5	24	17	Javiana	Lineage 3		13	12	17	16	13
SAL_GA8014AA	CFSAN048004	SAL_GA8014AA	SAL_MA6357AA_AS	PRJNA186035	SRP018785	SAMN04563717	SRS1630009	2016-08-22	2015-01-01	Environment	Water/River	creek water	2015	8			North America	United States	Virginia						Javiana (Predicted)					FDA Center for Food Safety and Applied Nutrition		Javiana	D1	l,z28	1,5	Javiana	9	l,z28	1,5	24	17	Javiana	Lineage 3		13	12	17	16	13
SAL_GA8015AA	CFSAN048000	SAL_GA8015AA	SAL_MA6356AA_AS	PRJNA186035	SRP018785	SAMN04563713	SRS1630008	2016-08-22	2015-01-01	Environment	Water/River	creek water	2015	8			North America	United States	Virginia						Javiana (Predicted)					FDA Center for Food Safety and Applied Nutrition		Javiana	D1	l,z28	1,5	Javiana	9	l,z28	1,5	24	17	Javiana	Lineage 3		13	12	17	16	13
SAL_GA8016AA	CFSAN047986	SAL_GA8016AA	SAL_MA6355AA_AS	PRJNA186035	SRP018785	SAMN04563698	SRS1630007	2016-08-22	2015-01-01	Environment	Water/River	creek water	2015	8			North America	United States	Virginia						Javiana (Predicted)					FDA Center for Food Safety and Applied Nutrition		Javiana	D1	l,z28	1,5	Javiana	9	l,z28	1,5	24	17	Javiana	Lineage 3		13	12	17	16	13
SAL_GA8089AA	PNUSAS003438	SAL_GA8089AA	SAL_MA6505AA_AS	PRJNA230403	SRP040281	SAMN05579965	SRS1631533	2016-08-24	2016-08-22	Human	Human	Age: 0-4; stool	2016	7			North America	United States							Javiana (Predicted)					Center for Diease Control and Prevention - Enteric Diseases Laboratory Branch (US)		Javiana	D1	l,z28	1,5	Javiana	9	l,z28	1,5	24	17	Javiana	Lineage 3		13	12	17	16	13
SAL_GA8110AA	PNUSAS003345	SAL_GA8110AA	SAL_MA6484AA_AS	PRJNA230403	SRP040281	SAMN05558770	SRS1631495	2016-08-24	2016-08-22	Human	Human	Age: 0-4; stool	2016	6			North America	United States							Javiana					PulseNet Next Generation Subtyping Methods Unit		Javiana	D1	l,z28	1,5	Javiana	9	l,z28	1,5	24	17	Javiana	Lineage 3		13	12	17	16	13
SAL_GA8111AA	PNUSAS003344	SAL_GA8111AA	SAL_MA6483AA_AS	PRJNA230403	SRP040281	SAMN05558769	SRS1631494	2016-08-24	2016-08-22	Human	Human	Age: 70-79; stool	2016	7			North America	United States							Javiana (Predicted)					Center for Diease Control and Prevention - Enteric Diseases Laboratory Branch (US)		Javiana	D1	l,z28	1,5	Javiana	9	l,z28	1,5	24	17	Javiana	Lineage 3		13	12	17	16	13
SAL_GA8113AA	PNUSAS003341	SAL_GA8113AA	SAL_MA6481AA_AS	PRJNA230403	SRP040281	SAMN05558777	SRS1631492	2016-08-24	2016-08-22	Human	Human	Age: 0-4; stool	2016	7			North America	United States							Javiana					Center for Diease Control and Prevention - Enteric Diseases Laboratory Branch (US)		Javiana	D1	l,z28	1,5	Javiana	9	l,z28	1,5	24	17	Javiana	Lineage 3		13	12	17	16	13
SAL_GA8115AA	PNUSAS003339	SAL_GA8115AA	SAL_MA6479AA_AS	PRJNA230403	SRP040281	SAMN05558775	SRS1631490	2016-08-24	2016-08-22	Human	Human	Age: 50-59; stool	2016	7			North America	United States							Javiana					PulseNet Next Generation Subtyping Methods Unit		Javiana	D1	l,z28	1,5	Javiana	9	l,z28	1,5	24	17	Javiana	Lineage 3		13	12	17	16	13
SAL_GA8130AA	PNUSAS003550	SAL_GA8130AA	SAL_MA6464AA_AS	PRJNA230403	SRP040281	SAMN05591115	SRS1631475	2016-08-24	2016-08-22	Human	Human	Age: 50-59; stool	2016	7			North America	United States							Javiana (Predicted)					PulseNet Next Generation Subtyping Methods Unit		Javiana	D1	l,z28	1,5		-	l,z28	1,5	24	17	Javiana	Lineage 3		13	12	17	16	13
SAL_GA8131AA	PNUSAS003548	SAL_GA8131AA	SAL_MA6463AA_AS	PRJNA230403	SRP040281	SAMN05591113	SRS1631474	2016-08-24	2016-08-22	Human	Human	Age: 0-4; stool	2016	7			North America	United States							Javiana (Predicted)					PulseNet Next Generation Subtyping Methods Unit		Javiana	B	l,z28	1,5		-	l,z28	1,5	2394	17	Javiana	Lineage 3		13	12	17	16	13
SAL_GA8183AA	FLUFL-1040	SAL_GA8183AA	SAL_MA6397AA_AS	PRJNA183848	SRP028812	SAMN02929608	SRS1631018	2016-08-24	2015-01-01	Environment	Water/River	pond water	2012	2			North America	United States	Georgia						Javiana (Predicted)					FDA/CFSAN		Javiana	D1	l,z28	1,5	Javiana	9	l,z28	1,5	24	17	Javiana	Lineage 3		13	12	17	16	13
SAL_GA8184AA	FLUFL-528	SAL_GA8184AA	SAL_MA6394AA_AS	PRJNA183848	SRP028812	SAMN03114930	SRS1631015	2016-08-24	2015-01-01	Environment	Soil/Dust	sediment	2011	7			North America	United States	Georgia						Javiana (Predicted)					FDA		Javiana	D1	l,z28	1,5	Javiana	9	l,z28	1,5	24	17	Javiana	Lineage 3		13	12	17	16	13
SAL_GA8207AA	PNUSAS003439	SAL_GA8207AA	SAL_MA6589AA_AS	PRJNA230403	SRP040281	SAMN05579966	SRS1636777	2016-08-25	2016-08-24	Human	Human	Age: 60-69; stool	2016	7			North America	United States							Javiana					PulseNet Next Generation Subtyping Methods Unit		Javiana	D1	l,z28	1,5	Javiana	9	l,z28	1,5	24	17	Javiana	Lineage 3		13	12	17	16	13
SAL_GA8587AA	FDA343627-12	SAL_GA8587AA	SAL_MA6992AA_AS	PRJNA186035	SRP018785	SAMN02845700	SRS1658341	2016-08-31	2015-01-01	Environment	Soil/Dust	black drum	2005	7			North America	Mexico							Javiana	I				FDA/CFSAN		Javiana	D1	l,z28	1,5	Javiana	9	l,z28	1,5	24	17	Javiana	Lineage 3		13	12	17	16	13
SAL_GA8588AA	FDA339653 2-1	SAL_GA8588AA	SAL_MA6948AA_AS	PRJNA186035	SRP018785	SAMN02845687	SRS1658340	2016-08-31	2015-01-01	Environment	Plant	cantaloupe	2006	11			North America	Mexico							Newport	I				FDA/CFSAN		Javiana	D1	l,z28	1,5	Javiana	9	l,z28	1,5	24	17	Javiana	Lineage 3		13	12	17	16	13
SAL_GA8636AA	PNUSAS003534	SAL_GA8636AA	SAL_MA7041AA_AS	PRJNA230403	SRP040281	SAMN05605409	SRS1659813	2016-09-01	2016-08-30	Human	Human	Age: 80-89; stool	2016	7			North America	United States							Javiana					PulseNet Next Generation Subtyping Methods Unit		Javiana	D1	l,z28	1,5	Javiana	9	l,z28	1,5	24	17	Javiana	Lineage 3		13	12	17	16	13
SAL_GA8648AA	PNUSAS003510	SAL_GA8648AA	SAL_MA7027AA_AS	PRJNA230403	SRP040281	SAMN05603491	SRS1659795	2016-09-01	2016-08-30	Human	Human	Age: 20-29; stool	2016	7			North America	United States							Javiana					PulseNet Next Generation Subtyping Methods Unit		Javiana	D1	l,z28	1,5	Javiana	9	l,z28	1,5	24	17	Javiana	Lineage 3		13	12	17	16	13
SAL_GA8665AA	PNUSAS003269	SAL_GA8665AA	SAL_MA7010AA_AS	PRJNA230403	SRP040281	SAMN05514469	SRS1659755	2016-09-01	2016-08-30								North America	United States							Javiana (Predicted)					PulseNet Next Generation Subtyping Methods Unit		Javiana	D1	l,z28	1,5	Javiana	9	l,z28	1,5	24	17	Javiana	Lineage 3		13	12	17	16	13
SAL_GA8666AA	PNUSAS003268	SAL_GA8666AA	SAL_MA7009AA_AS	PRJNA230403	SRP040281	SAMN05514468	SRS1659754	2016-09-01	2016-08-30								North America	United States							Javiana (Predicted)					PulseNet Next Generation Subtyping Methods Unit		Javiana	D1	l,z28	1,5	Javiana	9	l,z28	1,5	24	17	Javiana	Lineage 3		13	12	17	16	13
SAL_GA8672AA	PNUSAS003262	SAL_GA8672AA	SAL_MA7003AA_AS	PRJNA230403	SRP040281	SAMN05514462	SRS1659748	2016-09-01	2016-08-30								North America	United States							Javiana (Predicted)					PulseNet Next Generation Subtyping Methods Unit		Javiana	D1	l,z28	1,5	Javiana	9	l,z28	1,5	24	17	Javiana	Lineage 3		13	12	17	16	13
SAL_GA8755AA	FDA627655-1	SAL_GA8755AA	SAL_MA7277AA_AS	PRJNA186035	SRP018785	SAMN02846870	SRS1665479	2016-09-03	2015-01-01	Environment	Plant	fresh coriander	2010	5			North America	Trinidad and Tobago							Javiana	I				FDA Center for Food Safety and Applied Nutrition		Javiana	D1	l,z28	1,5	Javiana	9	l,z28	1,5	1674	17	Javiana	Lineage 3		13	12	17	520	13
SAL_GA8874AA	PNUSAS003433	SAL_GA8874AA	SAL_MA7475AA_AS	PRJNA230403	SRP040281	SAMN05579960	SRS1677119	2016-09-08	2016-09-07	Human	Human	Age: 40-49; stool	2016	7			North America	United States							Javiana					PulseNet Next Generation Subtyping Methods Unit		Javiana	D1	l,z28	1,5	Javiana	9	l,z28	1,5	24	17	Javiana	Lineage 3		13	12	17	16	13
SAL_GA8923AA	PNUSAS003632	SAL_GA8923AA	SAL_MA7426AA_AS	PRJNA230403	SRP040281	SAMN05713995	SRS1677070	2016-09-08	2016-09-07	Human	Human	Age: 5-9; stool	2016	7			North America	United States							Javiana					PulseNet Next Generation Subtyping Methods Unit		Javiana	D1	l,z28	1,5	Javiana	9	l,z28	1,5	1674	17	Javiana	Lineage 3		13	12	17	520	13
SAL_GA8996AA	CFSAN047958	SAL_GA8996AA	SAL_MA7584AA_AS	PRJNA186035	SRP018785	SAMN04563670	SRS1679542	2016-09-10	2015-01-01	Environment	Soil/Dust	sediment	2015	7			North America	United States	Virginia						Javiana (Predicted)					FDA Center for Food Safety and Applied Nutrition		Javiana	D1	l,z28	1,5	Javiana	9	l,z28	1,5	24	17	Javiana	Lineage 3		13	12	17	16	13
SAL_GA8998AA	CFSAN047956	SAL_GA8998AA	SAL_MA7582AA_AS	PRJNA186035	SRP018785	SAMN04563668	SRS1679540	2016-09-10	2015-01-01	Environment	Soil/Dust	sediment	2015	7			North America	United States	Virginia						Javiana (Predicted)					FDA Center for Food Safety and Applied Nutrition		Javiana	D1	l,z28	1,5	Javiana	9	l,z28	1,5	24	17	Javiana	Lineage 3		13	12	17	16	13
SAL_GA9008AA	CFSAN047924	SAL_GA9008AA	SAL_MA7572AA_AS	PRJNA186035	SRP018785	SAMN04563636	SRS1679531	2016-09-10	2015-01-01	Environment	Water/River	creek water	2015	7			North America	United States	Virginia						Javiana (Predicted)					FDA Center for Food Safety and Applied Nutrition		Javiana	D1	l,z28	1,5	Javiana	9	l,z28	1,5	24	17	Javiana	Lineage 3		13	12	17	16	13
SAL_GA9009AA	CFSAN047914	SAL_GA9009AA	SAL_MA7571AA_AS	PRJNA186035	SRP018785	SAMN04563626	SRS1679529	2016-09-10	2015-01-01	Environment	Water/River	creek water	2015	7			North America	United States	Virginia						Javiana (Predicted)					FDA Center for Food Safety and Applied Nutrition		Javiana	D1	l,z28	1,5	Javiana	9	l,z28	1,5	24	17	Javiana	Lineage 3		13	12	17	16	13
SAL_GA9015AA	CFSAN047925	SAL_GA9015AA	SAL_MA7565AA_AS	PRJNA186035	SRP018785	SAMN04563637	SRS1679497	2016-09-10	2015-01-01	Environment	Water/River	creek water	2015	7			North America	United States	Virginia						Javiana (Predicted)					FDA Center for Food Safety and Applied Nutrition		Javiana	D1	l,z28	1,5	Javiana	9	l,z28	1,5	24	17	Javiana	Lineage 3		13	12	17	16	13
SAL_GA9017AA	CFSAN047949	SAL_GA9017AA	SAL_MA7563AA_AS	PRJNA186035	SRP018785	SAMN04563661	SRS1679495	2016-09-10	2015-01-01	Environment	Water/River	creek water	2015	7			North America	United States	Virginia						Javiana (Predicted)					FDA Center for Food Safety and Applied Nutrition		Javiana	D1	l,z28	1,5	Javiana	9	l,z28	1,5	24	17	Javiana	Lineage 3		13	12	17	16	13
SAL_GA9023AA	CFSAN047921	SAL_GA9023AA	SAL_MA7557AA_AS	PRJNA186035	SRP018785	SAMN04563633	SRS1679488	2016-09-10	2015-01-01	Environment	Water/River	creek water	2015	7			North America	United States	Virginia						Javiana (Predicted)					FDA Center for Food Safety and Applied Nutrition		Javiana	D1	l,z28	1,5	Javiana	9	l,z28	1,5	24	17	Javiana	Lineage 3		13	12	17	16	13
SAL_GA9024AA	CFSAN047923	SAL_GA9024AA	SAL_MA7556AA_AS	PRJNA186035	SRP018785	SAMN04563635	SRS1679487	2016-09-10	2015-01-01	Environment	Water/River	creek water	2015	7			North America	United States	Virginia						Javiana (Predicted)					FDA Center for Food Safety and Applied Nutrition		Javiana	D1	l,z28	1,5	Javiana	9	l,z28	1,5	24	17	Javiana	Lineage 3		13	12	17	16	13
SAL_GA9025AA	CFSAN047920	SAL_GA9025AA	SAL_MA7555AA_AS	PRJNA186035	SRP018785	SAMN04563632	SRS1679466	2016-09-10	2015-01-01	Environment	Water/River	creek water	2015	7			North America	United States	Virginia						Javiana (Predicted)					FDA Center for Food Safety and Applied Nutrition		Javiana	D1	l,z28	1,5	Javiana	9	l,z28	1,5	24	17	Javiana	Lineage 3		13	12	17	16	13
SAL_GA9026AA	CFSAN047922	SAL_GA9026AA	SAL_MA7554AA_AS	PRJNA186035	SRP018785	SAMN04563634	SRS1679465	2016-09-10	2015-01-01	Environment	Water/River	creek water	2015	7			North America	United States	Virginia						Javiana (Predicted)					FDA Center for Food Safety and Applied Nutrition		Javiana	D1	l,z28	1,5	Javiana	9	l,z28	1,5	24	17	Javiana	Lineage 3		13	12	17	16	13
SAL_GA9029AA	CFSAN047917	SAL_GA9029AA	SAL_MA7551AA_AS	PRJNA186035	SRP018785	SAMN04563629	SRS1679462	2016-09-10	2015-01-01	Environment	Water/River	creek water	2015	7			North America	United States	Virginia						Javiana (Predicted)					FDA Center for Food Safety and Applied Nutrition		Javiana	D1	l,z28	1,5	Javiana	9	l,z28	1,5	24	17	Javiana	Lineage 3		13	12	17	16	13
SAL_GA9030AA	CFSAN047916	SAL_GA9030AA	SAL_MA7550AA_AS	PRJNA186035	SRP018785	SAMN04563628	SRS1679461	2016-09-10	2015-01-01	Environment	Water/River	creek water	2015	7			North America	United States	Virginia						Javiana (Predicted)					FDA Center for Food Safety and Applied Nutrition		Javiana	D1	l,z28	1,5	Javiana	9	l,z28	1,5	24	17	Javiana	Lineage 3		13	12	17	16	13
SAL_GA9031AA	CFSAN047915	SAL_GA9031AA	SAL_MA7549AA_AS	PRJNA186035	SRP018785	SAMN04563627	SRS1679460	2016-09-10	2015-01-01	Environment	Water/River	creek water	2015	7			North America	United States	Virginia						Javiana (Predicted)					FDA Center for Food Safety and Applied Nutrition		Javiana	D1	l,z28	1,5	Javiana	9	l,z28	1,5	24	17	Javiana	Lineage 3		13	12	17	16	13
SAL_GA9042AA	CFSAN047903	SAL_GA9042AA	SAL_MA7538AA_AS	PRJNA186035	SRP018785	SAMN04563615	SRS1679364	2016-09-10	2015-01-01	Environment	Water/River	creek water	2015	7			North America	United States	Virginia						Javiana (Predicted)					FDA Center for Food Safety and Applied Nutrition		Javiana	D1	l,z28	1,5	Javiana	9	l,z28	1,5	24	17	Javiana	Lineage 3		13	12	17	16	13
SAL_GA9044AA	CFSAN047901	SAL_GA9044AA	SAL_MA7536AA_AS	PRJNA186035	SRP018785	SAMN04563613	SRS1679337	2016-09-10	2015-01-01	Environment	Water/River	creek water	2015	7			North America	United States	Virginia						Javiana (Predicted)					FDA Center for Food Safety and Applied Nutrition		Javiana	D1	l,z28	1,5	Javiana	9	l,z28	1,5	24	17	Javiana	Lineage 3		13	12	17	16	13
SAL_GA9046AA	CFSAN047899	SAL_GA9046AA	SAL_MA7534AA_AS	PRJNA186035	SRP018785	SAMN04563610	SRS1679336	2016-09-10	2015-01-01	Environment	Water/River	creek water	2015	7			North America	United States	Virginia						Javiana (Predicted)					FDA Center for Food Safety and Applied Nutrition		Javiana	D1	l,z28	1,5	Javiana	9	l,z28	1,5	24	17	Javiana	Lineage 3		13	12	17	16	13
SAL_GA9048AA	CFSAN047897	SAL_GA9048AA	SAL_MA7532AA_AS	PRJNA186035	SRP018785	SAMN04563608	SRS1679334	2016-09-10	2015-01-01	Environment	Water/River	creek water	2015	7			North America	United States	Virginia						Javiana (Predicted)					FDA Center for Food Safety and Applied Nutrition		Javiana	D1	l,z28	1,5	Javiana	9	l,z28	1,5	24	17	Javiana	Lineage 3		13	12	17	16	13
SAL_GA9283AA	2016K-0780	SAL_GA9283AA	SAL_MA7771AA_AS	PRJNA230403	SRP040281	SAMN05773409	SRS1692834	2016-09-16	2016-09-15	Human	Human	Age: 20-29; stool	2016	8			North America	United States							Javiana (Predicted)					Centers for Disease Control and Prevention Enteric Diseases Laboratory Branch		Javiana	D1	l,z28	1,5	Javiana	9	l,z28	1,5	24	17	Javiana	Lineage 3		13	12	17	16	13
SAL_GA9284AA	2016K-0782	SAL_GA9284AA	SAL_MA7770AA_AS	PRJNA230403	SRP040281	SAMN05773410	SRS1692833	2016-09-16	2016-09-15	Human	Human	Age: 40-49; stool	2016	8			North America	United States							Javiana (Predicted)					Centers for Disease Control and Prevention Enteric Diseases Laboratory Branch		Javiana	D1	l,z28	1,5	Javiana	9	l,z28	1,5	24	17	Javiana	Lineage 3		13	12	17	16	13
SAL_GA9285AA	2016K-0779	SAL_GA9285AA	SAL_MA7769AA_AS	PRJNA230403	SRP040281	SAMN05773411	SRS1692832	2016-09-16	2016-09-15	Human	Human	Age: 70-79; stool	2016	8			North America	United States							Javiana (Predicted)					Centers for Disease Control and Prevention Enteric Diseases Laboratory Branch		Javiana	D1	l,z28	1,5	Javiana	9	l,z28	1,5	24	17	Javiana	Lineage 3		13	12	17	16	13
SAL_GA9286AA	2016K-0783	SAL_GA9286AA	SAL_MA7768AA_AS	PRJNA230403	SRP040281	SAMN05773412	SRS1692831	2016-09-16	2016-09-15	Human	Human	Age: 70-79; stool	2016	8			North America	United States							Javiana (Predicted)					Centers for Disease Control and Prevention Enteric Diseases Laboratory Branch		Javiana	D1	l,z28	1,5	Javiana	9	l,z28	1,5	24	17	Javiana	Lineage 3		13	12	17	16	13
SAL_GA9384AA	PNUSAS003633	SAL_GA9384AA	SAL_MA8004AA_AS	PRJNA230403	SRP040281	SAMN05713996	SRS1704636	2016-09-21	2016-09-20	Human	Human	Age: 60-69; stool	2016	7			North America	United States							Javiana					PulseNet Next Generation Subtyping Methods Unit		Javiana	D1	l,z28	1,5	Javiana	9	l,z28	1,5	24	17	Javiana	Lineage 3		13	12	17	16	13
SAL_GA9400AA	PNUSAS003700	SAL_GA9400AA	SAL_MA7988AA_AS	PRJNA230403	SRP040281	SAMN05714020	SRS1704619	2016-09-21	2016-09-20	Human	Human	Age: 60-69; stool	2016	7			North America	United States							Javiana					PulseNet Next Generation Subtyping Methods Unit		Javiana	D1	l,z28	1,5	Javiana	9	l,z28	1,5	24	17	Javiana	Lineage 3		13	12	17	16	13
SAL_GA9405AA	PNUSAS003695	SAL_GA9405AA	SAL_MA7983AA_AS	PRJNA230403	SRP040281	SAMN05714015	SRS1704615	2016-09-21	2016-09-20	Human	Human	Age: 5-9; stool	2016	7			North America	United States							Javiana					PulseNet Next Generation Subtyping Methods Unit		Javiana	D1	l,z28	1,5	Javiana	9	l,z28	1,5	24	17	Javiana	Lineage 3		13	12	17	16	13
SAL_GA9431AA	2016K-0778	SAL_GA9431AA	SAL_MA7957AA_AS	PRJNA230403	SRP040281	SAMN05791617	SRS1704587	2016-09-21	2016-09-20	Human	Human	Age: 40-49; stool	2016	8			North America	United States							Javiana (Predicted)					Centers for Disease Control and Prevention Enteric Diseases Laboratory Branch		Javiana	D1	l,z28	1,5	Javiana	9	l,z28	1,5	24	17	Javiana	Lineage 3		13	12	17	16	13
SAL_GA9433AA	AZ-TG93545	SAL_GA9433AA	SAL_MA7955AA_AS	PRJNA183847	SRP028894	SAMN05781383	SRS1704328	2016-09-21	2015-01-01	Human	Human	Homo sapiens; human	2016				North America	United States	Arizona						Javiana					FDA Center for Food Safety and Applied Nutrition		Javiana	D1	l,z28	1,5	Javiana	9	l,z28	1,5	24	17	Javiana	Lineage 3		13	12	17	16	13
SAL_GA9434AA	AZ-TG93549	SAL_GA9434AA	SAL_MA7954AA_AS	PRJNA183847	SRP028894	SAMN05781382	SRS1704327	2016-09-21	2015-01-01	Human	Human	Homo sapiens; human	2016				North America	United States	Arizona						Javiana					FDA Center for Food Safety and Applied Nutrition		Javiana	D1	l,z28	1,5	Javiana	9	l,z28	1,5	24	17	Javiana	Lineage 3		13	12	17	16	13
SAL_GA9435AA	AZ-TG93553	SAL_GA9435AA	SAL_MA7953AA_AS	PRJNA183847	SRP028894	SAMN05781381	SRS1704326	2016-09-21	2015-01-01	Human	Human	Homo sapiens; human	2016				North America	United States	Arizona						Javiana					FDA Center for Food Safety and Applied Nutrition		Javiana	D1	l,z28	1,5	Javiana	9	l,z28	1,5	24	17	Javiana	Lineage 3		13	12	17	16	13
SAL_GA9436AA	AZ-TG93557	SAL_GA9436AA	SAL_MA7952AA_AS	PRJNA183847	SRP028894	SAMN05781380	SRS1704325	2016-09-21	2015-01-01	Human	Human	Homo sapiens; human	2016				North America	United States	Arizona						Javiana					FDA Center for Food Safety and Applied Nutrition		Javiana	D1	l,z28	1,5	Javiana	9	l,z28	1,5	24	17	Javiana	Lineage 3		13	12	17	16	13
SAL_GA9437AA	AZ-TG93561	SAL_GA9437AA	SAL_MA7951AA_AS	PRJNA183847	SRP028894	SAMN05781379	SRS1704324	2016-09-21	2015-01-01	Human	Human	Homo sapiens; human	2016				North America	United States	Arizona						Javiana					FDA Center for Food Safety and Applied Nutrition		Javiana	D1	l,z28	1,5	Javiana	9	l,z28	1,5	24	17	Javiana	Lineage 3		13	12	17	16	13
SAL_GA9438AA	AZ-TG93565	SAL_GA9438AA	SAL_MA7950AA_AS	PRJNA183847	SRP028894	SAMN05781378	SRS1704323	2016-09-21	2015-01-01	Human	Human	Homo sapiens; human	2016				North America	United States	Arizona						Javiana					FDA Center for Food Safety and Applied Nutrition		Javiana	D1	l,z28	1,5	Javiana	9	l,z28	1,5	24	17	Javiana	Lineage 3		13	12	17	16	13
SAL_GA9439AA	AZ-TG93569	SAL_GA9439AA	SAL_MA7949AA_AS	PRJNA183847	SRP028894	SAMN05781377	SRS1704322	2016-09-21	2015-01-01	Human	Human	Homo sapiens; human	2016				North America	United States	Arizona						Javiana					FDA Center for Food Safety and Applied Nutrition		Javiana	D1	l,z28	1,5	Javiana	9	l,z28	1,5	24	17	Javiana	Lineage 3		13	12	17	16	13
SAL_GA9440AA	AZ-TG93573	SAL_GA9440AA	SAL_MA7948AA_AS	PRJNA183847	SRP028894	SAMN05781376	SRS1704321	2016-09-21	2015-01-01	Human	Human	Homo sapiens; human	2016				North America	United States	Arizona						Javiana					FDA Center for Food Safety and Applied Nutrition		Javiana	D1	l,z28	1,5	Javiana	9	l,z28	1,5	24	17	Javiana	Lineage 3		13	12	17	16	13
SAL_GA9441AA	AZ-TG93577	SAL_GA9441AA	SAL_MA7947AA_AS	PRJNA183847	SRP028894	SAMN05781375	SRS1704320	2016-09-21	2015-01-01	Human	Human	Homo sapiens; human	2016				North America	United States	Arizona						Javiana					FDA Center for Food Safety and Applied Nutrition		Javiana	D1	l,z28	1,5	Javiana	9	l,z28	1,5	24	17	Javiana	Lineage 3		13	12	17	16	13
SAL_GA9442AA	AZ-TG93581	SAL_GA9442AA	SAL_MA7946AA_AS	PRJNA183847	SRP028894	SAMN05781374	SRS1704319	2016-09-21	2015-01-01	Human	Human	Homo sapiens; human	2016				North America	United States	Arizona						Javiana					FDA Center for Food Safety and Applied Nutrition		Javiana	D1	l,z28	1,5	Javiana	9	l,z28	1,5	24	17	Javiana	Lineage 3		13	12	17	16	13
SAL_GA9443AA	AZ-TG93585	SAL_GA9443AA	SAL_MA7945AA_AS	PRJNA183847	SRP028894	SAMN05781373	SRS1704318	2016-09-21	2015-01-01	ND	ND/Others	Freezer Door	2016	8			North America	United States	Arizona						Javiana					FDA Center for Food Safety and Applied Nutrition		Javiana	D1	l,z28	1,5	Javiana	9	l,z28	1,5	24	17	Javiana	Lineage 3		13	12	17	16	13
SAL_GA9444AA	AZ-TG93589	SAL_GA9444AA	SAL_MA7944AA_AS	PRJNA183847	SRP028894	SAMN05781372	SRS1704317	2016-09-21	2015-01-01	Aquatic Animal	Shellfish	Halibut, Re-packaged in the restaurant	2016	8			North America	United States	Arizona						Javiana					FDA Center for Food Safety and Applied Nutrition		Javiana	D1	l,z28	1,5	Javiana	9	l,z28	1,5	24	17	Javiana	Lineage 3		13	12	17	16	13
SAL_GA9446AA	AZ-TG93597	SAL_GA9446AA	SAL_MA7942AA_AS	PRJNA183847	SRP028894	SAMN05781370	SRS1704315	2016-09-21	2015-01-01	Aquatic Animal	Shellfish	Shrimp 31-35 bagged, Re-packaged in the restaurant	2016	9			North America	United States	Arizona						Javiana					FDA Center for Food Safety and Applied Nutrition		Javiana	D1	l,z28	1,5	Javiana	9	l,z28	1,5	24	17	Javiana	Lineage 3		13	12	17	16	13
SAL_GA9447AA	AZ-TG93601	SAL_GA9447AA	SAL_MA7941AA_AS	PRJNA183847	SRP028894	SAMN05781369	SRS1704314	2016-09-21	2015-01-01	Aquatic Animal	Shellfish	Shrimp U10 skewered, Re-packaged in the restaurant	2016	9			North America	United States	Arizona						Javiana					FDA Center for Food Safety and Applied Nutrition		Javiana	D1	l,z28	1,5	Javiana	9	l,z28	1,5	24	17	Javiana	Lineage 3		13	12	17	16	13
SAL_GA9448AA	AZ-TG93605	SAL_GA9448AA	SAL_MA7940AA_AS	PRJNA183847	SRP028894	SAMN05781368	SRS1704313	2016-09-21	2015-01-01	Aquatic Animal	Shellfish	Shrimp 31-35 skewered, Re-packaged in the restaurant	2016	9			North America	United States	Arizona						Javiana					FDA Center for Food Safety and Applied Nutrition		Javiana	D1	l,z28	1,5	Javiana	9	l,z28	1,5	24	17	Javiana	Lineage 3		13	12	17	16	13
SAL_GA9449AA	AZ-TG93609	SAL_GA9449AA	SAL_MA7939AA_AS	PRJNA183847	SRP028894	SAMN05781367	SRS1704312	2016-09-21	2015-01-01	Aquatic Animal	Shellfish	Shrimp 26-30 bagged, Re-packaged in the restaurant	2016	9			North America	United States	Arizona						Javiana					FDA Center for Food Safety and Applied Nutrition		Javiana	D1	l,z28	1,5	Javiana	9	l,z28	1,5	24	17	Javiana	Lineage 3		13	12	17	16	13
SAL_GA9450AA	AZ-TG93613	SAL_GA9450AA	SAL_MA7938AA_AS	PRJNA183847	SRP028894	SAMN05781366	SRS1704311	2016-09-21	2015-01-01	Aquatic Animal	Shellfish	Shrimp 16-20 bacon wrapped, Re-packaged in the restaurant	2016	9			North America	United States	Arizona						Javiana					FDA Center for Food Safety and Applied Nutrition		Javiana	D1	l,z28	1,5	Javiana	9	l,z28	1,5	24	17	Javiana	Lineage 3		13	12	17	16	13
SAL_GA9716AA	CFSAN035884	SAL_GA9716AA	SAL_NA3308AA_AS	PRJNA186035	SRP018785	SAMN03861774	SRS1711055	2016-09-24	2015-01-01	Environment	Water/River	water	2015	4			North America	United States	Virginia						Javiana (Predicted)					FDA Center for Food Safety and Applied Nutrition		Javiana	D1	l,z28	1,5	Javiana	9	l,z28	1,5	24	17	Javiana	Lineage 3		13	12	17	16	13
SAL_GA9717AA	CFSAN035883	SAL_GA9717AA	SAL_NA3307AA_AS	PRJNA186035	SRP018785	SAMN03861773	SRS1711053	2016-09-24	2015-01-01	Environment	Water/River	water	2015	4			North America	United States	Virginia						Javiana (Predicted)					FDA Center for Food Safety and Applied Nutrition		Javiana	D1	l,z28	1,5	Javiana	9	l,z28	1,5	24	17	Javiana	Lineage 3		13	12	17	16	13
SAL_GA9721AA	CFSAN035879	SAL_GA9721AA	SAL_MA8764AA_AS	PRJNA186035	SRP018785	SAMN03861769	SRS1711049	2016-09-24	2015-01-01	Environment	Water/River	water	2015	4			North America	United States	Virginia						Javiana (Predicted)					FDA Center for Food Safety and Applied Nutrition		Javiana	D1	l,z28	1,5	Javiana	9	l,z28	1,5	24	17	Javiana	Lineage 3		13	12	17	16	13
SAL_GA9722AA	CFSAN035878	SAL_GA9722AA	SAL_MA8664AA_AS	PRJNA186035	SRP018785	SAMN03861768	SRS1711050	2016-09-24	2015-01-01	Environment	Water/River	water	2015	4			North America	United States	Virginia						Javiana (Predicted)					FDA Center for Food Safety and Applied Nutrition		Javiana	D1	l,z28	1,5	Javiana	9	l,z28	1,5	24	17	Javiana	Lineage 3		13	12	17	16	13
SAL_GA9723AA	CFSAN035877	SAL_GA9723AA	SAL_NA3306AA_AS	PRJNA186035	SRP018785	SAMN03861767	SRS1711048	2016-09-24	2015-01-01	Environment	Water/River	water	2015	4			North America	United States	Virginia						Javiana (Predicted)					FDA Center for Food Safety and Applied Nutrition		Javiana	D1	l,z28	1,5	Javiana	9	l,z28	1,5	24	17	Javiana	Lineage 3		13	12	17	16	13
SAL_GA9724AA	CFSAN035876	SAL_GA9724AA	SAL_MA8700AA_AS	PRJNA186035	SRP018785	SAMN03861766	SRS1711047	2016-09-24	2015-01-01	Environment	Water/River	water	2015	4			North America	United States	Virginia						Javiana (Predicted)					FDA Center for Food Safety and Applied Nutrition		Javiana	D1	l,z28	1,5	Javiana	9	l,z28	1,5	24	17	Javiana	Lineage 3		13	12	17	16	13
SAL_GA9725AA	CFSAN035875	SAL_GA9725AA	SAL_MA8810AA_AS	PRJNA186035	SRP018785	SAMN03861765	SRS1711046	2016-09-24	2015-01-01	Environment	Water/River	water	2015	4			North America	United States	Virginia						Javiana (Predicted)					FDA Center for Food Safety and Applied Nutrition		Javiana	D1	l,z28	1,5	Javiana	9	l,z28	1,5	24	17	Javiana	Lineage 3		13	12	17	16	13
SAL_GA9726AA	CFSAN035874	SAL_GA9726AA	SAL_MA8660AA_AS	PRJNA186035	SRP018785	SAMN03861764	SRS1711045	2016-09-24	2015-01-01	Environment	Water/River	water	2015	4			North America	United States	Virginia						Javiana (Predicted)					FDA Center for Food Safety and Applied Nutrition		Javiana	D1	l,z28	1,5	Javiana	9	l,z28	1,5	24	17	Javiana	Lineage 3		13	12	17	16	13
SAL_GA9727AA	CFSAN035873	SAL_GA9727AA	SAL_MA8856AA_AS	PRJNA186035	SRP018785	SAMN03861763	SRS1711044	2016-09-24	2015-01-01	Environment	Water/River	water	2015	4			North America	United States	Virginia						Javiana (Predicted)					FDA Center for Food Safety and Applied Nutrition		Javiana	D1	l,z28	1,5	Javiana	9	l,z28	1,5	24	17	Javiana	Lineage 3		13	12	17	16	13
SAL_GA9728AA	CFSAN035872	SAL_GA9728AA	SAL_MA8697AA_AS	PRJNA186035	SRP018785	SAMN03861762	SRS1711043	2016-09-24	2015-01-01	Environment	Water/River	water	2015	4			North America	United States	Virginia						Javiana (Predicted)					FDA Center for Food Safety and Applied Nutrition		Javiana	D1	l,z28	1,5	Javiana	9	l,z28	1,5	24	17	Javiana	Lineage 3		13	12	17	16	13
SAL_GA9809AA	PNUSAS003736	SAL_GA9809AA	SAL_NA3280AA_AS	PRJNA230403	SRP040281	SAMN05763129	SRS1710336	2016-09-24	2016-09-22	Human	Human	Homo sapiens; Age: 0-4; stool	2016	8			North America	United States							Typhimurium					PulseNet Next Generation Subtyping Methods Unit		Javiana	D1	l,z28	1,5	Javiana	9	l,z28	1,5	24	17	Javiana	Lineage 3		13	12	17	16	13
SAL_GA9815AA	PNUSAS003966	SAL_GA9815AA	SAL_MA8336AA_AS	PRJNA230403	SRP040281	SAMN05781450	SRS1710330	2016-09-24	2016-09-22	Human	Human	Age: 0-4; stool	2016	8			North America	United States							Javiana					PulseNet Next Generation Subtyping Methods Unit		Javiana	D1	l,z28	1,5	Javiana	9	l,z28	1,5	24	17	Javiana	Lineage 3		13	12	17	16	13
SAL_GA9820AA	PNUSAS003962	SAL_GA9820AA	SAL_MA8370AA_AS	PRJNA230403	SRP040281	SAMN05781445	SRS1709992	2016-09-24	2016-09-22	Human	Human	Age: 20-29; stool	2016	8			North America	United States							Javiana (Predicted)					PulseNet Next Generation Subtyping Methods Unit		Javiana	D1	l,z28	1,5	Javiana	9	l,z28	1,5	24	17	Javiana	Lineage 3		13	12	17	16	13
SAL_GA9965AA	PNUSAS004072	SAL_GA9965AA	SAL_MA9375AA_AS	PRJNA230403	SRP040281	SAMN05788696	SRS1713052	2016-09-27	2016-09-26	Human	Human	Age: 5-9; stool	2016	8			North America	United States							Javiana					PulseNet Next Generation Subtyping Methods Unit		Javiana	D1	l,z28	1,5	Javiana	9	l,z28	1,5	24	17	Javiana	Lineage 3		13	12	17	16	13
SAL_GA9973AA	PNUSAS004064	SAL_GA9973AA	SAL_MA9552AA_AS	PRJNA230403	SRP040281	SAMN05788688	SRS1713044	2016-09-27	2016-09-26	Human	Human	Age: 60-69; stool	2016	8			North America	United States							Javiana					PulseNet Next Generation Subtyping Methods Unit		Javiana	D1	l,z28	1,5	Javiana	9	l,z28	1,5	24	17	Javiana	Lineage 3		13	12	17	16	13
SAL_GA9975AA	PNUSAS003977	SAL_GA9975AA	SAL_MA9523AA_AS	PRJNA230403	SRP040281	SAMN05784341	SRS1713042	2016-09-27	2016-09-26	Human	Human	Age: 60-69; stool	2016	8			North America	United States							Javiana					PulseNet Next Generation Subtyping Methods Unit		Javiana	D1	l,z28	1,5	Javiana	9	l,z28	1,5	24	17	Javiana	Lineage 3		13	12	17	16	13
SAL_GA9978AA	PNUSAS003974	SAL_GA9978AA	SAL_MA9549AA_AS	PRJNA230403	SRP040281	SAMN05781455	SRS1713039	2016-09-27	2016-09-26	Human	Human	Age: 30-39; stool	2016	8			North America	United States							Javiana (Predicted)					PulseNet Next Generation Subtyping Methods Unit		Javiana	D1	l,z28	1,5	Javiana	9	l,z28	1,5	24	17	Javiana	Lineage 3		13	12	17	16	13
SAL_HA0030AA	2016K-0781	SAL_HA0030AA	SAL_NA3219AA_AS	PRJNA230403	SRP040281	SAMN05824133	SRS1712790	2016-09-27	2016-09-26	Human	Human	Age: 20-29; stool	2016	8			North America	United States							Javiana (Predicted)					Centers for Disease Control and Prevention Enteric Diseases Laboratory Branch		Javiana	D1	l,z28	1,5	Javiana	9	l,z28	1,5	24	17	Javiana	Lineage 3		13	12	17	16	13
SAL_HA0067AA	PNUSAS004196	SAL_HA0067AA	SAL_MA9887AA_AS	PRJNA230403	SRP040281	SAMN05819021	SRS1714344	2016-09-28	2016-09-27	Human	Human	Age: 50-59; stool	2016	3			North America	United States	Wyoming						Enteritidis					PulseNet Next Generation Subtyping Methods Unit		Javiana	D1	l,z28	1,5	Javiana	9	l,z28	1,5	24	17	Javiana	Lineage 3		13	12	17	16	13
SAL_HA0083AA	PNUSAS003778	SAL_HA0083AA	SAL_MA9889AA_AS	PRJNA230403	SRP040281	SAMN05762804	SRS1714328	2016-09-28	2016-09-27	Human	Human	Age: 10-19; stool	2016	8			North America	United States							Javiana					PulseNet Next Generation Subtyping Methods Unit		Javiana	D1	l,z28	1,5	Javiana	9	l,z28	1,5	24	17	Javiana	Lineage 3		13	12	17	16	13
SAL_HA0088AA	PNUSAS003773	SAL_HA0088AA	SAL_MA9877AA_AS	PRJNA230403	SRP040281	SAMN05762799	SRS1714323	2016-09-28	2016-09-27	Human	Human	Age: 20-29; stool	2016	8			North America	United States							Javiana					PulseNet Next Generation Subtyping Methods Unit		Javiana	D1	l,z28	1,5	Javiana	9	l,z28	1,5	24	17	Javiana	Lineage 3		13	12	17	16	13
SAL_HA0263AA	PNUSAS004085	SAL_HA0263AA	SAL_NA0186AA_AS	PRJNA230403	SRP040281	SAMN05851815	SRS1727290	2016-10-07	2016-10-04	Human	Human	Age: 40-49; stool	2016	9			North America	United States							Javiana					PulseNet Next Generation Subtyping Methods Unit		Javiana	D1	l,z28	1,5	Javiana	9	l,z28	1,5	24	17	Javiana	Lineage 3		13	12	17	16	13
SAL_HA0264AA	PNUSAS004084	SAL_HA0264AA	SAL_NA0185AA_AS	PRJNA230403	SRP040281	SAMN05851814	SRS1727289	2016-10-07	2016-10-04	Human	Human	Age: 40-49; stool	2016	8			North America	United States							Javiana					PulseNet Next Generation Subtyping Methods Unit		Javiana	D1	l,z28	1,5	Javiana	9	l,z28	1,5	24	17	Javiana	Lineage 3		13	12	17	16	13
SAL_HA0269AA	PNUSAS004079	SAL_HA0269AA	SAL_NA0153AA_AS	PRJNA230403	SRP040281	SAMN05851809	SRS1727284	2016-10-07	2016-10-04	Human	Human	Age: 20-29; stool	2016	8			North America	United States							Javiana					PulseNet Next Generation Subtyping Methods Unit		Javiana	D1	l,z28	1,5	Javiana	9	l,z28	1,5	24	17	Javiana	Lineage 3		13	12	17	16	13
SAL_HA0303AA	PNUSAS003720	SAL_HA0303AA	SAL_NA0101AA_AS	PRJNA230403	SRP040281	SAMN05853974	SRS1727250	2016-10-07	2016-10-04	Human	Human	Age: 50-59; stool	2016	8			North America	United States							Muenchen					PulseNet Next Generation Subtyping Methods Unit		Javiana	D1	l,z28	1,5	Javiana	9	l,z28	1,5	24	17	Javiana	Lineage 3		13	12	17	16	13
SAL_HA0339AA	PNUSAS004321	SAL_HA0339AA	SAL_NA0065AA_AS	PRJNA230403	SRP040281	SAMN05833230	SRS1727212	2016-10-07	2016-10-04	Human	Human	Age: 5-9; stool	2016	8			North America	United States							Javiana					PulseNet Next Generation Subtyping Methods Unit		Javiana	B	l,z28	1,5	Javiana	9	l,z28	1,5	24	17	Javiana	Lineage 3		13	12	17	16	13
SAL_HA0429AA	PNUSAS003801	SAL_HA0429AA	SAL_NA0581AA_AS	PRJNA230403	SRP040281	SAMN05869271	SRS1738671	2016-10-12	2016-10-11	Human	Human	Age: 5-9	2016	1			North America	United States							Javiana (Predicted)					PulseNet Next Generation Subtyping Methods Unit		Javiana	D1	l,z28	1,5	Javiana	9	l,z28	1,5	24	17	Javiana	Lineage 3		13	12	17	16	13
SAL_HA0484AA	PNUSAS004272	SAL_HA0484AA	SAL_NA0454AA_AS	PRJNA230403	SRP040281	SAMN05860968	SRS1738207	2016-10-12	2016-10-11	Human	Human	Homo sapiens; Age: 0-4; stool	2016	9			North America	United States							Javiana (Predicted)					PulseNet Next Generation Subtyping Methods Unit		Javiana	D1	l,z28	1,5	Javiana	9	l,z28	1,5	24	17	Javiana	Lineage 3		13	12	17	16	13
SAL_HA0485AA	PNUSAS004233	SAL_HA0485AA	SAL_NA0453AA_AS	PRJNA230403	SRP040281	SAMN05859366	SRS1738206	2016-10-12	2016-10-11	Human	Human	Age: 80-89; stool	2016	8			North America	United States							Javiana (Predicted)					PulseNet Next Generation Subtyping Methods Unit		Javiana	D1	l,z28	1,5	Javiana	9	l,z28	1,5	24	17	Javiana	Lineage 3		13	12	17	16	13
SAL_HA0486AA	PNUSAS004232	SAL_HA0486AA	SAL_NA0452AA_AS	PRJNA230403	SRP040281	SAMN05859365	SRS1738205	2016-10-12	2016-10-11	Human	Human	Age: 60-69; stool	2016	8			North America	United States							Javiana					PulseNet Next Generation Subtyping Methods Unit		Javiana	D1	l,z28	1,5	Javiana	9	l,z28	1,5	24	17	Javiana	Lineage 3		13	12	17	16	13
SAL_HA0499AA	PNUSAS004230	SAL_HA0499AA	SAL_NA0439AA_AS	PRJNA230403	SRP040281	SAMN05859316	SRS1738191	2016-10-12	2016-10-11								North America	United States							Javiana (Predicted)					Pulsenet		Javiana	D1	l,z28	1,5	Javiana	9	l,z28	1,5	24	17	Javiana	Lineage 3		13	12	17	16	13
SAL_HA0567AA	PNUSAS004458	SAL_HA0567AA	SAL_NA1509AA_AS	PRJNA230403	SRP040281	SAMN05879151	SRS1744435	2016-10-14	2016-10-13	Human	Human	Age: 0-4; stool	2016	8			North America	United States							Javiana (Predicted)					PulseNet Next Generation Subtyping Methods Unit		Javiana	D1	l,z28	1,5	Javiana	9	l,z28	1,5	24	17	Javiana	Lineage 3		13	12	17	16	13
SAL_HA0581AA	PNUSAS004460	SAL_HA0581AA	SAL_NA1500AA_AS	PRJNA230403	SRP040281	SAMN05879153	SRS1744370	2016-10-14	2016-10-13	Human	Human	Age: 80-89; stool	2016	8			North America	United States							Javiana (Predicted)					PulseNet Next Generation Subtyping Methods Unit		Javiana	D1	l,z28	1,5	Javiana	9	l,z28	1,5	24	17	Javiana	Lineage 3		13	12	17	16	13
SAL_HA0610AA	2014AM-1834	SAL_HA0610AA	SAL_NA1363AA_AS	PRJNA287785	SRP082403	SAMN05907754	SRS1744270	2016-10-14	2016-10-13	Human	Human	Age: 40-49; stool	2014	8			North America	United States							Javiana (Predicted)					Centers for Disease Control and Prevention Enteric Diseases Laboratory Branch		Javiana	D1	l,z28	1,5	Javiana	9	l,z28	1,5	24	17	Javiana	Lineage 3		13	12	17	16	13
SAL_HA0662AA	2014AM-1023	SAL_HA0662AA	SAL_NA1214AA_AS	PRJNA287785	SRP082403	SAMN05907703	SRS1744175	2016-10-14	2016-10-13	Human	Human	Age: 50-59; stool	2014	9			North America	United States							Javiana (Predicted)					Centers for Disease Control and Prevention Enteric Diseases Laboratory Branch		Javiana	D1	l,z28	1,5	Javiana	9	l,z28	1,5	24	17	Javiana	Lineage 3		13	12	17	16	13
SAL_HA0746AA	PNUSAS004448	SAL_HA0746AA	SAL_NA1120AA_AS	PRJNA230403	SRP040281	SAMN05868016	SRS1742394	2016-10-14	2016-10-12	Human	Human	Age: 0-4; stool	2016	6			North America	United States							Javiana					Pulsenet		Javiana	D1	l,z28	1,5	Javiana	9	l,z28	1,5	24	17	Javiana	Lineage 3		13	12	17	16	13
SAL_HA0760AA	PNUSAS004432	SAL_HA0760AA	SAL_NA1036AA_AS	PRJNA230403	SRP040281	SAMN05879412	SRS1742380	2016-10-14	2016-10-12	Human	Human	Age: 60-69; stool	2016	7			North America	United States							Javiana					PulseNet Next Generation Subtyping Methods Unit		Javiana	D1	l,z28	1,5		-	l,z28	1,5	24	17	Javiana	Lineage 3		13	12	17	16	13
SAL_HA0879AA	PNUSAS004295	SAL_HA0879AA	SAL_NA0775AA_AS	PRJNA230403	SRP040281	SAMN05859598	SRS1738806	2016-10-14	2016-10-11	Human	Human	Age: 80-89; stool	2016	8			North America	United States							Javiana					Center for Diease Control and Prevention - Enteric Diseases Laboratory Branch (US)		Javiana	D1	l,z28	1,5	Javiana	9	l,z28	1,5	24	17	Javiana	Lineage 3		13	12	17	16	13
SAL_HA0890AA	PNUSAS004255	SAL_HA0890AA	SAL_NA0726AA_AS	PRJNA230403	SRP040281	SAMN05851351	SRS1738722	2016-10-14	2016-10-11	Human	Human	Age: 20-29; stool	2016	8			North America	United States							Javiana					PulseNet Next Generation Subtyping Methods Unit		Javiana	D1	l,z28	1,5	Javiana	9	l,z28	1,5	24	17	Javiana	Lineage 3		13	12	17	16	13
SAL_HA0892AA	PNUSAS004253	SAL_HA0892AA	SAL_NA0769AA_AS	PRJNA230403	SRP040281	SAMN05851349	SRS1738720	2016-10-14	2016-10-11	Human	Human	Age: 0-4; stool	2016	8			North America	United States							Enteritidis					PulseNet Next Generation Subtyping Methods Unit		Javiana	D1	l,z28	1,5	Javiana	9	l,z28	1,5	24	17	Javiana	Lineage 3		13	12	17	16	13
SAL_HA0893AA	PNUSAS004252	SAL_HA0893AA	SAL_NA0723AA_AS	PRJNA230403	SRP040281	SAMN05851348	SRS1738719	2016-10-14	2016-10-11	Human	Human	Age: 60-69; stool	2016	8			North America	United States							Javiana					PulseNet Next Generation Subtyping Methods Unit		Javiana	D1	l,z28	1,5	Javiana	9	l,z28	1,5	24	17	Javiana	Lineage 3		13	12	17	16	13
SAL_HA0896AA	PNUSAS004249	SAL_HA0896AA	SAL_NA0720AA_AS	PRJNA230403	SRP040281	SAMN05851368	SRS1738716	2016-10-14	2016-10-11	Human	Human	Age: 60-69; stool	2016	8			North America	United States							Javiana (Predicted)					Center for Diease Control and Prevention - Enteric Diseases Laboratory Branch (US)		Javiana	D1	l,z28	1,5	Javiana	9	l,z28	1,5	24	17	Javiana	Lineage 3		13	12	17	16	13
SAL_HA0897AA	PNUSAS004248	SAL_HA0897AA	SAL_NA0719AA_AS	PRJNA230403	SRP040281	SAMN05851367	SRS1738715	2016-10-14	2016-10-11	Human	Human	Age: 10-19; stool	2016	8			North America	United States							Javiana					PulseNet Next Generation Subtyping Methods Unit		Javiana	D1	l,z28	1,5	Javiana	9	l,z28	1,5	24	17	Javiana	Lineage 3		13	12	17	16	13
SAL_HA0900AA	PNUSAS004245	SAL_HA0900AA	SAL_NA0676AA_AS	PRJNA230403	SRP040281	SAMN05851342	SRS1738712	2016-10-14	2016-10-11	Human	Human	Age: 50-59; stool	2016	8			North America	United States							Javiana					PulseNet Next Generation Subtyping Methods Unit		Javiana	D1	l,z28	1,5	Javiana	9	l,z28	1,5	24	17	Javiana	Lineage 3		13	12	17	16	13
SAL_HA0905AA	PNUSAS004293	SAL_HA0905AA	SAL_NA0671AA_AS	PRJNA230403	SRP040281	SAMN05859596	SRS1738707	2016-10-14	2016-10-11	Human	Human	Age: 5-9; stool	2016	8			North America	United States							Javiana (Predicted)					Center for Diease Control and Prevention - Enteric Diseases Laboratory Branch (US)		Javiana	D1	l,z28	1,5	Javiana	9	l,z28	1,5	24	17	Javiana	Lineage 3		13	12	17	16	13
SAL_HA0912AA	PNUSAS004266	SAL_HA0912AA	SAL_NA0646AA_AS	PRJNA230403	SRP040281	SAMN05851361	SRS1738700	2016-10-14	2016-10-11	Human	Human	Age: 5-9; urine	2016	8			North America	United States							Javiana (Predicted)					Center for Diease Control and Prevention - Enteric Diseases Laboratory Branch (US)		Javiana	D1	l,z28	1,5	Javiana	9	l,z28	1,5	24	17	Javiana	Lineage 3		13	12	17	16	13
SAL_HA0913AA	PNUSAS004362	SAL_HA0913AA	SAL_NA0645AA_AS	PRJNA230403	SRP040281	SAMN05856063	SRS1738699	2016-10-14	2016-10-11								North America	United States							Javiana (Predicted)					PulseNet Next Generation Subtyping Methods Unit		Javiana	D1	l,z28	1,5	Javiana	9	l,z28	1,5	24	17	Javiana	Lineage 3		13	12	17	16	13
SAL_HA0914AA	PNUSAS004361	SAL_HA0914AA	SAL_NA0644AA_AS	PRJNA230403	SRP040281	SAMN05856062	SRS1738698	2016-10-14	2016-10-11								North America	United States							Javiana (Predicted)					Center for Diease Control and Prevention - Enteric Diseases Laboratory Branch (US)		Javiana	D1	l,z28	1,5	Javiana	9	l,z28	1,5	24	17	Javiana	Lineage 3		13	12	17	16	13
SAL_HA0915AA	PNUSAS004360	SAL_HA0915AA	SAL_NA0643AA_AS	PRJNA230403	SRP040281	SAMN05856064	SRS1738697	2016-10-14	2016-10-11								North America	United States							Javiana (Predicted)					Center for Diease Control and Prevention - Enteric Diseases Laboratory Branch (US)		Javiana	D1	l,z28	1,5	Javiana	9	l,z28	1,5	24	17	Javiana	Lineage 3		13	12	17	16	13
SAL_HA0916AA	PNUSAS004229	SAL_HA0916AA	SAL_NA0642AA_AS	PRJNA230403	SRP040281	SAMN05856061	SRS1738696	2016-10-14	2016-10-11								North America	United States							Javiana (Predicted)					PulseNet Next Generation Subtyping Methods Unit		Javiana	D1	l,z28	1,5	Javiana	9	l,z28	1,5	24	17	Javiana	Lineage 3		13	12	17	16	13
SAL_HA0918AA	PNUSAS004228	SAL_HA0918AA	SAL_NA0640AA_AS	PRJNA230403	SRP040281	SAMN05856060	SRS1738694	2016-10-14	2016-10-11								North America	United States							Javiana (Predicted)					Center for Diease Control and Prevention - Enteric Diseases Laboratory Branch (US)		Javiana	D1	l,z28	1,5	Javiana	9	l,z28	1,5	24	17	Javiana	Lineage 3		13	12	17	16	13
SAL_HA0919AA	PNUSAS004227	SAL_HA0919AA	SAL_NA0639AA_AS	PRJNA230403	SRP040281	SAMN05856059	SRS1738692	2016-10-14	2016-10-11								North America	United States							Javiana (Predicted)					Center for Diease Control and Prevention - Enteric Diseases Laboratory Branch (US)		Javiana	D1	l,z28	1,5	Javiana	9	l,z28	1,5	24	17	Javiana	Lineage 3		13	12	17	16	13
SAL_HA0920AA	PNUSAS004226	SAL_HA0920AA	SAL_NA0670AA_AS	PRJNA230403	SRP040281	SAMN05856058	SRS1738693	2016-10-14	2016-10-11								North America	United States							Javiana (Predicted)					Center for Diease Control and Prevention - Enteric Diseases Laboratory Branch (US)		Javiana	D1	l,z28	1,5	Javiana	9	l,z28	1,5	24	17	Javiana	Lineage 3		13	12	17	16	13
SAL_HA0921AA	PNUSAS004358	SAL_HA0921AA	SAL_NA0637AA_AS	PRJNA230403	SRP040281	SAMN05856065	SRS1738691	2016-10-14	2016-10-11								North America	United States							Javiana (Predicted)					Center for Diease Control and Prevention - Enteric Diseases Laboratory Branch (US)		Javiana	D1	l,z28	1,5	Javiana	9	l,z28	1,5	24	17	Javiana	Lineage 3		13	12	17	16	13
SAL_HA0923AA	PNUSAS004356	SAL_HA0923AA	SAL_NA0635AA_AS	PRJNA230403	SRP040281	SAMN05856055	SRS1738689	2016-10-14	2016-10-11								North America	United States							Javiana (Predicted)					PulseNet Next Generation Subtyping Methods Unit		Javiana	D1	l,z28	1,5	Javiana	9	l,z28	1,5	24	17	Javiana	Lineage 3		13	12	17	16	13
SAL_HA0924AA	PNUSAS004225	SAL_HA0924AA	SAL_NA0634AA_AS	PRJNA230403	SRP040281	SAMN05856054	SRS1738688	2016-10-14	2016-10-11								North America	United States							Javiana (Predicted)					Center for Diease Control and Prevention - Enteric Diseases Laboratory Branch (US)		Javiana	D1	l,z28	1,5	Javiana	9	l,z28	1,5	24	17	Javiana	Lineage 3		13	12	17	16	13
SAL_HA0929AA	PNUSAS003814	SAL_HA0929AA	SAL_NA0668AA_AS	PRJNA230403	SRP040281	SAMN05869286	SRS1738683	2016-10-14	2016-10-11	Human	Human	Age: 0-4; stool	2016	1			North America	United States							Javiana (Predicted)					Center for Diease Control and Prevention - Enteric Diseases Laboratory Branch (US)		Javiana	D1	l,z28	1,5	Javiana	9	l,z28	1,5	24	17	Javiana	Lineage 3		13	12	17	16	13
SAL_HA0961AA	PNUSAS004583	SAL_HA0961AA	SAL_NA3269AA_AS	PRJNA230403	SRP040281	SAMN05896250	SRS1750542	2016-10-19	2016-10-18	Human	Human	Age: 0-4; stool	2016	8			North America	United States							Javiana (Predicted)					PulseNet Next Generation Subtyping Methods Unit		Javiana	D1	l,z28	1,5	Javiana	9	l,z28	1,5	24	17	Javiana	Lineage 3		13	12	17	16	13
SAL_HA0966AA	PNUSAS004579	SAL_HA0966AA	SAL_NA1932AA_AS	PRJNA230403	SRP040281	SAMN05896254	SRS1750539	2016-10-19	2016-10-18	Human	Human	Age: 50-59; stool	2016	8			North America	United States							Javiana (Predicted)					PulseNet Next Generation Subtyping Methods Unit		Javiana	D1	l,z28	1,5	Javiana	9	l,z28	1,5	24	17	Javiana	Lineage 3		13	12	17	16	13
SAL_HA0967AA	PNUSAS004576	SAL_HA0967AA	SAL_NA2225AA_AS	PRJNA230403	SRP040281	SAMN05896251	SRS1750537	2016-10-19	2016-10-18	Human	Human	Age: 0-4; stool	2016	8			North America	United States							Javiana (Predicted)					PulseNet Next Generation Subtyping Methods Unit		Javiana	D1	l,z28	1,5	Javiana	9	l,z28	1,5	24	17	Javiana	Lineage 3		13	12	17	16	13
SAL_HA0973AA	PNUSAS004473	SAL_HA0973AA	SAL_NA2226AA_AS	PRJNA230403	SRP040281	SAMN05896239	SRS1750531	2016-10-19	2016-10-18	Human	Human	Age: 5-9; stool	2016	8			North America	United States							Javiana (Predicted)					PulseNet Next Generation Subtyping Methods Unit		Javiana	D1	l,z28	1,5	Javiana	9	l,z28	1,5	24	17	Javiana	Lineage 3		13	12	17	16	13
SAL_HA0974AA	PNUSAS004573	SAL_HA0974AA	SAL_NA2227AA_AS	PRJNA230403	SRP040281	SAMN05896244	SRS1750530	2016-10-19	2016-10-18	Human	Human	Age: 0-4; stool	2016	8			North America	United States							Javiana (Predicted)					PulseNet Next Generation Subtyping Methods Unit		Javiana	D1	l,z28	1,5	Javiana	9	l,z28	1,5	24	17	Javiana	Lineage 3		13	12	17	16	13
SAL_HA0977AA	PNUSAS004572	SAL_HA0977AA	SAL_NA1889AA_AS	PRJNA230403	SRP040281	SAMN05896243	SRS1750527	2016-10-19	2016-10-18	Human	Human	Age: 0-4; stool	2016	8			North America	United States							Javiana (Predicted)					PulseNet Next Generation Subtyping Methods Unit		Javiana	D1	l,z28	1,5	Javiana	9	l,z28	1,5	24	17	Javiana	Lineage 3		13	12	17	16	13
SAL_HA1117AA	CFSAN035993	SAL_HA1117AA	SAL_NA2263AA_AS	PRJNA186035	SRP018785	SAMN03861882	SRS1757204	2016-10-24	2015-01-01	Environment	Soil/Dust	sediment	2015	6			North America	United States	Virginia						Javiana (Predicted)					FDA Center for Food Safety and Applied Nutrition		Javiana	D1	l,z28	1,5	Javiana	9	l,z28	1,5	24	17	Javiana	Lineage 3		13	12	17	16	13
SAL_HA1120AA	CFSAN035990	SAL_HA1120AA	SAL_NA2266AA_AS	PRJNA186035	SRP018785	SAMN03861879	SRS1757201	2016-10-24	2015-01-01	Environment	Soil/Dust	sediment	2015	6			North America	United States	Virginia						Javiana (Predicted)					FDA Center for Food Safety and Applied Nutrition		Javiana	D1	l,z28	1,5	Javiana	9	l,z28	1,5	24	17	Javiana	Lineage 3		13	12	17	16	13
SAL_HA1122AA	CFSAN035999	SAL_HA1122AA	SAL_NA2268AA_AS	PRJNA186035	SRP018785	SAMN03861888	SRS1757199	2016-10-24	2015-01-01	Environment	Soil/Dust	sediment	2015	6			North America	United States	Virginia						Javiana (Predicted)					FDA Center for Food Safety and Applied Nutrition		Javiana	D1	l,z28	1,5	Javiana	9	l,z28	1,5	24	17	Javiana	Lineage 3		13	12	17	16	13
SAL_HA1123AA	CFSAN036001	SAL_HA1123AA	SAL_NA2269AA_AS	PRJNA186035	SRP018785	SAMN03861890	SRS1757198	2016-10-24	2015-01-01	Environment	Soil/Dust	sediment	2015	6			North America	United States	Virginia						Javiana (Predicted)					FDA Center for Food Safety and Applied Nutrition		Javiana	D1	l,z28	1,5	Javiana	9	l,z28	1,5	24	17	Javiana	Lineage 3		13	12	17	16	13
SAL_HA1124AA	CFSAN035989	SAL_HA1124AA	SAL_NA2270AA_AS	PRJNA186035	SRP018785	SAMN03861878	SRS1757197	2016-10-24	2015-01-01	Environment	Soil/Dust	sediment	2015	6			North America	United States	Virginia						Javiana (Predicted)					FDA Center for Food Safety and Applied Nutrition		Javiana	D1	l,z28	1,5	Javiana	9	l,z28	1,5	24	17	Javiana	Lineage 3		13	12	17	16	13
SAL_HA1125AA	CFSAN035992	SAL_HA1125AA	SAL_NA2271AA_AS	PRJNA186035	SRP018785	SAMN03861881	SRS1757196	2016-10-24	2015-01-01	Environment	Soil/Dust	sediment	2015	6			North America	United States	Virginia						Javiana (Predicted)					FDA Center for Food Safety and Applied Nutrition		Javiana	D1	l,z28	1,5	Javiana	9	l,z28	1,5	24	17	Javiana	Lineage 3		13	12	17	16	13
SAL_HA1126AA	CFSAN035991	SAL_HA1126AA	SAL_NA2272AA_AS	PRJNA186035	SRP018785	SAMN03861880	SRS1757195	2016-10-24	2015-01-01	Environment	Soil/Dust	sediment	2015	6			North America	United States	Virginia						Javiana (Predicted)					FDA Center for Food Safety and Applied Nutrition		Javiana	D1	l,z28	1,5	Javiana	9	l,z28	1,5	24	17	Javiana	Lineage 3		13	12	17	16	13
SAL_HA1154AA	CFSAN036004	SAL_HA1154AA	SAL_NA2300AA_AS	PRJNA186035	SRP018785	SAMN03861893	SRS1757206	2016-10-24	2015-01-01	Environment	Soil/Dust	sediment	2015	6			North America	United States	Virginia						Javiana (Predicted)					FDA Center for Food Safety and Applied Nutrition		Javiana	D1	l,z28	1,5	Javiana	9	l,z28	1,5	24	17	Javiana	Lineage 3		13	12	17	16	13
SAL_HA1349AA	PNUSAS004408	SAL_HA1349AA	SAL_NA2496AA_AS	PRJNA230403	SRP040281	SAMN05914749	SRS1751966	2016-10-24	2016-10-19	Human	Human	Age: 80-89; stool	2016	9			North America	United States							Javiana					PulseNet Next Generation Subtyping Methods Unit		Javiana	D1	l,z28	1,5	Javiana	9	l,z28	1,5	24	17	Javiana	Lineage 3		13	12	17	16	13
SAL_HA1351AA	PNUSAS004525	SAL_HA1351AA	SAL_NA2498AA_AS	PRJNA230403	SRP040281	SAMN05913841	SRS1751964	2016-10-24	2016-10-19	Human	Human	Age: 60-69; stool	2016	7			North America	United States							Javiana					Pulsenet		Javiana	D1	l,z28	1,5	Javiana	9	l,z28	1,5	24	17	Javiana	Lineage 3		13	12	17	16	13
SAL_HA1352AA	PNUSAS004524	SAL_HA1352AA	SAL_NA2499AA_AS	PRJNA230403	SRP040281	SAMN05913840	SRS1751963	2016-10-24	2016-10-19	Human	Human	Age: 10-19; stool	2016	7			North America	United States							Javiana					Pulsenet		Javiana	D1	l,z28	1,5	Javiana	9	l,z28	1,5	24	17	Javiana	Lineage 3		13	12	17	16	13
SAL_HA1356AA	PNUSAS004521	SAL_HA1356AA	SAL_NA2503AA_AS	PRJNA230403	SRP040281	SAMN05913837	SRS1751959	2016-10-24	2016-10-19	Human	Human	Age: 0-4; stool	2016	7			North America	United States							Javiana					Pulsenet		Javiana	D1	l,z28	1,5	Javiana	9	l,z28	1,5	24	17	Javiana	Lineage 3		13	12	17	16	13
SAL_HA1358AA	PNUSAS004519	SAL_HA1358AA	SAL_NA2505AA_AS	PRJNA230403	SRP040281	SAMN05913835	SRS1751957	2016-10-24	2016-10-19	Human	Human	Age: 60-69; stool	2016	7			North America	United States							Javiana					Pulsenet		Javiana	D1	l,z28	1,5	Javiana	9	l,z28	1,5	24	17	Javiana	Lineage 3		13	12	17	16	13
SAL_HA1432AA	CFSAN036029	SAL_HA1432AA	SAL_NA2579AA_AS	PRJNA186035	SRP018785	SAMN03861918	SRS1751524	2016-10-24	2015-01-01	Environment	Soil/Dust	sediment	2015	6			North America	United States	Virginia						Javiana (Predicted)					FDA Center for Food Safety and Applied Nutrition		Javiana	D1	l,z28	1,5	Javiana	9	l,z28	1,5	24	17	Javiana	Lineage 3		13	12	17	16	13
SAL_HA1433AA	CFSAN036031	SAL_HA1433AA	SAL_NA2580AA_AS	PRJNA186035	SRP018785	SAMN03861920	SRS1751523	2016-10-24	2015-01-01	Environment	Soil/Dust	sediment	2015	6			North America	United States	Virginia						Javiana (Predicted)					FDA Center for Food Safety and Applied Nutrition		Javiana	D1	l,z28	1,5	Javiana	9	l,z28	1,5	24	17	Javiana	Lineage 3		13	12	17	16	13
SAL_HA1438AA	CFSAN035997	SAL_HA1438AA	SAL_NA2585AA_AS	PRJNA186035	SRP018785	SAMN03861886	SRS1751480	2016-10-24	2015-01-01	Environment	Soil/Dust	sediment	2015	6			North America	United States	Virginia						Javiana (Predicted)					FDA Center for Food Safety and Applied Nutrition		Javiana	D1	l,z28	1,5	Javiana	9	l,z28	1,5	24	17	Javiana	Lineage 3		13	12	17	16	13
SAL_HA1439AA	CFSAN035995	SAL_HA1439AA	SAL_NA2586AA_AS	PRJNA186035	SRP018785	SAMN03861884	SRS1751479	2016-10-24	2015-01-01	Environment	Soil/Dust	sediment	2015	6			North America	United States	Virginia						Javiana (Predicted)					FDA Center for Food Safety and Applied Nutrition		Javiana	D1	l,z28	1,5	Javiana	9	l,z28	1,5	24	17	Javiana	Lineage 3		13	12	17	16	13
SAL_HA1444AA	CFSAN035964	SAL_HA1444AA	SAL_NA2955AA_AS	PRJNA186035	SRP018785	SAMN03861853	SRS1751474	2016-10-24	2015-01-01	Environment	Water/River	water	2015	5			North America	United States	Virginia						Javiana (Predicted)					FDA Center for Food Safety and Applied Nutrition		Javiana	D1	l,z28	1,5	Javiana	9	l,z28	1,5	24	17	Javiana	Lineage 3		13	12	17	16	13
SAL_HA1540AA	PNUSAS004607	SAL_HA1540AA	SAL_NA2673AA_AS	PRJNA230403	SRP040281	SAMN05925212	SRS1759398	2016-10-27	2016-10-25	Human	Human	Age: 50-59; stool	2016	9			North America	United States							Javiana					PulseNet Next Generation Subtyping Methods Unit		Javiana	D1	l,z28	1,5	Javiana	9	l,z28	1,5	24	17	Javiana	Lineage 3		13	12	17	16	13
SAL_HA1579AA	PNUSAS004797	SAL_HA1579AA	SAL_NA2713AA_AS	PRJNA230403	SRP040281	SAMN05930930	SRS1759355	2016-10-27	2016-10-25	Human	Human	Age: 50-59; stool	2016	8			North America	United States							Javiana (Predicted)					PulseNet Next Generation Subtyping Methods Unit		Javiana	D1	l,z28	1,5	Javiana	9	l,z28	1,5	24	17	Javiana	Lineage 3		13	12	17	16	13
SAL_HA1735AA	PNUSAS004873	SAL_HA1735AA	SAL_NA3151AA_AS	PRJNA230403	SRP040281	SAMN05933975	SRS1762213	2016-10-29	2016-10-27	Human	Human	Age: 70-79; URINE CLEAN CATCH	2016	9			North America	United States							Javiana (Predicted)					PulseNet Next Generation Subtyping Methods Unit		Javiana	D1	l,z28	1,5	Javiana	9	l,z28	1,5	24	17	Javiana	Lineage 3		13	12	17	16	13
SAL_HA2510AA	CFSAN035791	SAL_HA2510AA	SAL_OA4601AA_AS	PRJNA186035	SRP018785	SAMN03861681	SRS1769378	2016-11-03	2015-01-01	Environment	Soil/Dust	sediment	2015	1			North America	United States	Virginia						Javiana (Predicted)					FDA Center for Food Safety and Applied Nutrition		Javiana	D1	l,z28	1,5	Javiana	9	l,z28	1,5	24	17	Javiana	Lineage 3		13	12	17	16	13
SAL_HA2512AA	CFSAN035790	SAL_HA2512AA	SAL_OA4603AA_AS	PRJNA186035	SRP018785	SAMN03861680	SRS1769368	2016-11-03	2015-01-01	Environment	Soil/Dust	sediment	2015	1			North America	United States	Virginia						Javiana (Predicted)					FDA Center for Food Safety and Applied Nutrition		Javiana	D1	l,z28	1,5	Javiana	9	l,z28	1,5	24	17	Javiana	Lineage 3		13	12	17	16	13
SAL_HA2513AA	CFSAN035788	SAL_HA2513AA	SAL_OA4604AA_AS	PRJNA186035	SRP018785	SAMN03861678	SRS1769367	2016-11-03	2015-01-01	Environment	Water/River	water	2015	1			North America	United States	Virginia						Javiana (Predicted)					FDA Center for Food Safety and Applied Nutrition		Javiana	D1	l,z28	1,5	Javiana	9	l,z28	1,5	24	17	Javiana	Lineage 3		13	12	17	16	13
SAL_HA2517AA	CFSAN035786	SAL_HA2517AA	SAL_OA4608AA_AS	PRJNA186035	SRP018785	SAMN03861676	SRS1769363	2016-11-03	2015-01-01	Environment	Water/River	water	2015	1			North America	United States	Virginia						Javiana (Predicted)					FDA Center for Food Safety and Applied Nutrition		Javiana	D1	l,z28	1,5	Javiana	9	l,z28	1,5	24	17	Javiana	Lineage 3		13	12	17	16	13
SAL_HA2526AA	CFSAN035773	SAL_HA2526AA	SAL_OA4617AA_AS	PRJNA186035	SRP018785	SAMN03861663	SRS1769354	2016-11-03	2015-01-01	Environment	Water/River	water	2014	12			North America	United States	Virginia						Javiana (Predicted)					FDA Center for Food Safety and Applied Nutrition		Javiana	D1	l,z28	1,5	Javiana	9	l,z28	1,5	24	17	Javiana	Lineage 3		13	12	17	16	13
SAL_HA2530AA	CFSAN035771	SAL_HA2530AA	SAL_OA4621AA_AS	PRJNA186035	SRP018785	SAMN03861661	SRS1769350	2016-11-03	2015-01-01	Environment	Water/River	water	2014	12			North America	United States	Virginia						Javiana (Predicted)					FDA Center for Food Safety and Applied Nutrition		Javiana	D1	l,z28	1,5	Javiana	9	l,z28	1,5	24	17	Javiana	Lineage 3		13	12	17	16	13
SAL_HA2531AA	CFSAN035769	SAL_HA2531AA	SAL_OA4622AA_AS	PRJNA186035	SRP018785	SAMN03861659	SRS1769349	2016-11-03	2015-01-01	Environment	Water/River	water	2014	12			North America	United States	Virginia						Javiana (Predicted)					FDA Center for Food Safety and Applied Nutrition		Javiana	D1	l,z28	1,5	Javiana	9	l,z28	1,5	24	17	Javiana	Lineage 3		13	12	17	16	13
SAL_HA2533AA	CFSAN035772	SAL_HA2533AA	SAL_OA4624AA_AS	PRJNA186035	SRP018785	SAMN03861662	SRS1769347	2016-11-03	2015-01-01	Environment	Water/River	water	2014	12			North America	United States	Virginia						Javiana (Predicted)					FDA Center for Food Safety and Applied Nutrition		Javiana	D1	l,z28	1,5	Javiana	9	l,z28	1,5	24	17	Javiana	Lineage 3		13	12	17	16	13
SAL_HA2549AA	CFSAN035745	SAL_HA2549AA	SAL_OA4640AA_AS	PRJNA186035	SRP018785	SAMN03861635	SRS1769332	2016-11-03	2015-01-01	Environment	Soil/Dust	sediment	2014	10			North America	United States	Virginia						Javiana (Predicted)					FDA Center for Food Safety and Applied Nutrition		Javiana	D1	l,z28	1,5	Javiana	9	l,z28	1,5	24	17	Javiana	Lineage 3		13	12	17	16	13
SAL_HA2551AA	CFSAN035744	SAL_HA2551AA	SAL_OA4642AA_AS	PRJNA186035	SRP018785	SAMN03861634	SRS1769327	2016-11-03	2015-01-01	Environment	Soil/Dust	sediment	2014	10			North America	United States	Virginia						Javiana (Predicted)					FDA Center for Food Safety and Applied Nutrition		Javiana	D1	l,z28	1,5	Javiana	9	l,z28	1,5	24	17	Javiana	Lineage 3		13	12	17	16	13
SAL_HA2559AA	CFSAN035733	SAL_HA2559AA	SAL_OA4650AA_AS	PRJNA186035	SRP018785	SAMN03861623	SRS1769321	2016-11-03	2015-01-01	Environment	Water/River	water	2014	10			North America	United States	Virginia						Javiana (Predicted)					FDA Center for Food Safety and Applied Nutrition		Javiana	D1	l,z28	1,5	Javiana	9	l,z28	1,5	24	17	Javiana	Lineage 3		13	12	17	16	13
SAL_HA2563AA	CFSAN035732	SAL_HA2563AA	SAL_OA4737AA_AS	PRJNA186035	SRP018785	SAMN03861622	SRS1769317	2016-11-03	2015-01-01	Environment	Water/River	water	2014	10			North America	United States	Virginia						Javiana (Predicted)					FDA Center for Food Safety and Applied Nutrition		Javiana	D1	l,z28	1,5	Javiana	9	l,z28	1,5	24	17	Javiana	Lineage 3		13	12	17	16	13
SAL_HA2571AA	CFSAN035716	SAL_HA2571AA	SAL_OA4745AA_AS	PRJNA186035	SRP018785	SAMN03861606	SRS1769309	2016-11-03	2015-01-01	Environment	Soil/Dust	sediment	2014	9			North America	United States	Virginia						Javiana (Predicted)					FDA Center for Food Safety and Applied Nutrition		Javiana	D1	l,z28	1,5	Javiana	9	l,z28	1,5	24	17	Javiana	Lineage 3		13	12	17	16	13
SAL_HA2575AA	CFSAN035715	SAL_HA2575AA	SAL_OA4749AA_AS	PRJNA186035	SRP018785	SAMN03861605	SRS1769304	2016-11-03	2015-01-01	Environment	Soil/Dust	sediment	2014	9			North America	United States	Virginia						Javiana (Predicted)					FDA Center for Food Safety and Applied Nutrition		Javiana	D1	l,z28	1,5	Javiana	9	l,z28	1,5	24	17	Javiana	Lineage 3		13	12	17	16	13
SAL_HA2578AA	CFSAN035712	SAL_HA2578AA	SAL_OA4752AA_AS	PRJNA186035	SRP018785	SAMN03861602	SRS1769302	2016-11-03	2015-01-01	Environment	Soil/Dust	sediment	2014	9			North America	United States	Virginia						Javiana (Predicted)					FDA Center for Food Safety and Applied Nutrition		Javiana	D1	l,z28	1,5	Javiana	9	l,z28	1,5	24	17	Javiana	Lineage 3		13	12	17	16	13
SAL_HA2579AA	CFSAN035711	SAL_HA2579AA	SAL_OA4753AA_AS	PRJNA186035	SRP018785	SAMN03861601	SRS1769301	2016-11-03	2015-01-01	Environment	Soil/Dust	sediment	2014	9			North America	United States	Virginia						Javiana (Predicted)					FDA Center for Food Safety and Applied Nutrition		Javiana	D1	l,z28	1,5	Javiana	9	l,z28	1,5	24	17	Javiana	Lineage 3		13	12	17	16	13
SAL_HA2580AA	CFSAN035709	SAL_HA2580AA	SAL_OA4754AA_AS	PRJNA186035	SRP018785	SAMN03861599	SRS1769300	2016-11-03	2015-01-01	Environment	Soil/Dust	sediment	2014	9			North America	United States	Virginia						Javiana (Predicted)					FDA Center for Food Safety and Applied Nutrition		Javiana	D1	l,z28	1,5	Javiana	9	l,z28	1,5	24	17	Javiana	Lineage 3		13	12	17	16	13
SAL_HA2581AA	CFSAN035710	SAL_HA2581AA	SAL_OA4755AA_AS	PRJNA186035	SRP018785	SAMN03861600	SRS1769299	2016-11-03	2015-01-01	Environment	Soil/Dust	sediment	2014	9			North America	United States	Virginia						Javiana (Predicted)					FDA Center for Food Safety and Applied Nutrition		Javiana	D1	l,z28	1,5	Javiana	9	l,z28	1,5	24	17	Javiana	Lineage 3		13	12	17	16	13
SAL_HA2593AA	CFSAN035695	SAL_HA2593AA	SAL_OA4767AA_AS	PRJNA186035	SRP018785	SAMN03861585	SRS1769287	2016-11-03	2015-01-01	Environment	Water/River	water	2014	9			North America	United States	Virginia						Javiana (Predicted)					FDA Center for Food Safety and Applied Nutrition		Javiana	D1	l,z28	1,5	Javiana	9	l,z28	1,5	24	17	Javiana	Lineage 3		13	12	17	16	13
SAL_HA2594AA	CFSAN035694	SAL_HA2594AA	SAL_OA4768AA_AS	PRJNA186035	SRP018785	SAMN03861584	SRS1769286	2016-11-03	2015-01-01	Environment	Water/River	water	2014	9			North America	United States	Virginia						Javiana (Predicted)					FDA Center for Food Safety and Applied Nutrition		Javiana	D1	l,z28	1,5	Javiana	9	l,z28	1,5	24	17	Javiana	Lineage 3		13	12	17	16	13
SAL_HA2610AA	CFSAN035674	SAL_HA2610AA	SAL_OA4784AA_AS	PRJNA186035	SRP018785	SAMN03861564	SRS1769271	2016-11-03	2015-01-01	Environment	Water/River	water	2014	9			North America	United States	Virginia						Javiana (Predicted)					FDA Center for Food Safety and Applied Nutrition		Javiana	D1	l,z28	1,5	Javiana	9	l,z28	1,5	24	17	Javiana	Lineage 3		13	12	17	16	13
SAL_HA2615AA	CFSAN035671	SAL_HA2615AA	SAL_OA4789AA_AS	PRJNA186035	SRP018785	SAMN03861561	SRS1769265	2016-11-03	2015-01-01	Environment	Water/River	water	2014	9			North America	United States	Virginia						Javiana (Predicted)					FDA Center for Food Safety and Applied Nutrition		Javiana	D1	l,z28	1,5	Javiana	9	l,z28	1,5	24	17	Javiana	Lineage 3		13	12	17	16	13
SAL_HA2616AA	CFSAN035669	SAL_HA2616AA	SAL_OA4790AA_AS	PRJNA186035	SRP018785	SAMN03861559	SRS1769264	2016-11-03	2015-01-01	Environment	Water/River	water	2014	9			North America	United States	Virginia						Javiana (Predicted)					FDA Center for Food Safety and Applied Nutrition		Javiana	D1	l,z28	1,5	Javiana	9	l,z28	1,5	24	17	Javiana	Lineage 3		13	12	17	16	13
SAL_HA2617AA	CFSAN035664	SAL_HA2617AA	SAL_OA4791AA_AS	PRJNA186035	SRP018785	SAMN03861554	SRS1769263	2016-11-03	2015-01-01	Environment	Water/River	water	2014	9			North America	United States	Virginia						Javiana (Predicted)					FDA Center for Food Safety and Applied Nutrition		Javiana	D1	l,z28	1,5	Javiana	9	l,z28	1,5	24	17	Javiana	Lineage 3		13	12	17	16	13
SAL_HA2618AA	CFSAN035667	SAL_HA2618AA	SAL_OA4792AA_AS	PRJNA186035	SRP018785	SAMN03861557	SRS1769261	2016-11-03	2015-01-01	Environment	Water/River	water	2014	9			North America	United States	Virginia						Javiana (Predicted)					FDA Center for Food Safety and Applied Nutrition		Javiana	D1	l,z28	1,5	Javiana	9	l,z28	1,5	24	17	Javiana	Lineage 3		13	12	17	16	13
SAL_HA2619AA	CFSAN035665	SAL_HA2619AA	SAL_OA4793AA_AS	PRJNA186035	SRP018785	SAMN03861555	SRS1769262	2016-11-03	2015-01-01	Environment	Water/River	water	2014	9			North America	United States	Virginia						Javiana (Predicted)					FDA Center for Food Safety and Applied Nutrition		Javiana	D1	l,z28	1,5	Javiana	9	l,z28	1,5	24	17	Javiana	Lineage 3		13	12	17	16	13
SAL_HA2620AA	CFSAN035666	SAL_HA2620AA	SAL_OA4794AA_AS	PRJNA186035	SRP018785	SAMN03861556	SRS1769260	2016-11-03	2015-01-01	Environment	Water/River	water	2014	9			North America	United States	Virginia						Javiana (Predicted)					FDA Center for Food Safety and Applied Nutrition		Javiana	D1	l,z28	1,5	Javiana	9	l,z28	1,5	24	17	Javiana	Lineage 3		13	12	17	16	13
SAL_HA2621AA	CFSAN035663	SAL_HA2621AA	SAL_OA4795AA_AS	PRJNA186035	SRP018785	SAMN03861553	SRS1769259	2016-11-03	2015-01-01	Environment	Water/River	water	2014	9			North America	United States	Virginia						Javiana (Predicted)					FDA Center for Food Safety and Applied Nutrition		Javiana	D1	l,z28	1,5	Javiana	9	l,z28	1,5	24	17	Javiana	Lineage 3		13	12	17	16	13
SAL_HA2622AA	CFSAN035662	SAL_HA2622AA	SAL_OA4796AA_AS	PRJNA186035	SRP018785	SAMN03861552	SRS1769258	2016-11-03	2015-01-01	Environment	Water/River	water	2014	9			North America	United States	Virginia						Javiana (Predicted)					FDA Center for Food Safety and Applied Nutrition		Javiana	D1	l,z28	1,5	Javiana	9	l,z28	1,5	24	17	Javiana	Lineage 3		13	12	17	16	13
SAL_HA2624AA	CFSAN035661	SAL_HA2624AA	SAL_OA4798AA_AS	PRJNA186035	SRP018785	SAMN03861551	SRS1769256	2016-11-03	2015-01-01	Environment	Water/River	water	2014	9			North America	United States	Virginia						Javiana (Predicted)					FDA Center for Food Safety and Applied Nutrition		Javiana	D1	l,z28	1,5	Javiana	9	l,z28	1,5	24	17	Javiana	Lineage 3		13	12	17	16	13
SAL_HA2816AA	NSUOC-0095-W2B	SAL_HA2816AA	SAL_NA5680AA_AS	PRJNA342956	SRP091506	SAMN05803861	SRS1786885	2016-11-08	2015-01-01	Environment	Water/River	water	2015	9			North America	United States	Florida						Javiana (Predicted)					FDA Center for Food Safety and Applied Nutrition		Javiana	D1	l,z28	1,5	Javiana	9	l,z28	1,5	24	17	Javiana	Lineage 3		13	12	17	16	13
SAL_HA2862AA	PNUSAS005029	SAL_HA2862AA	SAL_NA6082AA_AS	PRJNA230403	SRP040281	SAMN05954755	SRS1781527	2016-11-08	2016-11-03								North America	United States							Javiana (Predicted)					PulseNet Next Generation Subtyping Methods Unit		Javiana	D1	l,z28	1,5		-	l,z28	1,5	24	17	Javiana	Lineage 3		13	12	17	16	13
SAL_HA2865AA	PNUSAS005026	SAL_HA2865AA	SAL_NA5693AA_AS	PRJNA230403	SRP040281	SAMN05954752	SRS1781524	2016-11-08	2016-11-03								North America	United States							Javiana (Predicted)					PulseNet Next Generation Subtyping Methods Unit		Javiana	D1	l,z28	1,5	Javiana	9	l,z28	1,5	24	17	Javiana	Lineage 3		13	12	17	16	13
SAL_HA2973AA	PNUSAS004739	SAL_HA2973AA	SAL_OA4878AA_AS	PRJNA230403	SRP040281	SAMN05954747	SRS1778290	2016-11-08	2016-11-02	Human	Human	Age: 5-9; stool	2016	9			North America	United States							Javiana (Predicted)					PulseNet Next Generation Subtyping Methods Unit		Javiana	D1	l,z28	1,5	Javiana	9	l,z28	1,5	24	17	Javiana	Lineage 3		13	12	17	16	13
SAL_HA2974AA	PNUSAS004755	SAL_HA2974AA	SAL_NA5828AA_AS	PRJNA230403	SRP040281	SAMN05956761	SRS1778288	2016-11-08	2016-11-02	Human	Human	Age: 60-69; stool	2016	9			North America	United States							Javiana (Predicted)					PulseNet Next Generation Subtyping Methods Unit		Javiana	D1	l,z28	1,5	Javiana	9	l,z28	1,5	24	17	Javiana	Lineage 3		13	12	17	16	13
SAL_HA2982AA	PNUSAS004623	SAL_HA2982AA	SAL_NA5820AA_AS	PRJNA230403	SRP040281	SAMN05954745	SRS1778277	2016-11-08	2016-11-02	Human	Human	Age: 60-69; blood	2016	9			North America	United States							Javiana (Predicted)					PulseNet Next Generation Subtyping Methods Unit		Javiana	D1	l,z28	1,5	Javiana	9	l,z28	1,5	24	17	Javiana	Lineage 3		13	12	17	16	13
SAL_HA2988AA	PNUSAS004764	SAL_HA2988AA	SAL_NA5814AA_AS	PRJNA230403	SRP040281	SAMN05936823	SRS1778271	2016-11-08	2016-11-02	Human	Human	Age: 10-19; stool	2016	10			North America	United States							Javiana (Predicted)					PulseNet Next Generation Subtyping Methods Unit		Javiana	D1	l,z28	1,5	Javiana	9	l,z28	1,5	3599	17	Javiana	Lineage 3		689	12	17	16	13
SAL_HA3003AA	PNUSAS004753	SAL_HA3003AA	SAL_NA5799AA_AS	PRJNA230403	SRP040281	SAMN05956759	SRS1778240	2016-11-08	2016-11-02	Human	Human	Age: 0-4; stool	2016	9			North America	United States							Javiana (Predicted)					PulseNet Next Generation Subtyping Methods Unit		Javiana	D1	l,z28	1,5	Javiana	9	l,z28	1,5	24	17	Javiana	Lineage 3		13	12	17	16	13
SAL_HA3013AA	PNUSAS004776	SAL_HA3013AA	SAL_NA5789AA_AS	PRJNA230403	SRP040281	SAMN05954735	SRS1778230	2016-11-08	2016-11-02	Human	Human	Age: 5-9; throat	2016	9			North America	United States							Javiana (Predicted)					PulseNet Next Generation Subtyping Methods Unit		Javiana	D1	l,z28	1,5	Javiana	9	l,z28	1,5	24	17	Javiana	Lineage 3		13	12	17	16	13
SAL_HA3020AA	PNUSAS004747	SAL_HA3020AA	SAL_NA5782AA_AS	PRJNA230403	SRP040281	SAMN05956753	SRS1778223	2016-11-08	2016-11-02	Human	Human	Age: 40-49; stool	2016	9			North America	United States							Javiana (Predicted)					PulseNet Next Generation Subtyping Methods Unit		Javiana	D1	l,z28	1,5	Javiana	9	l,z28	1,5	3599	17	Javiana	Lineage 3		689	12	17	16	13
SAL_HA3064AA	PNUSAS004697	SAL_HA3064AA	SAL_NA5738AA_AS	PRJNA230403	SRP040281	SAMN05943264	SRS1777955	2016-11-08	2016-11-02	Human	Human	Age: 5-9; stool	2016	8			North America	United States							Javiana (Predicted)					PulseNet Next Generation Subtyping Methods Unit		Javiana	D1	l,z28	1,5	Javiana	9	l,z28	1,5	24	17	Javiana	Lineage 3		13	12	17	16	13
SAL_HA3134AA	PNUSAS005044	SAL_HA3134AA	SAL_NA6016AA_AS	PRJNA230403	SRP040281	SAMN05968578	SRS1790155	2016-11-09	2016-11-08	Human	Human	Age: 30-39; urine	2016	10			North America	United States							Javiana (Predicted)					PulseNet Next Generation Subtyping Methods Unit		Javiana	D1	l,z28	1,5	Javiana	9	l,z28	1,5	24	17	Javiana	Lineage 3		13	12	17	16	13
SAL_HA3136AA	PNUSAS005042	SAL_HA3136AA	SAL_NA6014AA_AS	PRJNA230403	SRP040281	SAMN05968576	SRS1790154	2016-11-09	2016-11-08	Human	Human	Age: 70-79; stool	2016	10			North America	United States							Javiana (Predicted)					PulseNet Next Generation Subtyping Methods Unit		Javiana	D1	l,z28	1,5	Javiana	9	l,z28	1,5	24	17	Javiana	Lineage 3		13	12	17	16	13
SAL_HA3139AA	PNUSAS005038	SAL_HA3139AA	SAL_NA6011AA_AS	PRJNA230403	SRP040281	SAMN05968572	SRS1790151	2016-11-09	2016-11-08	Human	Human	Age: 80-89; blood	2016	10			North America	United States							Javiana (Predicted)					PulseNet Next Generation Subtyping Methods Unit		Javiana	D1	l,z28	1,5	Javiana	9	l,z28	1,5	24	17	Javiana	Lineage 3		13	12	17	16	13
SAL_HA3156AA	PNUSAS004772	SAL_HA3156AA	SAL_NA5994AA_AS	PRJNA230403	SRP040281	SAMN05947130	SRS1790028	2016-11-09	2016-11-08	Human	Human	Age: 10-19; stool	2016	9			North America	United States							Javiana (Predicted)					PulseNet Next Generation Subtyping Methods Unit		Javiana	D1	l,z28	1,5	Javiana	9	l,z28	1,5	24	17	Javiana	Lineage 3		13	12	17	16	13
SAL_HA3164AA	PNUSAS004540	SAL_HA3164AA	SAL_NA5986AA_AS	PRJNA230403	SRP040281	SAMN05968254	SRS1790020	2016-11-09	2016-11-08	Human	Human	Homo sapiens; Age: 0-4; stool	2016	9			North America	United States							Javiana (Predicted)					PulseNet Next Generation Subtyping Methods Unit		Javiana	B	l,z28	1,5		-	l,z28	1,5	24	17	Javiana	Lineage 3		13	12	17	16	13
SAL_HA3165AA	PNUSAS004533	SAL_HA3165AA	SAL_NA5985AA_AS	PRJNA230403	SRP040281	SAMN05968247	SRS1790019	2016-11-09	2016-11-08	Human	Human	Homo sapiens; Age: 70-79; urine	2016	9			North America	United States							Javiana (Predicted)					PulseNet Next Generation Subtyping Methods Unit		Javiana	D1	l,z28	1,5	Javiana	9	l,z28	1,5	24	17	Javiana	Lineage 3		13	12	17	16	13
SAL_HA3170AA	PNUSAS004536	SAL_HA3170AA	SAL_NA5980AA_AS	PRJNA230403	SRP040281	SAMN05968250	SRS1790014	2016-11-09	2016-11-08	Human	Human	Homo sapiens; Age: 5-9; stool	2016	9			North America	United States							Javiana (Predicted)					PulseNet Next Generation Subtyping Methods Unit		Javiana	B	l,z28	1,5		-	l,z28	1,5	24	17	Javiana	Lineage 3		13	12	17	16	13
SAL_HA3173AA	PNUSAS004406	SAL_HA3173AA	SAL_NA5977AA_AS	PRJNA230403	SRP040281	SAMN05968244	SRS1790012	2016-11-09	2016-11-08	Human	Human	Homo sapiens; Age: 50-59; stool	2016	8			North America	United States							Javiana (Predicted)					PulseNet Next Generation Subtyping Methods Unit		Javiana	D1	l,z28	1,5	Javiana	9	l,z28	1,5	24	17	Javiana	Lineage 3		13	12	17	16	13
SAL_HA3182AA	PNUSAS004988	SAL_HA3182AA	SAL_NA5968AA_AS	PRJNA230403	SRP040281	SAMN05956055	SRS1789901	2016-11-09	2016-11-08	Human	Human	Age: 10-19; stool	2016	9			North America	United States							Javiana (Predicted)					PulseNet Next Generation Subtyping Methods Unit		Javiana	D1	l,z28	1,5	Javiana	9	l,z28	1,5	24	17	Javiana	Lineage 3		13	12	17	16	13
SAL_HA3184AA	PNUSAS004985	SAL_HA3184AA	SAL_NA5966AA_AS	PRJNA230403	SRP040281	SAMN05956052	SRS1789899	2016-11-09	2016-11-08	Human	Human	Age: 0-4; stool	2016	9			North America	United States							Javiana (Predicted)					PulseNet Next Generation Subtyping Methods Unit		Javiana	D1	l,z28	1,5	Javiana	9	l,z28	1,5	24	17	Javiana	Lineage 3		13	12	17	16	13
SAL_HA3190AA	PNUSAS004706	SAL_HA3190AA	SAL_NA5960AA_AS	PRJNA230403	SRP040281	SAMN05943273	SRS1789893	2016-11-09	2016-11-08	Human	Human	Age: 0-4; stool	2016	9			North America	United States							Javiana (Predicted)					PulseNet Next Generation Subtyping Methods Unit		Javiana	D1	l,z28	1,5	Javiana	9	l,z28	1,5	24	17	Javiana	Lineage 3		13	12	17	16	13
SAL_HA3191AA	PNUSAS004703	SAL_HA3191AA	SAL_NA5959AA_AS	PRJNA230403	SRP040281	SAMN05943270	SRS1789892	2016-11-09	2016-11-08	Human	Human	Age: 70-79; stool	2016	9			North America	United States							Javiana (Predicted)					PulseNet Next Generation Subtyping Methods Unit		Javiana	D1	l,z28	1,5	Javiana	9	l,z28	1,5	24	17	Javiana	Lineage 3		13	12	17	16	13
SAL_HA3195AA	PNUSAS004694	SAL_HA3195AA	SAL_NA5955AA_AS	PRJNA230403	SRP040281	SAMN05943261	SRS1789888	2016-11-09	2016-11-08	Human	Human	Age: 80-89; stool	2016	8			North America	United States							Javiana (Predicted)					PulseNet Next Generation Subtyping Methods Unit		Javiana	D1	l,z28	1,5	Javiana	9	l,z28	1,5	24	17	Javiana	Lineage 3		13	12	17	16	13
SAL_HA3204AA	PNUSAS004404	SAL_HA3204AA	SAL_NA5946AA_AS	PRJNA230403	SRP040281	SAMN05943638	SRS1789879	2016-11-09	2016-11-08								North America	United States							Javiana (Predicted)					PulseNet Next Generation Subtyping Methods Unit		Javiana	D1	l,z28	1,5	Javiana	9	l,z28	1,5	24	17	Javiana	Lineage 3		13	12	17	16	13
SAL_HA3205AA	PNUSAS004224	SAL_HA3205AA	SAL_NA5945AA_AS	PRJNA230403	SRP040281	SAMN05943637	SRS1789878	2016-11-09	2016-11-08								North America	United States							Javiana (Predicted)					PulseNet Next Generation Subtyping Methods Unit		Javiana	D1	l,z28	1,5	Javiana	9	l,z28	1,5	24	17	Javiana	Lineage 3		13	12	17	16	13
SAL_HA3814AA	PNUSAS004563	SAL_HA3814AA	SAL_OA4894AA_AS	PRJNA230403	SRP040281	SAMN06017536	SRS1800276	2016-11-16	2016-11-15	Laboratory	Laboratory	Isolated Organism	2015	9			North America	United States							Javiana					PulseNet Next Generation Subtyping Methods Unit		Javiana	D1	l,z28	1,5	Javiana	9	l,z28	1,5	24	17	Javiana	Lineage 3		13	12	17	16	13
SAL_HA3815AA	PNUSAS004558	SAL_HA3815AA	SAL_NA9195AA_AS	PRJNA230403	SRP040281	SAMN06017535	SRS1800262	2016-11-16	2016-11-15	Human	Human	Age: 0-4; stool	2015	9			North America	United States							Javiana (Predicted)					Center for Diease Control and Prevention - Enteric Diseases Laboratory Branch (US)		Javiana	D1	l,z28	1,5	Javiana	9	l,z28	1,5	24	17	Javiana	Lineage 3		13	12	17	16	13
SAL_HA3818AA	PNUSAS004567	SAL_HA3818AA	SAL_OA4895AA_AS	PRJNA230403	SRP040281	SAMN06017545	SRS1800213	2016-11-16	2016-11-15	Human	Human	stool	2015	9			North America	United States							Javiana (Predicted)					PulseNet Next Generation Subtyping Methods Unit		Javiana	D1	l,z28	1,5	Javiana	9	l,z28	1,5	24	17	Javiana	Lineage 3		13	12	17	16	13
SAL_HA3821AA	PNUSAS004569	SAL_HA3821AA	SAL_OA4897AA_AS	PRJNA230403	SRP040281	SAMN06017543	SRS1800190	2016-11-16	2016-11-15	Human	Human	Age: 60-69; stool	2015	9			North America	United States							Javiana					PulseNet Next Generation Subtyping Methods Unit		Javiana	D1	l,z28	1,5	Javiana	9	l,z28	1,5	24	17	Javiana	Lineage 3		13	12	17	16	13
SAL_HA3830AA	PNUSAS004559	SAL_HA3830AA	SAL_OA4902AA_AS	PRJNA230403	SRP040281	SAMN06017534	SRS1800135	2016-11-16	2016-11-15	Laboratory	Laboratory	Isolated Organism	2015	9			North America	United States							Javiana (Predicted)					PulseNet Next Generation Subtyping Methods Unit		Javiana	D1	l,z28	1,5	Javiana	9	l,z28	1,5	24	17	Javiana	Lineage 3		13	12	17	16	13
SAL_HA3831AA	PNUSAS004561	SAL_HA3831AA	SAL_NA9258AA_AS	PRJNA230403	SRP040281	SAMN06017537	SRS1800133	2016-11-16	2016-11-15	Human	Human	Age: 0-4					North America	United States							Javiana (Predicted)					PulseNet Next Generation Subtyping Methods Unit		Javiana	B	l,z28	1,5		-	l,z28	1,5	24	17	Javiana	Lineage 3		13	12	17	16	13
SAL_HA3833AA	PNUSAS004565	SAL_HA3833AA	SAL_OA4903AA_AS	PRJNA230403	SRP040281	SAMN06017542	SRS1800132	2016-11-16	2016-11-15	Human	Human	Age: 70-79	2015	9			North America	United States							Javiana					PulseNet Next Generation Subtyping Methods Unit		Javiana	D1	l,z28	1,5	Javiana	9	l,z28	1,5	24	17	Javiana	Lineage 3		13	12	17	16	13
SAL_HA3834AA	PNUSAS004564	SAL_HA3834AA	SAL_OA4904AA_AS	PRJNA230403	SRP040281	SAMN06017538	SRS1800131	2016-11-16	2016-11-15	Human	Human	Age: 0-4; stool	2015	9			North America	United States							Javiana (Predicted)					PulseNet Next Generation Subtyping Methods Unit		Javiana	D1	l,z28	1,5	Javiana	9	l,z28	1,5	24	17	Javiana	Lineage 3		13	12	17	16	13
SAL_HA3839AA	PNUSAS005143	SAL_HA3839AA	SAL_NA9219AA_AS	PRJNA230403	SRP040281	SAMN06008960	SRS1800126	2016-11-16	2016-11-15	Human	Human	Age: 5-9; stool	2016	9			North America	United States							Javiana (Predicted)					PulseNet Next Generation Subtyping Methods Unit		Javiana	D1	l,z28	1,5	Javiana	9	l,z28	1,5	24	17	Javiana	Lineage 3		13	12	17	16	13
SAL_HA3842AA	PNUSAS004566	SAL_HA3842AA	SAL_NA9170AA_AS	PRJNA230403	SRP040281	SAMN06017544	SRS1800123	2016-11-16	2016-11-15	Human	Human	stool	2015	9			North America	United States							Javiana (Predicted)					PulseNet Next Generation Subtyping Methods Unit		Javiana	D1	l,z28	1,5	Javiana	9	l,z28	1,5	24	17	Javiana	Lineage 3		13	12	17	16	13
SAL_HA3844AA	PNUSAS004560	SAL_HA3844AA	SAL_NA9252AA_AS	PRJNA230403	SRP040281	SAMN06017539	SRS1800121	2016-11-16	2016-11-15	Human	Human	Age: 5-9; Isolated Organism	2015	9			North America	United States							Javiana					PulseNet Next Generation Subtyping Methods Unit		Javiana	D1	l,z28	1,5	Javiana	9	l,z28	1,5	24	17	Javiana	Lineage 3		13	12	17	16	13
SAL_HA3852AA	PNUSAS004557	SAL_HA3852AA	SAL_OA5720AA_AS	PRJNA230403	SRP040281	SAMN06017533	SRS1800113	2016-11-16	2016-11-15	Human	Human	Age: 0-4; Isolated Organism	2015	8			North America	United States							Javiana					PulseNet Next Generation Subtyping Methods Unit		Javiana	D1	l,z28	1,5	Javiana	9	l,z28	1,5	24	17	Javiana	Lineage 3		13	12	17	16	13
SAL_HA3855AA	PNUSAS004570	SAL_HA3855AA	SAL_NA9098AA_AS	PRJNA230403	SRP040281	SAMN06017540	SRS1800110	2016-11-16	2016-11-15	Human	Human	Age: 30-39; stool	2015	9			North America	United States							Javiana					PulseNet Next Generation Subtyping Methods Unit		Javiana	D1	l,z28	1,5	Javiana	9	l,z28	1,5	24	17	Javiana	Lineage 3		13	12	17	16	13
SAL_HA3860AA	PNUSAS004562	SAL_HA3860AA	SAL_OA4914AA_AS	PRJNA230403	SRP040281	SAMN06017541	SRS1800104	2016-11-16	2016-11-15	Human	Human	Age: 40-49; stool	2015	9			North America	United States							Javiana (Predicted)					PulseNet Next Generation Subtyping Methods Unit		Javiana	D1	l,z28	1,5	Javiana	9	l,z28	1,5	24	17	Javiana	Lineage 3		13	12	17	16	13
SAL_HA3872AA	PNUSAS005222	SAL_HA3872AA	SAL_OA4923AA_AS	PRJNA230403	SRP040281	SAMN06008970	SRS1800092	2016-11-16	2016-11-15	Human	Human	Age: 5-9; stool	2016	9			North America	United States							Javiana (Predicted)					PulseNet Next Generation Subtyping Methods Unit		Javiana	D1	l,z28	1,5	Javiana	9	l,z28	1,5	24	17	Javiana	Lineage 3		13	12	17	16	13
SAL_HA3881AA	PNUSAS004881	SAL_HA3881AA	SAL_NA9143AA_AS	PRJNA230403	SRP040281	SAMN06008949	SRS1800083	2016-11-16	2016-11-15	Human	Human	Age: 70-79; stool	2016	9			North America	United States							Javiana (Predicted)					PulseNet Next Generation Subtyping Methods Unit		Javiana	D1	l,z28	1,5	Javiana	9	l,z28	1,5	24	17	Javiana	Lineage 3		13	12	17	16	13
SAL_HA3884AA	PNUSAS005220	SAL_HA3884AA	SAL_OA4927AA_AS	PRJNA230403	SRP040281	SAMN06008968	SRS1800079	2016-11-16	2016-11-15	Human	Human	Age: 10-19; stool					North America	United States							Javiana (Predicted)					PulseNet Next Generation Subtyping Methods Unit		Javiana	D1	l,z28	1,5	Javiana	9	l,z28	1,5	3599	17	Javiana	Lineage 3		689	12	17	16	13
SAL_HA3887AA	PNUSAS005145	SAL_HA3887AA	SAL_OA4929AA_AS	PRJNA230403	SRP040281	SAMN06008962	SRS1800077	2016-11-16	2016-11-15	Human	Human	Age: 0-4; stool	2016	9			North America	United States							Javiana (Predicted)					PulseNet Next Generation Subtyping Methods Unit		Javiana	D1	l,z28	1,5	Javiana	9	l,z28	1,5	24	17	Javiana	Lineage 3		13	12	17	16	13
SAL_HA3898AA	PNUSAS005228	SAL_HA3898AA	SAL_OA4937AA_AS	PRJNA230403	SRP040281	SAMN06008976	SRS1800065	2016-11-16	2016-11-15	Human	Human	Age: 60-69; stool	2016	8			North America	United States							Javiana (Predicted)					PulseNet Next Generation Subtyping Methods Unit		Javiana	D1	l,z28	1,5	Javiana	9	l,z28	1,5	24	17	Javiana	Lineage 3		13	12	17	16	13
SAL_HA3911AA	PNUSAS005229	SAL_HA3911AA	SAL_NA8680AA_AS	PRJNA230403	SRP040281	SAMN06008977	SRS1800052	2016-11-16	2016-11-15	Human	Human	Age: 40-49; stool	2016	8			North America	United States							Javiana (Predicted)					PulseNet Next Generation Subtyping Methods Unit		Javiana	D1	l,z28	1,5	Javiana	9	l,z28	1,5	24	17	Javiana	Lineage 3		13	12	17	16	13
SAL_HA3918AA	PNUSAS005113	SAL_HA3918AA	SAL_NA8732AA_AS	PRJNA230403	SRP040281	SAMN06010559	SRS1800044	2016-11-16	2016-11-15	Human	Human	Age: 30-39; stool					North America	United States							Javiana (Predicted)					PulseNet Next Generation Subtyping Methods Unit		Javiana	D1	l,z28	1,5	Javiana	9	l,z28	1,5	24	17	Javiana	Lineage 3		13	12	17	16	13
SAL_HA4017AA	CFSAN036032	SAL_HA4017AA	SAL_NA8275AA_AS	PRJNA186035	SRP018785	SAMN03861921	SRS1794186	2016-11-16	2015-01-01	Environment	Soil/Dust	sediment	2015	6			North America	United States	Virginia						Javiana (Predicted)					FDA Center for Food Safety and Applied Nutrition		Javiana	D1	l,z28	1,5	Javiana	9	l,z28	1,5	24	17	Javiana	Lineage 3		13	12	17	16	13
SAL_HA4018AA	CFSAN036030	SAL_HA4018AA	SAL_NA8209AA_AS	PRJNA186035	SRP018785	SAMN03861919	SRS1794185	2016-11-16	2015-01-01	Environment	Soil/Dust	sediment	2015	6			North America	United States	Virginia						Javiana (Predicted)					FDA Center for Food Safety and Applied Nutrition		Javiana	D1	l,z28	1,5	Javiana	9	l,z28	1,5	24	17	Javiana	Lineage 3		13	12	17	16	13
SAL_HA4026AA	CFSAN036011	SAL_HA4026AA	SAL_OA5007AA_AS	PRJNA186035	SRP018785	SAMN03861900	SRS1794172	2016-11-16	2015-01-01	Environment	Soil/Dust	sediment	2015	6			North America	United States	Virginia						Javiana (Predicted)					FDA Center for Food Safety and Applied Nutrition		Javiana	D1	l,z28	1,5	Javiana	9	l,z28	1,5	24	17	Javiana	Lineage 3		13	12	17	16	13
SAL_HA4028AA	CFSAN036015	SAL_HA4028AA	SAL_OA5008AA_AS	PRJNA186035	SRP018785	SAMN03861904	SRS1794169	2016-11-16	2015-01-01	Environment	Soil/Dust	sediment	2015	6			North America	United States	Virginia						Javiana (Predicted)					FDA Center for Food Safety and Applied Nutrition		Javiana	D1	l,z28	1,5	Javiana	9	l,z28	1,5	24	17	Javiana	Lineage 3		13	12	17	16	13
SAL_HA4032AA	CFSAN036010	SAL_HA4032AA	SAL_NA8399AA_AS	PRJNA186035	SRP018785	SAMN03861899	SRS1794165	2016-11-16	2015-01-01	Environment	Soil/Dust	sediment	2015	6			North America	United States	Virginia						Javiana (Predicted)					FDA Center for Food Safety and Applied Nutrition		Javiana	D1	l,z28	1,5	Javiana	9	l,z28	1,5	24	17	Javiana	Lineage 3		13	12	17	16	13
SAL_HA4033AA	CFSAN036009	SAL_HA4033AA	SAL_NA8471AA_AS	PRJNA186035	SRP018785	SAMN03861898	SRS1794164	2016-11-16	2015-01-01	Environment	Soil/Dust	sediment	2015	6			North America	United States	Virginia						Javiana (Predicted)					FDA Center for Food Safety and Applied Nutrition		Javiana	D1	l,z28	1,5	Javiana	9	l,z28	1,5	24	17	Javiana	Lineage 3		13	12	17	16	13
SAL_HA4060AA	PNUSAS004762	SAL_HA4060AA	SAL_NA8237AA_AS	PRJNA230403	SRP040281	SAMN05991325	SRS1794036	2016-11-16	2016-11-09	Human	Human	Age: 10-19; stool	2016	9			North America	United States							Javiana (Predicted)					PulseNet Next Generation Subtyping Methods Unit		Javiana	D1	l,z28	1,5	Javiana	9	l,z28	1,5	24	17	Javiana	Lineage 3		13	12	17	16	13
SAL_HA4081AA	PNUSAS005168	SAL_HA4081AA	SAL_NA7780AA_AS	PRJNA230403	SRP040281	SAMN05991017	SRS1793977	2016-11-16	2016-11-09	Human	Human	Age: 70-79; stool	2016	7			North America	United States							Javiana					PulseNet Next Generation Subtyping Methods Unit		Javiana	D1	l,z28	1,5	Javiana	9	l,z28	1,5	24	17	Javiana	Lineage 3		13	12	17	16	13
SAL_HA4156AA	2016K-0953	SAL_HA4156AA	SAL_PA0808AA_AS	PRJNA230403	SRP040281	SAMN06014734	SRS1796008	2016-11-16	2016-11-09								North America	United States							Javiana (Predicted)					Centers for Disease Control and Prevention Enteric Diseases Laboratory Branch		Javiana	D1	l,z28	1,5	Javiana	9	l,z28	1,5	24	17	Javiana	Lineage 3		13	12	17	16	13
SAL_HA4157AA	2016K-0952	SAL_HA4157AA	SAL_OA5203AA_AS	PRJNA230403	SRP040281	SAMN06014728	SRS1796004	2016-11-16	2016-11-09								North America	United States							Javiana (Predicted)					Centers for Disease Control and Prevention Enteric Diseases Laboratory Branch		Javiana	D1	l,z28	1,5	Javiana	9	l,z28	1,5	24	17	Javiana	Lineage 3		13	12	17	16	13
SAL_HA4160AA	2016K-0965	SAL_HA4160AA	SAL_NA7783AA_AS	PRJNA230403	SRP040281	SAMN06014725	SRS1796003	2016-11-16	2016-11-09	Human	Human	Age: 30-39; stool	2016	9			North America	United States							Javiana (Predicted)					Centers for Disease Control and Prevention Enteric Diseases Laboratory Branch		Javiana	D1	l,z28	1,5	Javiana	9	l,z28	1,5	24	17	Javiana	Lineage 3		13	12	17	16	13
SAL_HA4283AA	OSF048437	SAL_HA4283AA	SAL_NA9760AA_AS	PRJNA186035	SRP018785	SAMN04590219	SRS1809746	2016-11-20	2015-01-01	Environment	Plant	Leafy Greens	2015	11			North America	United States	Arizona						Javiana (Predicted)					FDA Center for Food Safety and Applied Nutrition		Javiana	D1	l,z28	1,5	Javiana	9	l,z28	1,5	24	17	Javiana	Lineage 3		13	12	17	16	13
SAL_HA4484AA	CFSAN035975	SAL_HA4484AA	SAL_OA0524AA_AS	PRJNA186035	SRP018785	SAMN03861864	SRS1813179	2016-11-22	2015-01-01	Environment	Soil/Dust	sediment	2015	5			North America	United States	Virginia						Javiana (Predicted)					FDA Center for Food Safety and Applied Nutrition		Javiana	D1	l,z28	1,5	Javiana	9	l,z28	1,5	24	17	Javiana	Lineage 3		13	12	17	16	13
SAL_HA4490AA	CFSAN035976	SAL_HA4490AA	SAL_OA0324AA_AS	PRJNA186035	SRP018785	SAMN03861865	SRS1813173	2016-11-22	2015-01-01	Environment	Soil/Dust	sediment	2015	5			North America	United States	Virginia						Javiana (Predicted)					FDA Center for Food Safety and Applied Nutrition		Javiana	D1	l,z28	1,5	Javiana	9	l,z28	1,5	24	17	Javiana	Lineage 3		13	12	17	16	13
SAL_HA4506AA	CFSAN035963	SAL_HA4506AA	SAL_OA0308AA_AS	PRJNA186035	SRP018785	SAMN03861852	SRS1813157	2016-11-22	2015-01-01	Environment	Water/River	water	2015	5			North America	United States	Virginia						Javiana (Predicted)					FDA Center for Food Safety and Applied Nutrition		Javiana	D1	l,z28	1,5	Javiana	9	l,z28	1,5	24	17	Javiana	Lineage 3		13	12	17	16	13
SAL_HA4512AA	CFSAN035961	SAL_HA4512AA	SAL_OA0302AA_AS	PRJNA186035	SRP018785	SAMN03861850	SRS1813151	2016-11-22	2015-01-01	Environment	Water/River	water	2015	5			North America	United States	Virginia						Javiana (Predicted)					FDA Center for Food Safety and Applied Nutrition		Javiana	D1	l,z28	1,5	Javiana	9	l,z28	1,5	24	17	Javiana	Lineage 3		13	12	17	16	13
SAL_HA4516AA	CFSAN035958	SAL_HA4516AA	SAL_OA0298AA_AS	PRJNA186035	SRP018785	SAMN03861847	SRS1813146	2016-11-22	2015-01-01	Environment	Water/River	water	2015	5			North America	United States	Virginia						Javiana (Predicted)					FDA Center for Food Safety and Applied Nutrition		Javiana	D1	l,z28	1,5	Javiana	9	l,z28	1,5	24	17	Javiana	Lineage 3		13	12	17	16	13
SAL_HA4550AA	CFSAN035946	SAL_HA4550AA	SAL_OA0264AA_AS	PRJNA186035	SRP018785	SAMN03861835	SRS1813103	2016-11-22	2015-01-01	Environment	Water/River	water	2015	5			North America	United States	Virginia						Javiana (Predicted)					FDA Center for Food Safety and Applied Nutrition		Javiana	D1	l,z28	1,5	Javiana	9	l,z28	1,5	24	17	Javiana	Lineage 3		13	12	17	16	13
SAL_HA4565AA	CFSAN035911	SAL_HA4565AA	SAL_OA0416AA_AS	PRJNA186035	SRP018785	SAMN03861800	SRS1813062	2016-11-22	2015-01-01	Environment	Soil/Dust	sediment	2015	4			North America	United States	Virginia						Javiana (Predicted)					FDA Center for Food Safety and Applied Nutrition		Javiana	D1	l,z28	1,5	Javiana	9	l,z28	1,5	24	17	Javiana	Lineage 3		13	12	17	16	13
SAL_HA4613AA	09-0793	SAL_HA4613AA	SAL_OA0186AA_AS	PRJNA353625	SRP093623	SAMN06029915	SRS1812559	2016-11-22	2016-11-20	Human	Human	Homo sapiens					North America	Canada							Javiana	I				Public Health Agency Of Canada		Javiana	D1	l,z28	1,5	Javiana	9	l,z28	1,5	371	17	Javiana	Lineage 3		13	12	17	16	117
SAL_HA4675AA	2970-09-01	SAL_HA4675AA	SAL_OA5820AA_AS	PRJNA353625	SRP093623	SAMN06029954	SRS1816281	2016-11-23	2016-11-22	Human	Human	Homo sapiens					North America	Canada							Javiana	I				Public Health Agency Of Canada		Javiana	D1	l,z28	1,5	Javiana	9	l,z28	1,5	24	17	Javiana	Lineage 3		13	12	17	16	13
SAL_HA4762AA	10-0981	SAL_HA4762AA	SAL_OA0901AA_AS	PRJNA353625	SRP093623	SAMN06030013	SRS1817886	2016-11-24	2016-11-23	Human	Human	Homo sapiens					North America	Canada							Javiana	I				Public Health Agency Of Canada		Javiana	B	l,z28	1,5		-	l,z28	1,5	1547	17	Javiana	Lineage 3		60	12	17	16	13
SAL_HA4804AA	4350-09-01	SAL_HA4804AA	SAL_OA0859AA_AS	PRJNA353625	SRP093623	SAMN06029972	SRS1817221	2016-11-24	2016-11-22	Human	Human	Homo sapiens					North America	Canada							Javiana	I				Public Health Agency Of Canada		Javiana	B	l,z28	1,5		-	l,z28	1,5	24	17	Javiana	Lineage 3		13	12	17	16	13
SAL_HA4805AA	3098-09-01	SAL_HA4805AA	SAL_OA0979AA_AS	PRJNA353625	SRP093623	SAMN06029959	SRS1817220	2016-11-24	2016-11-22	Human	Human	Homo sapiens					North America	Canada							Javiana	I				Public Health Agency Of Canada		Javiana	D1	l,z28	1,5	Javiana	9	l,z28	1,5	24	17	Javiana	Lineage 3		13	12	17	16	13
SAL_HA4884AA	2034-11-01	SAL_HA4884AA	SAL_OA1140AA_AS	PRJNA353625	SRP093623	SAMN06030103	SRS1818502	2016-11-25	2016-11-24	Human	Human	Homo sapiens					North America	Canada							Javiana	I				Public Health Agency Of Canada		Javiana	D1	l,z28	1,5	Javiana	9	l,z28	1,5	1674	17	Javiana	Lineage 3		13	12	17	520	13
SAL_HA4911AA	8121-10-01	SAL_HA4911AA	SAL_OA1109AA_AS	PRJNA353625	SRP093623	SAMN06030074	SRS1818360	2016-11-25	2016-11-23	Human	Human	Homo sapiens					North America	Canada							Javiana	I				Public Health Agency Of Canada		Javiana	D1	l,z28	1,5	Javiana	9	l,z28	1,5	2783	17	Javiana	Lineage 3		13	12	17	16	117
SAL_HA4937AA	3715-10-01	SAL_HA4937AA	SAL_OA1083AA_AS	PRJNA353625	SRP093623	SAMN06030038	SRS1818019	2016-11-25	2016-11-23	Human	Human	Homo sapiens					North America	Canada							Javiana	I				Public Health Agency Of Canada		Javiana	D1	l,z28	1,5	Javiana	9	l,z28	1,5	24	17	Javiana	Lineage 3		13	12	17	16	13
SAL_HA4963AA	2744-10-01	SAL_HA4963AA	SAL_OA1057AA_AS	PRJNA353625	SRP093623	SAMN06030031	SRS1817972	2016-11-25	2016-11-23	Human	Human	Homo sapiens					North America	Canada							Javiana	I				Public Health Agency Of Canada		Javiana	D1	l,z28	1,5		-	l,z28	1,5	371	17	Javiana	Lineage 3		13	12	17	16	117
SAL_HA4990AA	13-0132	SAL_HA4990AA	SAL_OA1871AA_AS	PRJNA353625	SRP093623	SAMN06030289	SRS1819427	2016-11-27	2016-11-25	Human	Human	Homo sapiens					North America	Canada							Javiana	I				Public Health Agency Of Canada		Javiana	D1	l,z28	1,5	Javiana	9	l,z28	1,5	24	17	Javiana	Lineage 3		13	12	17	16	13
SAL_HA4996AA	13-0119	SAL_HA4996AA	SAL_OA1586AA_AS	PRJNA353625	SRP093623	SAMN06030287	SRS1819421	2016-11-27	2016-11-25	Human	Human	Homo sapiens					North America	Canada							Javiana	I				Public Health Agency Of Canada		Javiana	B	l,z28	1,5		-	l,z28	1,5	24	17	Javiana	Lineage 3		13	12	17	16	13
SAL_HA5033AA	13-0002	SAL_HA5033AA	SAL_OA2107AA_AS	PRJNA353625	SRP093623	SAMN06030284	SRS1819383	2016-11-27	2016-11-25	Human	Human	Homo sapiens					North America	Canada							Javiana	I				Public Health Agency Of Canada		Javiana	D1	l,z28	1,5	Javiana	9	l,z28	1,5	24	17	Javiana	Lineage 3		13	12	17	16	13
SAL_HA5046AA	13-1023	SAL_HA5046AA	SAL_OA2067AA_AS	PRJNA353625	SRP093623	SAMN06030303	SRS1819370	2016-11-27	2016-11-25	Human	Human	Homo sapiens					North America	Canada							Javiana	I				Public Health Agency Of Canada		Javiana	D1	l,z28	1,5	Javiana	9	l,z28	1,5	24	17	Javiana	Lineage 3		13	12	17	16	13
SAL_HA5141AA	7312-11-01	SAL_HA5141AA	SAL_OA1311AA_AS	PRJNA353625	SRP093623	SAMN06030156	SRS1819151	2016-11-27	2016-11-24	Human	Human	Homo sapiens					North America	Canada							Javiana	I				Public Health Agency Of Canada		Javiana	B	l,z28	1,5		-	l,z28	1,5	1547	17	Javiana	Lineage 3		60	12	17	16	13
SAL_HA5150AA	2229-12-01	SAL_HA5150AA	SAL_OA1302AA_AS	PRJNA353625	SRP093623	SAMN06030200	SRS1819143	2016-11-27	2016-11-24	Human	Human	Homo sapiens					North America	Canada							Javiana	I				Public Health Agency Of Canada		Javiana	D1	l,z28	1,5	Javiana	9	l,z28	1,5	371	17	Javiana	Lineage 3		13	12	17	16	117
SAL_HA5176AA	12-0236	SAL_HA5176AA	SAL_OA1258AA_AS	PRJNA353625	SRP093623	SAMN06030170	SRS1819116	2016-11-27	2016-11-24	Human	Human	Homo sapiens					North America	Canada							Javiana	I				Public Health Agency Of Canada		Javiana	B	l,z28	1,5		-	l,z28	1,5	3625	17	Javiana	Lineage 3		13	12	17	16	117
SAL_HA5190AA	12-0040	SAL_HA5190AA	SAL_OA1244AA_AS	PRJNA353625	SRP093623	SAMN06030167	SRS1819102	2016-11-27	2016-11-24	Human	Human	Homo sapiens					North America	Canada							Javiana	I				Public Health Agency Of Canada		Javiana	D1	l,z28	1,5	Javiana	9	l,z28	1,5	24	17	Javiana	Lineage 3		13	12	17	16	13
SAL_HA5247AA	PNUSAS005013	SAL_HA5247AA	SAL_OA1834AA_AS	PRJNA230403	SRP040281	SAMN06040858	SRS1820722	2016-11-28	2016-11-28	Human	Human	Age: 30-39; stool	2016	10			North America	United States							Javiana (Predicted)					PulseNet Next Generation Subtyping Methods Unit		Javiana	D1	l,z28	1,5	Javiana	9	l,z28	1,5	3599	17	Javiana	Lineage 3		689	12	17	16	13
SAL_HA5258AA	PNUSAS005466	SAL_HA5258AA	SAL_OA1979AA_AS	PRJNA230403	SRP040281	SAMN06043888	SRS1820709	2016-11-28	2016-11-28	Human	Human	Age: 0-4; stool	2016	9			North America	United States							Javiana (Predicted)					PulseNet Next Generation Subtyping Methods Unit		Javiana	D1	l,z28	1,5	Javiana	9	l,z28	1,5	24	17	Javiana	Lineage 3		13	12	17	16	13
SAL_HA5269AA	PNUSAS005478	SAL_HA5269AA	SAL_OA8352AA_AS	PRJNA230403	SRP040281	SAMN06049489	SRS1820698	2016-11-28	2016-11-28	Human	Human	Homo sapiens; Age: 60-69; stool	2016	9			North America	United States							Javiana (Predicted)					PulseNet Next Generation Subtyping Methods Unit		Javiana	D1	l,z28	1,5	Javiana	9	l,z28	1,5	24	17	Javiana	Lineage 3		13	12	17	16	13
SAL_HA5271AA	PNUSAS005479	SAL_HA5271AA	SAL_OA1967AA_AS	PRJNA230403	SRP040281	SAMN06049490	SRS1820696	2016-11-28	2016-11-28	Human	Human	Homo sapiens; Age: 60-69; stool	2016	10			North America	United States							Javiana (Predicted)					PulseNet Next Generation Subtyping Methods Unit		Javiana	D1	l,z28	1,5	Javiana	9	l,z28	1,5	24	17	Javiana	Lineage 3		13	12	17	16	13
SAL_HA5274AA	PNUSAS005477	SAL_HA5274AA	SAL_OA2054AA_AS	PRJNA230403	SRP040281	SAMN06049488	SRS1820693	2016-11-28	2016-11-28	Human	Human	Homo sapiens; Age: 70-79; stool	2016	9			North America	United States							Javiana (Predicted)					PulseNet Next Generation Subtyping Methods Unit		Javiana	D1	l,z28	1,5	Javiana	9	l,z28	1,5	24	17	Javiana	Lineage 3		13	12	17	16	13
SAL_HA5275AA	PNUSAS005476	SAL_HA5275AA	SAL_OA1963AA_AS	PRJNA230403	SRP040281	SAMN06049486	SRS1820692	2016-11-28	2016-11-28	Human	Human	Homo sapiens; Age: 50-59; stool	2016	9			North America	United States							Javiana (Predicted)					PulseNet Next Generation Subtyping Methods Unit		Javiana	D1	l,z28	1,5	Javiana	9	l,z28	1,5	24	17	Javiana	Lineage 3		13	12	17	16	13
SAL_HA5276AA	PNUSAS005474	SAL_HA5276AA	SAL_OA2053AA_AS	PRJNA230403	SRP040281	SAMN06049485	SRS1820691	2016-11-28	2016-11-28	Human	Human	Homo sapiens; Age: 0-4; stool	2016	9			North America	United States							Javiana (Predicted)					PulseNet Next Generation Subtyping Methods Unit		Javiana	D1	l,z28	1,5	Javiana	9	l,z28	1,5	24	17	Javiana	Lineage 3		13	12	17	16	13
SAL_HA5277AA	PNUSAS005473	SAL_HA5277AA	SAL_OA1961AA_AS	PRJNA230403	SRP040281	SAMN06049484	SRS1820690	2016-11-28	2016-11-28	Human	Human	Homo sapiens; Age: 0-4; stool	2016	8			North America	United States							Javiana					PulseNet Next Generation Subtyping Methods Unit		Javiana	D1	l,z28	1,5	Javiana	9	l,z28	1,5	24	17	Javiana	Lineage 3		13	12	17	16	13
SAL_HA5279AA	PNUSAS005471	SAL_HA5279AA	SAL_OA2052AA_AS	PRJNA230403	SRP040281	SAMN06049482	SRS1820688	2016-11-28	2016-11-28	Human	Human	Homo sapiens; Age: 10-19; stool	2016	8			North America	United States							Javiana					PulseNet Next Generation Subtyping Methods Unit		Javiana	D1	l,z28	1,5	Javiana	9	l,z28	1,5	24	17	Javiana	Lineage 3		13	12	17	16	13
SAL_HA5281AA	PNUSAS005470	SAL_HA5281AA	SAL_OA1800AA_AS	PRJNA230403	SRP040281	SAMN06049481	SRS1820686	2016-11-28	2016-11-28	Human	Human	Homo sapiens; Age: 20-29; stool	2016	8			North America	United States							Javiana					PulseNet Next Generation Subtyping Methods Unit		Javiana	D1	l,z28	1,5		-	l,z28	1,5	24	17	Javiana	Lineage 3		13	12	17	16	13
SAL_HA5282AA	PNUSAS005472	SAL_HA5282AA	SAL_OA1958AA_AS	PRJNA230403	SRP040281	SAMN06049483	SRS1820685	2016-11-28	2016-11-28	Human	Human	Homo sapiens; Age: 60-69; stool	2016	8			North America	United States							Javiana					PulseNet Next Generation Subtyping Methods Unit		Javiana	D1	l,z28	1,5	Javiana	9	l,z28	1,5	24	17	Javiana	Lineage 3		13	12	17	16	13
SAL_HA5297AA	PNUSAS005198	SAL_HA5297AA	SAL_OA1949AA_AS	PRJNA230403	SRP040281	SAMN06045791	SRS1820670	2016-11-28	2016-11-28	Human	Human	Age: 60-69; stool	2016	9			North America	United States							Javiana					PulseNet Next Generation Subtyping Methods Unit		Javiana	D1	l,z28	1,5	Javiana	9	l,z28	1,5	24	17	Javiana	Lineage 3		13	12	17	16	13
SAL_HA5304AA	PNUSAS005197	SAL_HA5304AA	SAL_OA1777AA_AS	PRJNA230403	SRP040281	SAMN06045790	SRS1820663	2016-11-28	2016-11-28	Human	Human	Age: 70-79; stool	2016	9			North America	United States							Javiana					PulseNet Next Generation Subtyping Methods Unit		Javiana	D1	l,z28	1,5	Javiana	9	l,z28	1,5	24	17	Javiana	Lineage 3		13	12	17	16	13
SAL_HA5342AA	FDA0979958-000-001	SAL_HA5342AA	SAL_OA1925AA_AS	PRJNA186035	SRP018785	SAMN05968933	SRS1820621	2016-11-28	2015-01-01	Aquatic Animal	Shellfish	FROZEN LOBSTER TAI	2016	9			South America	Brazil							Javiana (Predicted)					FDA Center for Food Safety and Applied Nutrition		Javiana	D1	l,z28	1,5	Javiana	9	l,z28	1,5	1674	17	Javiana	Lineage 3		13	12	17	520	13
SAL_HA5401AA	13-7331	SAL_HA5401AA	SAL_OA2081AA_AS	PRJNA353625	SRP093623	SAMN06030370	SRS1819765	2016-11-28	2016-11-26	Human	Human	Homo sapiens					North America	Canada							Javiana	I				Public Health Agency Of Canada		Javiana	D1	l,z28	1,5	Javiana	9	l,z28	1,5	371	17	Javiana	Lineage 3		13	12	17	16	117
SAL_HA5417AA	13-7437	SAL_HA5417AA	SAL_OA1664AA_AS	PRJNA353625	SRP093623	SAMN06030372	SRS1819749	2016-11-28	2016-11-26	Human	Human	Homo sapiens					North America	Canada							Javiana	I				Public Health Agency Of Canada		Javiana	D1	l,z28	1,5	Javiana	9	l,z28	1,5	371	17	Javiana	Lineage 3		13	12	17	16	117
SAL_HA5422AA	13-4047	SAL_HA5422AA	SAL_OA1659AA_AS	PRJNA353625	SRP093623	SAMN06030336	SRS1819744	2016-11-28	2016-11-26	Human	Human	Homo sapiens					North America	Canada							Javiana	I				Public Health Agency Of Canada		Javiana	D1	l,z28	1,5	Javiana	9	l,z28	1,5	371	17	Javiana	Lineage 3		13	12	17	16	117
SAL_HA5541AA	CFSAN035768	SAL_HA5541AA	SAL_FB8549AA_AS	PRJNA186035	SRP018785	SAMN03861658	SRS1824595	2016-11-30	2015-01-01	Environment	Water/River	water	2014	12			North America	United States	Virginia						Javiana (Predicted)					FDA Center for Food Safety and Applied Nutrition		Javiana	D1	l,z28	1,5	Javiana	9	l,z28	1,5	24	17	Javiana	Lineage 3		13	12	17	16	13
SAL_HA5542AA	CFSAN035770	SAL_HA5542AA	SAL_OA4109AA_AS	PRJNA186035	SRP018785	SAMN03861660	SRS1824596	2016-11-30	2015-01-01	Environment	Water/River	water	2014	12			North America	United States	Virginia						Javiana (Predicted)					FDA Center for Food Safety and Applied Nutrition		Javiana	D1	l,z28	1,5	Javiana	9	l,z28	1,5	24	17	Javiana	Lineage 3		13	12	17	16	13
SAL_HA5543AA	CFSAN035785	SAL_HA5543AA	SAL_FB8550AA_AS	PRJNA186035	SRP018785	SAMN03861675	SRS1824597	2016-11-30	2015-01-01	Environment	Water/River	water	2015	1			North America	United States	Virginia						Javiana (Predicted)					FDA Center for Food Safety and Applied Nutrition		Javiana	D1	l,z28	1,5	Javiana	9	l,z28	1,5	24	17	Javiana	Lineage 3		13	12	17	16	13
SAL_HA5550AA	CFSAN035686	SAL_HA5550AA	SAL_FB8570AA_AS	PRJNA186035	SRP018785	SAMN03861576	SRS1824586	2016-11-30	2015-01-01	Environment	Water/River	water	2014	9			North America	United States	Virginia						Javiana (Predicted)					FDA Center for Food Safety and Applied Nutrition		Javiana	D1	l,z28	1,5	Javiana	9	l,z28	1,5	24	17	Javiana	Lineage 3		13	12	17	16	13
SAL_HA5553AA	CFSAN035668	SAL_HA5553AA	SAL_FB8576AA_AS	PRJNA186035	SRP018785	SAMN03861558	SRS1824583	2016-11-30	2015-01-01	Environment	Water/River	water	2014	9			North America	United States	Virginia						Javiana (Predicted)					FDA Center for Food Safety and Applied Nutrition		Javiana	D1	l,z28	1,5	Javiana	9	l,z28	1,5	24	17	Javiana	Lineage 3		13	12	17	16	13
SAL_HA5719AA	CFSAN035787	SAL_HA5719AA	SAL_OA2609AA_AS	PRJNA186035	SRP018785	SAMN03861677	SRS1824598	2016-11-30	2015-01-01	Environment	Water/River	water	2015	1			North America	United States	Virginia						Javiana (Predicted)					FDA Center for Food Safety and Applied Nutrition		Javiana	D1	l,z28	1,5	Javiana	9	l,z28	1,5	24	17	Javiana	Lineage 3		13	12	17	16	13
SAL_HA5742AA	PNUSAS005008	SAL_HA5742AA	SAL_OA2603AA_AS	PRJNA230403	SRP040281	SAMN06049160	SRS1823624	2016-11-30	2016-11-29	Human	Human	Age: 60-69; stool	2016	10			North America	United States							Javiana (Predicted)					PulseNet Next Generation Subtyping Methods Unit		Javiana	D1	l,z28	1,5	Javiana	9	l,z28	1,5	24	17	Javiana	Lineage 3		13	12	17	16	13
[truncated: 2,647 more rows]
[truncated: 25 more columns]

## Sheet: B_Derby
IDENTIFIERS								DATES		METADATA																						SISTR1				SeqSero2				ACHTMAN 7 GENE MLST
[truncated: 3,043 more rows]
[truncated: 25 more columns]

## Sheet: C_Kentucky
IDENTIFIERS								DATES		METADATA																						SISTR1				SeqSero2				ACHTMAN 7 GENE MLST
[truncated: 8,436 more rows]
[truncated: 25 more columns]

## Sheet: D_Mississippi
IDENTIFIERS								DATES		METADATA																						SISTR1				SeqSero2				ACHTMAN 7 GENE MLST
[truncated: 894 more rows]
[truncated: 25 more columns]

## Sheet: E_Montevideo
IDENTIFIERS								DATES		METADATA																						SISTR1				SeqSero2				ACHTMAN 7 GENE MLST
[truncated: 4,446 more rows]
[truncated: 25 more columns]

[truncated: 3 more sheets: F_Newport, G_Saintpaul, H_Senftenberg]
