# Supplementary material for: Genomic characterization and phylogenetic analysis of Salmonella enterica serovar Javiana
Source: PeerJ. 2020 Nov 20;8:e10256. doi: 10.7717/peerj.10256 (PMC7682435; doi:10.7717/peerj.10256)
Supplement: Data S4 — Clustered matrices contain hqSNP distances between isolates as determined by the CFSAN SNP Pipeline (Davis et al., 2015) . The seven tabs (A, B, B2, C, C2, D, and D2) contain the results from when isolates from when all isolates were analyzed together with the external reference or the three internal references and the last six tabs (E, F, G, H, I, and J) from when the clades were analyzed independently with the external reference or the respective internal reference. Cells are colored to reflect hqSNP distances (low are white, high are dark red). Potential clusters at various hqSNP distance thresholds are indicated (£25 hqSNPs with dashed lines, ≤10 hqSNPs with dotted lines, and £5 hqSNPs with solid lines). [file peerj-08-10256-s008.xlsx]

## Sheet: Data Set S2 - hqSNP Matrices
Data S4. Clustered hqSNP Distance Matrix Heatmaps (TN Clades I, II, and III and All Isolates)
Clustered matrices contain hqSNP distances between isolates as determined by the CFSAN SNP Pipeline (Davis et al., 2015). The seven tabs (A, B, B2, C, C2, D, and D2) contain the results from when isolates from when all isolates were analyzed together with the external reference or the three internal references and the last six tabs (E, F, G, H, I, and J) from when the clades were analyzed indepen…
Tab	Isolates Included	Reference Genome
A	all	GCF_000341425.1
B	all	SRS2420927
B2	all (only CI shown)	SRS2420927
C	all	SRS2822480
C2	all (only CII shown)	SRS2822480
D	all	SRS3010019
D2	all (only CIII shown)	SRS3010019
E	clade I	GCF_000341425.1
F	clade I	SRS2420927
G	clade II	GCF_000341425.1
H	clade II	SRS2822480
I	clade III	GCF_000341425.1
J	clade III	SRS3010019

## Sheet: A
	SRS2850296	SRS2628553	SRS2783476	SRS2998869	SRS2895509	SRS3453943	SRS3384774	SRS2998847	SRS3708648	SRS2547237	SRS3643394	SRS3471848	SRS3531728	SRS3871678	SRS3080280	SRS3080274	SRS3721753	SRS2761294	SRS3614304	SRS3007164	SRS2660215	SRS3932748	SRS3531727	SRS2609391	SRS3855333	SRS2922972	SRS3742753	SRS3643366	SRS3614303	SRS2420927	SRS2761182	SRS2845130	SRS2547417	SRS2525483	SRS2998915	SRS3932840	SRS3892739	SRS2938629	SRS3570561	SRS3703452	SRS3871671	SRS3877810	SRS3218596	SRS3703451	SRS2998873	SRS3703470	SRS3876540	SRS2628565	SRS3007170
SRS2850296	0	91	598	586	590	582	586	578	593	588	605	593	595	590	592	590	600	590	592	597	588	591	589	588	590	591	586	585	603	597	602	596	595	593	597	600	597	590	600	601	589	588	594	598	600	593	587	585	592
SRS2628553	91	0	580	568	571	563	567	559	575	572	589	577	579	574	576	574	584	574	576	581	572	575	573	572	574	575	570	569	587	581	586	580	579	577	581	584	581	574	582	585	573	573	576	581	583	577	571	569	571
SRS2783476	598	580	0	20	230	222	226	218	241	245	254	241	243	238	239	238	247	238	240	245	238	239	239	236	238	239	234	232	251	247	250	246	245	244	246	249	246	240	250	250	239	239	244	246	246	243	238	236	240
SRS2998869	586	568	20	0	218	210	214	205	229	233	242	229	231	226	227	226	235	226	228	233	226	227	227	224	226	227	222	220	239	235	237	234	233	232	234	237	234	228	238	238	227	227	233	234	234	231	227	224	228
SRS2895509	590	571	230	218	0	10	10	9	221	233	223	214	212	216	221	220	216	216	216	217	220	213	213	214	215	213	212	209	225	225	223	223	218	225	218	218	219	214	217	221	214	214	220	212	213	213	218	217	216
SRS3453943	582	563	222	210	10	0	0	4	213	224	219	210	208	212	213	212	212	212	212	213	212	209	209	210	211	209	208	205	221	221	218	219	214	221	214	214	215	210	213	217	210	210	212	208	209	209	214	213	212
SRS3384774	586	567	226	214	10	0	0	5	216	228	218	209	208	211	216	215	211	211	211	213	215	208	208	209	210	208	207	204	220	220	218	218	213	220	212	213	214	209	212	216	209	210	215	207	207	208	213	212	211
SRS2998847	578	559	218	205	9	4	5	0	209	219	218	208	207	211	211	210	210	211	211	212	210	207	208	208	210	208	206	204	220	219	216	218	212	216	212	212	213	209	211	216	209	208	210	206	207	207	213	208	209
SRS3708648	593	575	241	229	221	213	216	209	0	72	78	64	68	65	64	62	71	63	65	67	62	65	64	61	60	63	58	58	77	71	73	69	68	67	70	72	69	67	72	72	66	63	68	71	71	69	63	60	64
SRS2547237	588	572	245	233	233	224	228	219	72	0	85	66	76	69	65	63	74	65	72	72	62	67	69	61	64	67	60	62	81	72	74	71	69	68	73	76	70	69	76	76	69	66	70	77	77	71	63	60	69
SRS3643394	605	589	254	242	223	219	218	218	78	85	0	36	30	34	40	38	36	35	33	35	38	31	30	34	32	31	29	27	76	78	76	75	70	76	70	70	72	67	75	72	68	69	77	69	67	66	70	69	77
SRS3471848	593	577	241	229	214	210	209	208	64	66	36	0	26	28	30	28	26	25	29	25	28	24	24	23	22	22	20	20	65	63	61	61	56	59	58	57	57	56	60	58	56	54	63	60	58	55	56	52	61
SRS3531728	595	579	243	231	212	208	208	207	68	76	30	26	0	24	30	28	26	25	23	25	28	21	20	24	22	21	19	17	66	68	66	65	60	66	61	60	62	57	65	62	58	59	68	59	58	56	61	59	67
SRS3871678	590	574	238	226	216	212	211	211	65	69	34	28	24	0	17	16	18	17	17	17	16	15	14	16	14	13	11	11	70	70	68	67	62	65	63	62	64	61	66	64	62	61	66	62	62	60	63	58	68
SRS3080280	592	576	239	227	221	213	216	211	64	65	40	30	30	17	0	1	20	14	20	16	13	13	13	10	12	11	9	9	73	66	65	65	64	62	66	65	65	62	67	65	59	59	62	68	66	62	59	55	64
SRS3080274	590	574	238	226	220	212	215	210	62	63	38	28	28	16	1	0	18	13	18	14	12	12	12	9	10	10	8	8	71	65	63	63	62	61	64	63	63	61	66	64	58	57	61	66	64	61	58	54	63
SRS3721753	600	584	247	235	216	212	211	210	71	74	36	26	26	18	20	18	0	11	15	12	14	10	10	13	13	13	11	11	70	67	65	65	60	67	61	62	61	60	64	63	60	58	67	64	62	58	60	59	66
SRS2761294	590	574	238	226	216	212	211	211	63	65	35	25	25	17	14	13	11	0	14	10	9	9	9	12	11	11	9	9	68	66	65	64	59	62	60	60	60	59	63	61	59	57	62	63	60	58	58	55	64
SRS3614304	592	576	240	228	216	212	211	211	65	72	33	29	23	17	20	18	15	14	0	6	6	6	5	17	15	14	12	10	69	71	69	68	63	66	64	63	65	60	68	65	61	62	68	62	61	59	64	59	69
SRS3007164	597	581	245	233	217	213	213	212	67	72	35	25	25	17	16	14	12	10	6	0	2	5	5	13	11	11	9	9	68	67	65	64	59	65	61	60	61	59	64	61	60	58	64	63	60	59	60	58	66
SRS2660215	588	572	238	226	220	212	215	210	62	62	38	28	28	16	13	12	14	9	6	2	0	4	4	11	10	10	8	8	71	65	63	63	62	61	63	63	63	61	65	64	58	57	60	65	63	62	57	54	63
SRS3932748	591	575	239	227	213	209	208	207	65	67	31	24	21	15	13	12	10	9	6	5	4	0	3	11	10	10	8	8	67	65	63	63	58	64	59	59	59	58	62	60	58	56	61	60	59	56	58	57	64
SRS3531727	589	573	239	227	213	209	208	208	64	69	30	24	20	14	13	12	10	9	5	5	4	3	0	12	10	9	7	7	66	66	64	63	58	64	59	58	60	57	62	60	58	57	62	58	58	56	58	57	65
SRS2609391	588	572	236	224	214	210	209	208	61	61	34	23	24	16	10	9	13	12	17	13	11	11	12	0	10	10	8	8	67	64	62	62	57	61	59	59	58	57	61	60	57	55	59	61	60	56	56	53	62
SRS3855333	590	574	238	226	215	211	210	210	60	64	32	22	22	14	12	10	13	11	15	11	10	10	10	10	0	8	6	6	65	64	62	61	56	59	59	57	58	56	61	58	57	55	60	60	58	56	57	52	62
SRS2922972	591	575	239	227	213	209	208	208	63	67	31	22	21	13	11	10	13	11	14	11	10	10	9	10	8	0	4	4	65	64	62	61	56	62	58	57	58	56	61	58	57	55	60	60	57	55	56	55	63
SRS3742753	586	570	234	222	212	208	207	206	58	60	29	20	19	11	9	8	11	9	12	9	8	8	7	8	6	4	0	2	63	62	59	59	54	57	55	55	56	54	59	56	55	53	58	58	54	53	55	50	60
SRS3643366	585	569	232	220	209	205	204	204	58	62	27	20	17	11	9	8	11	9	10	9	8	8	7	8	6	4	2	0	63	62	60	59	54	57	55	55	56	54	59	56	55	53	58	56	54	53	55	50	60
SRS3614303	603	587	251	239	225	221	220	220	77	81	76	65	66	70	73	71	70	68	69	68	71	67	66	67	65	65	63	63	0	35	35	34	29	30	29	30	29	27	32	29	28	26	37	31	30	28	30	25	45
SRS2420927	597	581	247	235	225	221	220	219	71	72	78	63	68	70	66	65	67	66	71	67	65	65	66	64	64	64	62	62	35	0	32	32	27	29	27	29	26	25	28	18	15	13	30	30	30	26	26	23	42
SRS2761182	602	586	250	237	223	218	218	216	73	74	76	61	66	68	65	63	65	65	69	65	63	63	64	62	62	62	59	60	35	32	0	31	25	31	28	26	26	26	29	28	26	23	27	29	14	24	25	24	41
SRS2845130	596	580	246	234	223	219	218	218	69	71	75	61	65	67	65	63	65	64	68	64	63	63	63	62	61	61	59	59	34	32	31	0	25	28	26	26	26	25	28	27	25	23	27	28	26	24	24	21	40
SRS2547417	595	579	245	233	218	214	213	212	68	69	70	56	60	62	64	62	60	59	63	59	62	58	58	57	56	56	54	54	29	27	25	25	0	23	21	21	21	20	24	22	20	18	26	24	21	19	18	16	35
SRS2525483	593	577	244	232	225	221	220	216	67	68	76	59	66	65	62	61	67	62	66	65	61	64	64	61	59	62	57	57	30	29	31	28	23	0	25	27	23	21	28	25	24	20	29	29	28	26	22	19	39
SRS2998915	597	581	246	234	218	214	212	212	70	73	70	58	61	63	66	64	61	60	64	61	63	59	59	59	59	58	55	55	29	27	28	26	21	25	0	23	21	19	23	23	19	18	27	23	21	19	20	19	37
SRS3932840	600	584	249	237	218	214	213	212	72	76	70	57	60	62	65	63	62	60	63	60	63	59	58	59	57	57	55	55	30	29	26	26	21	27	23	0	23	21	25	23	22	20	29	24	22	20	21	20	38
SRS3892739	597	581	246	234	219	215	214	213	69	70	72	57	62	64	65	63	61	60	65	61	63	59	60	58	58	58	56	56	29	26	26	26	21	23	21	23	0	9	13	22	19	17	27	25	24	20	20	17	36
SRS2938629	590	574	240	228	214	210	209	209	67	69	67	56	57	61	62	61	60	59	60	59	61	58	57	57	56	56	54	54	27	25	26	25	20	21	19	21	9	0	5	20	18	16	25	21	21	18	18	16	35
SRS3570561	600	582	250	238	217	213	212	211	72	76	75	60	65	66	67	66	64	63	68	64	65	62	62	61	61	61	59	59	32	28	29	28	24	28	23	25	13	5	0	25	21	19	28	24	26	22	23	22	34
SRS3703452	601	585	250	238	221	217	216	216	72	76	72	58	62	64	65	64	63	61	65	61	64	60	60	60	58	58	56	56	29	18	28	27	22	25	23	23	22	20	25	0	9	9	30	26	24	22	22	20	37
SRS3871671	589	573	239	227	214	210	209	209	66	69	68	56	58	62	59	58	60	59	61	60	58	58	58	57	57	57	55	55	28	15	26	25	20	24	19	22	19	18	21	9	0	6	23	21	22	18	19	18	35
SRS3877810	588	573	239	227	214	210	210	208	63	66	69	54	59	61	59	57	58	57	62	58	57	56	57	55	55	55	53	53	26	13	23	23	18	20	18	20	17	16	19	9	6	0	22	20	21	17	17	14	33
SRS3218596	594	576	244	233	220	212	215	210	68	70	77	63	68	66	62	61	67	62	68	64	60	61	62	59	60	60	58	58	37	30	27	27	26	29	27	29	27	25	28	30	23	22	0	29	28	25	20	21	33
SRS3703451	598	581	246	234	212	208	207	206	71	77	69	60	59	62	68	66	64	63	62	63	65	60	58	61	60	60	58	56	31	30	29	28	24	29	23	24	25	21	24	26	21	20	29	0	21	19	23	22	35
SRS2998873	600	583	246	234	213	209	207	207	71	77	67	58	58	62	66	64	62	60	61	60	63	59	58	60	58	57	54	54	30	30	14	26	21	28	21	22	24	21	26	24	22	21	28	21	0	20	22	21	35
SRS3703470	593	577	243	231	213	209	208	207	69	71	66	55	56	60	62	61	58	58	59	59	62	56	56	56	56	55	53	53	28	26	24	24	19	26	19	20	20	18	22	22	18	17	25	19	20	0	18	18	35
SRS3876540	587	571	238	227	218	214	213	213	63	63	70	56	61	63	59	58	60	58	64	60	57	58	58	56	57	56	55	55	30	26	25	24	18	22	20	21	20	18	23	22	19	17	20	23	22	18	0	14	33
SRS2628565	585	569	236	224	217	213	212	208	60	60	69	52	59	58	55	54	59	55	59	58	54	57	57	53	52	55	50	50	25	23	24	21	16	19	19	20	17	16	22	20	18	14	21	22	21	18	14	0	31
SRS3007170	592	571	240	228	216	212	211	209	64	69	77	61	67	68	64	63	66	64	69	66	63	64	65	62	62	63	60	60	45	42	41	40	35	39	37	38	36	35	34	37	35	33	33	35	35	35	33	31	0
SRS3471904	598	577	245	233	216	212	211	210	68	74	76	62	66	68	65	64	66	65	69	65	64	64	64	63	62	62	60	60	45	43	41	41	36	42	37	37	37	36	35	37	36	34	33	36	33	35	34	35	10
SRS3453937	601	580	248	236	217	213	212	211	69	77	76	62	66	68	70	68	67	65	69	65	68	64	64	64	62	62	60	60	45	44	41	41	36	39	39	37	38	36	36	37	37	35	38	36	34	36	35	32	10
SRS3742747	593	572	241	229	216	212	211	210	65	71	76	62	66	68	65	64	67	65	69	65	64	64	64	64	62	62	60	60	45	44	41	41	36	39	39	37	38	36	35	37	37	35	34	35	34	36	35	32	10
SRS2938622	592	573	242	230	216	212	211	211	64	70	73	59	63	65	62	61	64	62	66	62	61	61	61	61	59	59	57	57	42	41	39	38	33	36	36	34	35	33	34	34	34	32	33	34	33	33	32	29	9
SRS2938662	590	575	242	230	215	211	210	210	65	71	64	58	54	58	64	62	60	59	57	59	62	55	54	58	56	55	53	51	36	40	36	35	30	33	31	30	32	27	34	32	28	29	37	28	28	26	29	26	28
SRS2442409	983	969	1080	1069	1067	1058	1061	1052	1076	1075	1089	1076	1080	1073	1075	1074	1083	1073	1077	1081	1071	1075	1073	1071	1075	1075	1068	1068	1089	1081	1084	1080	1078	1077	1080	1083	1081	1074	1081	1085	1073	1073	1076	1079	1081	1078	1071	1069	1073
SRS2822480	965	948	1061	1052	1051	1043	1046	1038	1058	1058	1071	1059	1062	1057	1057	1056	1064	1054	1059	1062	1054	1059	1057	1053	1056	1056	1051	1051	1072	1063	1067	1061	1060	1059	1060	1064	1063	1056	1063	1067	1057	1055	1057	1063	1064	1061	1051	1050	1055
SRS3944395	958	941	1055	1046	1047	1039	1042	1034	1054	1053	1067	1054	1058	1053	1052	1051	1060	1049	1055	1057	1049	1055	1053	1048	1051	1052	1047	1047	1067	1058	1062	1056	1055	1054	1056	1060	1058	1052	1058	1062	1053	1050	1052	1059	1060	1057	1046	1045	1050
SRS3975519	956	940	1054	1045	1044	1036	1039	1031	1050	1049	1063	1050	1054	1048	1048	1047	1056	1045	1051	1053	1045	1050	1048	1044	1047	1048	1043	1042	1063	1054	1058	1052	1051	1050	1052	1056	1054	1047	1055	1058	1048	1046	1049	1056	1056	1052	1042	1041	1047
SRS2998855	947	932	1055	1043	1049	1041	1043	1036	1052	1049	1063	1052	1054	1049	1051	1050	1058	1048	1048	1054	1046	1049	1047	1047	1050	1050	1044	1043	1063	1057	1061	1055	1054	1053	1053	1058	1057	1048	1061	1059	1049	1049	1052	1056	1057	1054	1045	1044	1054
SRS2609377	937	921	1045	1033	1037	1029	1031	1024	1039	1036	1050	1039	1041	1037	1039	1037	1046	1036	1035	1041	1033	1036	1034	1035	1037	1038	1031	1031	1051	1044	1049	1042	1041	1040	1040	1046	1044	1036	1048	1046	1036	1036	1039	1044	1044	1041	1032	1031	1041
SRS3721795	934	918	1047	1035	1041	1033	1035	1028	1040	1034	1051	1042	1042	1038	1040	1038	1047	1037	1036	1042	1034	1037	1035	1036	1038	1039	1032	1032	1051	1047	1050	1043	1042	1041	1041	1047	1045	1037	1049	1047	1037	1037	1040	1045	1045	1042	1033	1032	1042
SRS3871596	931	915	1043	1031	1037	1029	1031	1024	1039	1032	1050	1038	1041	1036	1038	1036	1046	1035	1035	1040	1032	1035	1033	1034	1036	1037	1030	1030	1049	1043	1048	1041	1040	1039	1040	1046	1043	1036	1047	1045	1035	1035	1039	1043	1044	1040	1032	1031	1040
SRS3950101	931	915	1043	1031	1037	1029	1031	1024	1039	1032	1050	1038	1041	1036	1038	1036	1046	1035	1035	1040	1032	1035	1033	1034	1036	1037	1030	1030	1049	1043	1048	1041	1040	1039	1040	1046	1043	1036	1047	1045	1035	1035	1039	1043	1044	1040	1032	1031	1040
SRS3623378	932	915	1042	1031	1036	1028	1030	1023	1037	1032	1049	1038	1040	1036	1038	1036	1045	1035	1035	1040	1032	1035	1033	1034	1036	1037	1031	1030	1049	1043	1048	1041	1040	1039	1039	1045	1043	1035	1046	1046	1035	1035	1038	1043	1043	1040	1031	1030	1039
SRS2420915	930	914	1039	1027	1033	1025	1027	1020	1035	1031	1046	1034	1037	1032	1034	1032	1042	1031	1031	1036	1028	1031	1029	1030	1032	1033	1026	1026	1045	1039	1044	1037	1036	1035	1036	1042	1039	1032	1043	1041	1031	1031	1035	1039	1040	1036	1028	1027	1036
SRS2695323	931	916	1045	1033	1040	1031	1034	1027	1042	1033	1053	1039	1044	1039	1039	1037	1048	1035	1038	1041	1033	1037	1035	1034	1037	1038	1032	1033	1051	1043	1048	1041	1041	1040	1042	1048	1044	1039	1048	1046	1038	1035	1039	1046	1047	1042	1033	1032	1040
SRS2850289	930	911	1041	1029	1032	1024	1026	1019	1034	1031	1048	1037	1039	1035	1037	1035	1044	1034	1033	1039	1031	1034	1032	1033	1035	1036	1029	1029	1048	1042	1047	1040	1039	1038	1038	1044	1042	1034	1043	1044	1034	1034	1034	1040	1040	1039	1030	1029	1035
SRS3010019	927	911	1036	1024	1030	1022	1024	1017	1032	1028	1043	1031	1034	1029	1031	1029	1039	1028	1028	1033	1025	1028	1026	1027	1029	1030	1023	1023	1042	1036	1041	1034	1033	1032	1033	1039	1036	1029	1040	1038	1028	1028	1032	1036	1037	1033	1025	1024	1033
SRS2420931	924	908	1032	1020	1024	1016	1018	1011	1026	1023	1037	1026	1028	1024	1026	1024	1033	1023	1022	1028	1020	1023	1021	1022	1024	1025	1018	1018	1038	1031	1036	1029	1028	1027	1027	1033	1031	1023	1035	1033	1023	1023	1026	1031	1031	1028	1019	1018	1028
SRS3877801	929	913	1041	1029	1033	1025	1027	1020	1034	1028	1045	1034	1036	1032	1034	1032	1041	1031	1030	1036	1028	1031	1029	1030	1032	1033	1026	1026	1046	1039	1044	1037	1036	1035	1035	1041	1039	1031	1043	1041	1031	1031	1034	1039	1039	1036	1027	1026	1036
SRS2926162	924	908	1033	1021	1026	1018	1020	1013	1027	1024	1038	1027	1029	1025	1027	1025	1034	1024	1023	1029	1021	1024	1022	1023	1025	1026	1019	1019	1038	1032	1037	1030	1029	1028	1028	1034	1032	1024	1035	1034	1024	1024	1027	1032	1032	1029	1020	1019	1029
SRS3643408	925	909	1033	1021	1027	1019	1021	1014	1029	1025	1040	1028	1031	1026	1028	1026	1036	1025	1025	1030	1022	1025	1023	1024	1026	1027	1020	1020	1039	1033	1038	1031	1030	1029	1030	1036	1033	1026	1037	1035	1025	1025	1029	1033	1034	1030	1022	1021	1030
SRS3876542	934	918	1046	1034	1040	1032	1034	1027	1042	1036	1053	1042	1044	1040	1042	1040	1049	1039	1038	1044	1036	1039	1037	1038	1040	1041	1034	1034	1053	1047	1052	1045	1044	1043	1043	1049	1047	1039	1050	1049	1039	1039	1042	1047	1047	1044	1035	1034	1044
SRS2998913	928	912	1040	1028	1032	1024	1026	1019	1034	1027	1045	1033	1036	1031	1033	1031	1041	1030	1030	1035	1027	1030	1028	1029	1031	1032	1025	1025	1045	1038	1043	1036	1035	1034	1035	1041	1038	1031	1041	1040	1030	1030	1034	1038	1039	1035	1027	1026	1035
SRS3871610	934	917	1045	1033	1038	1030	1032	1025	1040	1033	1051	1039	1042	1037	1039	1037	1047	1036	1036	1041	1033	1036	1034	1035	1037	1038	1030	1031	1050	1044	1049	1042	1041	1040	1041	1047	1044	1037	1048	1046	1036	1036	1040	1044	1044	1041	1033	1032	1041
SRS3021992	932	915	1042	1030	1036	1028	1030	1023	1039	1032	1050	1038	1041	1036	1038	1036	1046	1035	1035	1040	1032	1035	1033	1034	1036	1037	1029	1030	1049	1043	1048	1041	1040	1039	1040	1046	1043	1036	1047	1045	1035	1035	1039	1043	1043	1040	1032	1031	1040
SRS3975507	931	914	1043	1031	1035	1027	1029	1022	1036	1027	1047	1033	1038	1034	1033	1031	1041	1030	1032	1035	1027	1033	1031	1029	1031	1033	1025	1028	1048	1038	1043	1036	1035	1034	1035	1041	1038	1033	1042	1040	1033	1030	1033	1041	1040	1038	1026	1025	1035
SRS2961449	928	911	1038	1026	1028	1020	1022	1015	1030	1024	1041	1029	1033	1027	1029	1027	1037	1026	1025	1031	1022	1026	1024	1025	1027	1028	1020	1021	1042	1035	1040	1033	1032	1031	1032	1038	1035	1028	1039	1037	1027	1028	1031	1035	1035	1032	1024	1023	1032
SRS3643364	930	913	1040	1028	1032	1024	1026	1019	1032	1026	1043	1032	1034	1030	1032	1030	1039	1029	1028	1034	1026	1029	1027	1028	1030	1031	1023	1024	1044	1037	1042	1035	1034	1033	1034	1039	1037	1029	1041	1040	1030	1030	1032	1037	1036	1034	1025	1024	1033
SRS3721793	927	910	1036	1024	1030	1022	1024	1017	1030	1024	1042	1030	1033	1028	1030	1028	1038	1027	1027	1032	1024	1027	1025	1026	1028	1029	1021	1022	1041	1035	1040	1033	1032	1031	1033	1038	1035	1028	1039	1038	1028	1028	1031	1035	1035	1032	1024	1023	1032
SRS3877812	929	912	1040	1028	1034	1026	1028	1021	1036	1029	1047	1035	1038	1033	1035	1033	1043	1032	1032	1037	1029	1032	1030	1031	1033	1034	1026	1027	1046	1040	1045	1038	1037	1036	1037	1043	1040	1033	1044	1042	1032	1032	1036	1040	1040	1037	1029	1028	1037
SRS2609380	927	910	1035	1023	1029	1021	1023	1016	1031	1027	1042	1030	1033	1028	1030	1028	1038	1027	1027	1032	1024	1027	1025	1026	1028	1029	1021	1022	1041	1035	1040	1033	1032	1031	1032	1038	1035	1028	1039	1037	1027	1027	1031	1035	1035	1032	1024	1023	1032
SRS3080188	928	912	1037	1025	1031	1023	1025	1018	1033	1029	1044	1032	1035	1030	1032	1030	1040	1029	1029	1034	1026	1029	1027	1028	1030	1031	1024	1024	1043	1037	1042	1035	1034	1033	1034	1040	1037	1030	1041	1039	1029	1029	1033	1037	1038	1034	1026	1025	1034
SRS3643397	920	904	1032	1020	1024	1016	1018	1011	1026	1016	1037	1022	1029	1023	1022	1020	1031	1019	1022	1025	1016	1022	1020	1018	1020	1022	1015	1017	1037	1027	1032	1025	1024	1023	1025	1031	1027	1023	1031	1029	1022	1020	1023	1030	1031	1027	1016	1015	1024
SRS3597673	921	905	1033	1021	1027	1019	1021	1014	1029	1022	1040	1028	1031	1026	1028	1026	1036	1025	1025	1030	1022	1025	1023	1024	1026	1027	1020	1020	1039	1033	1038	1031	1030	1029	1030	1036	1033	1026	1037	1035	1025	1025	1029	1033	1034	1030	1022	1021	1030
SRS3932734	920	904	1032	1020	1026	1018	1020	1013	1028	1019	1039	1025	1030	1025	1025	1023	1034	1022	1024	1027	1019	1024	1022	1021	1023	1025	1018	1019	1038	1030	1035	1028	1027	1026	1028	1034	1030	1025	1034	1032	1024	1022	1026	1032	1033	1029	1019	1018	1027
SRS3021995	917	901	1029	1017	1023	1015	1017	1010	1025	1018	1036	1024	1027	1022	1024	1022	1032	1021	1021	1026	1018	1021	1019	1020	1022	1023	1016	1016	1035	1029	1034	1027	1026	1025	1026	1032	1029	1022	1033	1031	1021	1021	1025	1029	1030	1026	1018	1017	1026
SRS2938638	930	914	1040	1028	1035	1026	1028	1022	1037	1030	1048	1036	1039	1034	1036	1034	1043	1032	1033	1038	1029	1032	1031	1032	1034	1035	1028	1027	1046	1040	1046	1039	1037	1037	1038	1043	1041	1033	1044	1042	1033	1033	1036	1041	1041	1038	1030	1029	1038
SRS3703468	930	914	1040	1028	1033	1024	1026	1020	1036	1029	1047	1035	1038	1033	1035	1033	1042	1031	1032	1037	1028	1031	1030	1031	1033	1034	1027	1026	1046	1039	1045	1038	1036	1036	1037	1042	1040	1032	1043	1041	1031	1031	1035	1040	1040	1037	1029	1028	1037
SRS2609378	928	912	1036	1024	1029	1020	1022	1016	1031	1027	1042	1030	1033	1028	1030	1028	1037	1026	1027	1032	1023	1026	1025	1026	1028	1029	1022	1021	1041	1034	1040	1033	1031	1031	1032	1037	1035	1027	1038	1036	1026	1026	1030	1035	1035	1032	1024	1023	1032
SRS3737739	926	910	1036	1024	1031	1022	1024	1018	1034	1027	1045	1033	1036	1031	1033	1031	1040	1029	1030	1035	1026	1029	1028	1029	1031	1032	1025	1024	1043	1037	1043	1036	1034	1034	1035	1040	1038	1030	1041	1039	1029	1029	1033	1038	1038	1035	1027	1026	1035
SRS3753120	924	908	1035	1023	1030	1021	1023	1017	1032	1025	1043	1031	1034	1029	1031	1029	1038	1027	1028	1033	1024	1027	1026	1027	1029	1030	1023	1022	1041	1035	1041	1034	1032	1032	1033	1038	1036	1028	1039	1037	1027	1027	1031	1036	1036	1033	1025	1024	1033
SRS2609382	922	906	1030	1018	1025	1016	1018	1012	1027	1023	1038	1026	1029	1024	1026	1024	1033	1022	1023	1028	1019	1022	1021	1022	1024	1025	1018	1017	1036	1030	1036	1029	1027	1027	1028	1033	1031	1023	1034	1032	1022	1022	1026	1031	1031	1028	1020	1019	1028
SRS3277971	929	913	1041	1029	1035	1027	1029	1022	1037	1030	1048	1036	1039	1034	1036	1034	1044	1033	1033	1038	1030	1033	1031	1032	1034	1035	1028	1028	1047	1041	1046	1039	1038	1037	1038	1044	1041	1033	1045	1043	1033	1032	1037	1041	1042	1038	1030	1029	1038
SRS3676310	924	908	1035	1023	1030	1021	1023	1017	1032	1023	1043	1029	1034	1029	1029	1027	1037	1025	1028	1031	1022	1027	1026	1025	1027	1029	1022	1022	1041	1033	1039	1032	1030	1030	1032	1037	1034	1028	1037	1035	1027	1025	1029	1036	1036	1033	1023	1022	1031
SRS2532115	925	909	1033	1021	1028	1020	1022	1015	1029	1025	1040	1028	1031	1026	1028	1026	1036	1025	1025	1030	1022	1025	1023	1024	1026	1027	1020	1020	1039	1033	1038	1031	1030	1029	1030	1036	1033	1025	1037	1035	1025	1023	1029	1033	1033	1030	1022	1021	1030
SRS2660207	923	907	1032	1019	1022	1014	1016	1009	1025	1022	1036	1023	1026	1021	1023	1021	1031	1021	1020	1025	1018	1020	1019	1020	1021	1023	1015	1015	1035	1029	1034	1027	1027	1026	1026	1032	1029	1022	1032	1031	1021	1020	1026	1028	1029	1026	1019	1018	1027
SRS3944382	925	909	1035	1023	1026	1018	1020	1013	1030	1024	1041	1030	1032	1028	1029	1028	1037	1027	1027	1031	1024	1026	1024	1026	1028	1028	1022	1021	1042	1035	1039	1033	1032	1031	1031	1037	1035	1026	1038	1036	1026	1025	1030	1034	1035	1031	1024	1023	1032
SRS2938625	924	905	1035	1023	1026	1018	1020	1013	1029	1025	1043	1031	1034	1029	1031	1029	1039	1028	1028	1033	1025	1028	1026	1027	1029	1030	1023	1023	1042	1036	1041	1034	1033	1032	1033	1039	1036	1028	1037	1038	1028	1027	1029	1034	1035	1033	1025	1024	1029
SRS3623430	922	906	1033	1021	1022	1014	1016	1012	1027	1021	1035	1027	1026	1025	1026	1025	1031	1024	1024	1025	1021	1020	1018	1023	1025	1022	1019	1018	1039	1032	1033	1030	1029	1028	1028	1031	1032	1023	1032	1032	1021	1022	1024	1028	1029	1025	1021	1020	1029
SRS3242649	922	906	1035	1023	1029	1021	1023	1016	1030	1024	1041	1030	1032	1028	1030	1028	1037	1027	1026	1032	1024	1027	1025	1026	1028	1029	1022	1022	1041	1035	1040	1033	1032	1031	1031	1037	1035	1026	1039	1037	1027	1026	1030	1035	1035	1032	1023	1022	1031
SRS2845135	923	907	1031	1019	1025	1017	1019	1012	1029	1024	1040	1028	1031	1026	1028	1026	1036	1025	1025	1030	1022	1025	1023	1024	1026	1027	1020	1020	1039	1033	1038	1031	1030	1029	1030	1036	1033	1025	1037	1035	1025	1024	1029	1033	1034	1030	1022	1021	1030
SRS3721796	921	905	1033	1021	1022	1014	1016	1012	1027	1018	1035	1024	1026	1024	1024	1022	1030	1021	1023	1023	1018	1020	1018	1020	1022	1021	1017	1018	1038	1029	1031	1027	1026	1025	1026	1030	1029	1023	1030	1029	1021	1020	1022	1028	1029	1025	1018	1017	1026
SRS3799118	922	905	1030	1018	1012	1007	1006	1005	1023	1021	1029	1021	1020	1022	1023	1022	1025	1021	1020	1021	1018	1017	1015	1020	1022	1019	1016	1015	1033	1029	1030	1027	1023	1025	1021	1025	1026	1017	1025	1025	1018	1018	1020	1022	1023	1019	1018	1017	1022
SRS2761300	930	913	1037	1025	1028	1020	1022	1015	1033	1027	1045	1030	1036	1031	1030	1028	1039	1027	1030	1032	1023	1030	1028	1026	1028	1030	1023	1025	1044	1035	1040	1033	1032	1031	1033	1039	1035	1031	1038	1037	1030	1027	1030	1038	1039	1034	1024	1023	1028
SRS2998834	809	791	908	895	899	890	894	884	904	904	918	905	910	903	904	903	912	902	903	909	898	902	901	900	904	904	897	897	917	910	913	909	907	906	908	912	910	903	911	913	903	903	903	907	910	906	900	898	903
SRS2442415	939	921	1041	1030	1011	1007	1006	1005	1026	1034	1028	1020	1019	1023	1027	1025	1024	1022	1023	1023	1025	1020	1018	1021	1022	1020	1018	1016	1032	1030	1030	1027	1022	1029	1021	1024	1025	1019	1021	1027	1019	1019	1022	1017	1018	1019	1019	1021	1022
SRS2547178	1059	1043	1147	1139	1134	1130	1127	1128	1152	1152	1154	1145	1145	1146	1148	1147	1149	1146	1147	1149	1144	1145	1144	1144	1147	1145	1141	1140	1157	1155	1155	1152	1148	1154	1147	1150	1150	1144	1148	1153	1145	1146	1147	1145	1147	1143	1144	1146	1149
SRS2628542	1291	1280	1394	1381	1369	1364	1364	1361	1390	1387	1389	1380	1380	1383	1388	1387	1383	1382	1383	1384	1384	1380	1379	1380	1383	1380	1376	1376	1392	1390	1388	1388	1381	1389	1381	1383	1385	1379	1382	1387	1380	1378	1383	1379	1382	1377	1380	1381	1383
SRS2655760	1000	983	1094	1085	1089	1080	1084	1074	1096	1093	1109	1096	1100	1094	1095	1094	1103	1093	1097	1101	1091	1095	1094	1091	1095	1095	1089	1088	1109	1099	1104	1100	1098	1097	1100	1103	1101	1094	1102	1106	1094	1093	1096	1099	1102	1097	1091	1089	1093
SRS2709963	1261	1248	1358	1344	1348	1339	1342	1333	1355	1357	1371	1358	1362	1356	1357	1356	1365	1355	1358	1363	1353	1357	1356	1353	1357	1357	1348	1350	1370	1363	1366	1362	1359	1359	1362	1365	1363	1356	1362	1367	1356	1355	1355	1359	1362	1358	1352	1351	1353
min	0
max	1427
avg	645.346
median	1015
[truncated: 62 more columns]

## Sheet: B
	SRS2628542	SRS2709963	SRS2547178	SRS2655760	SRS2442415	SRS2442409	SRS2822480	SRS3944395	SRS3975519	SRS2998834	SRS2761300	SRS2998855	SRS2609377	SRS3876542	SRS2998913	SRS3871610	SRS3021992	SRS3975507	SRS3877812	SRS3643364	SRS2609380	SRS2961449	SRS3721793	SRS3080188	SRS3643397	SRS3597673	SRS3932734	SRS3021995	SRS3950101	SRS3721795	SRS3871596	SRS2695323	SRS3623378	SRS2420915	SRS2850289	SRS3010019	SRS3877801	SRS2420931	SRS2926162	SRS3643408	SRS2938638	SRS3277971	SRS3703468	SRS2609378	SRS3737739	SRS2938625	SRS3944382	SRS3623430	SRS3242649
SRS2628542	0	1184	1416	1357	1275	1376	1357	1353	1352	1174	1298	1317	1305	1301	1299	1301	1301	1300	1297	1295	1295	1292	1293	1296	1291	1290	1288	1286	1301	1300	1298	1299	1297	1299	1295	1296	1293	1294	1293	1291	1298	1297	1297	1296	1293	1294	1296	1294	1291
SRS2709963	1184	0	1383	1325	1243	1352	1334	1328	1328	1150	1270	1290	1280	1274	1272	1276	1276	1274	1272	1271	1270	1271	1272	1270	1264	1263	1262	1260	1274	1274	1273	1273	1270	1271	1270	1270	1268	1268	1267	1265	1271	1270	1269	1268	1266	1268	1269	1266	1264
SRS2547178	1416	1383	0	680	1035	1142	1124	1118	1118	929	1058	1076	1066	1061	1059	1062	1061	1061	1057	1055	1055	1057	1055	1057	1051	1050	1048	1047	1061	1059	1059	1059	1056	1060	1057	1056	1053	1054	1053	1052	1057	1057	1053	1055	1053	1054	1055	1053	1051
SRS2655760	1357	1325	680	0	976	1080	1062	1056	1057	872	995	1014	1003	997	995	999	998	996	994	994	993	993	992	994	988	986	984	984	999	997	996	997	995	996	993	992	990	990	990	989	995	995	991	994	992	994	993	990	989
SRS2442415	1275	1243	1035	976	0	999	982	977	976	792	916	935	925	921	921	921	921	920	920	916	914	914	912	919	910	908	906	907	920	918	917	918	917	918	915	918	913	913	912	910	915	915	915	915	912	913	913	911	910
SRS2442409	1376	1352	1142	1080	999	0	365	361	360	893	1016	1035	1025	1019	1018	1022	1021	1021	1017	1013	1015	1011	1014	1016	1012	1009	1007	1006	1020	1019	1019	1019	1016	1019	1016	1015	1013	1013	1012	1011	1016	1016	1016	1015	1013	1014	1014	1012	1010
SRS2822480	1357	1334	1124	1062	982	365	0	43	41	881	998	1018	1008	1003	1001	1005	1004	1003	1002	999	998	998	998	999	993	991	989	989	1003	1002	1002	1002	1000	1001	998	998	996	996	995	994	999	998	999	998	996	997	997	994	993
SRS3944395	1353	1328	1118	1056	977	361	43	0	2	876	994	1013	1003	999	996	1000	999	999	997	994	993	993	993	994	989	987	984	984	998	997	997	997	995	997	995	993	991	991	990	989	994	993	994	993	991	993	992	990	989
SRS3975519	1352	1328	1118	1057	976	360	41	2	0	873	992	1012	1002	997	995	998	997	996	995	993	991	991	991	993	987	985	983	983	997	996	996	996	994	995	991	992	990	990	989	988	992	991	992	991	989	989	990	987	986
SRS2998834	1174	1150	929	872	792	893	881	876	873	0	350	367	359	356	351	354	353	354	349	352	347	351	349	349	346	342	341	339	352	352	353	352	354	352	346	348	346	346	345	345	350	350	350	348	346	344	347	347	347
SRS2761300	1298	1270	1058	995	916	1016	998	994	992	350	0	136	125	122	118	122	121	121	117	119	115	120	119	116	112	109	107	106	121	119	119	119	120	119	115	114	113	113	112	111	116	116	117	115	113	113	114	113	113
SRS2998855	1317	1290	1076	1014	935	1035	1018	1013	1012	367	136	0	43	80	76	84	83	83	79	81	77	82	81	77	73	71	69	68	21	36	37	38	40	39	37	34	30	33	32	31	78	78	78	77	74	77	75	75	75
SRS2609377	1305	1280	1066	1003	925	1025	1008	1003	1002	359	125	43	0	69	65	73	72	72	68	70	66	71	70	67	64	60	58	57	28	20	26	28	29	28	26	23	20	22	21	20	67	67	68	66	64	66	65	64	64
SRS3876542	1301	1274	1061	997	921	1019	1003	999	997	356	122	80	69	0	3	70	67	69	65	67	63	68	67	64	61	57	55	54	65	63	63	63	64	63	60	58	57	57	56	55	63	62	64	62	60	62	59	60	60
SRS2998913	1299	1272	1059	995	921	1018	1001	996	995	351	118	76	65	3	0	66	64	65	61	63	59	64	63	60	57	53	51	50	61	59	59	59	60	59	57	54	53	53	52	51	60	60	61	59	57	59	57	57	57
SRS3871610	1301	1276	1062	999	921	1022	1005	1000	998	354	122	84	73	70	66	0	17	17	13	15	11	16	15	52	49	45	43	42	69	67	67	67	68	67	65	62	61	61	60	59	64	64	65	63	61	63	62	61	61
SRS3021992	1301	1276	1061	998	921	1021	1004	999	997	353	121	83	72	67	64	17	0	16	12	14	10	15	14	51	48	44	42	41	68	66	66	66	67	66	64	61	60	60	59	58	63	62	64	62	60	62	59	60	60
SRS3975507	1300	1274	1061	996	920	1021	1003	999	996	354	121	83	72	69	65	17	16	0	10	12	8	13	12	51	48	44	42	41	68	66	66	66	67	66	64	61	60	60	59	58	63	63	64	62	60	62	61	60	60
SRS3877812	1297	1272	1057	994	920	1017	1002	997	995	349	117	79	68	65	61	13	12	10	0	8	4	9	8	47	44	40	38	37	64	62	62	62	63	62	60	57	56	56	55	54	59	59	60	58	56	58	57	56	56
SRS3643364	1295	1271	1055	994	916	1013	999	994	993	352	119	81	70	67	63	15	14	12	8	0	6	11	10	49	46	42	40	39	66	64	64	64	65	64	61	59	58	58	57	56	61	61	62	60	58	60	59	58	58
SRS2609380	1295	1270	1055	993	914	1015	998	993	991	347	115	77	66	63	59	11	10	8	4	6	0	7	6	45	42	38	36	35	62	60	60	60	61	60	58	55	54	54	53	52	57	57	58	56	54	56	55	54	54
SRS2961449	1292	1271	1057	993	914	1011	998	993	991	351	120	82	71	68	64	16	15	13	9	11	7	0	8	50	47	43	40	40	67	65	65	65	66	65	63	60	59	59	58	57	62	62	62	60	58	61	60	59	59
SRS3721793	1293	1272	1055	992	912	1014	998	993	991	349	119	81	70	67	63	15	14	12	8	10	6	8	0	49	46	42	40	39	66	64	64	64	65	64	61	59	58	58	57	56	61	61	61	59	57	60	59	58	58
SRS3080188	1296	1270	1057	994	919	1016	999	994	993	349	116	77	67	64	60	52	51	51	47	49	45	50	49	0	15	17	15	14	62	61	61	61	62	61	59	56	55	55	54	53	58	58	59	57	55	57	56	55	55
SRS3643397	1291	1264	1051	988	910	1012	993	989	987	346	112	73	64	61	57	49	48	48	44	46	42	47	46	15	0	14	12	11	58	58	58	58	59	58	56	53	52	52	51	50	55	55	56	54	52	54	53	52	52
SRS3597673	1290	1263	1050	986	908	1009	991	987	985	342	109	71	60	57	53	45	44	44	40	42	38	43	42	17	14	0	6	5	56	54	54	54	55	54	52	49	48	48	47	46	51	51	52	50	48	50	49	48	48
SRS3932734	1288	1262	1048	984	906	1007	989	984	983	341	107	69	58	55	51	43	42	42	38	40	36	40	40	15	12	6	0	1	54	52	52	52	53	52	50	47	46	46	45	44	49	49	50	48	46	48	47	46	46
SRS3021995	1286	1260	1047	984	907	1006	989	984	983	339	106	68	57	54	50	42	41	41	37	39	35	40	39	14	11	5	1	0	53	51	51	51	52	51	49	46	45	45	44	43	48	48	49	47	45	47	46	45	45
SRS3950101	1301	1274	1061	999	920	1020	1003	998	997	352	121	21	28	65	61	69	68	68	64	66	62	67	66	62	58	56	54	53	0	21	22	23	25	24	22	19	15	18	17	16	63	63	63	62	59	62	60	60	60
SRS3721795	1300	1274	1059	997	918	1019	1002	997	996	352	119	36	20	63	59	67	66	66	62	64	60	65	64	61	58	54	52	51	21	0	20	22	23	22	20	17	14	16	15	14	61	61	62	60	58	60	59	58	58
SRS3871596	1298	1273	1059	996	917	1019	1002	997	996	353	119	37	26	63	59	67	66	66	62	64	60	65	64	61	58	54	52	51	22	20	0	22	23	22	20	17	14	16	15	14	61	61	62	60	58	60	59	58	58
SRS2695323	1299	1273	1059	997	918	1019	1002	997	996	352	119	38	28	63	59	67	66	66	62	64	60	65	64	61	58	54	52	51	23	22	22	0	23	22	20	17	16	16	15	14	61	61	62	60	58	60	59	58	58
SRS3623378	1297	1270	1056	995	917	1016	1000	995	994	354	120	40	29	64	60	68	67	67	63	65	61	66	65	62	59	55	53	52	25	23	23	23	0	9	21	18	17	17	16	15	62	62	63	61	59	61	60	59	59
SRS2420915	1299	1271	1060	996	918	1019	1001	997	995	352	119	39	28	63	59	67	66	66	62	64	60	65	64	61	58	54	52	51	24	22	22	22	9	0	20	17	16	16	15	14	61	61	62	60	58	60	59	58	58
SRS2850289	1295	1270	1057	993	915	1016	998	995	991	346	115	37	26	60	57	65	64	64	60	61	58	63	61	59	56	52	50	49	22	20	20	20	21	20	0	15	14	14	13	12	59	59	60	58	56	54	57	56	56
SRS3010019	1296	1270	1056	992	918	1015	998	993	992	348	114	34	23	58	54	62	61	61	57	59	55	60	59	56	53	49	47	46	19	17	17	17	18	17	15	0	11	11	10	9	56	56	57	55	53	55	54	53	53
SRS3877801	1293	1268	1053	990	913	1013	996	991	990	346	113	30	20	57	53	61	60	60	56	58	54	59	58	55	52	48	46	45	15	14	14	16	17	16	14	11	0	10	9	8	55	55	56	54	52	54	53	52	52
SRS2420931	1294	1268	1054	990	913	1013	996	991	990	346	113	33	22	57	53	61	60	60	56	58	54	59	58	55	52	48	46	45	18	16	16	16	17	16	14	11	10	0	9	8	55	55	56	54	52	54	53	52	52
SRS2926162	1293	1267	1053	990	912	1012	995	990	989	345	112	32	21	56	52	60	59	59	55	57	53	58	57	54	51	47	45	44	17	15	15	15	16	15	13	10	9	9	0	5	54	54	55	53	51	53	52	51	51
SRS3643408	1291	1265	1052	989	910	1011	994	989	988	345	111	31	20	55	51	59	58	58	54	56	52	57	56	53	50	46	44	43	16	14	14	14	15	14	12	9	8	8	5	0	53	53	54	52	50	52	51	50	50
SRS2938638	1298	1271	1057	995	915	1016	999	994	992	350	116	78	67	63	60	64	63	63	59	61	57	62	61	58	55	51	49	48	63	61	61	61	62	61	59	56	55	55	54	53	0	32	29	27	25	31	30	29	29
SRS3277971	1297	1270	1057	995	915	1016	998	993	991	350	116	78	67	62	60	64	62	63	59	61	57	62	61	58	55	51	49	48	63	61	61	61	62	61	59	56	55	55	54	53	32	0	33	31	29	31	29	29	29
SRS3703468	1297	1269	1053	991	915	1016	999	994	992	350	117	78	68	64	61	65	64	64	60	62	58	62	61	59	56	52	50	49	63	62	62	62	63	62	60	57	56	56	55	54	29	33	0	18	16	32	31	30	30
SRS2609378	1296	1268	1055	994	915	1015	998	993	991	348	115	77	66	62	59	63	62	62	58	60	56	60	59	57	54	50	48	47	62	60	60	60	61	60	58	55	54	54	53	52	27	31	18	0	8	30	29	28	28
SRS3737739	1293	1266	1053	992	912	1013	996	991	989	346	113	74	64	60	57	61	60	60	56	58	54	58	57	55	52	48	46	45	59	58	58	58	59	58	56	53	52	52	51	50	25	29	16	8	0	28	27	26	26
SRS2938625	1294	1268	1054	994	913	1014	997	993	989	344	113	77	66	62	59	63	62	62	58	60	56	61	60	57	54	50	48	47	62	60	60	60	61	60	54	55	54	54	53	52	31	31	32	30	28	0	19	8	8
SRS3944382	1296	1269	1055	993	913	1014	997	992	990	347	114	75	65	59	57	62	59	61	57	59	55	60	59	56	53	49	47	46	60	59	59	59	60	59	57	54	53	53	52	51	30	29	31	29	27	19	0	17	17
SRS3623430	1294	1266	1053	990	911	1012	994	990	987	347	113	75	64	60	57	61	60	60	56	58	54	59	58	55	52	48	46	45	60	58	58	58	59	58	56	53	52	52	51	50	29	29	30	28	26	8	17	0	0
SRS3242649	1291	1264	1051	989	910	1010	993	989	986	347	113	75	64	60	57	61	60	60	56	58	54	59	58	55	52	48	46	45	60	58	58	58	59	58	56	53	52	52	51	50	29	29	30	28	26	8	17	0	0
SRS3799118	1293	1265	1051	990	909	1010	994	989	987	342	111	73	62	58	55	59	58	58	54	56	52	57	56	53	50	46	44	43	58	56	56	56	57	56	52	51	50	50	49	48	27	27	28	26	24	4	15	4	4
SRS2845135	1292	1265	1050	989	910	1010	993	988	986	343	110	72	61	55	53	58	55	57	53	55	51	56	55	52	49	45	43	42	57	55	55	55	56	55	53	50	49	49	48	47	26	25	27	25	23	15	12	13	13
SRS3721796	1289	1262	1049	987	907	1008	991	986	984	342	108	70	59	55	52	56	55	55	51	53	49	54	53	50	47	43	41	40	55	53	53	53	54	53	51	48	47	47	46	45	24	24	25	23	21	13	12	11	11
SRS2532115	1294	1267	1053	990	912	1012	994	990	987	346	113	74	64	59	57	61	60	60	56	58	54	59	58	55	52	48	46	45	59	58	58	58	58	58	56	53	52	52	51	50	29	25	30	28	26	28	27	26	26
SRS3676310	1293	1265	1053	991	911	1012	995	990	988	346	112	74	63	59	56	60	59	59	55	57	53	58	57	54	51	47	45	44	59	57	57	57	58	57	55	52	51	51	50	49	24	28	25	23	21	27	26	25	25
SRS2660207	1292	1265	1052	990	911	1011	994	989	987	345	111	73	62	58	55	59	58	58	54	56	52	57	56	53	50	46	44	43	58	56	56	56	57	56	54	51	50	50	49	48	27	27	28	26	24	24	23	22	22
SRS2609382	1292	1264	1052	990	910	1011	996	991	989	344	111	72	62	58	55	59	58	58	54	56	52	56	55	53	50	46	44	43	57	56	56	56	57	56	54	51	50	50	49	48	23	27	14	12	10	26	25	24	24
SRS3753120	1293	1264	1051	990	911	1012	994	990	987	345	112	73	63	59	56	60	59	59	55	57	53	57	56	54	51	47	45	44	58	57	57	57	58	57	55	52	51	51	50	49	24	28	15	9	7	27	26	25	25
SRS2850296	1272	1244	1047	988	908	998	983	978	976	809	925	945	934	927	925	930	928	929	928	927	924	923	923	924	918	917	915	914	929	927	926	926	926	926	924	924	921	923	921	919	927	924	926	925	924	925	923	922	920
SRS2628553	1255	1229	1030	970	890	981	965	961	958	786	907	926	915	911	907	910	910	910	908	907	904	903	903	905	900	899	896	895	910	908	907	907	907	908	904	905	902	904	902	900	906	904	905	904	903	902	904	902	900
SRS2783476	1357	1331	1130	1073	995	1088	1073	1068	1067	895	1014	1032	1023	1019	1014	1017	1017	1017	1015	1014	1011	1010	1008	1012	1007	1005	1004	1002	1016	1016	1015	1015	1014	1014	1012	1013	1009	1010	1009	1007	1016	1014	1014	1013	1012	1014	1013	1010	1010
SRS2998869	1343	1316	1118	1062	981	1077	1060	1055	1054	881	999	1018	1009	1005	1000	1003	1003	1003	1001	1000	997	996	994	998	993	991	990	988	1002	1002	1001	1001	1001	1000	998	999	995	996	995	993	1002	1000	1000	999	998	1000	999	996	996
SRS2895509	1336	1305	1111	1053	970	1066	1047	1042	1040	869	990	1008	999	996	990	993	993	994	991	990	987	984	984	988	984	982	980	978	992	992	991	991	990	991	989	989	985	986	985	983	991	989	989	988	987	988	988	987	986
SRS3384774	1332	1300	1105	1050	966	1062	1044	1039	1037	866	986	1004	995	992	986	989	989	990	987	986	983	980	980	984	979	978	976	974	988	988	987	987	986	987	985	985	981	982	981	979	987	985	985	984	983	984	984	983	982
SRS3453943	1332	1301	1107	1049	966	1062	1043	1038	1036	865	986	1004	995	992	986	989	989	990	987	986	983	980	980	984	980	978	976	974	988	988	987	987	986	987	985	985	981	982	981	979	987	985	985	984	983	984	984	983	982
SRS2998847	1330	1301	1106	1047	965	1061	1041	1036	1034	863	986	1004	995	992	986	989	989	989	987	984	983	979	979	984	979	977	976	974	988	988	987	987	986	987	985	985	981	982	981	977	987	984	984	984	983	983	984	983	982
SRS3708648	1346	1318	1125	1064	983	1077	1060	1055	1054	881	1000	1020	1011	1007	1002	1005	1005	1005	1003	1001	999	996	994	1000	993	993	992	990	1004	1004	1004	1003	1002	1002	999	1001	998	998	997	995	1002	1001	1001	1000	999	999	1000	998	997
SRS2547237	1337	1310	1116	1055	976	1069	1052	1047	1046	874	991	1012	1004	999	998	997	998	997	999	993	991	989	987	996	985	985	984	984	996	996	996	995	994	994	992	997	992	991	990	987	994	993	993	993	991	992	992	990	989
SRS3643394	1346	1319	1124	1063	984	1078	1059	1055	1053	881	1000	1019	1011	1007	1005	1004	1005	1005	1006	1000	998	995	994	1003	994	993	991	991	1003	1003	1003	1002	1001	1002	1000	1004	999	998	997	994	1001	1000	1000	1000	998	999	999	998	997
SRS3871678	1341	1314	1120	1059	980	1073	1055	1050	1049	878	995	1016	1008	1003	1002	1001	1002	1001	1003	997	995	992	991	1000	989	989	988	988	1000	1000	1000	999	998	998	996	1001	996	995	994	991	998	997	997	997	995	996	996	994	993
SRS3721753	1340	1313	1119	1058	979	1072	1054	1049	1048	877	994	1015	1007	1002	1001	1000	1001	1000	1002	996	994	991	990	999	988	988	987	987	999	999	999	998	997	997	995	1000	995	994	993	990	997	996	996	996	994	995	995	993	992
SRS2761294	1339	1312	1118	1057	978	1071	1053	1048	1047	876	993	1014	1006	1001	1000	999	1000	999	1001	995	993	990	989	998	987	987	986	986	998	998	998	997	996	996	994	999	994	993	992	989	996	995	995	995	993	994	994	992	991
SRS3080280	1339	1312	1118	1057	980	1071	1053	1048	1047	876	993	1013	1004	1000	995	998	998	998	996	994	992	989	988	993	986	986	985	983	997	997	997	996	995	995	994	994	991	991	990	988	995	994	994	993	992	994	993	991	990
SRS3080274	1338	1311	1117	1056	979	1070	1052	1047	1046	875	992	1012	1003	999	994	997	997	997	995	993	991	988	987	992	985	985	984	982	996	996	996	995	994	994	993	993	990	990	989	987	994	993	993	992	991	993	992	990	989
SRS3471848	1339	1311	1117	1057	978	1068	1050	1045	1044	873	994	1016	1007	1002	1001	1000	1001	1000	1002	996	994	991	990	999	988	988	987	987	1000	999	997	998	997	997	993	1000	993	994	993	990	997	996	996	996	994	995	995	993	992
SRS3531728	1336	1309	1115	1054	975	1068	1050	1046	1044	873	990	1010	1002	998	996	995	996	996	997	991	989	987	985	994	985	984	982	982	994	994	994	993	992	993	991	995	990	989	988	985	992	991	991	991	989	990	990	989	988
SRS3614304	1339	1312	1118	1058	979	1071	1053	1048	1047	874	991	1012	1004	999	998	997	998	997	999	993	991	987	987	996	985	985	984	984	996	996	996	995	995	994	992	997	992	991	990	987	994	993	993	993	991	992	992	990	989
SRS3007164	1338	1311	1117	1056	977	1070	1052	1047	1046	874	990	1011	1003	998	997	996	997	996	998	992	990	987	986	995	985	984	983	983	995	995	995	994	993	993	991	996	991	990	989	986	993	992	992	992	990	991	991	989	988
SRS2660215	1338	1311	1117	1056	977	1070	1052	1047	1046	873	990	1011	1003	998	997	996	997	996	998	992	990	986	986	995	984	984	983	983	995	995	995	994	993	993	991	996	991	990	989	986	993	992	992	992	990	991	991	989	988
SRS3932748	1338	1311	1116	1056	977	1070	1052	1047	1046	873	990	1011	1003	998	997	996	997	996	998	992	990	987	986	995	984	984	983	983	995	995	995	994	993	993	991	996	991	990	989	986	993	992	992	992	990	991	991	989	988
SRS3531727	1337	1310	1115	1055	976	1069	1051	1046	1045	872	989	1010	1002	997	996	995	996	995	997	991	989	986	985	994	983	983	982	982	994	994	994	993	992	992	990	995	990	989	988	985	992	991	991	991	989	990	990	988	987
SRS2609391	1337	1310	1116	1055	976	1069	1051	1046	1045	874	991	1012	1004	999	998	997	998	997	999	993	991	988	987	996	985	985	984	984	996	996	996	995	994	994	992	997	992	991	990	987	994	993	993	993	991	992	992	990	989
SRS2922972	1336	1309	1115	1054	975	1068	1050	1045	1044	873	991	1012	1004	999	998	997	998	997	999	993	991	988	987	996	985	985	984	984	996	996	995	995	994	994	991	997	991	991	990	987	994	993	993	993	991	992	992	990	989
SRS3855333	1336	1309	1115	1054	975	1068	1050	1045	1044	873	990	1011	1003	998	997	996	997	996	998	992	990	987	986	995	984	984	983	983	995	995	995	994	993	993	991	996	991	990	989	986	993	992	992	992	990	991	991	989	988
SRS3643366	1334	1307	1113	1052	973	1066	1048	1043	1042	871	988	1009	1001	996	995	994	995	994	996	990	988	985	984	993	982	982	981	981	993	993	993	992	991	991	989	994	989	988	987	984	991	990	990	990	988	989	989	987	986
SRS3742753	1332	1304	1112	1052	973	1066	1048	1043	1042	870	987	1008	1000	995	994	992	993	992	994	988	986	983	982	992	981	981	980	980	992	992	992	991	991	990	988	993	988	987	986	983	990	989	989	989	987	988	988	986	985
SRS3614303	1352	1325	1131	1070	991	1084	1066	1061	1060	888	1005	1026	1018	1013	1012	1011	1012	1011	1013	1007	1005	1003	1001	1010	999	999	998	998	1010	1010	1010	1009	1008	1008	1006	1011	1006	1005	1004	1001	1008	1007	1007	1007	1005	1006	1006	1004	1003
SRS2420927	1346	1321	1126	1063	985	1079	1061	1056	1055	882	1003	1025	1016	1011	1010	1009	1010	1008	1011	1003	1003	1000	998	1008	996	996	996	996	1009	1008	1007	1007	1006	1006	1003	1009	1003	1003	1002	997	1005	1003	1003	1004	1002	1002	1003	1001	1000
SRS2761182	1345	1318	1124	1063	984	1077	1059	1054	1053	882	999	1020	1012	1007	1006	1005	1006	1005	1007	1001	999	997	995	1004	993	993	992	992	1004	1004	1004	1003	1002	1002	1000	1005	1000	999	998	995	1002	1001	1001	1001	999	1000	1000	998	997
SRS2845130	1344	1317	1123	1062	983	1076	1058	1053	1052	881	998	1019	1011	1006	1005	1004	1005	1004	1006	1000	998	996	994	1003	992	992	991	991	1003	1003	1003	1002	1001	1001	999	1004	999	998	997	994	1001	1000	1000	1000	998	999	999	997	996
SRS2547417	1342	1315	1122	1061	982	1075	1057	1052	1051	880	997	1017	1010	1005	1004	1003	1004	1003	1005	999	997	995	993	1002	991	991	990	990	1002	1002	1002	1001	1000	1000	998	1003	998	997	996	993	1000	999	999	999	997	998	998	996	995
SRS3471904	1342	1312	1119	1060	981	1074	1056	1050	1049	877	996	1016	1010	1003	1004	1001	1004	1001	1005	996	995	993	991	1002	989	989	988	990	1000	1000	1000	999	998	998	997	1003	998	997	996	991	998	997	997	999	995	996	996	994	992
SRS3453937	1342	1312	1119	1060	981	1074	1056	1050	1049	877	996	1016	1010	1003	1004	1001	1004	1001	1005	996	995	993	991	1002	989	989	988	990	1000	1000	1000	999	998	998	997	1003	998	997	996	991	998	997	997	999	995	996	996	994	992
SRS3742747	1340	1311	1117	1059	980	1073	1055	1049	1048	876	995	1015	1009	1002	1003	1000	1003	1000	1004	996	994	992	991	1001	988	988	987	989	999	999	999	998	997	997	996	1002	997	996	995	990	998	996	996	998	994	995	995	993	991
SRS2938622	1342	1311	1119	1060	981	1073	1055	1049	1048	876	995	1015	1009	1002	1003	1000	1003	1000	1004	995	994	992	990	1001	988	988	987	989	999	999	999	998	997	997	996	1002	997	996	995	990	997	996	996	998	994	995	995	993	991
SRS3007170	1342	1312	1119	1060	982	1074	1056	1050	1049	877	996	1016	1010	1003	1004	1001	1004	1001	1005	996	995	993	991	1002	989	989	988	990	1000	1000	1000	999	998	998	997	1003	998	997	996	991	998	997	997	999	995	996	996	994	992
SRS2938662	1338	1309	1116	1055	974	1069	1050	1046	1044	872	991	1011	1001	998	992	995	995	996	993	991	989	987	985	990	985	984	982	980	995	994	994	993	992	993	991	991	988	988	987	985	992	991	991	990	989	990	990	989	988
SRS3932840	1342	1315	1121	1060	981	1074	1056	1051	1050	879	996	1017	1009	1004	1003	1002	1003	1002	1004	998	996	994	992	1001	990	990	989	989	1001	1001	1001	1000	999	999	997	1002	997	996	995	992	999	998	998	998	996	997	997	995	994
SRS2525483	1342	1315	1121	1060	981	1074	1056	1051	1050	879	996	1017	1009	1004	1003	1002	1003	1002	1004	998	996	994	992	1001	990	990	989	989	1001	1001	1001	1000	999	999	997	1002	997	996	995	992	999	998	998	998	996	997	997	995	994
SRS2998915	1340	1314	1120	1059	980	1073	1055	1050	1049	877	994	1015	1007	1002	1001	1000	1001	1000	1002	997	994	992	991	999	988	988	987	987	999	999	999	998	997	997	995	1000	995	994	993	990	997	996	996	996	994	995	995	994	992
SRS3218596	1340	1315	1120	1060	978	1073	1055	1050	1049	874	995	1016	1008	1003	999	1001	1002	1000	1000	996	995	992	990	997	988	988	988	987	1000	1000	1000	999	999	998	994	998	995	995	994	989	998	996	996	997	995	993	996	994	993
SRS3703452	1341	1314	1121	1060	981	1073	1056	1051	1050	877	994	1015	1007	1002	1001	1000	1001	1000	1002	997	994	992	991	999	988	988	987	987	999	999	999	998	998	997	995	1000	995	994	993	990	997	996	996	996	994	995	995	994	992
SRS3871671	1340	1313	1119	1058	979	1072	1054	1049	1048	877	994	1015	1007	1002	1001	1000	1001	1000	1002	997	994	992	991	999	988	988	987	987	999	999	999	998	997	997	995	1000	995	994	993	990	998	996	996	996	994	995	995	993	992
SRS3892739	1342	1315	1121	1060	981	1074	1056	1051	1050	879	996	1017	1009	1004	1003	1002	1003	1002	1004	998	996	994	992	1001	990	990	989	989	1001	1001	1001	1000	999	999	997	1002	997	996	995	992	999	998	998	998	996	997	997	995	994
SRS2938629	1342	1315	1121	1060	981	1074	1056	1051	1050	879	996	1017	1009	1004	1003	1002	1003	1002	1004	998	996	994	992	1001	990	990	989	989	1001	1001	1001	1000	999	999	997	1002	997	996	995	992	998	997	997	997	995	996	996	994	993
SRS3570561	1337	1311	1116	1057	976	1068	1052	1047	1046	874	994	1014	1005	1000	995	999	999	999	997	995	993	991	989	994	987	987	986	984	998	998	998	997	996	996	993	995	992	992	990	989	996	995	995	994	993	993	994	992	991
SRS3703451	1340	1313	1119	1058	977	1072	1054	1049	1048	875	994	1014	1005	1001	996	999	999	999	997	995	993	991	989	994	987	987	986	984	998	998	998	997	996	996	993	995	992	992	991	989	996	995	995	994	993	993	994	992	991
SRS3703470	1337	1310	1117	1056	977	1070	1051	1046	1045	875	992	1013	1005	1000	999	998	999	998	1001	994	992	990	988	997	986	986	985	985	997	997	997	996	995	995	993	998	993	992	991	988	995	994	994	994	992	993	993	991	990
SRS3876540	1338	1310	1117	1056	977	1070	1052	1047	1046	875	992	1013	1005	1000	999	998	999	998	1000	994	992	990	988	997	986	986	985	985	997	997	997	996	995	995	993	998	993	992	991	988	995	994	994	994	992	993	993	991	990
SRS2998873	1340	1312	1118	1058	976	1069	1054	1049	1048	874	994	1014	1005	1001	996	998	998	998	996	994	992	990	988	994	987	987	986	984	998	998	998	997	996	996	993	995	992	992	991	989	996	995	995	994	993	993	994	992	991
SRS3877810	1336	1309	1115	1054	975	1068	1050	1045	1044	874	990	1011	1003	998	997	996	997	996	998	993	990	989	987	995	985	984	983	983	995	995	995	994	993	993	991	996	991	990	989	986	993	991	991	991	989	990	990	988	987
SRS2628565	1336	1309	1115	1054	975	1068	1050	1045	1044	873	990	1011	1003	998	997	996	997	996	998	992	990	988	986	995	984	984	983	983	995	995	995	994	993	993	991	996	991	990	989	986	993	992	992	992	990	991	991	989	988
min	0
max	1416
avg	627.514
[truncated: 62 more columns]

## Sheet: B2
	SRS2850296	SRS2628553	SRS2783476	SRS2998869	SRS2895509	SRS3384774	SRS3453943	SRS2998847	SRS3708648	SRS2547237	SRS3643394	SRS3871678	SRS3721753	SRS2761294	SRS3080280	SRS3080274	SRS3471848	SRS3531728	SRS3614304	SRS3007164	SRS2660215	SRS3932748	SRS3531727	SRS2609391	SRS2922972	SRS3855333	SRS3643366	SRS3742753	SRS3614303	SRS2420927	SRS2761182	SRS2845130	SRS2547417	SRS3471904	SRS3453937	SRS3742747	SRS2938622	SRS3007170	SRS2938662	SRS3932840	SRS2525483	SRS2998915	SRS3218596	SRS3703452	SRS3871671	SRS3892739	SRS2938629	SRS3570561	SRS3703451
SRS2850296	0	89	594	580	570	566	566	564	581	574	582	577	576	576	574	573	576	573	576	574	574	574	573	573	572	572	570	570	588	585	581	580	579	577	577	576	577	577	574	578	578	577	576	578	576	578	578	575	575
SRS2628553	89	0	575	561	551	547	547	545	561	553	561	556	555	555	554	553	555	552	555	553	553	553	552	552	551	551	549	549	567	563	560	559	558	557	557	556	557	557	553	557	557	556	556	557	555	557	557	555	555
SRS2783476	594	575	0	21	222	219	218	217	235	225	234	230	229	228	228	227	228	226	229	227	227	227	226	226	225	225	223	223	241	238	234	233	231	230	230	229	230	230	226	231	231	230	231	231	229	231	231	231	229
SRS2998869	580	561	21	0	209	205	205	204	221	211	221	216	215	214	214	213	214	212	215	213	213	213	212	212	211	211	209	209	227	224	220	219	218	216	216	215	216	216	213	217	217	216	218	217	215	217	217	217	215
SRS2895509	570	551	222	209	0	10	10	9	209	201	209	204	203	202	202	201	202	200	203	201	201	201	200	200	199	199	197	197	215	212	208	207	206	203	203	202	203	203	201	205	205	204	205	205	203	205	205	204	203
SRS3384774	566	547	219	205	10	0	0	5	205	197	204	200	199	198	198	197	198	197	199	198	197	197	196	196	195	195	193	193	211	208	204	203	202	199	199	198	199	199	196	201	201	200	201	201	199	200	200	200	199
SRS3453943	566	547	218	205	10	0	0	5	205	197	205	200	199	198	198	197	198	196	199	197	197	197	196	196	195	195	193	193	211	208	204	203	202	199	199	198	199	199	197	201	201	200	201	201	199	201	201	200	199
SRS2998847	564	545	217	204	9	5	5	0	203	196	204	199	198	197	197	196	196	195	198	196	196	195	194	195	194	194	191	192	210	212	202	202	201	198	198	197	198	198	197	200	200	199	199	200	198	199	199	199	199
SRS3708648	581	561	235	221	209	205	205	203	0	64	72	67	66	65	65	64	64	64	66	65	64	64	63	63	62	62	60	60	78	74	71	70	70	68	68	68	67	68	63	68	68	67	67	68	67	68	68	68	66
SRS2547237	574	553	225	211	201	197	197	196	64	0	64	59	58	57	62	61	56	56	58	57	56	56	55	55	54	54	52	52	71	68	64	63	63	64	64	64	63	64	56	61	61	60	61	61	60	61	61	60	58
SRS3643394	582	561	234	221	209	204	205	204	72	64	0	33	32	31	36	35	34	30	32	31	30	30	29	29	28	28	26	26	79	76	72	71	70	72	72	72	71	72	64	69	69	68	69	69	68	69	69	68	66
SRS3871678	577	556	230	216	204	200	200	199	67	59	33	0	17	16	21	20	29	25	17	16	15	15	14	14	13	13	11	11	74	71	67	66	66	67	67	67	66	67	59	64	64	63	64	64	63	64	64	63	61
SRS3721753	576	555	229	215	203	199	199	198	66	58	32	17	0	11	20	19	28	24	12	11	10	10	9	13	12	12	10	10	73	70	66	65	65	66	66	66	65	66	58	63	63	62	63	63	62	63	63	62	60
SRS2761294	576	555	228	214	202	198	198	197	65	57	31	16	11	0	19	18	27	23	11	10	9	9	8	12	11	11	9	9	72	69	65	64	64	65	65	65	64	65	57	62	62	61	62	62	61	62	62	61	59
SRS3080280	574	554	228	214	202	198	198	197	65	62	36	21	20	19	0	1	32	28	20	19	18	18	17	15	16	16	14	14	76	73	69	68	68	67	67	67	66	67	57	66	66	65	63	66	65	66	66	61	59
SRS3080274	573	553	227	213	201	197	197	196	64	61	35	20	19	18	1	0	31	27	19	18	17	17	16	14	15	15	13	13	75	72	68	67	67	66	66	66	65	66	56	65	65	64	62	65	64	65	65	60	58
SRS3471848	576	555	228	214	202	198	198	196	64	56	34	29	28	27	32	31	0	26	28	27	26	26	25	25	24	24	22	22	71	68	64	63	63	64	64	65	64	64	58	61	61	60	60	61	60	61	61	60	58
SRS3531728	573	552	226	212	200	197	196	195	64	56	30	25	24	23	28	27	26	0	24	23	22	22	21	21	20	20	18	18	71	68	64	63	62	64	64	64	63	64	56	61	61	60	61	61	60	61	61	60	58
SRS3614304	576	555	229	215	203	199	199	198	66	58	32	17	12	11	20	19	28	24	0	3	2	6	5	13	12	12	10	10	73	70	66	65	65	66	66	66	65	66	58	63	63	62	63	63	62	63	63	62	60
SRS3007164	574	553	227	213	201	198	197	196	65	57	31	16	11	10	19	18	27	23	3	0	1	5	4	12	11	11	9	9	72	69	65	64	64	65	65	65	64	65	57	62	62	61	62	62	61	62	62	61	59
SRS2660215	574	553	227	213	201	197	197	196	64	56	30	15	10	9	18	17	26	22	2	1	0	4	3	11	10	10	8	8	71	68	64	63	63	64	64	64	63	64	56	61	61	60	61	61	60	61	61	60	58
SRS3932748	574	553	227	213	201	197	197	195	64	56	30	15	10	9	18	17	26	22	6	5	4	0	3	11	10	10	8	8	71	67	64	63	63	64	64	64	63	64	56	61	61	60	60	61	60	61	61	60	58
SRS3531727	573	552	226	212	200	196	196	194	63	55	29	14	9	8	17	16	25	21	5	4	3	3	0	10	9	9	7	7	70	66	63	62	62	63	63	63	62	63	55	60	60	59	59	60	59	60	60	59	57
SRS2609391	573	552	226	212	200	196	196	195	63	55	29	14	13	12	15	14	25	21	13	12	11	11	10	0	9	9	7	7	70	67	63	62	62	63	63	63	62	63	55	60	60	59	60	60	59	60	60	59	57
SRS2922972	572	551	225	211	199	195	195	194	62	54	28	13	12	11	16	15	24	20	12	11	10	10	9	9	0	8	4	4	69	66	62	61	61	62	62	62	62	62	55	59	59	58	59	59	58	59	59	58	56
SRS3855333	572	551	225	211	199	195	195	194	62	54	28	13	12	11	16	15	24	20	12	11	10	10	9	9	8	0	6	6	69	66	62	61	61	62	62	62	61	62	54	59	59	58	59	59	58	59	59	58	56
SRS3643366	570	549	223	209	197	193	193	191	60	52	26	11	10	9	14	13	22	18	10	9	8	8	7	7	4	6	0	2	67	63	60	59	59	60	60	60	59	60	52	57	57	56	56	57	56	57	57	56	54
SRS3742753	570	549	223	209	197	193	193	192	60	52	26	11	10	9	14	13	22	18	10	9	8	8	7	7	4	6	2	0	67	64	60	59	59	60	60	60	59	60	52	57	57	56	57	57	56	57	57	56	54
SRS3614303	588	567	241	227	215	211	211	210	78	71	79	74	73	72	76	75	71	71	73	72	71	71	70	70	69	69	67	67	0	39	37	36	36	48	48	48	47	48	39	34	32	31	35	32	31	32	32	32	32
SRS2420927	585	563	238	224	212	208	208	212	74	68	76	71	70	69	73	72	68	68	70	69	68	67	66	67	66	66	63	64	39	0	33	33	33	45	45	45	45	45	38	31	29	28	36	19	18	28	28	29	30
SRS2761182	581	560	234	220	208	204	204	202	71	64	72	67	66	65	69	68	64	64	66	65	64	64	63	63	62	62	60	60	37	33	0	29	29	41	41	41	40	41	32	27	27	26	27	27	26	27	27	27	25
SRS2845130	580	559	233	219	207	203	203	202	70	63	71	66	65	64	68	67	63	63	65	64	63	63	62	62	61	61	59	59	36	33	29	0	28	40	40	40	39	40	31	26	26	25	27	26	25	26	26	26	24
SRS2547417	579	558	231	218	206	202	202	201	70	63	70	66	65	64	68	67	63	62	65	64	63	63	62	62	61	61	59	59	36	33	29	28	0	40	40	40	39	40	30	26	26	25	27	26	25	26	26	26	24
SRS3471904	577	557	230	216	203	199	199	198	68	64	72	67	66	65	67	66	64	64	66	65	64	64	63	63	62	62	60	60	48	45	41	40	40	0	0	6	5	10	21	38	38	37	35	37	37	38	38	33	32
SRS3453937	577	557	230	216	203	199	199	198	68	64	72	67	66	65	67	66	64	64	66	65	64	64	63	63	62	62	60	60	48	45	41	40	40	0	0	6	5	10	21	38	38	37	35	37	37	38	38	33	32
SRS3742747	576	556	229	215	202	198	198	197	68	64	72	67	66	65	67	66	65	64	66	65	64	64	63	63	62	62	60	60	48	45	41	40	40	6	6	0	5	10	21	38	38	37	35	37	37	38	38	33	32
SRS2938622	577	557	230	216	203	199	199	198	67	63	71	66	65	64	66	65	64	63	65	64	63	63	62	62	62	61	59	59	47	45	40	39	39	5	5	5	0	9	20	37	37	36	34	36	36	37	37	32	31
SRS3007170	577	557	230	216	203	199	199	198	68	64	72	67	66	65	67	66	64	64	66	65	64	64	63	63	62	62	60	60	48	45	41	40	40	10	10	10	9	0	21	38	38	37	35	37	37	38	38	33	32
SRS2938662	574	553	226	213	201	196	197	197	63	56	64	59	58	57	57	56	58	56	58	57	56	56	55	55	55	54	52	52	39	38	32	31	30	21	21	21	20	21	0	29	29	28	31	29	28	29	29	29	27
SRS3932840	578	557	231	217	205	201	201	200	68	61	69	64	63	62	66	65	61	61	63	62	61	61	60	60	59	59	57	57	34	31	27	26	26	38	38	38	37	38	29	0	24	23	25	24	23	24	24	24	22
SRS2525483	578	557	231	217	205	201	201	200	68	61	69	64	63	62	66	65	61	61	63	62	61	61	60	60	59	59	57	57	32	29	27	26	26	38	38	38	37	38	29	24	0	21	25	22	21	22	22	22	22
SRS2998915	577	556	230	216	204	200	200	199	67	60	68	63	62	61	65	64	60	60	62	61	60	60	59	59	58	58	56	56	31	28	26	25	25	37	37	37	36	37	28	23	21	0	24	21	20	21	21	21	21
SRS3218596	576	556	231	218	205	201	201	199	67	61	69	64	63	62	63	62	60	61	63	62	61	60	59	60	59	59	56	57	35	36	27	27	27	35	35	35	34	35	31	25	25	24	0	25	24	24	24	24	24
SRS3703452	578	557	231	217	205	201	201	200	68	61	69	64	63	62	66	65	61	61	63	62	61	61	60	60	59	59	57	57	32	19	27	26	26	37	37	37	36	37	29	24	22	21	25	0	9	22	22	22	22
SRS3871671	576	555	229	215	203	199	199	198	67	60	68	63	62	61	65	64	60	60	62	61	60	60	59	59	58	58	56	56	31	18	26	25	25	37	37	37	36	37	28	23	21	20	24	9	0	21	21	21	21
SRS3892739	578	557	231	217	205	200	201	199	68	61	69	64	63	62	66	65	61	61	63	62	61	61	60	60	59	59	57	57	32	28	27	26	26	38	38	38	37	38	29	24	22	21	24	22	21	0	10	11	22
SRS2938629	578	557	231	217	205	200	201	199	68	61	69	64	63	62	66	65	61	61	63	62	61	61	60	60	59	59	57	57	32	28	27	26	26	38	38	38	37	38	29	24	22	21	24	22	21	10	0	5	22
SRS3570561	575	555	231	217	204	200	200	199	68	60	68	63	62	61	61	60	60	60	62	61	60	60	59	59	58	58	56	56	32	29	27	26	26	33	33	33	32	33	29	24	22	21	24	22	21	11	5	0	21
SRS3703451	575	555	229	215	203	199	199	199	66	58	66	61	60	59	59	58	58	58	60	59	58	58	57	57	56	56	54	54	32	30	25	24	24	32	32	32	31	32	27	22	22	21	24	22	21	22	22	21	0
SRS3703470	574	553	227	213	201	197	197	199	64	57	65	60	59	58	62	61	57	57	59	58	57	57	56	56	55	55	53	53	30	33	23	22	22	34	34	34	33	34	25	20	20	19	24	20	19	20	20	20	18
SRS3876540	574	553	227	213	201	197	197	196	64	57	65	60	59	58	62	61	57	57	59	58	57	57	56	56	55	55	53	53	30	27	23	22	22	34	34	34	33	34	25	20	20	19	21	20	19	20	20	20	18
SRS2998873	575	555	229	215	202	198	198	198	66	58	66	61	60	59	59	58	58	58	60	59	58	58	57	57	56	56	54	54	32	30	11	24	24	31	31	31	30	31	27	22	22	21	23	22	21	22	22	22	19
SRS3877810	571	551	225	211	199	196	195	193	64	57	65	60	59	58	62	61	57	57	59	58	57	57	56	56	55	55	53	53	28	14	23	22	22	34	34	34	33	34	25	20	18	17	20	8	7	18	18	18	17
SRS2628565	572	551	225	211	199	195	195	194	62	55	63	58	57	56	60	59	55	55	57	56	55	55	54	54	53	53	51	51	28	25	21	20	20	32	32	32	31	32	23	18	18	17	19	18	17	18	18	18	16
min	0
max	594
avg	114.344
[truncated: 5 more columns]

## Sheet: C
	SRS2628542	SRS2709963	SRS2547178	SRS2655760	SRS2442409	SRS2822480	SRS3944395	SRS3975519	SRS2442415	SRS2998834	SRS2761300	SRS2998855	SRS2609377	SRS2420915	SRS3623378	SRS3950101	SRS3871596	SRS2695323	SRS3721795	SRS3877801	SRS2850289	SRS3010019	SRS2420931	SRS2926162	SRS3643408	SRS3876542	SRS2998913	SRS3871610	SRS3021992	SRS3975507	SRS3643364	SRS3877812	SRS2961449	SRS3721793	SRS2609380	SRS3080188	SRS3643397	SRS3597673	SRS3932734	SRS3021995	SRS3277971	SRS3703468	SRS2609378	SRS3737739	SRS2938638	SRS2532115	SRS2660207	SRS3676310	SRS3753120
SRS2628542	0	1163	1404	1335	1335	1302	1301	1300	1261	1150	1278	1296	1284	1280	1276	1280	1279	1279	1279	1275	1273	1273	1272	1272	1272	1279	1278	1280	1279	1279	1277	1276	1271	1272	1273	1275	1270	1269	1267	1266	1277	1275	1274	1272	1276	1274	1271	1272	1272
SRS2709963	1163	0	1386	1316	1327	1291	1289	1288	1241	1139	1262	1281	1270	1263	1260	1265	1265	1263	1263	1260	1258	1258	1257	1257	1257	1264	1263	1266	1266	1264	1265	1263	1261	1262	1260	1261	1255	1253	1251	1251	1261	1260	1259	1258	1262	1257	1256	1256	1256
SRS2547178	1404	1386	0	676	1126	1091	1089	1089	1041	928	1058	1077	1066	1060	1055	1061	1061	1058	1059	1055	1055	1054	1053	1053	1053	1060	1059	1061	1061	1060	1058	1058	1055	1056	1055	1057	1050	1049	1047	1047	1057	1053	1055	1055	1057	1053	1052	1053	1052
SRS2655760	1335	1316	676	0	1051	1016	1014	1014	970	855	987	1005	994	989	985	989	988	988	988	983	982	982	980	981	981	987	985	989	988	987	987	985	982	982	983	984	979	978	975	975	985	981	984	984	985	982	979	982	982
SRS2442409	1335	1327	1126	1051	0	353	351	350	976	862	990	1008	997	992	989	992	992	991	991	987	986	985	985	984	984	990	989	994	993	993	987	989	983	986	987	988	984	981	979	978	988	989	988	985	989	985	983	985	985
SRS2822480	1302	1291	1091	1016	353	0	42	40	945	829	955	976	965	960	957	960	959	959	959	954	953	953	952	952	952	958	956	961	960	960	954	956	953	954	954	955	950	949	947	946	956	956	955	954	956	953	950	953	953
SRS3944395	1301	1289	1089	1014	351	42	0	2	944	828	954	975	964	959	956	959	958	958	958	953	952	952	951	951	951	957	955	960	959	959	953	955	952	953	953	954	949	948	946	945	955	955	954	953	955	952	949	952	952
SRS3975519	1300	1288	1089	1014	350	40	2	0	943	827	953	974	963	958	955	958	957	957	957	952	951	951	950	950	950	956	954	958	957	957	951	953	950	951	951	953	948	947	945	944	953	953	952	951	953	950	947	950	950
SRS2442415	1261	1241	1041	970	976	945	944	943	0	786	913	933	922	916	912	917	916	915	915	912	910	910	908	909	909	916	914	917	917	915	916	914	912	911	911	912	906	905	903	903	913	912	911	912	915	909	907	909	909
SRS2998834	1150	1139	928	855	862	829	828	827	786	0	347	364	354	349	348	348	348	348	348	344	342	342	341	341	341	349	346	349	348	348	348	345	345	344	342	344	341	338	336	335	345	346	344	344	346	342	339	342	342
SRS2761300	1278	1262	1058	987	990	955	954	953	913	347	0	137	126	121	120	121	120	120	120	116	114	114	113	113	113	120	117	122	121	121	120	117	120	119	115	116	112	110	108	107	117	118	116	116	118	114	111	114	114
SRS2998855	1296	1281	1077	1005	1008	976	975	974	933	364	137	0	43	40	40	22	38	39	37	33	34	33	33	32	32	79	76	84	83	83	83	80	82	81	77	78	74	71	69	68	78	80	78	77	79	75	73	75	75
SRS2609377	1284	1270	1066	994	997	965	964	963	922	354	126	43	0	29	29	27	27	28	20	22	23	22	22	21	21	68	65	73	72	72	72	69	71	70	66	67	64	60	58	57	67	69	67	66	68	64	62	64	64
SRS2420915	1280	1263	1060	989	992	960	959	958	916	349	121	40	29	0	10	24	24	23	23	19	18	17	17	16	16	63	60	68	67	67	67	64	66	65	61	62	59	55	53	52	62	64	62	61	63	59	57	59	59
SRS3623378	1276	1260	1055	985	989	957	956	955	912	348	120	40	29	10	0	24	24	23	23	19	18	17	17	16	16	62	59	68	67	67	66	63	66	65	61	62	59	55	53	52	62	64	62	61	63	58	57	59	59
SRS3950101	1280	1265	1061	989	992	960	959	958	917	348	121	22	27	24	24	0	22	23	21	17	18	17	17	16	16	63	60	68	67	67	67	64	66	65	61	62	58	55	53	52	62	64	62	61	63	59	57	59	59
SRS3871596	1279	1265	1061	988	992	959	958	957	916	348	120	38	27	24	24	22	0	23	21	17	18	17	17	16	16	62	59	68	67	67	66	63	66	65	61	62	59	55	53	52	62	64	62	61	63	59	57	59	59
SRS2695323	1279	1263	1058	988	991	959	958	957	915	348	120	39	28	23	23	23	23	0	22	18	17	16	16	15	15	62	59	67	66	66	66	63	65	64	60	61	58	54	52	51	61	63	61	60	62	58	56	58	58
SRS3721795	1279	1263	1059	988	991	959	958	957	915	348	120	37	20	23	23	21	21	22	0	16	17	16	16	15	15	62	59	67	66	66	66	63	65	64	60	61	58	54	52	51	61	63	61	60	62	58	56	58	58
SRS3877801	1275	1260	1055	983	987	954	953	952	912	344	116	33	22	19	19	17	17	18	16	0	13	12	12	11	11	58	55	63	62	62	62	59	61	60	56	57	54	50	48	47	57	59	57	56	58	54	52	54	54
SRS2850289	1273	1258	1055	982	986	953	952	951	910	342	114	34	23	18	18	18	18	17	17	13	0	11	11	10	10	55	53	62	61	61	59	57	60	58	55	56	53	49	47	46	56	58	56	55	57	53	51	53	53
SRS3010019	1273	1258	1054	982	985	953	952	951	910	342	114	33	22	17	17	17	17	16	16	12	11	0	10	9	9	56	53	61	60	60	60	57	59	58	54	55	52	48	46	45	55	57	55	54	56	52	50	52	52
SRS2420931	1272	1257	1053	980	985	952	951	950	908	341	113	33	22	17	17	17	17	16	16	12	11	10	0	9	9	55	52	61	60	60	59	56	59	58	54	55	52	48	46	45	55	57	55	54	56	52	50	52	52
SRS2926162	1272	1257	1053	981	984	952	951	950	909	341	113	32	21	16	16	16	16	15	15	11	10	9	9	0	6	55	52	60	59	59	59	56	58	57	53	54	51	47	45	44	54	56	54	53	55	51	49	51	51
SRS3643408	1272	1257	1053	981	984	952	951	950	909	341	113	32	21	16	16	16	16	15	15	11	10	9	9	6	0	55	52	60	59	59	59	56	58	57	53	54	51	47	45	44	54	56	54	53	55	51	49	51	51
SRS3876542	1279	1264	1060	987	990	958	957	956	916	349	120	79	68	63	62	63	62	62	62	58	55	56	55	55	55	0	3	68	67	67	66	63	66	65	61	62	59	56	54	53	62	63	61	61	63	58	56	59	59
SRS2998913	1278	1263	1059	985	989	956	955	954	914	346	117	76	65	60	59	60	59	59	59	55	53	53	52	52	52	3	0	65	64	64	63	60	63	62	58	59	56	53	51	50	60	61	59	59	61	57	54	57	57
SRS3871610	1280	1266	1061	989	994	961	960	958	917	349	122	84	73	68	68	68	68	67	67	63	62	61	61	60	60	68	65	0	17	17	16	13	16	15	11	52	49	45	43	42	64	66	64	63	65	61	59	61	61
SRS3021992	1279	1266	1061	988	993	960	959	957	917	348	121	83	72	67	67	67	67	66	66	62	61	60	60	59	59	67	64	17	0	16	15	12	15	14	10	51	48	44	42	41	63	65	63	62	64	60	58	60	60
SRS3975507	1279	1264	1060	987	993	960	959	957	915	348	121	83	72	67	67	67	67	66	66	62	61	60	60	59	59	67	64	17	16	0	13	10	13	12	8	51	48	44	42	41	63	65	63	62	64	60	58	60	60
SRS3643364	1277	1265	1058	987	987	954	953	951	916	348	120	83	72	67	66	67	66	66	66	62	59	60	59	59	59	66	63	16	15	13	0	9	12	11	7	50	47	44	42	41	63	64	62	62	64	60	57	60	60
SRS3877812	1276	1263	1058	985	989	956	955	953	914	345	117	80	69	64	63	64	63	63	63	59	57	57	56	56	56	63	60	13	12	10	9	0	9	8	4	47	44	41	39	38	60	61	59	59	61	57	54	57	57
SRS2961449	1271	1261	1055	982	983	953	952	950	912	345	120	82	71	66	66	66	66	65	65	61	60	59	59	58	58	66	63	16	15	13	12	9	0	8	7	50	47	43	40	40	62	63	61	60	63	59	57	59	58
SRS3721793	1272	1262	1056	982	986	954	953	951	911	344	119	81	70	65	65	65	65	64	64	60	58	58	58	57	57	65	62	15	14	12	11	8	8	0	6	49	46	42	40	39	61	62	60	59	62	58	56	58	57
SRS2609380	1273	1260	1055	983	987	954	953	951	911	342	115	77	66	61	61	61	61	60	60	56	55	54	54	53	53	61	58	11	10	8	7	4	7	6	0	45	42	38	36	35	57	59	57	56	58	54	52	54	54
SRS3080188	1275	1261	1057	984	988	955	954	953	912	344	116	78	67	62	62	62	62	61	61	57	56	55	55	54	54	62	59	52	51	51	50	47	50	49	45	0	15	17	15	14	58	60	58	57	59	55	53	55	55
SRS3643397	1270	1255	1050	979	984	950	949	948	906	341	112	74	64	59	59	58	59	58	58	54	53	52	52	51	51	59	56	49	48	48	47	44	47	46	42	15	0	14	12	11	55	57	55	54	56	52	50	52	52
SRS3597673	1269	1253	1049	978	981	949	948	947	905	338	110	71	60	55	55	55	55	54	54	50	49	48	48	47	47	56	53	45	44	44	44	41	43	42	38	17	14	0	6	5	51	53	51	50	52	48	46	48	48
SRS3932734	1267	1251	1047	975	979	947	946	945	903	336	108	69	58	53	53	53	53	52	52	48	47	46	46	45	45	54	51	43	42	42	42	39	40	40	36	15	12	6	0	1	49	51	49	48	50	46	44	46	46
SRS3021995	1266	1251	1047	975	978	946	945	944	903	335	107	68	57	52	52	52	52	51	51	47	46	45	45	44	44	53	50	42	41	41	41	38	40	39	35	14	11	5	1	0	48	50	48	47	49	45	43	45	45
SRS3277971	1277	1261	1057	985	988	956	955	953	913	345	117	78	67	62	62	62	62	61	61	57	56	55	55	54	54	62	60	64	63	63	63	60	62	61	57	58	55	51	49	48	0	34	32	31	33	25	27	29	29
SRS3703468	1275	1260	1053	981	989	956	955	953	912	346	118	80	69	64	64	64	64	63	63	59	58	57	57	56	56	63	61	66	65	65	64	61	63	62	59	60	57	53	51	50	34	0	18	17	29	31	29	25	15
SRS2609378	1274	1259	1055	984	988	955	954	952	911	344	116	78	67	62	62	62	62	61	61	57	56	55	55	54	54	61	59	64	63	63	62	59	61	60	57	58	55	51	49	48	32	18	0	9	27	29	27	23	9
SRS3737739	1272	1258	1055	984	985	954	953	951	912	344	116	77	66	61	61	61	61	60	60	56	55	54	54	53	53	61	59	63	62	62	62	59	60	59	56	57	54	50	48	47	31	17	9	0	26	28	26	22	8
SRS2938638	1276	1262	1057	985	989	956	955	953	915	346	118	79	68	63	63	63	63	62	62	58	57	56	56	55	55	63	61	65	64	64	64	61	63	62	58	59	56	52	50	49	33	29	27	26	0	30	28	24	24
SRS2532115	1274	1257	1053	982	985	953	952	950	909	342	114	75	64	59	58	59	59	58	58	54	53	52	52	51	51	58	57	61	60	60	60	57	59	58	54	55	52	48	46	45	25	31	29	28	30	0	24	26	26
SRS2660207	1271	1256	1052	979	983	950	949	947	907	339	111	73	62	57	57	57	57	56	56	52	51	50	50	49	49	56	54	59	58	58	57	54	57	56	52	53	50	46	44	43	27	29	27	26	28	24	0	24	24
SRS3676310	1272	1256	1053	982	985	953	952	950	909	342	114	75	64	59	59	59	59	58	58	54	53	52	52	51	51	59	57	61	60	60	60	57	59	58	54	55	52	48	46	45	29	25	23	22	24	26	24	0	20
SRS3753120	1272	1256	1052	982	985	953	952	950	909	342	114	75	64	59	59	59	59	58	58	54	53	52	52	51	51	59	57	61	60	60	60	57	58	57	54	55	52	48	46	45	29	15	9	8	24	26	24	20	0
SRS2609382	1271	1255	1052	981	984	952	951	949	908	341	113	74	63	58	58	58	58	57	57	53	52	51	51	50	50	58	56	60	59	59	59	56	57	56	53	54	51	47	45	44	28	14	12	11	23	25	23	19	9
SRS3944382	1274	1257	1053	982	985	953	952	950	909	342	114	75	64	59	59	59	59	58	58	54	53	52	52	51	51	59	57	61	60	60	60	57	59	58	54	55	52	48	46	45	29	31	29	28	30	26	22	26	26
SRS2938625	1273	1257	1052	981	984	952	951	949	909	341	113	74	63	58	58	58	58	57	57	53	52	51	51	50	50	58	56	60	59	59	59	56	58	57	53	54	51	47	45	44	28	30	28	27	29	25	21	25	25
SRS3623430	1272	1256	1052	980	983	951	950	948	908	341	113	74	63	58	58	58	58	57	57	53	52	51	51	50	50	58	56	60	59	59	59	56	58	57	53	54	51	47	45	44	28	30	28	27	29	25	21	25	25
SRS3242649	1270	1254	1049	979	981	949	948	946	906	341	113	74	63	58	58	58	58	57	57	53	52	51	51	50	50	58	56	60	59	59	59	56	58	57	53	54	51	47	45	44	28	30	28	27	29	25	21	25	25
SRS3799118	1271	1254	1050	979	982	950	949	947	906	339	111	72	61	56	56	56	56	55	55	51	50	49	49	48	48	56	54	58	57	57	57	54	56	55	51	52	49	45	43	42	26	28	26	25	27	23	19	23	23
SRS2845135	1271	1255	1050	979	982	951	950	948	907	339	111	72	61	56	56	56	56	55	55	51	50	49	49	48	48	56	54	58	57	57	57	54	56	55	51	52	49	45	43	42	26	28	26	25	27	23	19	23	23
SRS3721796	1268	1252	1049	977	980	948	947	945	905	337	109	70	59	54	54	54	54	53	53	49	48	47	47	46	46	54	52	56	55	55	55	52	54	53	49	50	47	43	41	40	24	26	24	23	25	21	17	21	21
SRS2850296	1257	1245	1055	985	986	951	949	947	913	799	926	945	934	928	926	929	929	926	926	923	923	922	921	921	921	927	926	930	930	928	928	926	922	923	924	925	919	917	915	915	925	923	922	922	923	921	920	919	919
SRS2628553	1242	1231	1040	970	971	933	931	929	894	781	911	929	918	913	911	913	913	911	911	907	907	906	906	905	905	912	910	914	913	912	911	909	906	906	907	909	904	902	900	899	909	908	907	906	907	906	904	904	904
SRS2783476	1352	1342	1149	1079	1081	1048	1047	1045	1011	897	1025	1044	1033	1027	1024	1028	1028	1026	1026	1023	1022	1021	1020	1020	1019	1027	1025	1028	1028	1027	1025	1024	1020	1019	1022	1024	1019	1016	1014	1014	1024	1022	1021	1021	1023	1019	1019	1018	1018
SRS2998869	1337	1326	1137	1069	1068	1035	1034	1032	996	882	1010	1029	1018	1013	1011	1013	1013	1012	1012	1008	1007	1006	1006	1005	1004	1013	1010	1014	1013	1013	1010	1009	1006	1004	1007	1009	1005	1002	1000	999	1009	1008	1007	1006	1008	1005	1004	1004	1004
SRS2895509	1333	1316	1134	1064	1059	1024	1023	1021	985	875	1002	1023	1012	1006	1003	1007	1007	1005	1005	1002	1001	1000	999	999	998	1006	1004	1007	1007	1006	1004	1003	997	998	1001	1003	997	995	993	993	1003	1001	1000	1000	1002	999	998	997	997
SRS3453943	1329	1312	1129	1060	1055	1021	1020	1018	980	871	999	1019	1008	1002	999	1003	1003	1001	1001	998	997	996	995	995	994	1002	1000	1003	1003	1002	1000	999	993	994	997	999	993	991	989	989	999	997	996	996	998	995	994	993	993
SRS3384774	1328	1310	1126	1059	1053	1020	1019	1017	979	870	997	1017	1006	1000	997	1001	1001	999	999	996	995	994	993	993	992	1000	998	1001	1001	1000	998	997	991	992	995	997	991	989	987	987	997	995	994	994	996	993	992	991	991
SRS2998847	1326	1309	1126	1056	1052	1018	1017	1015	977	867	995	1015	1004	998	995	999	999	997	997	994	993	992	991	991	990	998	996	999	999	998	996	995	989	990	993	995	990	987	985	985	995	993	992	992	994	991	990	989	989
SRS3708648	1346	1333	1148	1077	1073	1038	1037	1035	1002	889	1017	1037	1026	1021	1018	1021	1021	1020	1020	1016	1015	1014	1014	1013	1012	1021	1018	1022	1021	1021	1017	1017	1012	1010	1015	1017	1011	1010	1008	1007	1017	1016	1015	1014	1015	1013	1012	1012	1012
SRS2547237	1340	1329	1142	1069	1066	1039	1038	1036	1003	883	1010	1031	1020	1015	1011	1015	1014	1014	1014	1010	1008	1008	1007	1007	1006	1014	1011	1015	1014	1014	1010	1010	1006	1004	1008	1010	1004	1004	1002	1001	1011	1009	1008	1008	1009	1007	1005	1006	1006
SRS3643394	1348	1335	1148	1077	1075	1040	1039	1037	1002	890	1018	1038	1027	1021	1018	1022	1022	1020	1020	1017	1016	1015	1014	1014	1013	1021	1019	1022	1022	1021	1018	1018	1012	1012	1016	1018	1012	1010	1008	1008	1018	1016	1015	1015	1016	1013	1013	1012	1012
SRS3871678	1342	1331	1145	1073	1068	1034	1033	1031	999	885	1013	1033	1022	1017	1014	1017	1017	1016	1016	1012	1011	1010	1010	1009	1008	1017	1014	1018	1017	1017	1013	1013	1008	1007	1011	1013	1007	1006	1004	1003	1013	1012	1011	1010	1011	1009	1008	1008	1008
SRS3721753	1340	1328	1142	1071	1067	1032	1031	1029	996	883	1011	1031	1020	1015	1012	1015	1015	1014	1014	1010	1009	1008	1008	1007	1006	1015	1012	1016	1015	1015	1011	1011	1006	1005	1009	1011	1005	1004	1002	1001	1011	1010	1009	1008	1009	1007	1006	1006	1006
SRS2761294	1341	1329	1144	1071	1066	1038	1037	1035	1003	883	1010	1031	1020	1015	1011	1015	1014	1014	1014	1010	1008	1008	1007	1007	1006	1014	1011	1015	1014	1014	1010	1010	1005	1004	1008	1010	1004	1004	1002	1001	1011	1009	1008	1008	1009	1007	1005	1006	1006
SRS3614304	1340	1330	1144	1072	1068	1034	1033	1031	998	881	1010	1030	1019	1014	1011	1014	1013	1013	1013	1009	1007	1007	1006	1006	1005	1014	1011	1014	1013	1013	1010	1010	1003	1003	1007	1009	1003	1003	1001	1000	1010	1008	1007	1007	1008	1006	1004	1005	1005
SRS3080280	1340	1329	1143	1071	1067	1032	1031	1029	997	883	1011	1031	1020	1015	1012	1015	1015	1014	1014	1010	1009	1008	1008	1007	1006	1015	1012	1016	1015	1015	1011	1011	1006	1005	1009	1011	1005	1004	1002	1001	1011	1010	1009	1008	1009	1007	1006	1006	1006
SRS3080274	1339	1328	1142	1070	1066	1031	1030	1028	996	882	1010	1030	1019	1014	1011	1014	1014	1013	1013	1009	1008	1007	1007	1006	1005	1014	1011	1015	1014	1014	1010	1010	1005	1004	1008	1010	1004	1003	1001	1000	1010	1009	1008	1007	1008	1006	1005	1005	1005
SRS3531728	1338	1326	1139	1067	1065	1032	1031	1029	992	881	1009	1029	1018	1012	1008	1013	1012	1011	1011	1008	1006	1006	1004	1005	1004	1012	1010	1012	1012	1011	1009	1009	1003	1002	1006	1008	1003	1001	999	999	1009	1006	1005	1006	1007	1004	1003	1003	1003
SRS3471848	1336	1326	1140	1068	1063	1029	1028	1026	993	879	1008	1028	1017	1012	1008	1012	1011	1011	1011	1007	1005	1005	1004	1004	1003	1012	1009	1012	1011	1011	1008	1008	1002	1001	1005	1007	1001	1001	999	998	1008	1006	1005	1005	1006	1004	1002	1003	1003
SRS2609391	1338	1328	1142	1069	1065	1031	1030	1028	995	881	1010	1030	1019	1014	1010	1014	1013	1013	1013	1009	1007	1007	1006	1006	1005	1014	1011	1014	1013	1013	1010	1010	1004	1003	1007	1009	1003	1003	1001	1000	1010	1008	1007	1007	1008	1006	1004	1005	1005
SRS3855333	1337	1326	1140	1068	1064	1029	1028	1026	994	880	1008	1028	1017	1012	1009	1012	1012	1011	1011	1007	1006	1005	1005	1004	1003	1012	1009	1013	1012	1012	1008	1008	1003	1002	1006	1008	1002	1001	999	998	1008	1007	1006	1005	1006	1004	1003	1003	1003
SRS2922972	1337	1326	1140	1068	1064	1029	1028	1026	994	880	1008	1028	1017	1012	1009	1012	1012	1011	1011	1007	1006	1005	1005	1004	1003	1012	1009	1013	1012	1012	1008	1008	1003	1002	1006	1008	1002	1001	999	998	1008	1007	1006	1005	1006	1004	1003	1003	1003
SRS3932748	1339	1328	1142	1070	1066	1031	1030	1028	996	880	1008	1028	1017	1012	1009	1012	1012	1011	1011	1007	1006	1005	1005	1004	1003	1012	1009	1013	1012	1012	1008	1008	1003	1002	1006	1008	1002	1001	999	998	1008	1007	1006	1005	1006	1004	1003	1003	1003
SRS2660215	1339	1327	1142	1070	1066	1031	1030	1028	995	879	1008	1028	1017	1012	1009	1012	1012	1011	1011	1007	1006	1005	1005	1004	1003	1012	1009	1013	1012	1012	1008	1008	1002	1002	1006	1008	1002	1001	999	998	1008	1007	1006	1005	1006	1004	1003	1003	1003
SRS3007164	1338	1327	1141	1069	1065	1030	1029	1027	995	880	1007	1027	1016	1011	1008	1011	1011	1010	1010	1006	1005	1004	1004	1003	1002	1011	1008	1012	1011	1011	1007	1007	1002	1001	1005	1007	1002	1000	998	997	1007	1006	1005	1004	1005	1003	1002	1002	1002
SRS3531727	1338	1326	1140	1069	1064	1030	1029	1027	994	879	1007	1027	1016	1011	1008	1011	1011	1010	1010	1006	1005	1004	1004	1003	1002	1011	1008	1012	1011	1011	1007	1007	1002	1001	1005	1007	1001	1000	998	997	1007	1006	1005	1004	1005	1003	1002	1002	1002
SRS3643366	1334	1323	1137	1065	1061	1026	1025	1023	991	877	1005	1025	1014	1009	1006	1009	1009	1008	1008	1004	1003	1002	1002	1001	1000	1009	1006	1010	1009	1009	1005	1005	1000	999	1003	1005	999	998	996	995	1005	1004	1003	1002	1003	1001	1000	1000	1000
SRS3742753	1332	1320	1136	1065	1060	1026	1025	1023	991	876	1004	1024	1013	1008	1006	1008	1008	1007	1007	1003	1002	1001	1001	1000	999	1008	1005	1008	1007	1007	1003	1003	998	997	1001	1004	998	997	995	994	1004	1003	1002	1001	1002	1000	999	999	999
SRS3614303	1350	1339	1153	1081	1077	1042	1041	1039	1007	893	1021	1041	1030	1025	1022	1025	1025	1024	1024	1020	1019	1018	1018	1017	1016	1025	1022	1026	1025	1025	1021	1021	1017	1015	1019	1021	1015	1014	1012	1011	1021	1020	1019	1018	1019	1017	1016	1016	1016
SRS2420927	1350	1338	1151	1079	1076	1042	1041	1039	1007	892	1020	1040	1029	1024	1021	1024	1024	1023	1023	1019	1018	1017	1017	1016	1015	1024	1021	1025	1024	1024	1019	1020	1016	1014	1018	1020	1014	1012	1011	1010	1020	1018	1018	1017	1018	1016	1015	1015	1015
SRS2761182	1346	1335	1149	1077	1073	1038	1037	1035	1003	889	1017	1037	1026	1021	1018	1021	1021	1020	1020	1016	1015	1014	1014	1013	1012	1021	1018	1022	1021	1021	1017	1017	1013	1011	1015	1017	1011	1010	1008	1007	1017	1016	1015	1014	1015	1013	1012	1012	1012
SRS2845130	1344	1333	1147	1075	1071	1036	1035	1033	1001	887	1015	1035	1024	1019	1016	1019	1019	1018	1018	1014	1013	1012	1012	1011	1010	1019	1016	1020	1019	1019	1015	1015	1011	1009	1013	1015	1009	1008	1006	1005	1015	1014	1013	1012	1013	1011	1010	1010	1010
SRS2525483	1342	1332	1146	1073	1069	1035	1034	1032	999	885	1014	1034	1023	1018	1014	1018	1017	1017	1017	1013	1011	1011	1010	1010	1009	1018	1015	1018	1017	1017	1014	1014	1009	1007	1011	1013	1007	1007	1005	1004	1014	1012	1011	1011	1012	1010	1008	1009	1009
SRS3892739	1343	1333	1147	1074	1070	1036	1035	1033	1000	886	1015	1035	1024	1019	1015	1019	1018	1018	1018	1014	1012	1012	1011	1011	1010	1019	1016	1019	1018	1018	1015	1015	1010	1008	1012	1014	1008	1008	1006	1005	1015	1013	1012	1012	1013	1011	1009	1010	1010
SRS2938629	1342	1332	1146	1073	1069	1035	1034	1032	999	885	1014	1034	1023	1018	1014	1018	1017	1017	1017	1013	1011	1011	1010	1010	1009	1018	1015	1018	1017	1017	1014	1014	1009	1007	1011	1013	1007	1007	1005	1004	1013	1011	1010	1010	1011	1009	1007	1008	1008
SRS3570561	1338	1327	1141	1070	1065	1030	1029	1027	996	883	1011	1031	1020	1015	1012	1015	1015	1014	1014	1010	1009	1008	1008	1006	1006	1014	1011	1016	1015	1015	1011	1011	1007	1005	1009	1011	1005	1004	1002	1001	1011	1010	1009	1008	1009	1007	1006	1006	1006
SRS3932840	1342	1331	1145	1073	1069	1034	1033	1031	999	885	1013	1033	1022	1017	1014	1017	1017	1016	1016	1012	1011	1010	1010	1009	1008	1017	1014	1018	1017	1017	1013	1013	1009	1007	1011	1013	1007	1006	1004	1003	1013	1012	1011	1010	1011	1009	1008	1008	1008
SRS2998915	1340	1331	1145	1072	1068	1034	1033	1031	998	883	1012	1032	1021	1016	1012	1016	1015	1015	1015	1011	1009	1009	1008	1008	1007	1016	1013	1016	1015	1015	1013	1012	1007	1006	1009	1011	1005	1005	1003	1002	1012	1010	1009	1009	1010	1008	1006	1007	1007
SRS2547417	1340	1329	1144	1071	1067	1033	1032	1030	997	883	1012	1032	1021	1016	1012	1016	1015	1015	1015	1011	1009	1009	1008	1008	1007	1016	1013	1016	1015	1015	1012	1012	1007	1005	1009	1011	1005	1005	1003	1002	1012	1010	1009	1009	1010	1008	1006	1007	1007
SRS3703451	1340	1329	1143	1071	1067	1032	1031	1029	997	883	1011	1031	1020	1015	1012	1015	1015	1014	1014	1010	1009	1008	1008	1007	1006	1015	1012	1016	1015	1015	1011	1011	1007	1005	1009	1011	1005	1004	1002	1001	1011	1010	1009	1008	1009	1007	1006	1006	1006
SRS3703452	1341	1331	1146	1073	1068	1035	1034	1032	999	883	1012	1032	1021	1016	1013	1016	1015	1015	1015	1011	1009	1009	1008	1008	1007	1016	1013	1016	1015	1015	1013	1012	1007	1006	1009	1011	1005	1005	1003	1002	1012	1010	1009	1009	1010	1008	1006	1007	1007
SRS3871671	1340	1329	1143	1071	1067	1032	1031	1029	997	883	1011	1031	1020	1015	1012	1015	1015	1014	1014	1010	1009	1008	1008	1007	1006	1015	1012	1016	1015	1015	1012	1011	1007	1006	1009	1011	1005	1004	1002	1001	1011	1010	1009	1008	1010	1007	1006	1006	1006
SRS2998873	1339	1328	1142	1070	1064	1031	1030	1028	996	882	1010	1030	1019	1014	1011	1014	1014	1013	1013	1009	1008	1007	1007	1006	1005	1014	1011	1014	1013	1013	1009	1009	1005	1003	1007	1010	1004	1003	1001	1000	1010	1009	1008	1007	1008	1005	1005	1005	1005
SRS3218596	1338	1327	1142	1071	1067	1032	1031	1029	996	882	1010	1030	1019	1014	1012	1014	1014	1013	1013	1009	1008	1007	1007	1006	1005	1014	1011	1015	1014	1014	1010	1010	1006	1004	1008	1010	1004	1003	1001	1000	1010	1009	1008	1007	1008	1006	1005	1005	1005
SRS3703470	1338	1327	1142	1070	1066	1030	1029	1027	996	882	1010	1030	1019	1014	1011	1014	1014	1013	1013	1009	1008	1007	1007	1006	1005	1014	1011	1015	1014	1014	1010	1010	1006	1004	1008	1010	1004	1003	1001	1000	1010	1009	1008	1007	1008	1006	1005	1005	1005
SRS3876540	1338	1326	1141	1069	1065	1030	1029	1027	995	881	1009	1029	1018	1013	1010	1013	1013	1012	1012	1008	1007	1006	1006	1005	1004	1013	1010	1014	1013	1013	1009	1009	1005	1003	1007	1009	1003	1002	1000	999	1009	1008	1007	1006	1007	1005	1004	1004	1004
SRS3877810	1336	1326	1140	1068	1064	1029	1028	1026	994	881	1008	1028	1017	1012	1009	1012	1012	1011	1011	1007	1006	1005	1005	1004	1003	1012	1009	1013	1012	1012	1009	1008	1005	1003	1006	1008	1003	1001	999	998	1007	1006	1005	1004	1006	1002	1002	1002	1002
SRS2628565	1336	1325	1139	1068	1063	1028	1027	1025	993	879	1007	1027	1016	1011	1008	1011	1011	1010	1010	1006	1005	1004	1004	1003	1002	1011	1008	1012	1011	1011	1007	1007	1003	1001	1005	1007	1001	1000	998	997	1007	1006	1005	1004	1005	1003	1002	1002	1002
SRS3453937	1342	1330	1145	1073	1069	1034	1033	1031	999	885	1013	1033	1022	1017	1014	1017	1017	1016	1016	1012	1011	1010	1010	1009	1008	1017	1014	1018	1017	1017	1012	1013	1009	1007	1011	1013	1007	1006	1004	1003	1013	1012	1011	1010	1011	1009	1008	1008	1008
SRS3471904	1341	1329	1144	1072	1068	1033	1032	1030	998	884	1012	1032	1021	1016	1013	1016	1016	1015	1015	1011	1010	1009	1009	1008	1007	1016	1013	1017	1016	1016	1011	1012	1008	1006	1010	1012	1006	1005	1003	1002	1012	1011	1010	1009	1010	1008	1007	1007	1007
SRS3742747	1340	1330	1145	1072	1068	1034	1033	1031	998	884	1013	1033	1022	1017	1013	1017	1016	1016	1016	1012	1010	1010	1009	1009	1008	1017	1014	1017	1016	1016	1013	1013	1008	1007	1010	1012	1006	1006	1004	1003	1013	1011	1010	1010	1012	1009	1007	1008	1008
SRS2938622	1341	1330	1145	1072	1068	1034	1033	1031	998	884	1013	1033	1022	1017	1013	1017	1016	1016	1016	1012	1010	1010	1009	1009	1008	1017	1014	1017	1016	1016	1012	1013	1008	1006	1010	1012	1006	1006	1004	1003	1013	1011	1010	1010	1011	1009	1007	1008	1008
SRS3007170	1341	1329	1144	1072	1068	1034	1033	1031	999	884	1012	1032	1021	1016	1013	1016	1016	1015	1015	1011	1010	1009	1009	1008	1007	1016	1013	1017	1016	1016	1011	1012	1008	1006	1010	1012	1006	1005	1003	1002	1012	1011	1010	1009	1011	1008	1007	1007	1007
SRS2938662	1338	1324	1138	1067	1064	1029	1028	1026	991	880	1007	1027	1016	1010	1007	1011	1011	1009	1009	1006	1005	1004	1003	1003	1002	1010	1008	1011	1011	1010	1007	1007	1002	1001	1005	1007	1001	999	997	997	1007	1005	1004	1004	1005	1003	1002	1001	1001
min	0
max	1404
avg	631.637
[truncated: 62 more columns]

## Sheet: C2
	SRS2442409	SRS2822480	SRS3944395	SRS3975519
SRS2442409	0	353	351	350
SRS2822480	353	0	42	40
SRS3944395	351	42	0	2
SRS3975519	350	40	2	0
min	2
max	353
avg	189.667

## Sheet: D
	SRS2628542	SRS2709963	SRS2547178	SRS2655760	SRS2442409	SRS3975519	SRS3944395	SRS2822480	SRS2998834	SRS2761300	SRS2998855	SRS3876542	SRS2998913	SRS2609377	SRS3871596	SRS3950101	SRS2420915	SRS2695323	SRS2850289	SRS3010019	SRS3877801	SRS2420931	SRS3643408	SRS3721795	SRS3871610	SRS3021992	SRS3975507	SRS3643364	SRS2609380	SRS2961449	SRS3721793	SRS3877812	SRS3080188	SRS3643397	SRS3597673	SRS3932734	SRS3021995	SRS3277971	SRS2609378	SRS3737739	SRS3676310	SRS2609382	SRS2938638	SRS2938625	SRS3623430	SRS3242649	SRS3944382	SRS2532115	SRS2660207
SRS2628542	0	1183	1429	1289	1379	1343	1341	1342	1172	1291	1308	1292	1291	1293	1292	1292	1292	1291	1287	1287	1287	1286	1284	1281	1295	1294	1294	1290	1288	1286	1287	1283	1289	1284	1282	1280	1279	1290	1288	1284	1285	1284	1284	1287	1286	1284	1281	1287	1284
SRS2709963	1183	0	1388	1251	1347	1312	1312	1308	1135	1253	1275	1259	1257	1261	1259	1259	1258	1258	1251	1254	1254	1253	1251	1248	1264	1263	1262	1260	1258	1259	1259	1250	1256	1251	1249	1247	1246	1256	1256	1253	1253	1252	1254	1250	1252	1251	1246	1253	1250
SRS2547178	1429	1388	0	622	1156	1122	1116	1120	937	1060	1078	1061	1060	1064	1062	1062	1062	1060	1059	1057	1057	1056	1054	1052	1067	1066	1066	1061	1060	1062	1060	1051	1059	1054	1052	1050	1049	1059	1059	1057	1057	1055	1057	1056	1055	1053	1049	1056	1052
SRS2655760	1289	1251	622	0	1015	979	977	977	798	920	938	921	919	924	922	922	922	921	917	917	917	915	914	916	927	926	926	923	921	921	920	915	919	914	912	909	909	919	920	918	917	915	919	916	915	914	912	916	912
SRS2442409	1379	1347	1156	1015	0	356	357	353	889	1006	1024	1007	1006	1010	1008	1008	1008	1007	1004	1003	1003	1002	1000	999	1014	1013	1013	1008	1007	1003	1006	1002	1005	1001	998	996	995	1005	1006	1003	1003	1002	1003	1003	1001	1000	999	1002	999
SRS3975519	1343	1312	1122	979	356	0	2	35	854	974	993	978	975	979	977	977	977	976	972	972	972	971	969	971	982	981	981	976	975	975	975	969	974	970	967	965	964	973	974	972	971	970	974	970	969	968	968	970	967
SRS3944395	1341	1312	1116	977	357	2	0	36	853	970	989	974	971	975	973	973	973	972	969	968	968	967	965	967	979	978	978	974	972	972	973	967	970	966	963	961	960	970	971	969	968	967	972	969	967	965	965	967	964
SRS2822480	1342	1308	1120	977	353	35	36	0	852	970	990	974	971	976	974	974	974	973	968	968	969	968	966	968	980	979	979	974	973	973	973	967	971	967	964	962	961	970	972	970	968	968	971	968	966	966	964	966	964
SRS2998834	1172	1135	937	798	889	854	853	852	0	346	367	355	352	354	352	351	352	351	345	347	347	346	344	349	357	355	355	353	349	352	351	346	349	346	342	340	339	349	350	348	347	346	351	344	347	347	347	346	344
SRS2761300	1291	1253	1060	920	1006	974	970	970	346	0	139	125	122	125	123	123	123	122	118	118	118	117	115	123	130	128	128	126	122	127	126	120	120	117	113	111	110	120	121	119	118	117	122	118	118	118	117	117	115
SRS2998855	1308	1275	1078	938	1024	993	989	990	367	139	0	79	76	40	39	22	40	39	37	35	33	34	32	39	90	88	88	86	83	88	86	80	77	73	70	68	67	77	78	76	75	74	79	77	75	75	76	74	72
SRS3876542	1292	1259	1061	921	1007	978	974	974	355	125	79	0	3	65	63	63	63	62	59	58	58	57	55	64	74	72	72	70	67	71	70	64	64	61	57	55	54	63	64	62	61	60	65	63	61	61	63	59	58
SRS2998913	1291	1257	1060	919	1006	975	971	971	352	122	76	3	0	62	60	60	60	59	57	55	55	54	52	61	71	69	69	67	64	68	67	61	61	58	54	52	51	61	62	60	59	58	63	61	59	59	61	58	56
SRS2609377	1293	1261	1064	924	1010	979	975	976	354	125	40	65	62	0	25	24	26	25	23	21	19	20	18	19	76	74	74	72	69	74	72	67	63	60	56	54	53	63	64	62	61	60	65	63	61	61	63	60	58
SRS3871596	1292	1259	1062	922	1008	977	973	974	352	123	39	63	60	25	0	23	25	24	22	20	18	19	17	25	75	73	73	71	68	73	71	66	62	59	55	53	52	61	62	60	59	58	63	61	59	59	61	58	56
SRS3950101	1292	1259	1062	922	1008	977	973	974	351	123	22	63	60	24	23	0	24	23	21	19	17	18	16	23	74	72	72	70	67	72	70	64	61	57	54	52	51	61	62	60	59	58	63	61	59	59	60	58	56
SRS2420915	1292	1258	1062	922	1008	977	973	974	352	123	40	63	60	26	25	24	0	23	21	19	19	18	16	26	74	72	72	70	67	72	70	65	61	58	54	52	51	61	62	60	59	58	63	61	59	59	61	58	56
SRS2695323	1291	1258	1060	921	1007	976	972	973	351	122	39	62	59	25	24	23	23	0	20	18	18	17	15	24	73	71	71	69	66	71	69	64	60	57	53	51	50	60	61	59	58	57	62	60	58	58	60	57	55
SRS2850289	1287	1251	1059	917	1004	972	969	968	345	118	37	59	57	23	22	21	21	20	0	16	16	15	13	22	71	69	69	66	63	69	66	62	58	55	51	49	48	58	59	57	56	55	60	54	56	56	57	55	53
SRS3010019	1287	1254	1057	917	1003	972	968	968	347	118	35	58	55	21	20	19	19	18	16	0	14	13	11	21	69	67	67	65	62	67	65	60	56	53	49	47	46	56	57	55	54	53	58	56	54	54	55	53	51
SRS3877801	1287	1254	1057	917	1003	972	968	969	347	118	33	58	55	19	18	17	19	18	16	14	0	13	11	18	68	67	67	65	62	67	65	60	56	53	49	47	46	56	57	55	54	53	58	56	54	54	56	53	51
SRS2420931	1286	1253	1056	915	1002	971	967	968	346	117	34	57	54	20	19	18	18	17	15	13	13	0	10	20	68	66	66	64	61	66	64	59	55	52	48	46	45	55	56	54	53	52	57	55	53	53	55	52	50
SRS3643408	1284	1251	1054	914	1000	969	965	966	344	115	32	55	52	18	17	16	16	15	13	11	11	10	0	18	66	64	64	62	59	64	62	57	53	50	46	44	43	53	54	52	51	50	55	53	51	51	53	50	48
SRS3721795	1281	1248	1052	916	999	971	967	968	349	123	39	64	61	19	25	23	26	24	22	21	18	20	18	0	73	71	71	69	66	71	69	65	61	58	55	53	52	62	63	61	60	59	64	62	60	60	62	58	57
SRS3871610	1295	1264	1067	927	1014	982	979	980	357	130	90	74	71	76	75	74	74	73	71	69	68	68	66	73	0	18	17	15	13	18	15	13	59	55	52	50	49	68	68	66	65	64	68	68	65	66	66	65	63
SRS3021992	1294	1263	1066	926	1013	981	978	979	355	128	88	72	69	74	73	72	72	71	69	67	67	66	64	71	18	0	16	14	11	16	14	12	57	54	50	48	47	66	66	64	63	62	67	66	64	64	65	63	61
SRS3975507	1294	1262	1066	926	1013	981	978	979	355	128	88	72	69	74	73	72	72	71	69	67	67	66	64	71	17	16	0	12	9	14	12	10	57	54	50	48	47	66	66	64	63	62	67	66	64	64	65	63	61
SRS3643364	1290	1260	1061	923	1008	976	974	974	353	126	86	70	67	72	71	70	70	69	66	65	65	64	62	69	15	14	12	0	7	12	10	8	55	52	48	46	45	64	64	62	61	60	65	64	62	62	63	61	59
SRS2609380	1288	1258	1060	921	1007	975	972	973	349	122	83	67	64	69	68	67	67	66	63	62	62	61	59	66	13	11	9	7	0	9	7	5	52	49	45	43	42	61	61	59	58	57	62	60	59	59	60	58	56
SRS2961449	1286	1259	1062	921	1003	975	972	973	352	127	88	71	68	74	73	72	72	71	69	67	67	66	64	71	18	16	14	12	9	0	9	10	57	54	50	47	47	65	64	62	62	60	66	65	63	63	64	62	60
SRS3721793	1287	1259	1060	920	1006	975	973	973	351	126	86	70	67	72	71	70	70	69	66	65	65	64	62	69	15	14	12	10	7	9	0	8	55	52	48	46	45	64	63	61	61	59	65	64	62	62	63	61	59
SRS3877812	1283	1250	1051	915	1002	969	967	967	346	120	80	64	61	67	66	64	65	64	62	60	60	59	57	65	13	12	10	8	5	10	8	0	50	47	43	41	40	59	59	57	56	55	60	59	57	57	58	56	54
SRS3080188	1289	1256	1059	919	1005	974	970	971	349	120	77	64	61	63	62	61	61	60	58	56	56	55	53	61	59	57	57	55	52	57	55	50	0	15	17	15	14	58	59	57	56	55	60	58	56	56	58	55	53
SRS3643397	1284	1251	1054	914	1001	970	966	967	346	117	73	61	58	60	59	57	58	57	55	53	53	52	50	58	55	54	54	52	49	54	52	47	15	0	14	12	11	55	56	54	53	52	57	55	53	53	55	52	50
SRS3597673	1282	1249	1052	912	998	967	963	964	342	113	70	57	54	56	55	54	54	53	51	49	49	48	46	55	52	50	50	48	45	50	48	43	17	14	0	6	5	51	52	50	49	48	53	51	49	49	51	48	46
SRS3932734	1280	1247	1050	909	996	965	961	962	340	111	68	55	52	54	53	52	52	51	49	47	47	46	44	53	50	48	48	46	43	47	46	41	15	12	6	0	1	49	50	48	47	46	51	49	47	47	49	46	44
SRS3021995	1279	1246	1049	909	995	964	960	961	339	110	67	54	51	53	52	51	51	50	48	46	46	45	43	52	49	47	47	45	42	47	45	40	14	11	5	1	0	48	49	47	46	45	50	48	46	46	48	45	43
SRS3277971	1290	1256	1059	919	1005	973	970	970	349	120	77	63	61	63	61	61	61	60	58	56	56	55	53	62	68	66	66	64	61	65	64	59	58	55	51	49	48	0	33	31	30	29	34	32	30	30	32	25	27
SRS2609378	1288	1256	1059	920	1006	974	971	972	350	121	78	64	62	64	62	62	62	61	59	57	57	56	54	63	68	66	66	64	61	64	63	59	59	56	52	50	49	33	0	8	23	12	27	33	31	31	33	30	28
SRS3737739	1284	1253	1057	918	1003	972	969	970	348	119	76	62	60	62	60	60	60	59	57	55	55	54	52	61	66	64	64	62	59	62	61	57	57	54	50	48	47	31	8	0	21	10	25	31	29	29	31	28	26
SRS3676310	1285	1253	1057	917	1003	971	968	968	347	118	75	61	59	61	59	59	59	58	56	54	54	53	51	60	65	63	63	61	58	62	61	56	56	53	49	47	46	30	23	21	0	19	24	30	28	28	29	27	25
SRS2609382	1284	1252	1055	915	1002	970	967	968	346	117	74	60	58	60	58	58	58	57	55	53	53	52	50	59	64	62	62	60	57	60	59	55	55	52	48	46	45	29	12	10	19	0	23	29	27	27	29	26	24
SRS2938638	1284	1254	1057	919	1003	974	972	971	351	122	79	65	63	65	63	63	63	62	60	58	58	57	55	64	68	67	67	65	62	66	65	60	60	57	53	51	50	34	27	25	24	23	0	34	32	32	33	31	29
SRS2938625	1287	1250	1056	916	1003	970	969	968	344	118	77	63	61	63	61	61	61	60	54	56	56	55	53	62	68	66	66	64	60	65	64	59	58	55	51	49	48	32	33	31	30	29	34	0	8	8	20	29	25
SRS3623430	1286	1252	1055	915	1001	969	967	966	347	118	75	61	59	61	59	59	59	58	56	54	54	53	51	60	65	64	64	62	59	63	62	57	56	53	49	47	46	30	31	29	28	27	32	8	0	0	17	27	23
SRS3242649	1284	1251	1053	914	1000	968	965	966	347	118	75	61	59	61	59	59	59	58	56	54	54	53	51	60	66	64	64	62	59	63	62	57	56	53	49	47	46	30	31	29	28	27	32	8	0	0	18	27	23
SRS3944382	1281	1246	1049	912	999	968	965	964	347	117	76	63	61	63	61	60	61	60	57	55	56	55	53	62	66	65	65	63	60	64	63	58	58	55	51	49	48	32	33	31	29	29	33	20	17	18	0	28	24
SRS2532115	1287	1253	1056	916	1002	970	967	966	346	117	74	59	58	60	58	58	58	57	55	53	53	52	50	58	65	63	63	61	58	62	61	56	55	52	48	46	45	25	30	28	27	26	31	29	27	27	28	0	24
SRS2660207	1284	1250	1052	912	999	967	964	964	344	115	72	58	56	58	56	56	56	55	53	51	51	50	48	57	63	61	61	59	56	60	59	54	53	50	46	44	43	27	28	26	25	24	29	25	23	23	24	24	0
SRS2845135	1283	1249	1051	912	998	966	963	963	343	114	71	57	55	57	55	55	55	54	52	50	50	49	47	56	62	60	60	58	55	59	58	53	52	49	45	43	42	26	27	25	24	23	28	14	12	12	13	23	19
SRS3799118	1282	1243	1050	911	995	967	963	962	342	115	73	60	57	59	57	57	57	56	51	51	52	51	49	58	64	62	62	60	56	61	60	55	54	51	47	45	44	29	30	28	26	26	30	5	4	5	15	25	21
SRS3721796	1277	1240	1046	909	992	962	960	960	341	112	69	55	53	55	53	53	53	52	50	48	48	47	45	54	57	56	56	54	51	55	54	50	50	47	43	41	40	24	25	23	22	21	26	13	11	11	13	21	17
SRS3703468	1277	1245	1045	909	992	965	962	963	347	120	77	63	61	64	62	61	62	61	58	57	57	56	54	63	65	64	64	62	59	62	61	58	59	56	52	50	49	33	16	14	23	12	27	33	31	31	33	29	28
SRS3753120	1275	1241	1044	910	993	965	963	962	345	118	75	63	60	62	60	59	60	59	56	55	55	54	52	61	64	63	63	61	58	61	60	56	56	53	50	48	47	32	11	9	22	11	26	30	29	29	30	29	27
SRS2926162	1275	1243	1048	909	994	963	962	960	341	114	31	54	51	17	16	15	15	14	12	10	10	9	5	17	64	63	63	61	58	63	61	56	52	49	45	43	42	51	52	50	49	48	53	51	49	49	51	47	46
SRS3623378	1268	1232	1031	898	986	957	955	954	344	119	37	61	58	24	24	21	9	21	18	18	17	17	15	25	69	68	68	65	63	68	66	62	58	55	52	50	49	58	59	58	57	56	61	59	57	57	59	54	54
SRS2442415	1106	1068	879	739	827	791	791	789	611	732	750	735	732	736	734	734	734	733	731	729	729	728	726	730	740	738	739	736	733	734	732	728	731	727	724	722	721	731	732	730	729	728	732	729	727	726	726	728	725
SRS2850296	1282	1253	1072	933	1008	973	972	972	806	926	943	927	925	929	927	927	927	925	924	922	922	921	919	915	932	931	930	928	926	925	924	917	924	919	917	915	914	924	922	920	919	918	918	923	920	918	916	921	918
SRS2628553	1267	1233	1056	917	992	958	957	957	785	910	926	910	908	912	910	910	910	908	905	905	905	904	902	898	914	913	912	910	907	907	906	900	907	902	900	898	897	907	906	904	903	902	903	904	903	901	899	904	901
SRS2783476	1381	1348	1164	1028	1112	1078	1078	1077	906	1025	1043	1028	1025	1029	1027	1027	1027	1026	1024	1022	1022	1021	1018	1016	1030	1029	1029	1025	1023	1022	1020	1016	1024	1020	1017	1015	1014	1024	1022	1020	1019	1018	1019	1023	1019	1019	1017	1020	1016
SRS2998869	1369	1334	1155	1019	1102	1067	1067	1067	894	1013	1031	1016	1013	1017	1015	1015	1015	1014	1012	1010	1010	1009	1006	1005	1018	1017	1017	1013	1011	1010	1008	1004	1012	1008	1005	1003	1002	1012	1010	1008	1007	1006	1007	1011	1007	1007	1006	1008	1004
SRS2895509	1360	1321	1148	1010	1090	1055	1053	1053	883	1003	1022	1007	1004	1008	1006	1006	1006	1005	1002	1000	1001	1000	997	994	1008	1007	1007	1003	1001	998	998	995	1003	999	996	994	993	1003	1001	999	997	997	997	1001	998	998	995	999	994
SRS3453943	1357	1317	1144	1006	1087	1051	1050	1050	877	999	1019	1002	999	1005	1003	1003	1003	1002	1000	998	998	997	994	991	1006	1005	1005	1001	999	996	996	993	1000	996	993	991	990	998	996	994	993	992	993	996	994	993	991	995	990
SRS2998847	1352	1314	1140	1002	1082	1047	1046	1047	873	995	1013	998	995	999	997	997	997	996	994	992	992	991	988	985	1000	999	999	995	993	990	990	987	994	990	987	985	984	994	992	990	989	988	989	992	990	989	988	991	986
SRS3384774	1319	1283	1099	971	1044	1016	1015	1015	850	967	984	969	966	971	968	968	969	968	965	964	964	963	960	964	970	970	970	968	964	962	964	960	964	961	959	957	956	965	963	961	960	959	964	963	962	961	961	961	957
SRS3708648	1377	1342	1167	1027	1108	1074	1073	1073	900	1022	1041	1026	1023	1026	1025	1025	1025	1024	1020	1020	1020	1019	1016	1013	1028	1027	1027	1022	1021	1018	1016	1014	1022	1017	1015	1013	1012	1022	1021	1019	1018	1017	1017	1019	1018	1017	1016	1018	1014
SRS2547237	1369	1335	1157	1017	1101	1066	1065	1065	894	1014	1034	1019	1016	1019	1018	1018	1018	1017	1014	1013	1013	1012	1009	1006	1021	1020	1020	1015	1014	1012	1010	1007	1015	1010	1008	1006	1005	1015	1013	1011	1010	1009	1009	1013	1011	1010	1009	1011	1007
SRS3614303	1382	1349	1174	1032	1116	1077	1076	1077	907	1027	1047	1032	1029	1032	1031	1031	1031	1030	1027	1026	1026	1025	1022	1019	1034	1033	1033	1028	1027	1025	1023	1020	1028	1023	1021	1019	1018	1028	1026	1024	1023	1022	1022	1026	1024	1023	1021	1024	1021
SRS2761182	1377	1344	1169	1027	1111	1072	1071	1072	903	1023	1043	1028	1025	1028	1027	1027	1027	1026	1023	1022	1022	1021	1018	1015	1030	1029	1029	1024	1023	1021	1019	1016	1024	1019	1017	1015	1014	1024	1022	1020	1019	1018	1018	1022	1020	1019	1017	1020	1016
SRS2998915	1370	1340	1164	1020	1106	1070	1069	1067	898	1018	1038	1023	1020	1023	1022	1022	1022	1021	1018	1017	1017	1016	1013	1010	1025	1024	1024	1020	1018	1016	1015	1012	1019	1014	1012	1010	1009	1019	1018	1016	1015	1014	1015	1017	1016	1014	1013	1015	1011
SRS3932840	1372	1340	1164	1021	1106	1070	1069	1068	899	1019	1039	1024	1021	1024	1023	1023	1023	1022	1019	1018	1018	1017	1014	1011	1026	1025	1025	1020	1019	1017	1015	1012	1020	1015	1013	1011	1010	1020	1018	1016	1015	1014	1014	1018	1016	1015	1014	1016	1012
SRS3218596	1371	1338	1163	1022	1105	1070	1069	1068	896	1018	1038	1023	1020	1023	1022	1022	1022	1021	1016	1017	1017	1016	1013	1011	1025	1024	1024	1019	1018	1016	1014	1011	1019	1014	1012	1010	1009	1019	1017	1015	1014	1013	1013	1015	1015	1014	1013	1015	1011
SRS2547417	1370	1337	1163	1021	1105	1070	1069	1066	898	1018	1038	1023	1020	1023	1022	1022	1022	1021	1018	1017	1017	1016	1013	1010	1025	1024	1024	1019	1018	1016	1014	1011	1019	1014	1012	1010	1009	1019	1017	1015	1014	1013	1013	1017	1015	1014	1012	1015	1011
SRS3703451	1372	1339	1164	1021	1106	1070	1069	1068	896	1018	1037	1022	1019	1022	1021	1021	1021	1020	1016	1016	1016	1015	1012	1008	1024	1023	1023	1018	1017	1015	1013	1009	1018	1013	1011	1009	1008	1018	1017	1015	1014	1013	1013	1015	1014	1013	1012	1014	1010
SRS2845130	1374	1341	1166	1023	1108	1072	1071	1069	896	1016	1036	1021	1018	1021	1020	1020	1020	1019	1016	1015	1015	1014	1011	1008	1023	1022	1022	1017	1016	1014	1012	1009	1017	1012	1010	1008	1007	1017	1015	1013	1012	1011	1011	1015	1013	1012	1010	1013	1009
SRS3703452	1372	1341	1166	1022	1107	1072	1071	1068	898	1018	1038	1023	1020	1023	1022	1022	1022	1021	1018	1017	1017	1016	1013	1010	1025	1024	1024	1020	1018	1016	1015	1012	1019	1014	1012	1010	1009	1019	1017	1015	1014	1013	1014	1017	1016	1014	1012	1015	1011
SRS3871671	1371	1339	1163	1020	1105	1069	1069	1067	898	1018	1038	1023	1020	1024	1022	1022	1022	1021	1018	1017	1017	1016	1013	1010	1025	1024	1024	1020	1018	1016	1015	1011	1019	1014	1012	1010	1009	1019	1017	1015	1014	1013	1014	1017	1015	1014	1013	1015	1011
SRS2938629	1371	1340	1164	1020	1106	1070	1069	1066	899	1019	1039	1024	1021	1024	1023	1023	1023	1022	1019	1018	1018	1017	1014	1011	1025	1024	1024	1019	1018	1016	1014	1011	1020	1015	1013	1011	1010	1019	1018	1016	1015	1014	1014	1017	1015	1014	1012	1015	1011
SRS3570561	1369	1337	1160	1019	1102	1068	1067	1066	895	1018	1037	1021	1018	1022	1021	1021	1021	1020	1016	1016	1016	1015	1012	1009	1024	1023	1023	1018	1017	1015	1013	1010	1018	1013	1011	1009	1008	1018	1016	1014	1013	1012	1012	1015	1014	1013	1012	1014	1010
SRS2998873	1370	1337	1161	1019	1101	1068	1067	1066	894	1017	1036	1021	1018	1021	1020	1020	1020	1019	1015	1015	1015	1014	1011	1008	1022	1021	1021	1016	1015	1013	1011	1008	1017	1012	1010	1008	1007	1017	1015	1013	1012	1011	1011	1014	1013	1012	1011	1012	1009
SRS3876540	1369	1335	1161	1019	1103	1064	1063	1065	894	1014	1034	1019	1016	1019	1018	1018	1018	1017	1014	1013	1013	1012	1009	1006	1021	1020	1020	1015	1014	1012	1010	1007	1015	1010	1008	1006	1005	1015	1013	1011	1010	1009	1009	1013	1011	1010	1009	1011	1006
SRS2525483	1369	1335	1160	1019	1103	1066	1064	1067	894	1014	1034	1019	1016	1019	1018	1018	1018	1017	1014	1013	1013	1012	1009	1006	1021	1019	1020	1015	1014	1012	1010	1007	1015	1010	1008	1006	1005	1015	1013	1011	1010	1009	1009	1013	1011	1010	1009	1011	1007
SRS3892739	1371	1333	1158	1019	1101	1065	1064	1066	894	1014	1034	1019	1016	1019	1018	1018	1018	1017	1014	1013	1013	1012	1009	1006	1020	1019	1019	1014	1013	1011	1009	1007	1015	1010	1008	1006	1005	1015	1013	1011	1010	1009	1009	1013	1011	1010	1009	1011	1007
SRS2420927	1371	1338	1163	1018	1103	1067	1066	1065	896	1016	1036	1021	1018	1021	1020	1020	1020	1019	1016	1015	1015	1014	1011	1008	1023	1022	1022	1017	1016	1014	1012	1009	1017	1012	1010	1008	1007	1017	1015	1013	1012	1011	1011	1015	1013	1012	1011	1013	1009
SRS3877810	1367	1336	1160	1016	1102	1066	1066	1064	896	1015	1035	1020	1017	1021	1019	1019	1019	1018	1015	1014	1014	1013	1010	1008	1022	1021	1021	1017	1015	1014	1012	1009	1016	1012	1009	1007	1006	1015	1014	1012	1011	1010	1011	1013	1011	1010	1009	1010	1007
SRS3703470	1368	1336	1161	1018	1103	1067	1066	1064	896	1016	1036	1021	1018	1021	1020	1020	1020	1019	1016	1015	1015	1014	1011	1008	1023	1022	1022	1017	1016	1014	1012	1009	1017	1012	1010	1008	1007	1017	1016	1014	1013	1012	1012	1015	1013	1012	1010	1013	1009
SRS2628565	1364	1331	1156	1013	1098	1062	1061	1059	887	1007	1027	1012	1009	1012	1011	1011	1011	1010	1007	1006	1006	1005	1002	999	1014	1013	1013	1008	1007	1005	1003	1000	1008	1003	1001	999	998	1008	1006	1004	1003	1002	1002	1006	1004	1003	1001	1004	1000
SRS3453937	1369	1332	1155	1019	1103	1067	1067	1065	895	1016	1035	1020	1017	1021	1019	1019	1019	1018	1016	1014	1014	1013	1010	1008	1020	1019	1019	1015	1013	1011	1010	1006	1016	1011	1009	1007	1006	1016	1014	1012	1011	1010	1011	1014	1012	1011	1010	1012	1008
SRS2938622	1372	1334	1160	1021	1104	1068	1067	1066	894	1016	1035	1020	1017	1020	1019	1019	1019	1018	1016	1014	1014	1013	1010	1007	1022	1021	1021	1016	1015	1013	1011	1008	1016	1011	1009	1007	1006	1016	1015	1013	1012	1011	1011	1014	1012	1011	1009	1012	1008
SRS3471904	1369	1333	1157	1018	1100	1066	1066	1065	891	1014	1033	1018	1015	1019	1017	1017	1017	1016	1011	1012	1012	1011	1008	1005	1019	1018	1018	1014	1012	1010	1009	1005	1014	1009	1007	1005	1004	1014	1013	1011	1010	1009	1010	1011	1010	1009	1008	1010	1006
SRS3007170	1371	1333	1158	1021	1103	1068	1067	1066	892	1013	1031	1017	1014	1018	1016	1015	1016	1015	1013	1011	1011	1010	1007	1004	1018	1017	1017	1013	1011	1009	1008	1004	1013	1008	1006	1004	1003	1013	1011	1009	1008	1007	1008	1011	1009	1008	1006	1009	1005
SRS2938662	1360	1323	1153	1014	1095	1062	1061	1059	883	1001	1022	1007	1004	1008	1006	1006	1006	1005	1001	1000	1001	1000	997	996	1008	1007	1007	1003	1001	999	998	994	1003	999	996	994	993	1002	1000	998	996	996	996	1000	997	997	995	997	993
SRS3742747	1349	1314	1135	1008	1085	1053	1053	1051	878	997	1016	1001	998	1002	1000	1000	1000	999	997	995	995	994	991	996	1001	1000	1000	997	994	993	991	990	996	992	990	988	987	997	995	993	992	991	994	995	993	993	993	993	990
SRS3643394	1377	1343	1167	1027	1109	1074	1073	1073	900	1021	1040	1025	1022	1025	1024	1024	1024	1023	1020	1019	1019	1018	1015	1012	1027	1026	1026	1021	1020	1017	1016	1013	1021	1016	1014	1012	1011	1021	1019	1017	1016	1015	1015	1019	1017	1016	1015	1017	1013
SRS3871678	1372	1338	1162	1022	1103	1069	1068	1068	897	1017	1037	1022	1019	1022	1021	1021	1021	1020	1017	1016	1016	1015	1012	1009	1024	1023	1023	1018	1017	1014	1013	1010	1018	1013	1011	1009	1008	1018	1016	1014	1013	1012	1012	1016	1014	1013	1012	1014	1010
SRS3721753	1371	1337	1161	1021	1103	1068	1067	1067	896	1016	1036	1021	1018	1021	1020	1020	1020	1019	1016	1015	1015	1014	1011	1008	1023	1022	1022	1017	1016	1013	1012	1009	1017	1012	1010	1008	1007	1017	1015	1013	1012	1011	1011	1015	1013	1012	1011	1013	1009
SRS3471848	1369	1335	1159	1019	1099	1064	1063	1063	892	1014	1034	1019	1016	1019	1018	1018	1018	1017	1014	1013	1013	1012	1009	1006	1021	1020	1020	1015	1014	1011	1010	1007	1015	1010	1008	1006	1005	1015	1013	1011	1010	1009	1009	1013	1011	1010	1009	1011	1007
SRS3080280	1369	1339	1159	1019	1101	1066	1065	1065	894	1014	1033	1018	1015	1018	1017	1017	1017	1016	1014	1012	1012	1011	1008	1005	1020	1019	1019	1014	1014	1010	1009	1006	1014	1009	1007	1005	1004	1014	1012	1010	1009	1008	1008	1013	1010	1009	1008	1010	1006
SRS3855333	1367	1333	1157	1017	1099	1064	1063	1063	892	1012	1032	1017	1014	1017	1016	1016	1016	1015	1012	1011	1011	1010	1007	1004	1019	1018	1018	1013	1012	1009	1008	1005	1013	1008	1006	1004	1003	1013	1012	1010	1009	1008	1008	1011	1009	1008	1007	1009	1005
SRS3080274	1365	1334	1155	1016	1097	1062	1061	1060	891	1010	1029	1014	1011	1014	1013	1013	1013	1012	1010	1008	1008	1007	1004	1003	1016	1015	1015	1010	1010	1006	1005	1004	1009	1004	1003	1001	1000	1009	1008	1006	1005	1004	1004	1009	1006	1005	1003	1006	1002
SRS3614304	1370	1336	1160	1021	1103	1068	1067	1067	892	1012	1032	1017	1014	1017	1016	1016	1016	1015	1012	1011	1011	1010	1007	1005	1019	1018	1018	1013	1012	1008	1008	1005	1013	1008	1006	1004	1003	1013	1012	1010	1009	1008	1008	1011	1009	1008	1007	1009	1005
SRS3932748	1370	1335	1159	1020	1102	1067	1066	1066	893	1013	1033	1018	1015	1018	1017	1017	1017	1016	1013	1012	1012	1011	1008	1005	1020	1019	1019	1014	1013	1010	1009	1006	1014	1009	1007	1005	1004	1014	1012	1010	1009	1008	1008	1012	1010	1009	1008	1010	1006
SRS3531727	1368	1334	1157	1018	1099	1065	1064	1064	891	1011	1031	1016	1013	1016	1015	1015	1015	1014	1011	1010	1010	1009	1006	1003	1018	1017	1017	1012	1011	1008	1007	1004	1012	1007	1005	1003	1002	1012	1011	1009	1008	1007	1007	1010	1008	1007	1006	1008	1004
SRS3007164	1368	1334	1158	1018	1100	1065	1064	1065	892	1011	1031	1016	1013	1016	1015	1015	1015	1014	1011	1010	1010	1009	1006	1004	1018	1017	1017	1012	1011	1008	1007	1005	1012	1008	1005	1003	1002	1012	1011	1009	1008	1007	1007	1010	1008	1007	1006	1008	1004
SRS2660215	1367	1331	1156	1018	1099	1065	1063	1063	892	1009	1030	1015	1012	1015	1014	1014	1014	1013	1009	1008	1009	1008	1005	1005	1017	1016	1016	1011	1010	1007	1006	1006	1011	1007	1004	1002	1001	1011	1009	1007	1005	1005	1004	1009	1006	1006	1003	1006	1002
SRS2761294	1369	1334	1159	1020	1102	1067	1065	1066	890	1010	1030	1015	1012	1015	1014	1014	1014	1013	1010	1009	1009	1008	1005	1002	1017	1016	1016	1011	1010	1007	1006	1003	1011	1006	1004	1002	1001	1011	1009	1007	1006	1005	1005	1009	1007	1006	1005	1007	1003
SRS2609391	1360	1327	1151	1013	1093	1058	1058	1056	888	1007	1027	1012	1009	1012	1011	1011	1011	1010	1007	1006	1006	1005	1002	1002	1012	1011	1011	1006	1005	1002	1002	1000	1008	1003	1001	999	998	1008	1006	1004	1003	1002	1003	1006	1004	1003	1001	1004	1000
SRS3742753	1362	1327	1153	1014	1095	1061	1060	1059	888	1008	1028	1013	1010	1013	1012	1012	1012	1011	1008	1007	1007	1006	1003	1001	1014	1013	1013	1008	1007	1004	1003	1001	1009	1004	1002	1000	999	1009	1008	1006	1005	1004	1004	1007	1005	1004	1002	1005	1001
SRS3643366	1364	1330	1154	1014	1096	1061	1060	1060	887	1007	1027	1012	1009	1012	1011	1011	1011	1010	1007	1006	1006	1005	1002	999	1014	1013	1013	1008	1007	1004	1003	1000	1008	1003	1001	999	998	1008	1006	1004	1003	1002	1002	1006	1004	1003	1002	1004	1000
SRS2922972	1361	1326	1151	1013	1092	1059	1057	1055	887	1004	1024	1010	1007	1011	1009	1008	1009	1008	1004	1003	1004	1003	1001	1000	1012	1011	1011	1008	1005	1002	1003	998	1006	1001	999	997	996	1006	1004	1002	1000	1000	1002	1004	1001	1001	999	1000	997
SRS3531728	1354	1318	1135	1004	1083	1053	1053	1052	878	996	1013	998	995	1000	998	997	998	997	993	993	993	992	989	993	1001	1000	1000	998	994	992	992	993	995	992	988	986	985	993	992	990	989	988	991	992	991	990	990	990	986
min	0
max	1429
avg	630.162
[truncated: 62 more columns]

## Sheet: D2
	SRS2998834	SRS2761300	SRS2998855	SRS3876542	SRS2998913	SRS2609377	SRS3871596	SRS3950101	SRS2420915	SRS2695323	SRS2850289	SRS3010019	SRS3877801	SRS2420931	SRS3643408	SRS3721795	SRS3871610	SRS3021992	SRS3975507	SRS3643364	SRS2609380	SRS2961449	SRS3721793	SRS3877812	SRS3080188	SRS3643397	SRS3597673	SRS3932734	SRS3021995	SRS3277971	SRS2609378	SRS3737739	SRS3676310	SRS2609382	SRS2938638	SRS2938625	SRS3623430	SRS3242649	SRS3944382	SRS2532115	SRS2660207	SRS2845135	SRS3799118	SRS3721796	SRS3703468	SRS3753120	SRS2926162	SRS3623378
SRS2998834	0	346	367	355	352	354	352	351	352	351	345	347	347	346	344	349	357	355	355	353	349	352	351	346	349	346	342	340	339	349	350	348	347	346	351	344	347	347	347	346	344	343	342	341	347	345	341	344
SRS2761300	346	0	139	125	122	125	123	123	123	122	118	118	118	117	115	123	130	128	128	126	122	127	126	120	120	117	113	111	110	120	121	119	118	117	122	118	118	118	117	117	115	114	115	112	120	118	114	119
SRS2998855	367	139	0	79	76	40	39	22	40	39	37	35	33	34	32	39	90	88	88	86	83	88	86	80	77	73	70	68	67	77	78	76	75	74	79	77	75	75	76	74	72	71	73	69	77	75	31	37
SRS3876542	355	125	79	0	3	65	63	63	63	62	59	58	58	57	55	64	74	72	72	70	67	71	70	64	64	61	57	55	54	63	64	62	61	60	65	63	61	61	63	59	58	57	60	55	63	63	54	61
SRS2998913	352	122	76	3	0	62	60	60	60	59	57	55	55	54	52	61	71	69	69	67	64	68	67	61	61	58	54	52	51	61	62	60	59	58	63	61	59	59	61	58	56	55	57	53	61	60	51	58
SRS2609377	354	125	40	65	62	0	25	24	26	25	23	21	19	20	18	19	76	74	74	72	69	74	72	67	63	60	56	54	53	63	64	62	61	60	65	63	61	61	63	60	58	57	59	55	64	62	17	24
SRS3871596	352	123	39	63	60	25	0	23	25	24	22	20	18	19	17	25	75	73	73	71	68	73	71	66	62	59	55	53	52	61	62	60	59	58	63	61	59	59	61	58	56	55	57	53	62	60	16	24
SRS3950101	351	123	22	63	60	24	23	0	24	23	21	19	17	18	16	23	74	72	72	70	67	72	70	64	61	57	54	52	51	61	62	60	59	58	63	61	59	59	60	58	56	55	57	53	61	59	15	21
SRS2420915	352	123	40	63	60	26	25	24	0	23	21	19	19	18	16	26	74	72	72	70	67	72	70	65	61	58	54	52	51	61	62	60	59	58	63	61	59	59	61	58	56	55	57	53	62	60	15	9
SRS2695323	351	122	39	62	59	25	24	23	23	0	20	18	18	17	15	24	73	71	71	69	66	71	69	64	60	57	53	51	50	60	61	59	58	57	62	60	58	58	60	57	55	54	56	52	61	59	14	21
SRS2850289	345	118	37	59	57	23	22	21	21	20	0	16	16	15	13	22	71	69	69	66	63	69	66	62	58	55	51	49	48	58	59	57	56	55	60	54	56	56	57	55	53	52	51	50	58	56	12	18
SRS3010019	347	118	35	58	55	21	20	19	19	18	16	0	14	13	11	21	69	67	67	65	62	67	65	60	56	53	49	47	46	56	57	55	54	53	58	56	54	54	55	53	51	50	51	48	57	55	10	18
SRS3877801	347	118	33	58	55	19	18	17	19	18	16	14	0	13	11	18	68	67	67	65	62	67	65	60	56	53	49	47	46	56	57	55	54	53	58	56	54	54	56	53	51	50	52	48	57	55	10	17
SRS2420931	346	117	34	57	54	20	19	18	18	17	15	13	13	0	10	20	68	66	66	64	61	66	64	59	55	52	48	46	45	55	56	54	53	52	57	55	53	53	55	52	50	49	51	47	56	54	9	17
SRS3643408	344	115	32	55	52	18	17	16	16	15	13	11	11	10	0	18	66	64	64	62	59	64	62	57	53	50	46	44	43	53	54	52	51	50	55	53	51	51	53	50	48	47	49	45	54	52	5	15
SRS3721795	349	123	39	64	61	19	25	23	26	24	22	21	18	20	18	0	73	71	71	69	66	71	69	65	61	58	55	53	52	62	63	61	60	59	64	62	60	60	62	58	57	56	58	54	63	61	17	25
SRS3871610	357	130	90	74	71	76	75	74	74	73	71	69	68	68	66	73	0	18	17	15	13	18	15	13	59	55	52	50	49	68	68	66	65	64	68	68	65	66	66	65	63	62	64	57	65	64	64	69
SRS3021992	355	128	88	72	69	74	73	72	72	71	69	67	67	66	64	71	18	0	16	14	11	16	14	12	57	54	50	48	47	66	66	64	63	62	67	66	64	64	65	63	61	60	62	56	64	63	63	68
SRS3975507	355	128	88	72	69	74	73	72	72	71	69	67	67	66	64	71	17	16	0	12	9	14	12	10	57	54	50	48	47	66	66	64	63	62	67	66	64	64	65	63	61	60	62	56	64	63	63	68
SRS3643364	353	126	86	70	67	72	71	70	70	69	66	65	65	64	62	69	15	14	12	0	7	12	10	8	55	52	48	46	45	64	64	62	61	60	65	64	62	62	63	61	59	58	60	54	62	61	61	65
SRS2609380	349	122	83	67	64	69	68	67	67	66	63	62	62	61	59	66	13	11	9	7	0	9	7	5	52	49	45	43	42	61	61	59	58	57	62	60	59	59	60	58	56	55	56	51	59	58	58	63
SRS2961449	352	127	88	71	68	74	73	72	72	71	69	67	67	66	64	71	18	16	14	12	9	0	9	10	57	54	50	47	47	65	64	62	62	60	66	65	63	63	64	62	60	59	61	55	62	61	63	68
SRS3721793	351	126	86	70	67	72	71	70	70	69	66	65	65	64	62	69	15	14	12	10	7	9	0	8	55	52	48	46	45	64	63	61	61	59	65	64	62	62	63	61	59	58	60	54	61	60	61	66
SRS3877812	346	120	80	64	61	67	66	64	65	64	62	60	60	59	57	65	13	12	10	8	5	10	8	0	50	47	43	41	40	59	59	57	56	55	60	59	57	57	58	56	54	53	55	50	58	56	56	62
SRS3080188	349	120	77	64	61	63	62	61	61	60	58	56	56	55	53	61	59	57	57	55	52	57	55	50	0	15	17	15	14	58	59	57	56	55	60	58	56	56	58	55	53	52	54	50	59	56	52	58
SRS3643397	346	117	73	61	58	60	59	57	58	57	55	53	53	52	50	58	55	54	54	52	49	54	52	47	15	0	14	12	11	55	56	54	53	52	57	55	53	53	55	52	50	49	51	47	56	53	49	55
SRS3597673	342	113	70	57	54	56	55	54	54	53	51	49	49	48	46	55	52	50	50	48	45	50	48	43	17	14	0	6	5	51	52	50	49	48	53	51	49	49	51	48	46	45	47	43	52	50	45	52
SRS3932734	340	111	68	55	52	54	53	52	52	51	49	47	47	46	44	53	50	48	48	46	43	47	46	41	15	12	6	0	1	49	50	48	47	46	51	49	47	47	49	46	44	43	45	41	50	48	43	50
SRS3021995	339	110	67	54	51	53	52	51	51	50	48	46	46	45	43	52	49	47	47	45	42	47	45	40	14	11	5	1	0	48	49	47	46	45	50	48	46	46	48	45	43	42	44	40	49	47	42	49
SRS3277971	349	120	77	63	61	63	61	61	61	60	58	56	56	55	53	62	68	66	66	64	61	65	64	59	58	55	51	49	48	0	33	31	30	29	34	32	30	30	32	25	27	26	29	24	33	32	51	58
SRS2609378	350	121	78	64	62	64	62	62	62	61	59	57	57	56	54	63	68	66	66	64	61	64	63	59	59	56	52	50	49	33	0	8	23	12	27	33	31	31	33	30	28	27	30	25	16	11	52	59
SRS3737739	348	119	76	62	60	62	60	60	60	59	57	55	55	54	52	61	66	64	64	62	59	62	61	57	57	54	50	48	47	31	8	0	21	10	25	31	29	29	31	28	26	25	28	23	14	9	50	58
SRS3676310	347	118	75	61	59	61	59	59	59	58	56	54	54	53	51	60	65	63	63	61	58	62	61	56	56	53	49	47	46	30	23	21	0	19	24	30	28	28	29	27	25	24	26	22	23	22	49	57
SRS2609382	346	117	74	60	58	60	58	58	58	57	55	53	53	52	50	59	64	62	62	60	57	60	59	55	55	52	48	46	45	29	12	10	19	0	23	29	27	27	29	26	24	23	26	21	12	11	48	56
SRS2938638	351	122	79	65	63	65	63	63	63	62	60	58	58	57	55	64	68	67	67	65	62	66	65	60	60	57	53	51	50	34	27	25	24	23	0	34	32	32	33	31	29	28	30	26	27	26	53	61
SRS2938625	344	118	77	63	61	63	61	61	61	60	54	56	56	55	53	62	68	66	66	64	60	65	64	59	58	55	51	49	48	32	33	31	30	29	34	0	8	8	20	29	25	14	5	13	33	30	51	59
SRS3623430	347	118	75	61	59	61	59	59	59	58	56	54	54	53	51	60	65	64	64	62	59	63	62	57	56	53	49	47	46	30	31	29	28	27	32	8	0	0	17	27	23	12	4	11	31	29	49	57
SRS3242649	347	118	75	61	59	61	59	59	59	58	56	54	54	53	51	60	66	64	64	62	59	63	62	57	56	53	49	47	46	30	31	29	28	27	32	8	0	0	18	27	23	12	5	11	31	29	49	57
SRS3944382	347	117	76	63	61	63	61	60	61	60	57	55	56	55	53	62	66	65	65	63	60	64	63	58	58	55	51	49	48	32	33	31	29	29	33	20	17	18	0	28	24	13	15	13	33	30	51	59
SRS2532115	346	117	74	59	58	60	58	58	58	57	55	53	53	52	50	58	65	63	63	61	58	62	61	56	55	52	48	46	45	25	30	28	27	26	31	29	27	27	28	0	24	23	25	21	29	29	47	54
SRS2660207	344	115	72	58	56	58	56	56	56	55	53	51	51	50	48	57	63	61	61	59	56	60	59	54	53	50	46	44	43	27	28	26	25	24	29	25	23	23	24	24	0	19	21	17	28	27	46	54
SRS2845135	343	114	71	57	55	57	55	55	55	54	52	50	50	49	47	56	62	60	60	58	55	59	58	53	52	49	45	43	42	26	27	25	24	23	28	14	12	12	13	23	19	0	10	7	27	25	45	53
SRS3799118	342	115	73	60	57	59	57	57	57	56	51	51	52	51	49	58	64	62	62	60	56	61	60	55	54	51	47	45	44	29	30	28	26	26	30	5	4	5	15	25	21	10	0	10	30	26	48	55
SRS3721796	341	112	69	55	53	55	53	53	53	52	50	48	48	47	45	54	57	56	56	54	51	55	54	50	50	47	43	41	40	24	25	23	22	21	26	13	11	11	13	21	17	7	10	0	25	24	43	51
SRS3703468	347	120	77	63	61	64	62	61	62	61	58	57	57	56	54	63	65	64	64	62	59	62	61	58	59	56	52	50	49	33	16	14	23	12	27	33	31	31	33	29	28	27	30	25	0	15	52	60
SRS3753120	345	118	75	63	60	62	60	59	60	59	56	55	55	54	52	61	64	63	63	61	58	61	60	56	56	53	50	48	47	32	11	9	22	11	26	30	29	29	30	29	27	25	26	24	15	0	51	58
SRS2926162	341	114	31	54	51	17	16	15	15	14	12	10	10	9	5	17	64	63	63	61	58	63	61	56	52	49	45	43	42	51	52	50	49	48	53	51	49	49	51	47	46	45	48	43	52	51	0	14
SRS3623378	344	119	37	61	58	24	24	21	9	21	18	18	17	17	15	25	69	68	68	65	63	68	66	62	58	55	52	50	49	58	59	58	57	56	61	59	57	57	59	54	54	53	55	51	60	58	14	0
min	0
max	367
average	64.2828

## Sheet: E
	SRS2850296	SRS2628553	SRS2783476	SRS2998869	SRS2895509	SRS3453943	SRS3384774	SRS2998847	SRS2547237	SRS3708648	SRS3643394	SRS3531728	SRS3471848	SRS3871678	SRS3614304	SRS3721753	SRS2761294	SRS3080280	SRS3080274	SRS2609391	SRS3855333	SRS2922972	SRS3007164	SRS2660215	SRS3531727	SRS3932748	SRS3742753	SRS3643366	SRS3614303	SRS2420927	SRS2845130	SRS2761182	SRS2525483	SRS3932840	SRS3218596	SRS2998915	SRS3876540	SRS2547417	SRS3570561	SRS2938629	SRS3892739	SRS3703451	SRS2998873	SRS3703452	SRS3871671	SRS3877810	SRS3703470	SRS2628565	SRS3453937
SRS2850296	0	99	618	605	598	593	594	592	605	610	616	606	608	607	608	610	609	609	607	608	606	608	610	607	604	604	604	602	618	616	613	616	612	610	608	608	603	609	610	607	612	609	610	613	604	603	603	603	614
SRS2628553	99	0	596	582	576	571	571	569	582	586	593	584	585	585	586	588	587	587	585	585	584	585	588	584	582	582	582	580	596	594	592	593	589	588	585	586	581	586	586	585	590	586	588	591	582	582	581	580	587
SRS2783476	618	596	0	20	227	224	224	221	248	245	251	240	241	241	242	243	243	244	241	240	241	240	244	242	241	240	238	236	252	252	249	249	248	247	246	244	241	244	246	243	246	244	243	248	243	240	240	241	246
SRS2998869	605	582	20	0	215	211	211	208	236	233	239	228	229	229	231	231	231	231	229	229	229	229	232	230	229	227	226	224	240	240	237	237	236	234	235	233	230	232	234	231	235	231	231	236	230	229	228	228	235
SRS2895509	598	576	227	215	0	11	11	9	225	215	224	212	214	216	216	217	216	216	216	214	216	213	217	216	213	213	213	209	227	225	224	223	223	220	216	218	220	218	217	216	220	213	213	221	216	215	214	214	217
SRS3453943	593	571	224	211	11	0	0	5	221	212	219	209	211	213	212	214	213	213	213	211	212	210	214	213	209	209	210	205	224	222	221	219	220	215	212	214	216	215	213	213	217	210	209	218	210	211	209	211	214
SRS3384774	594	571	224	211	11	0	0	6	221	211	218	209	210	212	211	213	212	213	213	210	211	209	214	212	208	208	209	204	223	221	220	219	219	214	211	212	215	214	212	211	215	209	207	217	210	211	208	210	213
SRS2998847	592	569	221	208	9	5	6	0	218	210	219	207	208	211	211	210	211	211	211	208	210	208	212	210	208	207	207	204	222	219	219	216	217	214	210	212	214	212	211	211	214	207	207	216	211	208	208	208	211
SRS2547237	605	582	248	236	225	221	221	218	0	72	78	68	61	69	70	66	65	66	64	61	63	64	67	62	66	64	60	62	78	72	70	70	68	70	67	67	63	64	69	68	66	70	69	70	69	64	65	60	72
SRS3708648	610	586	245	233	215	212	211	210	72	0	73	62	61	66	65	65	64	64	63	62	61	61	64	63	62	63	60	59	76	72	71	71	69	68	66	66	65	65	66	67	67	66	65	67	67	63	64	61	66
SRS3643394	616	593	251	239	224	219	218	219	78	73	0	31	37	35	33	38	36	37	36	35	33	32	36	35	30	31	31	27	79	79	76	77	75	71	73	70	72	71	75	70	74	71	67	73	69	70	66	67	77
SRS3531728	606	584	240	228	212	209	209	207	68	62	31	0	26	24	23	27	25	25	24	24	23	21	25	24	20	21	20	17	68	68	66	66	64	62	64	61	63	60	65	59	63	60	58	62	59	60	57	56	66
SRS3471848	608	585	241	229	214	211	210	208	61	61	37	26	0	28	29	27	25	26	25	23	23	22	25	24	24	24	21	20	67	63	62	61	60	59	59	58	58	56	60	58	58	61	58	58	58	55	56	52	62
SRS3871678	607	585	241	229	216	213	212	211	69	66	35	24	28	0	17	18	17	17	16	16	14	13	17	16	14	15	11	11	72	70	67	68	65	64	66	63	63	62	66	63	65	63	62	64	64	61	61	58	68
SRS3614304	608	586	242	231	216	212	211	211	70	65	33	23	29	17	0	16	14	18	17	17	16	14	6	5	5	6	13	10	71	71	68	69	67	64	67	64	66	63	68	62	66	63	61	65	62	63	59	59	69
SRS3721753	610	588	243	231	217	214	213	210	66	65	38	27	27	18	16	0	12	16	14	14	13	14	12	10	11	10	13	11	73	68	67	65	66	65	64	62	61	61	64	63	63	66	63	64	63	58	59	57	67
SRS2761294	609	587	243	231	216	213	212	211	65	64	36	25	25	17	14	12	0	14	13	12	12	11	10	9	9	9	10	9	70	66	65	65	63	62	62	60	60	59	63	61	61	64	60	61	61	58	59	55	65
SRS3080280	609	587	244	231	216	213	213	211	66	64	37	25	26	17	18	16	14	0	1	11	12	12	14	14	13	13	9	9	70	66	65	65	63	62	62	61	60	60	63	61	61	64	61	61	61	58	59	56	65
SRS3080274	607	585	241	229	216	213	213	211	64	63	36	24	25	16	17	14	13	1	0	10	10	11	13	13	12	12	8	8	69	65	63	64	62	61	61	60	58	59	62	60	60	63	60	60	60	56	58	55	64
SRS2609391	608	585	240	229	214	211	210	208	61	62	35	24	23	16	17	14	12	11	10	0	11	10	13	11	12	11	9	8	69	64	62	62	62	61	59	59	58	57	61	59	59	62	60	60	59	56	57	53	64
SRS3855333	606	584	241	229	216	212	211	210	63	61	33	23	23	14	16	13	12	12	10	11	0	9	11	10	11	10	8	6	68	65	63	62	61	59	61	60	58	57	61	59	60	62	59	59	59	55	56	53	62
SRS2922972	608	585	240	229	213	210	209	208	64	61	32	21	22	13	14	14	11	12	11	10	9	0	11	10	9	10	5	4	67	64	61	62	60	59	60	58	58	56	61	58	59	61	57	58	59	56	56	52	62
SRS3007164	610	588	244	232	217	214	214	212	67	64	36	25	25	17	6	12	10	14	13	13	11	11	0	1	5	5	10	9	70	67	65	65	63	62	63	61	61	59	64	61	62	64	60	61	61	58	60	55	65
SRS2660215	607	584	242	230	216	213	212	210	62	63	35	24	24	16	5	10	9	14	13	11	10	10	1	0	4	4	9	8	69	65	64	63	62	61	60	59	58	58	61	60	60	62	59	60	60	56	58	54	64
SRS3531727	604	582	241	229	213	209	208	208	66	62	30	20	24	14	5	11	9	13	12	12	11	9	5	4	0	3	8	7	68	66	64	64	62	59	62	59	60	58	62	59	61	59	58	60	59	58	56	54	64
SRS3932748	604	582	240	227	213	209	208	207	64	63	31	21	24	15	6	10	9	13	12	11	10	10	5	4	3	0	8	8	69	65	64	63	61	60	61	59	58	58	62	60	60	61	59	60	59	56	56	54	64
SRS3742753	604	582	238	226	213	210	209	207	60	60	31	20	21	11	13	13	10	9	8	9	8	5	10	9	8	8	0	3	65	63	59	60	57	57	59	56	56	54	60	56	58	59	55	56	57	55	55	50	61
SRS3643366	602	580	236	224	209	205	204	204	62	59	27	17	20	11	10	11	9	9	8	8	6	4	9	8	7	8	3	0	65	62	60	60	58	56	58	55	56	54	59	56	57	57	54	56	56	53	53	50	60
SRS3614303	618	596	252	240	227	224	223	222	78	76	79	68	67	72	71	73	70	70	69	69	68	67	70	69	68	69	65	65	0	37	36	37	32	34	35	31	33	31	34	31	32	34	32	31	31	29	31	27	47
SRS2420927	616	594	252	240	225	222	221	219	72	72	79	68	63	70	71	68	66	66	65	64	65	64	67	65	66	65	63	62	37	0	33	32	30	31	30	27	28	27	28	27	27	31	30	18	17	14	27	23	44
SRS2845130	613	592	249	237	224	221	220	219	70	71	76	66	62	67	68	67	65	65	63	62	63	61	65	64	64	64	59	60	36	33	0	31	28	28	28	26	25	25	29	27	27	30	27	27	27	24	25	22	41
SRS2761182	616	593	249	237	223	219	219	216	70	71	77	66	61	68	69	65	65	65	64	62	62	62	65	63	64	63	60	60	37	32	31	0	29	28	27	28	26	25	29	28	27	30	14	28	28	23	25	21	41
SRS2525483	612	589	248	236	223	220	219	217	68	69	75	64	60	65	67	66	63	63	62	62	61	60	63	62	62	61	57	58	32	30	28	29	0	26	27	25	23	23	26	23	25	27	26	23	23	22	25	19	40
SRS3932840	610	588	247	234	220	215	214	214	70	68	71	62	59	64	64	65	62	62	61	61	59	59	62	61	59	60	57	56	34	31	28	28	26	0	26	24	23	23	26	25	26	27	23	25	24	22	21	19	39
SRS3218596	608	585	246	235	216	212	211	210	67	66	73	64	59	66	67	64	62	62	61	59	61	60	63	60	62	61	59	58	35	30	28	27	27	26	0	23	22	22	24	24	24	26	24	26	24	22	21	18	34
SRS2998915	608	586	244	233	218	214	212	212	67	66	70	61	58	63	64	62	60	61	60	59	60	58	61	59	59	59	56	55	31	27	26	28	25	24	23	0	22	21	23	21	22	24	21	23	20	19	19	18	39
SRS3876540	603	581	241	230	220	216	215	214	63	65	72	63	58	63	66	61	60	60	58	58	58	58	61	58	60	58	56	56	33	28	25	26	23	23	22	22	0	19	24	21	23	25	24	23	21	18	19	15	36
SRS2547417	609	586	244	232	218	215	214	212	64	65	71	60	56	62	63	61	59	60	59	57	57	56	59	58	58	58	54	54	31	27	25	25	23	23	22	21	19	0	24	22	22	25	21	22	22	19	20	16	36
SRS3570561	610	586	246	234	217	213	212	211	69	66	75	65	60	66	68	64	63	63	62	61	61	61	64	61	62	62	60	59	34	28	29	29	26	26	24	23	24	24	0	6	13	25	26	25	22	19	22	19	36
SRS2938629	607	585	243	231	216	213	211	211	68	67	70	59	58	63	62	63	61	61	60	59	59	58	61	60	59	60	56	56	31	27	27	28	23	25	24	21	21	22	6	0	10	24	23	22	21	19	21	18	38
SRS3892739	612	590	246	235	220	217	215	214	66	67	74	63	58	65	66	63	61	61	60	59	60	59	62	60	61	60	58	57	32	27	27	27	25	26	24	22	23	22	13	10	0	27	25	23	22	19	22	18	39
SRS3703451	609	586	244	231	213	210	209	207	70	66	71	60	61	63	63	66	64	64	63	62	62	61	64	62	59	61	59	57	34	31	30	30	27	27	26	24	25	25	25	24	27	0	22	27	24	22	21	20	37
SRS2998873	610	588	243	231	213	209	207	207	69	65	67	58	58	62	61	63	60	61	60	60	59	57	60	59	58	59	55	54	32	30	27	14	26	23	24	21	24	21	26	23	25	22	0	24	22	22	20	18	34
SRS3703452	613	591	248	236	221	218	217	216	70	67	73	62	58	64	65	64	61	61	60	60	59	58	61	60	60	60	56	56	31	18	27	28	23	25	26	23	23	22	25	22	23	27	24	0	10	10	23	18	37
SRS3871671	604	582	243	230	216	210	210	211	69	67	69	59	58	64	62	63	61	61	60	59	59	59	61	60	59	59	57	56	31	17	27	28	23	24	24	20	21	22	22	21	22	24	22	10	0	7	19	18	39
SRS3877810	603	582	240	229	215	211	211	208	64	63	70	60	55	61	63	58	58	58	56	56	55	56	58	56	58	56	55	53	29	14	24	23	22	22	22	19	18	19	19	19	19	22	22	10	7	0	17	15	35
SRS3703470	603	581	240	228	214	209	208	208	65	64	66	57	56	61	59	59	59	59	58	57	56	56	60	58	56	56	55	53	31	27	25	25	25	21	21	19	19	20	22	21	22	21	20	23	19	17	0	16	37
SRS2628565	603	580	241	228	214	211	210	208	60	61	67	56	52	58	59	57	55	56	55	53	53	52	55	54	54	54	50	50	27	23	22	21	19	19	18	18	15	16	19	18	18	20	18	18	18	15	16	0	32
SRS3453937	614	587	246	235	217	214	213	211	72	66	77	66	62	68	69	67	65	65	64	64	62	62	65	64	64	64	61	60	47	44	41	41	40	39	34	39	36	36	36	38	39	37	34	37	39	35	37	32	0
SRS3471904	613	586	246	234	216	213	212	210	71	66	77	66	62	68	69	67	65	65	64	63	63	62	65	64	64	64	60	60	47	43	41	41	39	39	33	37	35	36	35	38	38	37	33	37	37	35	36	32	0
SRS3742747	612	585	245	234	216	213	212	210	71	66	77	66	62	68	69	68	65	65	64	64	63	62	65	64	64	64	61	60	47	44	41	41	40	39	34	39	37	36	35	38	39	36	34	37	38	36	37	32	6
SRS2938622	610	586	246	234	217	214	213	212	70	66	74	64	60	65	66	66	63	63	61	61	61	59	63	62	62	62	57	58	44	42	38	39	36	36	34	36	33	33	35	35	36	36	34	34	35	33	34	30	5
SRS3007170	610	582	245	232	215	212	211	209	69	65	77	66	61	68	69	66	64	65	64	62	63	62	65	63	64	63	60	60	47	42	41	40	39	39	32	37	34	35	33	37	37	35	34	37	37	34	35	31	10
SRS2938662	602	582	241	230	215	212	211	210	66	62	65	54	58	58	57	61	59	59	58	58	57	55	59	58	54	55	54	51	38	40	35	36	34	32	33	31	31	30	34	29	33	29	28	32	30	30	27	26	28
[truncated: 7 more columns]

## Sheet: F
	SRS2850296	SRS2628553	SRS2783476	SRS2998869	SRS2895509	SRS3453943	SRS3384774	SRS2998847	SRS3708648	SRS2547237	SRS3643394	SRS3471848	SRS3531728	SRS3871678	SRS3080280	SRS3080274	SRS3721753	SRS2761294	SRS3614304	SRS3007164	SRS2660215	SRS3932748	SRS3531727	SRS2609391	SRS3855333	SRS2922972	SRS3742753	SRS3643366	SRS3614303	SRS2420927	SRS2761182	SRS2845130	SRS2547417	SRS2525483	SRS2998915	SRS3932840	SRS3892739	SRS2938629	SRS3570561	SRS3703452	SRS3871671	SRS3877810	SRS3218596	SRS3703451	SRS2998873	SRS3703470	SRS3876540	SRS2628565	SRS2938662
SRS2850296	0	104	624	610	598	594	594	592	625	618	627	620	617	622	618	617	620	620	620	618	618	618	617	617	616	616	614	614	631	630	625	624	623	623	621	622	622	622	619	622	620	615	618	620	619	618	618	616	611
SRS2628553	104	0	600	586	571	567	567	565	589	581	590	583	580	584	582	581	583	583	583	581	581	581	580	580	579	579	577	577	594	592	588	587	586	586	584	585	585	585	583	585	583	579	583	584	583	581	581	579	581
SRS2783476	624	600	0	21	233	229	229	226	251	241	252	244	242	247	244	243	245	244	245	243	243	243	242	242	241	241	239	239	256	254	250	249	247	248	246	247	247	247	246	247	245	241	246	246	245	243	243	241	242
SRS2998869	610	586	21	0	220	216	216	213	238	228	239	231	229	234	231	230	232	231	232	230	230	230	229	229	228	228	226	226	243	241	237	236	235	235	233	234	234	234	233	234	232	228	233	233	232	230	230	228	229
SRS2895509	598	571	233	220	0	10	10	8	220	212	221	213	211	215	213	212	214	213	214	212	212	212	211	211	210	210	208	208	225	223	219	218	217	217	215	216	216	216	215	216	214	210	214	215	213	212	212	210	212
SRS3453943	594	567	229	216	10	0	0	4	216	208	217	209	207	211	209	208	210	209	210	208	208	208	207	207	206	206	204	204	221	219	215	214	213	213	211	212	212	212	211	212	210	206	210	211	209	208	208	206	208
SRS3384774	594	567	229	216	10	0	0	4	215	207	216	208	207	210	208	207	209	208	209	208	207	207	206	206	205	205	203	203	220	218	214	213	212	212	210	211	210	210	210	211	209	206	209	210	208	207	207	205	207
SRS2998847	592	565	226	213	8	4	4	0	213	205	214	206	204	208	206	205	207	206	207	205	205	205	204	204	203	203	201	201	218	224	212	211	210	210	208	209	209	209	208	209	207	203	208	209	207	208	205	203	206
SRS3708648	625	589	251	238	220	216	215	213	0	64	73	64	64	68	65	64	66	65	66	65	64	64	63	63	62	62	60	60	77	75	71	70	70	69	67	68	68	68	68	68	67	64	67	67	66	64	64	62	63
SRS2547237	618	581	241	228	212	208	207	205	64	0	65	56	56	60	62	61	58	57	58	57	56	56	55	55	54	54	52	52	70	70	64	63	63	62	60	61	61	61	60	61	60	57	59	59	58	57	57	55	56
SRS3643394	627	590	252	239	221	217	216	214	73	65	0	35	31	35	37	36	33	32	33	32	31	31	30	30	29	29	27	27	79	77	73	72	71	71	69	70	70	70	69	70	69	66	68	68	67	66	66	64	65
SRS3471848	620	583	244	231	213	209	208	206	64	56	35	0	26	30	32	31	28	27	28	27	26	26	25	25	24	24	22	22	70	69	64	63	63	62	60	61	61	61	60	61	60	57	59	59	58	57	57	55	58
SRS3531728	617	580	242	229	211	207	207	204	64	56	31	26	0	26	28	27	24	23	24	23	22	22	21	21	20	20	18	18	70	68	64	63	62	62	60	61	61	61	60	61	60	57	59	59	58	57	57	55	56
SRS3871678	622	584	247	234	215	211	210	208	68	60	35	30	26	0	22	21	18	17	18	17	16	16	15	15	14	14	12	12	74	72	68	67	67	66	64	65	65	65	64	65	64	61	63	63	62	61	61	59	60
SRS3080280	618	582	244	231	213	209	208	206	65	62	37	32	28	22	0	1	20	19	20	19	18	18	17	15	16	16	14	14	75	73	69	68	68	67	65	66	66	66	61	66	65	62	61	60	59	62	62	60	57
SRS3080274	617	581	243	230	212	208	207	205	64	61	36	31	27	21	1	0	19	18	19	18	17	17	16	14	15	15	13	13	74	72	68	67	67	66	64	65	65	65	60	65	64	61	60	59	58	61	61	59	56
SRS3721753	620	583	245	232	214	210	209	207	66	58	33	28	24	18	20	19	0	11	12	11	10	10	9	13	12	12	10	10	72	70	66	65	65	64	62	63	63	63	62	63	62	59	61	61	60	59	59	57	58
SRS2761294	620	583	244	231	213	209	208	206	65	57	32	27	23	17	19	18	11	0	11	10	9	9	8	12	11	11	9	9	71	71	65	64	64	63	61	62	62	62	61	62	61	58	60	60	59	58	58	56	57
SRS3614304	620	583	245	232	214	210	209	207	66	58	33	28	24	18	20	19	12	11	0	3	2	6	5	13	12	12	10	10	72	70	66	65	65	64	62	63	63	63	62	63	62	59	61	61	60	59	59	57	58
SRS3007164	618	581	243	230	212	208	208	205	65	57	32	27	23	17	19	18	11	10	3	0	1	5	4	12	11	11	9	9	71	69	65	64	64	63	61	62	62	62	61	62	61	58	60	60	59	58	58	56	57
SRS2660215	618	581	243	230	212	208	207	205	64	56	31	26	22	16	18	17	10	9	2	1	0	4	3	11	10	10	8	8	70	68	64	63	63	62	60	61	61	61	60	61	60	57	59	59	58	57	57	55	56
SRS3932748	618	581	243	230	212	208	207	205	64	56	31	26	22	16	18	17	10	9	6	5	4	0	3	11	10	10	8	8	70	68	64	63	63	62	60	61	61	61	60	61	60	57	59	59	58	57	57	55	56
SRS3531727	617	580	242	229	211	207	206	204	63	55	30	25	21	15	17	16	9	8	5	4	3	3	0	10	9	9	7	7	69	67	63	62	62	61	59	60	60	60	59	60	59	56	58	58	57	56	56	54	55
SRS2609391	617	580	242	229	211	207	206	204	63	55	30	25	21	15	15	14	13	12	13	12	11	11	10	0	9	9	7	7	69	67	63	62	62	61	59	60	60	60	59	60	59	56	58	58	57	56	56	54	55
SRS3855333	616	579	241	228	210	206	205	203	62	54	29	24	20	14	16	15	12	11	12	11	10	10	9	9	0	8	6	6	68	66	62	61	61	60	58	59	59	59	58	59	58	55	57	57	56	55	55	53	54
SRS2922972	616	579	241	228	210	206	205	203	62	54	29	24	20	14	16	15	12	11	12	11	10	10	9	9	8	0	4	4	68	66	62	61	61	60	58	59	59	59	58	59	58	55	57	57	56	55	55	53	55
SRS3742753	614	577	239	226	208	204	203	201	60	52	27	22	18	12	14	13	10	9	10	9	8	8	7	7	6	4	0	2	66	64	60	59	59	58	56	57	57	57	56	57	56	53	55	55	54	53	53	51	52
SRS3643366	614	577	239	226	208	204	203	201	60	52	27	22	18	12	14	13	10	9	10	9	8	8	7	7	6	4	2	0	66	64	60	59	59	58	56	57	57	57	56	57	56	53	55	55	54	53	53	51	52
SRS3614303	631	594	256	243	225	221	220	218	77	70	79	70	70	74	75	74	72	71	72	71	70	70	69	69	68	68	66	66	0	38	36	35	35	32	30	33	31	31	31	31	30	27	32	32	31	29	29	27	38
SRS2420927	630	592	254	241	223	219	218	224	75	70	77	69	68	72	73	72	70	71	70	69	68	68	67	67	66	66	64	64	38	0	34	33	33	30	28	31	29	29	29	19	18	15	37	30	29	32	27	25	37
SRS2761182	625	588	250	237	219	215	214	212	71	64	73	64	64	68	69	68	66	65	66	65	64	64	63	63	62	62	60	60	36	34	0	29	29	28	26	27	27	27	27	27	26	23	26	26	11	23	23	21	32
SRS2845130	624	587	249	236	218	214	213	211	70	63	72	63	63	67	68	67	65	64	65	64	63	63	62	62	61	61	59	59	35	33	29	0	28	27	25	26	26	26	26	26	25	22	25	25	24	22	22	20	31
SRS2547417	623	586	247	235	217	213	212	210	70	63	71	63	62	67	68	67	65	64	65	64	63	63	62	62	61	61	59	59	35	33	29	28	0	27	25	26	26	26	26	26	25	22	25	25	24	22	22	20	30
SRS2525483	623	586	248	235	217	213	212	210	69	62	71	62	62	66	67	66	64	63	64	63	62	62	61	61	60	60	58	58	32	30	28	27	27	0	22	25	23	23	23	23	22	19	24	24	23	21	21	19	30
SRS2998915	621	584	246	233	215	211	210	208	67	60	69	60	60	64	65	64	62	61	62	61	60	60	59	59	58	58	56	56	30	28	26	25	25	22	0	23	21	21	21	21	20	17	22	22	21	19	19	17	28
SRS3932840	622	585	247	234	216	212	211	209	68	61	70	61	61	65	66	65	63	62	63	62	61	61	60	60	59	59	57	57	33	31	27	26	26	25	23	0	24	24	24	24	23	20	23	23	22	20	20	18	29
SRS3892739	622	585	247	234	216	212	210	209	68	61	70	61	61	65	66	65	63	62	63	62	61	61	60	60	59	59	57	57	31	29	27	26	26	23	21	24	0	10	11	22	21	18	23	23	22	20	20	18	29
SRS2938629	622	585	247	234	216	212	210	209	68	61	70	61	61	65	66	65	63	62	63	62	61	61	60	60	59	59	57	57	31	29	27	26	26	23	21	24	10	0	5	22	21	18	23	23	22	20	20	18	29
SRS3570561	619	583	246	233	215	211	210	208	68	60	69	60	60	64	61	60	62	61	62	61	60	60	59	59	58	58	56	56	31	29	27	26	26	23	21	24	11	5	0	22	21	18	23	22	22	20	20	18	29
SRS3703452	622	585	247	234	216	212	211	209	68	61	70	61	61	65	66	65	63	62	63	62	61	61	60	60	59	59	57	57	31	19	27	26	26	23	21	24	22	22	22	0	9	8	23	23	22	20	20	18	29
SRS3871671	620	583	245	232	214	210	209	207	67	60	69	60	60	64	65	64	62	61	62	61	60	60	59	59	58	58	56	56	30	18	26	25	25	22	20	23	21	21	21	9	0	7	22	22	21	19	19	17	28
SRS3877810	615	579	241	228	210	206	206	203	64	57	66	57	57	61	62	61	59	58	59	58	57	57	56	56	55	55	53	53	27	15	23	22	22	19	17	20	18	18	18	8	7	0	19	18	18	16	16	14	25
SRS3218596	618	583	246	233	214	210	209	208	67	59	68	59	59	63	61	60	61	60	61	60	59	59	58	58	57	57	55	55	32	37	26	25	25	24	22	23	23	23	23	23	22	19	0	23	22	22	19	17	29
SRS3703451	620	584	246	233	215	211	210	209	67	59	68	59	59	63	60	59	61	60	61	60	59	59	58	58	57	57	55	55	32	30	26	25	25	24	22	23	23	23	22	23	22	18	23	0	20	19	19	17	28
SRS2998873	619	583	245	232	213	209	208	207	66	58	67	58	58	62	59	58	60	59	60	59	58	58	57	57	56	56	54	54	31	29	11	24	24	23	21	22	22	22	22	22	21	18	22	20	0	18	18	16	27
SRS3703470	618	581	243	230	212	208	207	208	64	57	66	57	57	61	62	61	59	58	59	58	57	57	56	56	55	55	53	53	29	32	23	22	22	21	19	20	20	20	20	20	19	16	22	19	18	0	16	14	25
SRS3876540	618	581	243	230	212	208	207	205	64	57	66	57	57	61	62	61	59	58	59	58	57	57	56	56	55	55	53	53	29	27	23	22	22	21	19	20	20	20	20	20	19	16	19	19	18	16	0	14	25
SRS2628565	616	579	241	228	210	206	205	203	62	55	64	55	55	59	60	59	57	56	57	56	55	55	54	54	53	53	51	51	27	25	21	20	20	19	17	18	18	18	18	18	17	14	17	17	16	14	14	0	23
SRS2938662	611	581	242	229	212	208	207	206	63	56	65	58	56	60	57	56	58	57	58	57	56	56	55	55	54	55	52	52	38	37	32	31	30	30	28	29	29	29	29	29	28	25	29	28	27	25	25	23	0
SRS3007170	621	585	246	233	214	210	209	207	68	64	73	64	64	68	67	66	66	65	66	65	64	64	63	63	62	62	60	60	47	45	41	40	40	39	37	38	38	38	33	37	37	34	33	33	31	34	34	32	21
SRS3471904	621	585	246	233	214	210	209	207	68	64	73	64	64	68	67	66	66	65	66	65	64	64	63	63	62	62	60	60	47	45	41	40	40	39	37	38	38	38	33	37	37	34	33	33	31	34	34	32	21
SRS3453937	621	585	246	233	214	210	209	207	68	64	73	64	64	68	67	66	66	65	66	65	64	64	63	63	62	62	60	60	47	45	41	40	40	39	37	38	38	38	33	37	37	34	33	33	31	34	34	32	21
SRS2938622	621	585	246	233	214	210	209	207	67	63	72	64	63	67	66	65	65	64	65	64	63	63	62	62	61	62	59	59	46	45	40	39	39	38	36	37	37	37	32	36	36	33	32	32	30	33	33	31	20
SRS3742747	620	584	245	232	213	209	208	206	68	64	73	65	64	68	67	66	66	65	66	65	64	64	63	63	62	62	60	60	47	45	41	40	40	39	37	38	38	38	33	37	37	34	33	33	31	34	34	32	21
[truncated: 7 more columns]

[truncated: 4 more sheets: G, H, I, J]
