# Supplementary material for: Genomic characterization and phylogenetic analysis of Salmonella enterica serovar Javiana
Source: PeerJ. 2020 Nov 20;8:e10256. doi: 10.7717/peerj.10256 (PMC7682435; doi:10.7717/peerj.10256)
Supplement: Data S5 [file peerj-08-10256-s009.xlsx]

## Sheet: phaster
Data S5. Phaster Results
Prophage regions present in various isolates, as determined by Phaster.
Isolate	Clade	Description	Region	Length (Kb)	Completeness (Score)	Specific Keyword(s)	Location (contig)	Location (nt position)	No. tRNAs	No. Total Proteins	No. Phage Hit Proteins	No. Hypothetical Proteins	No. Bacterial Proteins	Att. Site	No. Phage Species Hits	Most Common Phage Name (No. Gene Hits)	GC Content
GCF_000341425.1		reference (external)	1	33.6	questionable(90)	integrase,lysin,tail,terminase	NC_020307.1	368287-401941	0	16	11	5	0	yes	7	PHAGE_Salmon_Fels_1_NC_010391(5)	0.4935
GCF_000341425.1		reference (external)	2	6.1	incomplete(40)	transposase,tail,lysin	NC_020307.1	1031412-1037589	0	9	7	2	0	no	7	PHAGE_Entero_cdtI_NC_009514(2)	0.4178
GCF_000341425.1		reference (external)	3	37	incomplete(50)	terminase,tail,lysin	NC_020307.1	1206020-1243114	1	35	29	6	0	yes	18	PHAGE_Pectob_ZF40_NC_019522(11)	0.4922
GCF_000341425.1		reference (external)	4	7	incomplete(20)	tail	NC_020307.1	1677530-1684614	1	10	6	4	0	no	5	PHAGE_Shigel_SfIV_NC_022749(2)	0.4135
GCF_000341425.1		reference (external)	5	7.4	incomplete(20)	integrase	NC_020307.1	1890622-1898066	0	10	6	4	0	yes	3	PHAGE_Salmon_Fels_2_NC_010463(3) PHAGE_Salmon_SJ46_NC_031129(3)	0.4696
GCF_000341425.1		reference (external)	6	52.2	intact(150)	integrase,capsid,terminase,head,tail,lysis,plate	NC_020307.1	4077536-4129791	0	51	42	9	0	yes	6	PHAGE_Salmon_RE_2010_NC_019488(36)	0.5115
GCF_000341425.1		reference (external)	7	44.3	intact(150)	tail,plate,terminase,capsid,portal,integrase	NC_020307.1	4148017-4192412	0	47	45	2	0	yes	5	PHAGE_Entero_PsP3_NC_005340(38)	0.521
GCF_000341425.1		reference (external)	8	30.6	questionable(90)	integrase,terminase,portal,protease,tail	NC_020307.1	4219725-4250331	0	36	31	5	0	yes	10	PHAGE_Salmon_SEN34_NC_028699(18)	0.49
SRS2420927	1	reference (internal)	1	58	intact(150)	integrase,lysis,terminase,head,capsid,tail,plate	1	251335-309374	5	68	62	6	0	yes	11	PHAGE_Salmon_118970_sal3_NC_031940(63)	0.5055
SRS2420927	1	reference (internal)	2	33.6	questionable(90)	integrase,lysin,tail,terminase	1	402142-435796	0	16	11	5	0	yes	7	PHAGE_Salmon_Fels_1_NC_010391(5)	0.4934
SRS2420927	1	reference (internal)	3	6.1	incomplete(40)	transposase,tail,lysin	1	1065336-1071513	0	10	7	3	0	no	7	PHAGE_Entero_cdtI_NC_009514(2)	0.4179
SRS2420927	1	reference (internal)	4	47.6	intact(150)	tail,plate,lysin,lysis,terminase,capsid,portal,integrase	2	37394-84998	0	43	40	3	0	yes	5	PHAGE_Salmon_Fels_2_NC_010463(35)	0.4938
SRS2420927	1	reference (internal)	5	7.4	incomplete(20)	integrase	3	32168-39620	0	10	6	4	0	yes	3	PHAGE_Salmon_Fels_2_NC_010463(3) PHAGE_Salmon_SJ46_NC_031129(3)	0.4693
SRS2420927	1	reference (internal)	6	7	incomplete(20)	tail	3	245642-252726	1	11	6	5	0	no	5	PHAGE_Shigel_SfIV_NC_022749(2)	0.4135
SRS2420927	1	reference (internal)	7	33.7	intact(150)	integrase,lysin,terminase,portal,protease,tail	3	656306-690077	0	44	40	4	0	yes	10	PHAGE_Phage_Gifsy_2_NC_010393(28)	0.5314
SRS2420927	1	reference (internal)	8	9.9	questionable(75)	integrase,head	4	294656-304642	0	11	10	1	0	yes	3	PHAGE_Entero_P4_NC_001609(7)	0.4919
SRS2420927	1	reference (internal)	9	30.1	incomplete(30)	integrase	7	180487-210647	0	24	13	11	0	yes	11	PHAGE_Entero_mEp237_NC_019704(3)	0.4944
SRS2420927	1	reference (internal)	10	22.4	intact(150)	lysin,lysis,terminase,portal,head,capsid,transposase,tail	7	204647-227078	0	30	29	1	0	no	8	PHAGE_Phage_Gifsy_1_NC_010392(22)	0.5229
SRS2420927	1	reference (internal)	11	17.7	incomplete(20)	integrase	12	981-18691	0	24	19	5	0	yes	7	PHAGE_Salmon_SEN34_NC_028699(13)	0.4959
SRS2822480	2	reference (internal)	1	31.5	questionable(80)	integrase,lysin,tail,terminase	1	362158-393712	0	15	10	5	0	yes	7	PHAGE_Salmon_Fels_1_NC_010391(4)	0.4978
SRS2822480	2	reference (internal)	2	6.1	incomplete(40)	transposase,tail,lysin	1	1023289-1029466	0	9	7	2	0	no	7	PHAGE_Entero_cdtI_NC_009514(2)	0.4178
SRS2822480	2	reference (internal)	3	25.1	incomplete(40)	terminase,tail,lysin	2	67937-93093	0	33	27	6	0	no	16	PHAGE_Pectob_ZF40_NC_019522(11)	0.4801
SRS2822480	2	reference (internal)	4	40.9	intact(150)	tail,plate,head,portal,terminase,lysin,integrase	2	124929-165837	0	57	52	5	0	yes	13	PHAGE_Salmon_118970_sal3_NC_031940(31)	0.5042
SRS2822480	2	reference (internal)	5	7	incomplete(20)	tail	2	570505-577589	1	10	6	4	0	no	5	PHAGE_Shigel_SfIV_NC_022749(2)	0.4135
SRS2822480	2	reference (internal)	6	47.1	incomplete(60)	integrase,tail,head	2	783600-830767	0	69	60	9	0	yes	21	PHAGE_Entero_UAB_Phi20_NC_031019(27)	0.4749
SRS2822480	2	reference (internal)	7	34.3	intact(140)	integrase,portal,terminase,capsid,plate,tail	4	9925-44280	0	48	46	2	0	yes	5	PHAGE_Entero_PsP3_NC_005340(39)	0.5204
SRS2822480	2	reference (internal)	8	25.7	questionable(80)	tail,protease,portal,terminase,integrase	10	82310-108066	0	37	31	6	0	yes	10	PHAGE_Salmon_SEN34_NC_028699(18)	0.5128
SRS3010019	3	reference (internal)	1	33.6	questionable(90)	integrase,lysin,tail,terminase	1	362664-396318	0	17	11	6	0	yes	7	PHAGE_Salmon_Fels_1_NC_010391(5)	0.4936
SRS3010019	3	reference (internal)	2	6.1	incomplete(40)	transposase,tail,lysin	1	1066889-1073066	0	9	7	2	0	no	7	PHAGE_Entero_cdtI_NC_009514(2)	0.4179
SRS3010019	3	reference (internal)	3	42.6	intact(150)	transposase,tail,protease,portal,terminase,head,integrase	1	1078480-1121143	0	47	40	7	0	yes	10	PHAGE_Salmon_118970_sal3_NC_031940(23)	0.5214
SRS3010019	3	reference (internal)	4	7	incomplete(20)	tail	1	1712719-1719803	1	10	6	4	0	no	5	PHAGE_Shigel_SfIV_NC_022749(2)	0.4135
SRS3010019	3	reference (internal)	5	7.4	incomplete(20)	integrase	1	1925814-1933258	0	10	6	4	0	yes	3	PHAGE_Salmon_Fels_2_NC_010463(3) PHAGE_Salmon_SJ46_NC_031129(3)	0.4696
SRS3010019	3	reference (internal)	6	34.9	intact(150)	tail,plate,lysin,lysis,terminase,capsid,portal,integrase,recombinase	2	42664-77584	0	47	42	5	0	yes	9	PHAGE_Salmon_Fels_2_NC_010463(33)	0.5179
SRS3010019	3	reference (internal)	7	24.1	intact(150)	tail,plate,lysis,head,terminase,capsid,portal	3	237996-262143	0	28	26	2	0	no	9	PHAGE_Entero_P88_NC_026014(18)	0.5388
SRS3010019	3	reference (internal)	8	16.5	incomplete(20)	integrase	9	546-17079	0	12	11	1	0	yes	6	PHAGE_Salmon_SEN34_NC_028699(7)	0.5165
SRS3010019	3	reference (internal)	9	15	incomplete(20)	integrase	12	150-15215	0	17	13	4	0	yes	6	PHAGE_Salmon_SEN34_NC_028699(8)	0.5038
SRS2628565	1		1	15	incomplete(40)	integrase,tail,transposase	1	103684-118741	0	21	14	7	0	yes	10	PHAGE_Salmon_118970_sal3_NC_031940(9)	0.4956
SRS2628565	1		2	6.1	incomplete(40)	lysin,tail,transposase	1	122992-129169	0	10	7	3	0	no	7	PHAGE_Entero_cdtI_NC_009514(2)	0.4179
SRS2628565	1		3	33.6	questionable(90)	tail,terminase,lysin,integrase	1	758722-792376	0	16	11	5	0	yes	7	PHAGE_Salmon_Fels_1_NC_010391(5)	0.4934
SRS2628565	1		4	7.4	incomplete(20)	integrase	2	34428-41880	0	10	6	4	0	yes	3	PHAGE_Salmon_Fels_2_NC_010463(3) PHAGE_Salmon_SJ46_NC_031129(3)	0.4693
SRS2628565	1		5	9.8	incomplete(20)	tail	2	247902-257764	1	14	7	7	0	no	6	PHAGE_Shigel_SfIV_NC_022749(2)	0.443
SRS2628565	1		6	51.6	intact(150)	integrase,lysin,terminase,portal,protease,tail	2	648939-700560	0	48	42	6	0	yes	14	PHAGE_Phage_Gifsy_1_NC_010392(23) PHAGE_Phage_Gifsy_2_NC_010393(23)	0.5277
SRS2628565	1		7	9.9	questionable(75)	integrase,head	3	259121-269107	0	11	10	1	0	yes	3	PHAGE_Entero_P4_NC_001609(7)	0.4919
SRS2628565	1		8	47.6	intact(150)	tail,plate,lysin,lysis,terminase,capsid,portal,integrase	9	37394-84998	0	44	40	4	0	yes	5	PHAGE_Salmon_Fels_2_NC_010463(35)	0.4938
SRS2628565	1		9	27.7	incomplete(30)	integrase,tail	14	4362-32115	0	25	20	5	0	yes	7	PHAGE_Salmon_SEN34_NC_028699(13)	0.5101
SRS3643364	3		1	7.4	incomplete(20)	integrase	1	1529-8973	0	10	6	4	0	yes	3	PHAGE_Salmon_Fels_2_NC_010463(3) PHAGE_Salmon_SJ46_NC_031129(3)	0.4696
SRS3643364	3		2	9.8	incomplete(20)	tail	1	214995-224857	1	14	7	7	0	no	6	PHAGE_Shigel_SfIV_NC_022749(2)	0.443
SRS3643364	3		3	40	intact(150)	integrase,tail,terminase,portal,protease	1	812614-852675	0	44	39	5	0	yes	9	PHAGE_Salmon_118970_sal3_NC_031940(23)	0.5262
SRS3643364	3		4	12.9	incomplete(40)	terminase,tail,lysin	4	399258-412204	0	16	13	3	0	no	9	PHAGE_Phage_Gifsy_1_NC_010392(5)	0.5075
SRS3643364	3		5	49.8	intact(150)	lysin,terminase,portal,head,capsid,tail,plate,integrase	8	206533-256344	0	48	40	8	0	yes	19	PHAGE_Edward_GF_2_NC_026611(16)	0.5068
SRS3643364	3		6	16.5	incomplete(20)	integrase	14	22651-39184	0	12	11	1	0	yes	6	PHAGE_Salmon_SEN34_NC_028699(7)	0.5163
SRS3643364	3		7	15	incomplete(20)	integrase	16	12067-27144	0	17	13	4	0	yes	6	PHAGE_Salmon_SEN34_NC_028699(8)	0.5038
SRS3721796	3		1	6.1	incomplete(40)	transposase,tail,lysin	2	638250-644427	0	10	7	3	0	no	7	PHAGE_Entero_cdtI_NC_009514(2)	0.4179
SRS3721796	3		2	35.3	intact(150)	integrase,tail,terminase,portal,protease	3	434021-469355	0	39	34	5	0	yes	8	PHAGE_Salmon_118970_sal3_NC_031940(23)	0.5223
SRS3721796	3		3	9.8	incomplete(20)	tail	7	153730-163592	1	13	7	6	0	no	6	PHAGE_Shigel_SfIV_NC_022749(2)	0.443
SRS3721796	3		4	7.4	incomplete(20)	integrase	7	369603-377047	0	10	6	4	0	yes	3	PHAGE_Salmon_Fels_2_NC_010463(3) PHAGE_Salmon_SJ46_NC_031129(3)	0.4696
SRS3721796	3		5	49.8	intact(150)	lysin,terminase,portal,head,capsid,tail,plate,integrase	9	205692-255503	0	48	40	8	0	yes	19	PHAGE_Edward_GF_2_NC_026611(16)	0.5068
SRS3721796	3		6	34.8	intact(150)	recombinase,integrase,portal,terminase,capsid,tail,lysis,lysin,plate	13	1235-36110	0	47	42	5	0	yes	9	PHAGE_Salmon_Fels_2_NC_010463(33)	0.5179
SRS3721796	3		7	16.5	incomplete(20)	integrase	15	22651-39184	0	12	11	1	0	yes	6	PHAGE_Salmon_SEN34_NC_028699(7)	0.5163
SRS3721796	3		8	15	incomplete(20)	integrase	18	12067-27144	0	17	13	4	0	yes	6	PHAGE_Salmon_SEN34_NC_028699(8)	0.5038
SRS3799118	3		1	7.4	incomplete(20)	integrase	1	1529-8973	0	10	6	4	0	yes	3	PHAGE_Salmon_Fels_2_NC_010463(3) PHAGE_Salmon_SJ46_NC_031129(3)	0.4696
SRS3799118	3		2	9.8	incomplete(20)	tail	1	214995-224857	1	14	7	7	0	no	6	PHAGE_Shigel_SfIV_NC_022749(2)	0.443
SRS3799118	3		3	40	intact(150)	integrase,tail,terminase,portal,protease	1	812614-852675	0	44	39	5	0	yes	9	PHAGE_Salmon_118970_sal3_NC_031940(23)	0.5262
SRS3799118	3		4	12.9	incomplete(40)	terminase,tail,lysin	4	399258-412204	0	16	13	3	0	no	9	PHAGE_Phage_Gifsy_1_NC_010392(5)	0.5075
SRS3799118	3		5	49.8	intact(150)	lysin,terminase,portal,head,capsid,tail,plate,integrase	8	206533-256344	0	48	40	8	0	yes	19	PHAGE_Edward_GF_2_NC_026611(16)	0.5068
SRS3799118	3		6	16.5	incomplete(20)	integrase	14	22651-39184	0	12	11	1	0	yes	6	PHAGE_Salmon_SEN34_NC_028699(7)	0.5163
SRS3799118	3		7	15	incomplete(20)	integrase	16	12067-27144	0	17	13	4	0	yes	6	PHAGE_Salmon_SEN34_NC_028699(8)	0.5038
SRS3932840	1	outbreak	1	6.1	incomplete(40)	transposase,tail,lysin	1	637458-643635	0	10	7	3	0	no	7	PHAGE_Entero_cdtI_NC_009514(2)	0.4179
SRS3932840	1	outbreak	2	26.5	incomplete(40)	transposase,tail,integrase	1	636408-662943	0	19	13	6	0	yes	9	PHAGE_Salmon_118970_sal3_NC_031940(8)	0.4563
SRS3932840	1	outbreak	3	9.9	questionable(75)	integrase,head	2	381207-391193	0	11	10	1	0	yes	3	PHAGE_Entero_P4_NC_001609(7)	0.4919
SRS3932840	1	outbreak	4	7.4	incomplete(20)	integrase	3	21086-28538	0	10	6	4	0	yes	3	PHAGE_Salmon_Fels_2_NC_010463(3) PHAGE_Salmon_SJ46_NC_031129(3)	0.4693
SRS3932840	1	outbreak	5	9.8	incomplete(20)	tail	3	234560-244422	1	14	7	7	0	no	6	PHAGE_Shigel_SfIV_NC_022749(2)	0.443
SRS3932840	1	outbreak	6	51.6	intact(150)	integrase,lysin,terminase,portal,protease,tail	3	635597-687219	0	48	42	6	0	yes	14	PHAGE_Phage_Gifsy_1_NC_010392(23) PHAGE_Phage_Gifsy_2_NC_010393(23)	0.5277
SRS3932840	1	outbreak	7	44.7	intact(140)	integrase,head,portal,tail	4	309591-354380	4	56	48	8	0	yes	23	PHAGE_Entero_mEp390_NC_019721(18)	0.4789
SRS3932840	1	outbreak	8	24.9	questionable(80)	integrase,lysin,tail,terminase	4	403399-428371	0	17	11	6	0	yes	7	PHAGE_Salmon_Fels_1_NC_010391(5)	0.5169
SRS3932840	1	outbreak	9	32.9	intact(150)	tail,plate,lysin,lysis,terminase,capsid,portal,integrase	14	42603-75519	0	43	40	3	0	yes	5	PHAGE_Salmon_Fels_2_NC_010463(35)	0.5242
SRS3932840	1	outbreak	10	27.7	incomplete(30)	integrase,tail	18	4362-32115	0	25	20	5	0	yes	7	PHAGE_Salmon_SEN34_NC_028699(13)	0.5101
SRS3944395	2	outbreak	1	31.5	intact(100)	transposase,tail,terminase,lysin,integrase	1	551195-582749	0	18	12	6	0	yes	8	PHAGE_Salmon_Fels_1_NC_010391(4)	0.4978
SRS3944395	2	outbreak	2	9.8	incomplete(20)	tail	2	154756-164618	1	13	7	6	0	no	6	PHAGE_Shigel_SfIV_NC_022749(2)	0.4431
SRS3944395	2	outbreak	3	47.1	incomplete(60)	integrase,tail,head	2	370632-417799	0	69	60	9	0	yes	22	PHAGE_Entero_UAB_Phi20_NC_031019(23)	0.4749
SRS3944395	2	outbreak	4	42.5	intact(150)	integrase,lysis,lysin,terminase,portal,head,tail,plate	4	228458-270994	0	59	54	5	0	yes	13	PHAGE_Salmon_118970_sal3_NC_031940(33)	0.5046
SRS3944395	2	outbreak	5	25.1	incomplete(40)	lysin,tail,terminase	4	302599-327755	0	33	27	6	0	no	16	PHAGE_Pectob_ZF40_NC_019522(11)	0.4801
SRS3944395	2	outbreak	6	6.1	incomplete(40)	transposase,tail,lysin	8	77841-84018	0	9	7	2	0	no	7	PHAGE_Entero_cdtI_NC_009514(2)	0.4178
SRS3944395	2	outbreak	7	22.7	incomplete(30)	transposase,recombinase	18	5972-28697	0	25	9	16	0	yes	8	PHAGE_Escher_RCS47_NC_042128(5)	0.5167
SRS3944395	2	outbreak	8	25.7	questionable(80)	tail,protease,portal,terminase,integrase	24	738-26494	0	38	30	8	0	yes	10	PHAGE_Salmon_SEN34_NC_028699(17)	0.5128
SRS3975519	2	outbreak	1	4.8	incomplete(40)	plate,transposase	1	294812-299666	0	6	4	2	0	no	3	PHAGE_Salmon_SJ46_NC_031129(2)	0.5026
SRS3975519	2	outbreak	2	42.5	intact(150)	integrase,lysis,lysin,terminase,portal,head,tail,plate	2	228442-270978	0	59	54	5	0	yes	13	PHAGE_Salmon_118970_sal3_NC_031940(33)	0.5046
SRS3975519	2	outbreak	3	25.1	incomplete(40)	lysin,tail,terminase	2	302583-327739	0	33	27	6	0	no	16	PHAGE_Pectob_ZF40_NC_019522(11)	0.4801
SRS3975519	2	outbreak	4	20.9	questionable(80)	integrase,lysin,tail,terminase,transposase	12	99498-120444	0	19	11	8	0	yes	8	PHAGE_Salmon_Fels_1_NC_010391(4)	0.4918
SRS3975519	2	outbreak	5	22.7	incomplete(30)	transposase,recombinase	22	5927-28652	0	25	9	16	0	yes	8	PHAGE_Escher_RCS47_NC_042128(5)	0.5167
SRS3975519	2	outbreak	6	37.8	incomplete(50)	tail,head	28	858-38678	0	56	53	3	0	no	18	PHAGE_Entero_UAB_Phi20_NC_031019(23)	0.4835
SRS3975519	2	outbreak	7	6.3	incomplete(20)	tail	32	2328-8719	0	9	6	3	0	no	5	PHAGE_Shigel_SfIV_NC_022749(2)	0.4579
SRS3975519	2	outbreak	8	25.7	questionable(80)	tail,protease,portal,terminase,integrase	37	647-26403	0	38	30	8	0	yes	10	PHAGE_Salmon_SEN34_NC_028699(17)	0.5128
SRS3975519	2	outbreak	9	6.4	incomplete(30)	integrase,tail	49	244-6736	0	10	6	4	0	no	5	PHAGE_Bacter_APSE_2_NC_011551(2) PHAGE_Burkho_BcepC6B_NC_005887(2) PHAGE_Endosy_APSE_1_NC_000935(2) PHAGE_Xylell_Xfas53_NC_013599(2) PHAGE_Salmon_Fels_2_NC_010463(2) PHAGE_Salmon_SJ46_NC_031129(2)	0.4827
SRS2420915	3		1	33.6	questionable(90)	integrase,lysin,tail,terminase	1	362664-396318	0	16	11	5	0	yes	7	PHAGE_Salmon_Fels_1_NC_010391(5)	0.4936
SRS2420915	3		2	6.1	incomplete(40)	transposase,tail,lysin	1	1066889-1073066	0	10	7	3	0	no	7	PHAGE_Entero_cdtI_NC_009514(2)	0.4179
SRS2420915	3		3	34	intact(150)	tail,protease,portal,terminase,lysin,integrase	2	2820-36834	0	37	33	4	0	yes	7	PHAGE_Salmon_118970_sal3_NC_031940(23)	0.5205
SRS2420915	3		4	9.8	incomplete(20)	tail	2	624772-634634	1	13	7	6	0	no	6	PHAGE_Shigel_SfIV_NC_022749(2)	0.443
SRS2420915	3		5	7.4	incomplete(20)	integrase	2	840645-848089	0	10	6	4	0	yes	3	PHAGE_Salmon_Fels_2_NC_010463(3) PHAGE_Salmon_SJ46_NC_031129(3)	0.4696
SRS2420915	3		6	34.9	intact(150)	tail,plate,lysin,lysis,terminase,capsid,portal,integrase,recombinase	3	42664-77584	0	47	42	5	0	yes	9	PHAGE_Salmon_Fels_2_NC_010463(33)	0.5179
SRS2420915	3		7	24.1	intact(150)	tail,plate,lysis,head,terminase,capsid,portal	4	237669-261816	0	28	26	2	0	no	9	PHAGE_Entero_P88_NC_026014(18)	0.5388
SRS2420915	3		8	13.6	incomplete(20)	integrase	12	391-14037	0	11	10	1	0	yes	6	PHAGE_Salmon_SEN34_NC_028699(6)	0.511
SRS2442409	2		1	33.6	questionable(90)	integrase,lysin,tail,terminase	1	188888-222542	0	17	11	6	0	yes	7	PHAGE_Salmon_Fels_1_NC_010391(5)	0.4935
SRS2442409	2		2	6.1	incomplete(40)	transposase,tail,lysin	1	852003-858180	0	9	7	2	0	no	7	PHAGE_Entero_cdtI_NC_009514(2)	0.4178
SRS2442409	2		3	25.1	incomplete(40)	terminase,tail,lysin	1	1036411-1061568	0	33	27	6	0	no	16	PHAGE_Pectob_ZF40_NC_019522(11)	0.4802
SRS2442409	2		4	18.6	questionable(75)	integrase,head	2	462-19087	0	15	11	4	0	yes	5	PHAGE_Entero_P4_NC_001609(7)	0.4497
SRS2442409	2		5	30.6	questionable(90)	integrase,terminase,portal,protease,tail	3	16520-47133	0	37	31	6	0	yes	10	PHAGE_Salmon_SEN34_NC_028699(18)	0.4901
SRS2442409	2		6	7.4	incomplete(20)	integrase	5	32602-40046	0	10	6	4	0	yes	3	PHAGE_Salmon_Fels_2_NC_010463(3) PHAGE_Salmon_SJ46_NC_031129(3)	0.4696
SRS2442409	2		7	6.3	incomplete(20)	tail	9	153570-159961	0	8	6	2	0	no	5	PHAGE_Shigel_SfIV_NC_022749(2)	0.4579
SRS2442409	2		8	41.1	intact(150)	terminase,portal,head,tail,plate	14	102-41206	1	52	47	5	0	no	16	PHAGE_Salmon_118970_sal3_NC_031940(47)	0.5168
SRS2547237	1		1	6.1	incomplete(40)	transposase,tail,lysin	1	637442-643619	0	10	7	3	0	no	7	PHAGE_Entero_cdtI_NC_009514(2)	0.4179
SRS2547237	1		2	26.5	incomplete(40)	transposase,tail,integrase	1	636392-662927	0	19	13	6	0	yes	9	PHAGE_Salmon_118970_sal3_NC_031940(8)	0.4563
SRS2547237	1		3	45.2	intact(150)	tail,protease,portal,terminase,lysin,integrase	2	13-45272	0	49	43	6	0	yes	13	PHAGE_Phage_Gifsy_1_NC_010392(25) PHAGE_Phage_Gifsy_2_NC_010393(25)	0.5302
SRS2547237	1		4	9.8	incomplete(20)	tail	2	445888-455750	1	13	7	6	0	no	6	PHAGE_Shigel_SfIV_NC_022749(2)	0.443
SRS2547237	1		5	46.7	questionable(90)	integrase,lysis,injection,head,plate	2	661762-708479	0	67	60	7	0	yes	16	PHAGE_Entero_UAB_Phi20_NC_031019(33)	0.4728
SRS2547237	1		6	47.6	intact(150)	tail,plate,lysin,lysis,terminase,capsid,portal,integrase	3	37385-84989	0	43	40	3	0	yes	5	PHAGE_Salmon_Fels_2_NC_010463(35)	0.4938
SRS2547237	1		7	9.9	questionable(75)	integrase,head	4	259136-269122	0	11	10	1	0	yes	3	PHAGE_Entero_P4_NC_001609(7)	0.4919
SRS2547237	1		8	17.9	questionable(80)	tail,terminase,lysin,integrase	6	13-17958	0	16	11	5	0	yes	7	PHAGE_Salmon_Fels_1_NC_010391(5)	0.5133
SRS2547237	1		9	31.9	intact(150)	integrase,portal,terminase,capsid,head,tail,lysin,plate	8	68747-100704	0	41	39	2	0	yes	5	PHAGE_Salmon_SP_004_NC_021774(31)	0.5207
SRS2547237	1		10	18.1	incomplete(30)	tail,integrase	15	1-18176	0	26	20	6	0	yes	7	PHAGE_Salmon_SEN34_NC_028699(13)	0.4965
SRS2609378	3		1	12.9	incomplete(40)	lysin,tail,terminase	1	141-13087	0	17	14	3	0	no	9	PHAGE_Phage_Gifsy_1_NC_010392(6)	0.5075
SRS2609378	3		2	7.4	incomplete(20)	integrase	1	31186-38630	0	10	6	4	0	yes	3	PHAGE_Salmon_Fels_2_NC_010463(3) PHAGE_Salmon_SJ46_NC_031129(3)	0.4696
SRS2609378	3		3	9.8	incomplete(20)	tail	1	244652-254514	1	13	7	6	0	no	6	PHAGE_Shigel_SfIV_NC_022749(2)	0.443
SRS2609378	3		4	45.2	intact(150)	integrase,tail,terminase,portal,protease,transposase	1	843238-888465	0	53	44	9	0	yes	11	PHAGE_Salmon_118970_sal3_NC_031940(23)	0.5212
SRS2609378	3		5	6.1	incomplete(40)	lysin,tail,transposase	1	892384-898561	0	10	7	3	0	no	7	PHAGE_Entero_cdtI_NC_009514(2)	0.4179
SRS2609378	3		6	47.2	intact(150)	tail,terminase,integrase,plate,capsid,head,portal,lysin	1	1537681-1584946	0	46	39	7	0	yes	19	PHAGE_Edward_GF_2_NC_026611(16)	0.5063
SRS2609378	3		7	34.9	intact(150)	tail,plate,lysin,lysis,terminase,capsid,portal,integrase,recombinase	2	42664-77584	0	47	42	5	0	yes	9	PHAGE_Salmon_Fels_2_NC_010463(33)	0.5179
SRS2609378	3		8	16.5	incomplete(20)	integrase	9	546-17079	0	12	11	1	0	yes	6	PHAGE_Salmon_SEN34_NC_028699(7)	0.5164
SRS2609378	3		9	15	incomplete(20)	integrase	11	12067-27144	0	17	13	4	0	yes	6	PHAGE_Salmon_SEN34_NC_028699(8)	0.5038
SRS2628553	1		1	34.8	intact(150)	lysin,lysis,terminase,portal,head,capsid,transposase,tail,plate	1	12-34891	0	40	39	1	0	no	8	PHAGE_Phage_Gifsy_1_NC_010392(30)	0.5187
SRS2628553	1		2	15	incomplete(40)	integrase,tail,transposase	1	221373-236430	0	20	13	7	0	yes	9	PHAGE_Salmon_118970_sal3_NC_031940(8)	0.4957
SRS2628553	1		3	33.6	questionable(90)	tail,terminase,lysin,integrase	1	911407-945061	0	17	11	6	0	yes	7	PHAGE_Salmon_Fels_1_NC_010391(5)	0.4934
SRS2628553	1		4	34.4	intact(140)	integrase,portal,terminase,capsid,plate,tail	2	9864-44345	0	44	43	1	0	yes	7	PHAGE_Entero_PsP3_NC_005340(35)	0.5254
SRS2628553	1		5	11.6	questionable(75)	integrase,head	2	73819-85448	0	12	9	3	0	yes	3	PHAGE_Entero_P4_NC_001609(7)	0.4768
SRS2628553	1		6	7.4	incomplete(20)	integrase	3	32471-39915	0	10	6	4	0	yes	3	PHAGE_Salmon_Fels_2_NC_010463(3) PHAGE_Salmon_SJ46_NC_031129(3)	0.4696
SRS2628553	1		7	9.8	incomplete(20)	tail	3	245937-255799	1	14	7	7	0	no	6	PHAGE_Shigel_SfIV_NC_022749(2)	0.443
SRS2628553	1		8	11.2	questionable(75)	integrase,head	4	259305-270572	0	14	11	3	0	no	4	PHAGE_Entero_P4_NC_001609(7)	0.4936
SRS2628553	1		9	85.8	questionable(90)	tail,head,transposase	11	3-85841	0	101	82	19	0	no	13	PHAGE_Escher_RCS47_NC_042128(66) PHAGE_Entero_P1_NC_005856(66)	0.4938
SRS2628553	1		10	18.1	incomplete(20)	integrase	18	6728-24901	0	13	9	4	0	yes	5	PHAGE_Salmon_SEN34_NC_028699(5)	0.5213
SRS2761300	3		1	33.6	questionable(90)	tail,terminase,lysin,integrase	1	644930-678584	0	17	11	6	0	yes	7	PHAGE_Salmon_Fels_1_NC_010391(5)	0.4936
SRS2761300	3		2	31	incomplete(40)	tail,integrase	11	22-31070	0	21	19	2	0	yes	6	PHAGE_Salmon_118970_sal3_NC_031940(23)	0.4947
SRS2761300	3		3	17.4	incomplete(20)	integrase	17	22651-40055	0	13	12	1	0	yes	6	PHAGE_Salmon_SEN34_NC_028699(8)	0.5146
SRS2761300	3		4	14.5	incomplete(40)	lysin,tail,terminase	20	1-14540	0	19	15	4	0	no	10	PHAGE_Phage_Gifsy_1_NC_010392(6)	0.5017
SRS2761300	3		5	15	incomplete(20)	integrase	21	150-15215	0	17	13	4	0	yes	6	PHAGE_Salmon_SEN34_NC_028699(8)	0.5038
SRS2761300	3		6	18.4	intact(150)	terminase,portal,protease,tail	23	2-18432	0	19	18	1	0	no	2	PHAGE_Entero_mEp460_NC_019716(16)	0.5678
SRS2761300	3		7	7.4	incomplete(20)	integrase	24	139-7583	0	11	6	5	0	yes	3	PHAGE_Salmon_Fels_2_NC_010463(3) PHAGE_Salmon_SJ46_NC_031129(3)	0.4696
SRS2783476	1		1	9.9	questionable(75)	integrase,head	1	148560-158546	0	11	10	1	0	yes	3	PHAGE_Entero_P4_NC_001609(7)	0.4919
SRS2783476	1		2	45.6	intact(150)	tail,plate,lysin,lysis,terminase,capsid,portal,integrase	6	101729-147344	0	46	42	4	0	yes	7	PHAGE_Salmon_Fels_2_NC_010463(34)	0.5031
SRS2783476	1		3	35	incomplete(50)	plate,lysin,terminase	7	28862-63959	1	38	29	9	0	yes	15	PHAGE_Pectob_ZF40_NC_019522(14)	0.5083
SRS2783476	1		4	17.4	incomplete(30)	integrase,tail	7	221242-238665	0	15	11	4	0	yes	7	PHAGE_Salmon_118970_sal3_NC_031940(9)	0.5116
SRS2783476	1		5	4.8	incomplete(40)	plate,transposase	9	26180-31034	0	6	4	2	0	no	3	PHAGE_Salmon_SJ46_NC_031129(2)	0.5024
SRS2783476	1		6	18.5	questionable(75)	head,integrase	9	156504-175071	0	15	9	6	0	yes	3	PHAGE_Entero_P4_NC_001609(7)	0.5122
SRS2783476	1		7	7.4	incomplete(20)	integrase	10	32168-39621	0	10	6	4	0	yes	3	PHAGE_Salmon_Fels_2_NC_010463(3) PHAGE_Salmon_SJ46_NC_031129(3)	0.4693
SRS2783476	1		8	24.9	questionable(80)	integrase,lysin,tail,terminase	11	161760-186732	0	16	11	5	0	yes	7	PHAGE_Salmon_Fels_1_NC_010391(5)	0.5168
SRS2783476	1		9	9.8	incomplete(20)	tail	12	36948-46810	1	14	7	7	0	no	6	PHAGE_Shigel_SfIV_NC_022749(2)	0.4429
SRS2783476	1		10	23.4	incomplete(60)	integrase,recombinase,transposase	18	12368-35785	0	40	17	23	0	yes	15	PHAGE_Entero_N15_NC_001901(3)	0.5484
SRS2783476	1		11	33.5	intact(150)	tail,head,transposase,capsid,portal,terminase,lysis,lysin,integrase	21	1-33532	0	45	44	1	0	yes	9	PHAGE_Phage_Gifsy_1_NC_010392(32)	0.514
SRS2850296	1		1	49.8	intact(150)	integrase,lysin,terminase,portal,head,capsid,tail,plate,transposase	1	199740-249625	0	69	53	16	0	yes	28	PHAGE_Edward_GF_2_NC_026611(16)	0.5083
SRS2850296	1		2	6.1	incomplete(40)	lysin,tail,transposase	1	253544-259721	0	10	7	3	0	no	7	PHAGE_Entero_cdtI_NC_009514(2)	0.4179
SRS2850296	1		3	23.7	questionable(80)	tail,terminase,lysin,integrase	1	893894-917650	0	16	11	5	0	yes	7	PHAGE_Salmon_Fels_1_NC_010391(5)	0.4941
SRS2850296	1		4	40	intact(150)	plate,tail,lysin,lysis,terminase,capsid,portal,integrase	2	634648-674743	0	49	42	7	0	yes	9	PHAGE_Salmon_Fels_2_NC_010463(33)	0.5342
SRS2850296	1		5	11.2	questionable(75)	integrase,head	3	259297-270564	0	13	11	2	0	no	4	PHAGE_Entero_P4_NC_001609(7)	0.4935
SRS2850296	1		6	45.9	incomplete(60)	lysis,head,integrase	5	3-45965	2	53	49	4	0	yes	12	PHAGE_Salmon_118970_sal4_NC_030919(22)	0.4772
SRS2850296	1		7	7.4	incomplete(20)	integrase	7	32128-39572	0	10	6	4	0	yes	3	PHAGE_Salmon_Fels_2_NC_010463(3) PHAGE_Salmon_SJ46_NC_031129(3)	0.4696
SRS2850296	1		8	85.8	questionable(90)	tail,head,transposase	12	3-85841	0	101	82	19	0	no	13	PHAGE_Escher_RCS47_NC_042128(66)	0.4938
SRS2850296	1		9	25.4	intact(150)	plate,lysin,lysis,terminase,portal,head,capsid,transposase,tail	17	1127-26608	0	37	36	1	0	no	9	PHAGE_Phage_Gifsy_1_NC_010392(27)	0.5056
SRS2850296	1		10	24.8	intact(100)	tail,protease,portal,terminase	18	288-25107	0	36	28	8	0	no	11	PHAGE_Phage_Gifsy_2_NC_010393(15)	0.5177
SRS2922972	1		1	26.1	incomplete(30)	integrase,tail	1	179801-205961	0	14	10	4	0	yes	6	PHAGE_Salmon_118970_sal3_NC_031940(8)	0.487
SRS2922972	1		2	106.8	intact(150)	integrase,head,portal,tail,flippase	1	423995-530799	2	113	103	10	0	yes	28	PHAGE_Entero_mEp390_NC_019721(13)	0.4806
SRS2922972	1		3	9.9	questionable(75)	integrase,head	3	259121-269107	0	11	10	1	0	yes	3	PHAGE_Entero_P4_NC_001609(7)	0.4919
SRS2922972	1		4	7.4	incomplete(20)	integrase	4	32471-39923	0	10	6	4	0	yes	3	PHAGE_Salmon_Fels_2_NC_010463(3)	0.4693
SRS2922972	1		5	9.8	incomplete(20)	tail	4	245945-255807	1	14	7	7	0	no	6	PHAGE_Shigel_SfIV_NC_022749(2)	0.443
SRS2922972	1		6	24.9	questionable(80)	integrase,lysin,tail,terminase	6	361411-386383	0	17	11	6	0	yes	7	PHAGE_Salmon_Fels_1_NC_010391(5)	0.5169
SRS2922972	1		7	45.2	intact(150)	integrase,lysin,terminase,portal,protease,tail	8	248079-293338	0	50	44	6	0	yes	14	PHAGE_Phage_Gifsy_1_NC_010392(25) PHAGE_Phage_Gifsy_2_NC_010393(25)	0.5304
SRS2922972	1		8	32.8	intact(150)	integrase,portal,terminase,capsid,tail,lysis,lysin,plate	12	7707-40579	0	43	40	3	0	yes	5	PHAGE_Salmon_Fels_2_NC_010463(35)	0.5242
SRS2922972	1		9	18.1	incomplete(30)	tail,integrase	16	1-18176	0	26	20	6	0	yes	7	PHAGE_Salmon_SEN34_NC_028699(13)	0.4966
SRS2998834	3		1	4.8	incomplete(40)	plate,transposase	12	26176-31030	0	6	4	2	0	no	3	PHAGE_Salmon_SJ46_NC_031129(2)	0.5024
SRS2998834	3		2	30.8	intact(150)	integrase,head,portal,tail,plate,lysin,terminase	19	47861-78755	0	40	29	11	0	yes	14	PHAGE_Phage_Gifsy_1_NC_010392(9)	0.491
SRS2998834	3		3	15.5	incomplete(20)	integrase	28	19421-34929	0	16	10	6	0	yes	6	PHAGE_Phage_Gifsy_1_NC_010392(5)	0.4965
SRS2998834	3		4	26.6	intact(120)	lysin,tail,terminase,portal,head,capsid,plate	28	35342-62014	0	36	32	4	0	no	14	PHAGE_Edward_GF_2_NC_026611(15)	0.5251
SRS2998834	3		5	31	questionable(90)	terminase,tail,lysin,integrase	32	6921-37978	0	44	35	9	0	yes	21	PHAGE_Salmon_SEN34_NC_028699(14)	0.4926
SRS2998855	3		1	34.9	intact(150)	tail,plate,lysin,lysis,terminase,capsid,portal,integrase,recombinase	1	17063-51983	0	47	42	5	0	yes	9	PHAGE_Salmon_Fels_2_NC_010463(33)	0.5179
SRS2998855	3		2	6.1	incomplete(40)	transposase,tail,lysin	2	679237-685414	0	10	7	3	0	no	7	PHAGE_Entero_cdtI_NC_009514(2)	0.4183
SRS2998855	3		3	9.8	incomplete(20)	tail	3	398716-408578	1	13	7	6	0	no	6	PHAGE_Shigel_SfIV_NC_022749(2)	0.443
SRS2998855	3		4	7.4	incomplete(20)	integrase	3	614589-622033	0	10	6	4	0	yes	3	PHAGE_Salmon_Fels_2_NC_010463(3) PHAGE_Salmon_SJ46_NC_031129(3)	0.4696
SRS2998855	3		5	32.2	incomplete(60)	tail,terminase,integrase	4	383042-415323	0	24	21	3	0	yes	8	PHAGE_Salmon_118970_sal3_NC_031940(23)	0.4946
SRS2998855	3		6	24.9	questionable(80)	integrase,lysin,tail,terminase	10	90192-115164	0	16	11	5	0	yes	7	PHAGE_Salmon_Fels_1_NC_010391(5)	0.5171
SRS2998855	3		7	16.5	incomplete(20)	integrase	14	22651-39184	0	12	11	1	0	yes	6	PHAGE_Salmon_SEN34_NC_028699(7)	0.5164
SRS2998855	3		8	14.5	incomplete(40)	lysin,tail,terminase	16	1-14540	0	19	15	4	0	no	10	PHAGE_Phage_Gifsy_1_NC_010392(6)	0.5017
SRS2998855	3		9	15	incomplete(20)	integrase	17	12067-27144	0	17	13	4	0	yes	6	PHAGE_Salmon_SEN34_NC_028699(8)	0.5037
SRS2998855	3		10	16	intact(140)	terminase,portal,protease,tail	20	2-16021	0	18	17	1	0	no	2	PHAGE_Salmon_Fels_1_NC_010391(15)	0.5663
SRS2998913	3		1	7.4	incomplete(20)	integrase	1	139-7583	0	10	6	4	0	yes	3	PHAGE_Salmon_Fels_2_NC_010463(3) PHAGE_Salmon_SJ46_NC_031129(3)	0.4696
SRS2998913	3		2	9.8	incomplete(20)	tail	1	213605-223467	1	14	7	7	0	no	6	PHAGE_Shigel_SfIV_NC_022749(2)	0.443
SRS2998913	3		3	40	intact(150)	integrase,tail,terminase,portal,protease	1	811222-851283	0	44	39	5	0	yes	9	PHAGE_Salmon_118970_sal3_NC_031940(23)	0.5261
SRS2998913	3		4	4.8	incomplete(40)	plate,transposase	2	516919-521773	0	6	4	2	0	no	3	PHAGE_Salmon_SJ46_NC_031129(2)	0.5022
SRS2998913	3		5	36.5	intact(150)	plate,tail,lysin,lysis,terminase,capsid,portal,integrase,recombinase	2	646945-683510	0	41	35	6	0	yes	8	PHAGE_Salmon_Fels_2_NC_010463(27)	0.5033
SRS2998913	3		6	6.1	incomplete(40)	transposase,tail,lysin	4	637344-643521	0	10	7	3	0	no	7	PHAGE_Entero_cdtI_NC_009514(2)	0.4179
SRS2998913	3		7	13.8	questionable(80)	tail,terminase,lysin,integrase	6	493-14299	0	16	11	5	0	yes	7	PHAGE_Salmon_Fels_1_NC_010391(5)	0.4955
SRS2998913	3		8	12.9	incomplete(40)	lysin,tail,terminase	13	3-12949	0	17	14	3	0	no	9	PHAGE_Phage_Gifsy_1_NC_010392(6)	0.5075
SRS2998913	3		9	15	incomplete(20)	integrase	14	150-15215	0	17	13	4	0	yes	6	PHAGE_Salmon_SEN34_NC_028699(8)	0.5038
SRS3080188	3		1	33.6	questionable(90)	integrase,lysin,tail,terminase	1	367108-400762	0	16	11	5	0	yes	7	PHAGE_Salmon_Fels_1_NC_010391(5)	0.4936
SRS3080188	3		2	6.1	incomplete(40)	transposase,tail,lysin	1	1071333-1077510	0	10	7	3	0	no	7	PHAGE_Entero_cdtI_NC_009514(2)	0.4179
SRS3080188	3		3	14.5	incomplete(40)	lysin,tail,terminase	2	1-14540	0	19	15	4	0	no	10	PHAGE_Phage_Gifsy_1_NC_010392(6)	0.5017
SRS3080188	3		4	7.4	incomplete(20)	integrase	2	32391-39835	0	10	6	4	0	yes	3	PHAGE_Salmon_Fels_2_NC_010463(3) PHAGE_Salmon_SJ46_NC_031129(3)	0.4696
SRS3080188	3		5	9.8	incomplete(20)	tail	2	245857-255719	1	14	7	7	0	no	6	PHAGE_Shigel_SfIV_NC_022749(2)	0.443
SRS3080188	3		6	35.2	intact(150)	integrase,tail,terminase,portal,protease	2	843643-878925	0	38	33	5	0	yes	9	PHAGE_Salmon_118970_sal3_NC_031940(23)	0.5235
SRS3080188	3		7	4.8	incomplete(40)	plate,transposase	3	516285-521139	0	6	4	2	0	no	3	PHAGE_Salmon_SJ46_NC_031129(2)	0.5022
SRS3080188	3		8	34.8	intact(150)	recombinase,integrase,portal,terminase,capsid,tail,lysis,lysin,plate	3	678739-713614	0	48	43	5	0	yes	9	PHAGE_Salmon_Fels_2_NC_010463(34)	0.5179
SRS3080188	3		9	17.3	incomplete(20)	integrase	10	686-18078	0	13	12	1	0	yes	6	PHAGE_Salmon_SEN34_NC_028699(8)	0.5145
SRS3080188	3		10	15	incomplete(20)	integrase	13	150-15215	0	17	13	4	0	yes	6	PHAGE_Salmon_SEN34_NC_028699(8)	0.5038
SRS3453943	1		1	15	incomplete(40)	integrase,tail,transposase	1	189317-204374	0	20	13	7	0	yes	9	PHAGE_Salmon_118970_sal3_NC_031940(8)	0.4956
SRS3453943	1		2	33.6	questionable(90)	tail,terminase,lysin,integrase	1	844373-878027	0	16	11	5	0	yes	7	PHAGE_Salmon_Fels_1_NC_010391(5)	0.4934
SRS3453943	1		3	44	intact(150)	tail,plate,lysin,lysis,terminase,capsid,portal,integrase	2	34823-78921	0	48	46	2	0	yes	6	PHAGE_Salmon_Fels_2_NC_010463(41)	0.5326
SRS3453943	1		4	44.4	intact(150)	tail,head,transposase,capsid,portal,terminase,lysis,lysin,integrase	3	1-44499	0	49	46	3	0	yes	10	PHAGE_Phage_Gifsy_1_NC_010392(35)	0.5243
SRS3453943	1		5	9.8	incomplete(20)	tail	3	445116-454978	1	13	7	6	0	no	6	PHAGE_Shigel_SfIV_NC_022749(2)	0.443
SRS3453943	1		6	7.4	incomplete(20)	integrase	3	660988-668441	0	10	6	4	0	yes	3	PHAGE_Salmon_Fels_2_NC_010463(3) PHAGE_Salmon_SJ46_NC_031129(3)	0.4691
SRS3453943	1		7	11.7	questionable(85)	head,integrase	4	376808-388563	0	13	11	2	0	yes	3	PHAGE_Entero_P4_NC_001609(8)	0.4859
SRS3453943	1		8	18.1	incomplete(30)	tail,integrase	14	1-18176	0	26	20	6	0	yes	7	PHAGE_Salmon_SEN34_NC_028699(13)	0.4965
SRS3471848	1		1	25.5	questionable(80)	tail,head,portal,plate	1	317762-343360	0	33	23	10	0	no	12	PHAGE_Erwini_phiEt88_NC_015295(10)	0.4808
SRS3471848	1		2	33.6	questionable(90)	tail,terminase,lysin,integrase	1	680116-713770	0	17	11	6	0	yes	7	PHAGE_Salmon_Fels_1_NC_010391(5)	0.4934
SRS3471848	1		3	7.4	incomplete(20)	integrase	2	32471-39923	0	10	6	4	0	yes	3	PHAGE_Salmon_Fels_2_NC_010463(3) PHAGE_Salmon_SJ46_NC_031129(3)	0.4693
SRS3471848	1		4	9.8	incomplete(20)	tail	2	245945-255807	1	14	7	7	0	no	6	PHAGE_Shigel_SfIV_NC_022749(2)	0.443
SRS3471848	1		5	33.1	intact(140)	integrase,lysin,terminase,portal,protease,tail	2	656424-689557	0	41	35	6	0	yes	13	PHAGE_Phage_Gifsy_2_NC_010393(20)	0.5195
SRS3471848	1		6	9.9	questionable(75)	integrase,head	3	294656-304642	0	11	10	1	0	yes	3	PHAGE_Entero_P4_NC_001609(7)	0.4919
SRS3471848	1		7	4.8	incomplete(40)	plate,transposase	4	228964-233818	0	6	4	2	0	no	3	PHAGE_Salmon_SJ46_NC_031129(2)	0.5024
SRS3471848	1		8	47.6	intact(150)	integrase,portal,terminase,capsid,tail,lysis,lysin,plate	4	367089-414693	0	43	40	3	0	yes	5	PHAGE_Salmon_Fels_2_NC_010463(35)	0.4938
SRS3471848	1		9	15.1	incomplete(20)	integrase	14	1-15163	0	18	14	4	0	yes	6	PHAGE_Salmon_SEN34_NC_028699(9)	0.5037
SRS3471848	1		10	21.4	intact(140)	tail,transposase,head,capsid,portal,terminase,lysis,lysin	15	250-21677	0	32	31	1	0	no	11	PHAGE_Phage_Gifsy_1_NC_010392(19)	0.5142
SRS3708648	1		1	6.1	incomplete(40)	transposase,tail,lysin	1	637450-643627	0	10	7	3	0	no	7	PHAGE_Entero_cdtI_NC_009514(2)	0.4179
SRS3708648	1		2	26.5	incomplete(40)	transposase,tail,integrase	1	636400-662935	0	19	13	6	0	yes	9	PHAGE_Salmon_118970_sal3_NC_031940(8)	0.4563
SRS3708648	1		3	11.7	questionable(85)	head,integrase	3	376790-388545	0	13	11	2	0	yes	3	PHAGE_Entero_P4_NC_001609(8)	0.4859
SRS3708648	1		4	13.2	questionable(80)	tail,terminase,lysin,integrase	6	145-13418	0	16	11	5	0	yes	7	PHAGE_Salmon_Fels_1_NC_010391(5)	0.4946
SRS3708648	1		5	9.8	incomplete(20)	tail	7	129456-139318	1	13	7	6	0	no	6	PHAGE_Shigel_SfIV_NC_022749(2)	0.443
SRS3708648	1		6	7.4	incomplete(20)	integrase	7	345329-352781	0	10	6	4	0	yes	3	PHAGE_Salmon_Fels_2_NC_010463(3) PHAGE_Salmon_SJ46_NC_031129(3)	0.4693
SRS3708648	1		7	42.6	intact(150)	tail,protease,portal,terminase,lysin,integrase	8	1-42675	0	48	42	6	0	yes	13	PHAGE_Phage_Gifsy_1_NC_010392(24) PHAGE_Phage_Gifsy_2_NC_010393(24)	0.5293
SRS3708648	1		8	18.1	incomplete(30)	tail,integrase	16	1-18176	0	26	20	6	0	yes	7	PHAGE_Salmon_SEN34_NC_028699(13)	0.4965
SRS2442415	nc		1	7.4	incomplete(20)	integrase	1	32601-40063	0	11	7	4	0	yes	4	PHAGE_Salmon_Fels_2_NC_010463(3) PHAGE_Salmon_SJ46_NC_031129(3)	0.4688
SRS2442415	nc		2	9.8	incomplete(20)	tail	1	246079-255941	1	14	7	7	0	no	6	PHAGE_Shigel_SfIV_NC_022749(2)	0.443
SRS2442415	nc		3	41.4	incomplete(50)	integrase,head	1	462986-504457	0	53	50	3	0	yes	18	PHAGE_Salmon_118970_sal4_NC_030919(16)	0.4796
SRS2442415	nc		4	28.6	incomplete(20)	integrase	1	869161-897853	0	24	20	4	0	yes	5	PHAGE_Salmon_SEN34_NC_028699(16)	0.4905
SRS2442415	nc		5	6.1	incomplete(40)	transposase,tail,lysin	2	638233-644410	0	10	7	3	0	no	7	PHAGE_Entero_cdtI_NC_009514(2)	0.4178
SRS2442415	nc		6	33.2	intact(130)	integrase,portal,terminase,capsid,tail	3	136904-170179	1	41	35	6	0	yes	18	PHAGE_Aeromo_phiO18P_NC_009542(17)	0.5125
SRS2442415	nc		7	12	incomplete(30)	head,integrase	4	146778-158780	0	13	7	6	0	yes	2	PHAGE_Entero_P4_NC_001609(6)	0.4865
SRS2442415	nc		8	17.4	questionable(70)	tail,terminase,lysin,integrase	6	634-18104	0	14	10	4	0	yes	7	PHAGE_Salmon_Fels_1_NC_010391(4)	0.5167
SRS2442415	nc		9	27.1	intact(150)	terminase,portal,protease,tail	9	3-27108	0	32	29	3	0	no	8	PHAGE_Phage_Gifsy_1_NC_010392(19) PHAGE_Phage_Gifsy_2_NC_010393(19)	0.5555
SRS2442415	nc		10	42.5	intact(110)	integrase,terminase,head,protease,capsid,tail,lysin	9	133947-176477	0	53	44	9	0	yes	6	PHAGE_Salmon_SPN1S_NC_016761(34)	0.5078
SRS2442415	nc		11	36.4	intact(150)	integrase,capsid,terminase,head,tail,lysis,plate	14	1333-37781	0	45	42	3	0	yes	8	PHAGE_Salmon_RE_2010_NC_019488(35)	0.5035
SRS2442415	nc		12	10.1	incomplete(40)	lysin,terminase,tail	20	3-10156	1	15	13	2	0	no	6	PHAGE_Phage_Gifsy_1_NC_010392(8)	0.5032
SRS2547178	nc		1	33.6	questionable(90)	integrase,lysin,tail,terminase	1	362235-395889	0	17	11	6	0	yes	7	PHAGE_Salmon_Fels_1_NC_010391(5)	0.4935
SRS2547178	nc		2	6	incomplete(40)	transposase,tail,lysin	1	1042214-1048310	0	9	7	2	0	no	7	PHAGE_Entero_cdtI_NC_009514(2)	0.4174
SRS2547178	nc		3	15.3	incomplete(40)	transposase,tail,integrase	1	1052300-1067692	0	22	13	9	0	yes	9	PHAGE_Salmon_118970_sal3_NC_031940(8)	0.4935
SRS2547178	nc		4	33	incomplete(40)	terminase,plate	1	1233201-1266297	1	37	25	12	0	yes	16	PHAGE_Pectob_ZF40_NC_019522(10)	0.4981
SRS2547178	nc		5	9.8	incomplete(20)	tail	1	1696351-1706213	1	13	7	6	0	no	6	PHAGE_Shigel_SfIV_NC_022749(2)	0.4429
SRS2547178	nc		6	10.7	incomplete(40)	tail,integrase	1	1912419-1923145	0	16	12	4	0	yes	10	PHAGE_Salmon_SJ46_NC_031129(4)	0.4621
SRS2547178	nc		7	35	intact(100)	tail,terminase,capsid,portal,integrase	2	1412-36492	0	34	28	6	0	yes	13	PHAGE_Haemop_HP2_NC_003315(14) PHAGE_Aeromo_phiO18P_NC_009542(14) PHAGE_Haemop_HP1_NC_001697(14)	0.5172
SRS2547178	nc		8	10.6	incomplete(50)	portal,protease,tail	5	137-10809	0	18	17	1	0	no	5	PHAGE_Phage_Gifsy_2_NC_010393(11)	0.5115
SRS2547178	nc		9	35.1	questionable(84)	lysin,tail	8	114433-149537	0	47	37	10	0	no	7	PHAGE_Burkho_BcepMu_NC_005882(30)	0.5515
SRS2547178	nc		10	34.2	intact(140)	integrase,portal,terminase,capsid,plate,tail	11	9797-44020	0	47	45	2	0	yes	5	PHAGE_Entero_PsP3_NC_005340(38)	0.5203
SRS2547178	nc		11	5.7	incomplete(20)	integrase	15	5719-01-01	0	11	11	0	0	no	5	PHAGE_Salmon_SEN34_NC_028699(7)	0.5015
SRS2547178	nc		12	27.9	questionable(80)	lysin,lysis,terminase,portal,head	19	3-27931	0	41	38	3	0	no	18	PHAGE_Vibrio_VBM1_NC_020850(14)	0.5045
SRS2547178	nc		13	15.4	incomplete(20)	integrase	20	12067-27483	0	18	14	4	0	yes	6	PHAGE_Salmon_SEN34_NC_028699(9)	0.5044
SRS2628542	nc		1	6.1	incomplete(40)	transposase,tail,lysin	1	530662-536839	0	9	7	2	0	no	7	PHAGE_Entero_cdtI_NC_009514(2)	0.4176
SRS2628542	nc		2	52.5	intact(150)	transposase,tail,head,capsid,portal,terminase,lysis,lysin,integrase	1	542253-594796	0	64	57	7	0	yes	21	PHAGE_Phage_Gifsy_1_NC_010392(33)	0.516
SRS2628542	nc		3	9.8	incomplete(20)	tail	1	1180776-1190638	1	13	7	6	0	no	6	PHAGE_Shigel_SfIV_NC_022749(2)	0.4431
SRS2628542	nc		4	14	incomplete(50)	tail,plate,integrase	1	1396728-1410780	0	20	13	7	0	yes	5	PHAGE_Salmon_SEN34_NC_028699(7)	0.4871
SRS2628542	nc		5	11.8	questionable(85)	integrase,head	2	260133-272020	0	14	10	4	0	yes	2	PHAGE_Entero_P4_NC_001609(8)	0.4658
SRS2628542	nc		6	33.6	questionable(90)	integrase,lysin,tail,terminase	3	362239-395893	0	17	11	6	0	yes	7	PHAGE_Salmon_Fels_1_NC_010391(5)	0.4933
SRS2628542	nc		7	44	intact(150)	tail,plate,capsid,head,portal,terminase,lysis,integrase	4	384192-428240	0	52	45	7	0	yes	11	PHAGE_Phage_Gifsy_1_NC_010392(19)	0.5196
SRS2628542	nc		8	11.6	questionable(75)	integrase,head	5	42539-54158	0	12	9	3	0	yes	3	PHAGE_Entero_P4_NC_001609(7)	0.4766
SRS2655760	nc		1	33.6	questionable(90)	integrase,lysin,tail,terminase	1	362420-396074	0	17	11	6	0	yes	7	PHAGE_Salmon_Fels_1_NC_010391(5)	0.4935
SRS2655760	nc		2	6.1	incomplete(40)	transposase,tail,lysin	1	1025563-1031740	0	9	7	2	0	no	7	PHAGE_Entero_cdtI_NC_009514(2)	0.4178
SRS2655760	nc		3	28.5	intact(150)	transposase,tail,head,capsid,portal,terminase	1	1037154-1065745	0	27	25	2	0	no	3	PHAGE_Phage_Gifsy_1_NC_010392(23)	0.5427
SRS2655760	nc		4	7.4	incomplete(20)	integrase	2	32602-40029	0	10	6	4	0	yes	3	PHAGE_Salmon_Fels_2_NC_010463(3) PHAGE_Salmon_SJ46_NC_031129(3)	0.4698
SRS2655760	nc		5	9.8	incomplete(20)	tail	2	246048-255910	1	14	7	7	0	no	6	PHAGE_Shigel_SfIV_NC_022749(2)	0.4428
SRS2655760	nc		6	17.3	incomplete(20)	integrase	2	841990-859333	0	23	14	9	0	yes	11	PHAGE_Shigel_POCJ13_NC_025434(4) PHAGE_Shigel_Stx_NC_029120(4)	0.4931
SRS2655760	nc		7	19.5	incomplete(30)	integrase,head	5	282022-301567	0	9	7	2	0	yes	2	PHAGE_Entero_P4_NC_001609(6)	0.5122
SRS2655760	nc		8	7.3	incomplete(30)	integrase,head	14	42642-50015	0	11	9	2	0	yes	4	PHAGE_Entero_P4_NC_001609(6)	0.4725
SRS2655760	nc		9	19.4	incomplete(20)	integrase	16	223-19706	0	32	27	5	0	yes	9	PHAGE_Salmon_SEN34_NC_028699(19)	0.4983
SRS2709963	nc		1	9.8	incomplete(20)	tail	1	266117-275979	1	14	7	7	0	no	6	PHAGE_Shigel_SfIV_NC_022749(2)	0.4426
SRS2709963	nc		2	9.4	incomplete(40)	integrase,plate,tail	1	483027-492468	0	10	9	1	0	yes	7	PHAGE_Salmon_SPN9CC_NC_017985(3)	0.4361
SRS2709963	nc		3	23.1	incomplete(30)	integrase,tail	1	856768-879930	0	13	8	5	0	yes	5	PHAGE_Salmon_118970_sal3_NC_031940(7)	0.5013
SRS2709963	nc		4	33.6	questionable(90)	tail,terminase,lysin,integrase	2	646069-679723	0	17	11	6	0	yes	7	PHAGE_Salmon_Fels_1_NC_010391(5)	0.4936
SRS2709963	nc		5	66	intact(150)	tail,head,plate,lysis,terminase,capsid,integrase,portal	3	42603-108672	0	86	71	15	0	yes	17	PHAGE_Salmon_RE_2010_NC_019488(35) PHAGE_Salmon_Fels_2_NC_010463(35)	0.5054
SRS2709963	nc		6	45.6	intact(150)	integrase,lysis,lysin,terminase,portal,head,capsid,tail,plate	5	19485-65138	1	56	50	6	0	yes	13	PHAGE_Phage_Gifsy_1_NC_010392(19)	0.4997
