# Supplementary material for: Genomic characterization and phylogenetic analysis of Salmonella enterica serovar Javiana
Source: PeerJ. 2020 Nov 20;8:e10256. doi: 10.7717/peerj.10256 (PMC7682435; doi:10.7717/peerj.10256)
Supplement: Data S6 — (A) Virulence factors determined by VFanalyzer and (B) Salmonella pathogenicity islands determined by SPIfinder. [file peerj-08-10256-s010.xlsx]

## Sheet: Dats S6
Data S6. Virulence Factors and Salmonella Pathogenicity Islands (PAIs)
(A) Virulence factors determined by VFanalyzer and (B) Salmonella pathogenicity islands determined by SPIfinder.

## Sheet: A_Virulence Factors
		VF Class	Capsule										Fimbrial adherence determinants
		Virulence Factor	Vi antigen										Agf/Csg							Bcf							Fim									Lpf					Pef				Peg				Saf
Isolate	Clade	Description Gene	tviA	tviB	tviC	tviD	tviE	vexA	vexB	vexC	vexD	vexE	csgA	csgB	csgC	csgD	csgE	csgF	csgG	bcfA	bcfB	bcfC	bcfD	bcfE	bcfF	bcfG	fimA	fimC	fimD	fimF	fimH	fimI	fimW	fimY	fimZ	lpfA	lpfB	lpfC	lpfD	lpfE	pefA	pefB	pefC	pefD	pegA	pegB	pegC	pegD	safA
SRS2420927	1	Reference (internal; draft)											X	X	X	X	X	X	X	X	X	X	X	X	X	X	X	X	X	X	X	X	X	X	X			X							X	X	X	X
SRS3932840	1	outbreak isolate											X	X	X	X	X	X	X	X	X	X	X	X	X	X	X	X	X	X	X	X	X	X	X			X							X	X	X	X
SRS2628565	1												X	X	X	X	X	X	X	X	X	X	X	X	X	X	X	X	X	X	X	X		X	X			X							X	X	X	X
SRS2547237	1												X	X	X	X	X	X	X	X	X	X	X	X	X	X	X	X	X	X	X	X	X	X	X			X							X	X	X	X
SRS2628553	1												X	X	X	X	X	X	X	X	X	X	X	X	X	X	X	X	X	X	X	X	X	X	X			X							X	X	X	X
SRS2850296	1												X	X	X	X	X	X	X	X	X	X	X	X	X	X	X	X	X	X	X	X	X	X	X			X							X	X	X	X
SRS2783476	1												X	X		X	X	X	X	X	X	X	X	X	X	X	X	X	X	X	X	X	X	X	X			X							X	X	X	X
SRS2922972	1												X	X	X	X	X	X	X	X	X	X	X	X	X	X	X	X	X	X	X	X	X	X	X			X							X	X	X	X
SRS3453943	1												X	X	X	X	X	X	X	X	X	X	X	X	X	X	X	X	X	X	X	X	X	X	X			X							X	X	X	X
SRS3471848	1												X	X	X	X	X	X	X	X	X	X	X	X	X	X	X	X	X	X	X	X	X	X	X			X							X	X	X	X
SRS3708648	1												X	X	X	X	X	X	X	X	X	X	X	X	X	X	X	X	X	X	X	X	X	X	X			X							X	X	X	X
SRS2822480	2	Reference (internal; draft)											X	X	X	X	X	X	X	X	X	X	X	X	X	X	X	X	X	X	X	X	X	X	X			X					PL	PL	X	X	X	X
SRS3975519	2	outbreak isolate											X	X	X	X	X	X	X	X	X	X	X	X	X	X	X	X	X	X	X	X	X	X	X			X					PL	PL	X	X	X	X
SRS3944395	2	outbreak isolate											X	X	X	X	X	X	X	X	X	X	X	X	X	X	X	X	X	X	X	X	X	X	X			X					PL	PL	X	X	X	X
SRS2442409	2												X	X	X	X	X	X	X	X	X	X	X	X	X	X	X	X	X	X	X	X	X	X	X			X					PL	PL	X	X	X	X
GCF_000341425.1	2	Reference (external; closed)
SRS3010019	3	Reference (internal; draft)											X	X	X	X	X	X	X	X	X	X	X	X	X	X	X	X	X	X	X	X	X	X	X			X							X	X	X	X
SRS3643364	3												X	X		X	X	X	X	X	X	X	X	X	X	X	X	X	X	X	X	X	X	X	X			X							X	X	X	X
SRS3721796	3												X	X	X	X	X	X	X	X	X	X	X	X	X	X	X	X	X	X	X	X	X	X	X			X							X	X	X	X
SRS3799118	3												X	X		X	X	X	X	X	X	X	X	X	X	X	X	X	X	X	X	X	X	X	X			X							X	X	X	X
SRS2420915	3												X	X	X	X	X	X	X	X	X	X	X	X	X	X	X	X	X	X	X	X	X	X	X			X							X	X	X	X
SRS2609378	3												X	X	X	X	X	X	X	X	X	X	X	X	X	X	X	X	X	X	X	X	X	X	X			X							X	X	X	X
SRS2761300	3												X	X	X	X	X	X	X	X	X	X	X	X	X	X	X	X	X	X	X	X	X	X	X			X							X	X	X	X
SRS2998834	3												X	X		X	X	X	X	X	X	X	X	X	X	X	X	X	X	X	X	X			X			X							X	X	X	X
SRS2998855	3												X	X	X	X	X	X	X	X	X	X	X	X	X	X	X	X	X	X	X	X	X	X	X			X							X	X	X	X
SRS2998913	3												X	X		X	X	X	X	X	X	X	X	X	X	X	X	X	X	X	X	X	X	X	X			X							X	X	X	X
SRS3080188	3												X	X	X	X	X	X	X	X	X	X	X	X	X	X	X	X	X	X	X	X	X	X	X			X							X	X	X	X
SRS2442415	N/A												X	X		X	X	X	X	X	X	X	X	X	X	X	X	X	X	X	X	X	X	X	X			X							X	X	X	X
SRS2547178	N/A												X	X	X	X	X	X	X	X	X	X	X	X	X	X	X	X	X	X	X	X	X	X	X			X							X	X	X	X
SRS2628542	N/A												X	X	X	X	X	X	X	X	X	X	X	X	X	X	X	X	X	X	X	X	X	X	X			X				X			X	X	X	X
SRS2655760	N/A												X	X	X	X	X	X	X	X	X	X	X	X	X	X	X	X	X	X	X	X	X	X	X			X							X	X	X	X
SRS2709963	N/A												X	X		X	X	X	X	X	X	X	X	X	X	X	X	X	X	X	X	X	X	X	X			X				X			X	X	X	X	X
[truncated: 197 more columns]

## Sheet: B_SPI
Genome	Clade	Description	SPI
			C63PI	SPI-2	SPI-4	SPI-13	SPI-14
SRS2420927	1	Reference (internal; draft)	X	X	X	X	X
SRS3932840	1	outbreak isolate	X	X	X	X	X
SRS2628565	1		X	X	X	X	X
SRS2547237	1		X	X	X	X	X
SRS2628553	1		X	X	X	X	X
SRS2783476	1		X	X	X	X	X
SRS2850296	1		X	X	X	X	X
SRS2922972	1		X	X	X	X	X
SRS3453943	1		X	X		X	X
SRS3471848	1		X	X	X	X	X
SRS3708648	1		X	X	X	X	X
GCF_000341425.1	2	Reference (external; closed)	X		X	X	X
SRS2822480	2	Reference (internal; draft)	X	X	X	X	X
SRS3944395	2	outbreak isolate	X	X	X	X	X
SRS3975519	2	outbreak isolate	X	X	X	X	X
SRS2442409	2		X		X	X	X
SRS3010019	3	Reference (internal; draft)	X	X	X	X	X
SRS3643364	3		X	X		X	X
SRS3721796	3		X	X	X	X	X
SRS3799118	3		X	X	X	X	X
SRS2420915	3		X	X	X	X	X
SRS2609378	3		X	X	X	X	X
SRS2761300	3		X	X	X	X	X
SRS2998834	3		X			X	X
SRS2998855	3		X	X	X	X	X
SRS2998913	3		X	X	X	X	X
SRS3080188	3		X	X	X	X	X
SRS2442415	N/A		X	X	X	X	X
SRS2547178	N/A		X	X	X	X	X
SRS2628542	N/A		X	X	X	X	X
SRS2655760	N/A		X	X	X	X	X
SRS2709963	N/A		X	X	X	X	X
