# Supplementary material for: Genomic characterization and phylogenetic analysis of Salmonella enterica serovar Javiana
Source: PeerJ. 2020 Nov 20;8:e10256. doi: 10.7717/peerj.10256 (PMC7682435; doi:10.7717/peerj.10256)
Supplement: Data S7 [file peerj-08-10256-s011.xlsx]

## Sheet: Data S7
Data S7. Scoary Results (full)

## Sheet: Summary
CLADE I
Isolate	Contig	Start		Stop		Annotation(s)		MGE Region
SRS2420927	1	105099		105518		h.p.*
SRS2420927	1	420332		421603		Exodeoxyribonuclease 8		Prophage Region 2
SRS2420927	1	699132		699236		h.p.
SRS2420927	2	50693		83627		Phage baseplate assembly protein*; Phage protein*; DNA damage-inducible protein I; Phage protein*; Phage replication protein*; DNA adenine methylase; putative protein YbiI; corresponds to STY3665 from Accession AL513382: Salmonella typhi CT18*; Phage repressor protein cI*; Tyrosine recombinase XerH; Phage protein*; Prophage integrase IntA; Mobilization protein A; Transcriptional regulator, AlpA l…		Prophage Region 4
SRS2420927	2	98106		98423		h.p.
SRS2420927	2	235502		235738		Phenolic acid decarboxylase subunit D
SRS2420927	2	318691		319161		Prepilin peptidase dependent protein A precursor*
SRS2420927	3	208678		208803		h.p.
SRS2420927	3	458030		458491		h.p.
SRS2420927	3	657518		689333		Putative defective protein IntQ; Phage excisionase*; Gifsy-2 prophage RecT*; prophage protein*; Phage holin*; Lytic enzyme*; Phage portal protein*; Phage minor tail protein*		Prophage Region 7
SRS2420927	4	294839		304113		Prophage integrase IntA; Protein containing HNH endonuclease domain*; Phage polarity suppression protein*; Phage late gene regulator*; Phage capsid and scaffold protein*; Phage DNA binding protein*; Phage immunity repressor protein*; DNA replication protein, phage-associated*; DNA primase TraC		Prophage Region 8
SRS2420927	5	195020		195127		Small toxic polypeptide LdrD
SRS2420927	5	235725		236411		Periplasmic alpha-amylase
SRS2420927	5	269009		270619		Autotransporter adhesin SadA
SRS2420927	5	335429		335854		autotransporter*
SRS2420927	5	350250		350489		h.p.
SRS2420927	6	60039		60707		h.p.
SRS2420927	6	60750		60974		h.p.
SRS2420927	7	681		1367		h.p.
SRS2420927	7	1638		1892		h.p.
SRS2420927	7	197439		205343		putative regulator*; Uncharacterized phage-associated protein YdaU*; Putative DNA-binding protein*; Phytochrome-like protein cph2; Putative alkyl/aryl-sulfatase YjcS		Prophage Region 9
SRS2420927	11	33863		33967		PTS system fructose-specific EIIB'BC component
SRS2420927	12	3452		5467		Phage DNA replication protein P*; Gifsy-1 prophage cI*		Prophage Region 11
SRS2420927	15	1		618		Cytochrome c biogenesis ATP-binding export protein CcmA
SRS2420927	15	5734		6108		h.p.
SRS2628565	1	1642		2379		putative phosphatase YcdX
SRS2628565	1	109453		114795		Phage DNA replication protein O*; Phage DNA N-6-adenine methyltransferase*; Crossover junction endodeoxyribonuclease RusA; Phage tail fiber assembly protein GpG*; ISSod13, transposase*		Prophage Region 1
SRS2628565	2	675050		696164		Gifsy-2 prophage protein STM1020/STM2620*		Prophage Region 6
SRS2628565	5	58479		58904		autotransporter*
CLADE II
Isolate	Contig	Start		Stop		Annotation(s)		MGE Region
SRS2822480	1	4957		5964		Nucleoid-associated protein YejK
SRS2822480	1	385692		385856		h.p.		Prophage Region 1
SRS2822480	2	47784		63649		Secreted effector protein PipB; Prophage tail fiber assembly protein TfaE		Putative MGE
SRS2822480	2	74110		92004		Lytic enzyme*; Putative nuclease YbcO ; Gifsy-2 prophage protein STM1020/STM2620*; hypothetical phage-related protein*; Adenine DNA methyltransferase, phage-associated*; DNA helicase, phage-associated*; Primosomal protein I*; Tyrosine recombinase XerC		Prophage Region 3
SRS2822480	2	130029		149379		Uncharacterized protein YmfQ in lambdoid prophage e14 region*; Putative protein JayE from lambdoid prophage e14 region*; Prophage baseplate assembly protein V*; Prophage tail protein*; Phage tail/DNA circulation protein*; Phage tail tube protein*; Bacteriophage tail sheath protein*; Mu-like prophage FluMu protein GP38*; IS, phage, Tn, Transposon-related functions*; Phage major capsid protein*; Pr…		Prophage Region 4
SRS2822480	2	191666		192127		DNA internalization-related competence protein ComEC/Rec2*
SRS2822480	2	791655		829140		Phage tail fibers*; putative antirepressor protein*; Phage DNA transfer protein*; Bacteriophage terminase, large subunit*; Phage terminase, small subunit*; Phage protein*; Phage protein*; Phage antitermination protein N*; antirestriction protein*; Phage protein*; DNA recombinase, phage-associated*; Phage essential recombination function protein, Erf*; Phage anti-RecBCD 1*; Phage protein (ACLAME 7…		Prophage Region 6
SRS2822480	3	150966		168230		putative restriction endonuclease*; YkfI toxin protein*; YfjZ protein (antitoxin to YpjF)*; Type I restriction-modification system, DNA-methyltransferase subunit M*; Type I restriction-modification system, specificity subunit S*; RloF*; Type I restriction-modification system, restriction subunit R*; Putative predicted metal-dependent hydrolase*; Type I restriction-modification system, DNA-methylt…		Putative MGE
SRS2822480	4	73904		91513		Prophage integrase IntA; plasmid-related protein*; Tyrosine recombinase XerC; Transcriptional regulator*, AlpA like		Putative MGE
SRS2822480	5	66512		66652		Alpha-xylosidase
SRS2822480	6	134		2179		Intimin
SRS2822480	7	125002		125955		2-keto-3-deoxygluconate permease
SRS2822480	7	182477		183643		h.p.
SRS2822480	9	79782		80006		h.p.
SRS2822480	9	99100		99297		Putative membrane protein*
SRS2822480	13	158		87203		See Supplemental Figure 2		Plasmid
SRS2822480	18	5004		6047		Cytochrome c-type biogenesis protein CcmH
CLADE III
Isolate	Contig	Start		Stop		Annotation(s)		MGE Region
SRS3010019	1	39		620		Cytochrome c-type biogenesis protein CcmH
SRS3010019	1	25795		25941		h.p.
SRS3010019	1	106264		106698		h.p.
SRS3010019	1	246605		246709		Arginine/lysine/ornithine decarboxylase*
SRS3010019	1	639123		639776		h.p.
SRS3010019	1	727239		767712		Mobile element protein*; Mobile element protein*; DNA helicase II; Chromosome partition protein Smc- protein; Mobile element protein*; Transposase*; HTH-type transcriptional regulator SyrM 1; Long-chain fatty acid transport protein; corresponds to STY3950 from Accession AL513382: Salmonella typhi CT18*; Outer membrane protein/protective antigen OMA87*; Outer membrane protein assembly factor BamA;…		Putative MGE
SRS3010019	1	1082149		1118071		Uncharacterized protein RzpQ*; Lytic enzyme*; Putative prophage membrane protein*; Putative prophage membrane protein*; Nucleoid-associated protein YejK; Antitermination protein Q*; Uncharacterized protein, YdfU family*; Phage protein*; Crossover junction endodeoxyribonuclease RusA; DNA adenine methylase; h.p., PV83 orf 20 homolog [SA bacteriophages 11, Mu50B]*; rha protein*; Uncharacterized prot…		Prophage Region 3
SRS3010019	1	1225448		1226185		putative phosphatase YcdX
SRS3010019	2	50754		77584		Phage baseplate assembly protein*; DNA damage-inducible protein I; Phage replication protein*; DNA adenine methylase; Putative uncharacterized protein ORFD in retron EC67*; putative protein YbiI; corresponds to STY4639 from Accession AL513382: Salmonella typhi CT18*; Phage repressor protein cI*; Tyrosine recombinase XerH; Phage integrase, Phage P4-associated*; Prophage integrase IntA; Recombinase…		Prophage Region 6
SRS3010019	2	77581		100603		Nucleoid occlusion protein; orf; Other or unknown (Phage or Prophage Related)*; Putative DNA-binding protein*; Transcriptional regulator, Xre family*; Transporter, LysE family*		Putative MGE
SRS3010019	2	560052		571035		ATP-dependent Clp protease proteolytic subunit; Zinc binding domain / DNA primase, Phage P4-associated / Replicative helicase RepA, Phage P4-associated*; Phage integrase*		Putative MGE
SRS3010019	3	331513		355434		Prophage integrase IntS; Putative DNA-binding protein*; Tyrosine recombinase XerC; putative lipoprotein*; Prophage integrase IntA; Phage T7 exclusion protein*; Phage T7 exclusion protein associated h.p.*; 7-cyano-7-deazaguanine synthase; putative metal-dependent hydrolase YcfH		Putative MGE
SRS3010019	3	492689		492952		30S ribosomal protein S20
SRS3010019	4	39		620		Cytochrome c-type biogenesis protein CcmH
SRS3010019	4	190030		190365		Unknown substrate:proton symporter, NAT/NCS2 family*
SRS3010019	4	190329		190424		h.p.
SRS3010019	5	1595		7589		DNA damage-inducible protein I; Gifsy-2 prophage protein STM1020/STM2620*; Phage protein*; putative protein YlcG; Phage antitermination protein Q*; Lysozyme RrrD; Rz endopeptidase from lambdoid phage*; Inhibitor of g-type lysozyme		Putative MGE
SRS3010019	5	119382		120038		h.p.
SRS3010019	9	684		7579		Gifsy-1 prophage cI*; putative protein YdfB; host-nuclease inhibitor protein*; Phage integrase family protein*; phage-related exonuclease*; DNA adenine methylase; Tyrosine recombinase XerD		Prophage Region 8
SRS3010019	11	3722		27925		Phage holin*; Lytic enzyme*; Putative 8-oxo-dGTP diphosphatase 3; Phage protein*; Prophage tail fiber assembly protein TfaE		Putative MGE
SRS3010019	32	3		236		DNA damage-inducible protein I
SRS3643364	177	12		149		h.p.		Putative MGE
SRS3721796	3	470622		471176		h.p.		Putative MGE
SRS3721796	5	231826		232047		UPF0214 protein YfeW*
SRS3721796	9	204729		247594		Phage integrase*; Exodeoxyribonuclease 8; putative protein YdfB; Phage antitermination protein Q*; Lysozyme RrrD; Phage endopeptidase Rz*; Phage terminase, small subunit*; Phage terminase, large subunit*; ABC-type multidrug transport system, ATPase and permease components*; Phage protein*; Membrane-bound lytic murein transglycosylase D; phage P2 baseplate assembly protein gpV*; IS, phage, Tn, Tra…		Prophage Region 5
SRS3721796	14	75550		76125		h.p.
SRS3799118	1	1076		1198		Phage DNA invertase*		Putative MGE
SRS3799118	4	45		617		h.p.
SRS3799118	31	21		581		h.p.
*h.p.: hypothetical protein

## Sheet: Clade I
Scoary gene group	Gene	Non-unique Gene name	Annotation	No. pos. present in	No. neg. present in	No. pos. not present in	No. neg. not present in	Sensitivity	Specificity	Odds ratio	Naïve p	Bonferroni p	Benjamini H p	Max Pairwise comparisons	Max supporting pairs	Max opposing pairs	Best pairwise comp. p	Worst pairwise comp. p	Empirical p
1	group_1383--group_743--malS_1--group_1381--group_1382--group_417	----------	hypothetical protein--hypothetical protein--Periplasmic alpha-amylase--hypothetical protein--hypothetical protein--hypothetical protein	54	0	0	57	100	100	inf	5.30666e-33	3.83141e-30	6.38568e-31	3	3	0	0.25	0.25	0.53125
2	group_744		hypothetical protein	54	1	0	56	100	98.2456	inf	2.91866e-31	2.10727e-28	3.01039e-29	3	3	0	0.25	0.25	0.4375
3	group_746--traC--group_162	----	hypothetical protein--DNA primase TraC--hypothetical protein	54	2	0	55	100	96.4912	inf	8.46412e-30	6.11109e-27	5.46295e-28	3	3	0	0.25	0.25	0.21875
4	group_389--group_750--group_734--intQ--group_96	--------	hypothetical protein--hypothetical protein--hypothetical protein--Putative defective protein IntQ--hypothetical protein	54	3	0	54	100	94.7368	inf	1.71612e-28	1.23904e-25	6.52125e-27	3	3	0	0.25	0.25	0.375
5	group_416--group_1384	intA_1--	Prophage integrase IntA--hypothetical protein	54	3	0	54	100	94.7368	inf	1.71612e-28	1.23904e-25	6.52125e-27	3	3	0	0.25	0.25	0.25
6	group_159		hypothetical protein	54	4	0	53	100	92.9825	inf	2.71667e-27	1.96144e-24	6.76358e-26	3	3	0	0.25	0.25	0.28125
7	group_335		hypothetical protein	54	4	0	53	100	92.9825	inf	2.71667e-27	1.96144e-24	6.76358e-26	3	3	0	0.25	0.25	0.375
8	group_420		hypothetical protein	54	4	0	53	100	92.9825	inf	2.71667e-27	1.96144e-24	6.76358e-26	3	3	0	0.25	0.25	0.3125
9	group_741		hypothetical protein	54	4	0	53	100	92.9825	inf	2.71667e-27	1.96144e-24	6.76358e-26	3	3	0	0.25	0.25	0.28125
10	group_731		hypothetical protein	54	8	0	49	100	85.9649	inf	3.39617e-23	2.45203e-20	4.37765e-22	2	2	0	0.5	0.5	0.53125
11	recE_2		Exodeoxyribonuclease 8	54	8	0	49	100	85.9649	inf	3.39617e-23	2.45203e-20	4.37765e-22	3	3	0	0.25	0.25	0.0693069
12	group_1387--group_1386	--	hypothetical protein--hypothetical protein	54	9	0	48	100	84.2105	inf	1.25957e-22	9.09409e-20	9.27968e-22	1	1	0	1	1	1
13	group_1372--group_1371	--	hypothetical protein--hypothetical protein	54	10	0	47	100	82.4561	inf	8.07113e-22	5.82736e-19	4.58847e-21	1	1	0	1	1	1
14	bsdD		Phenolic acid decarboxylase subunit D	54	11	0	46	100	80.7018	inf	4.77661e-21	3.44871e-18	2.48109e-20	1	1	0	1	1	0.53125
15	sadA_1		Autotransporter adhesin SadA	54	15	0	42	100	73.6842	inf	3.055e-18	2.20571e-15	1.23916e-17	3	3	0	0.25	0.25	0.00990099
16	ldrD		Small toxic polypeptide LdrD	54	31	0	26	100	45.614	inf	9.08548e-10	6.55972e-07	2.39406e-09	1	1	0	1	1	0.00990099
17	ccmA		Cytochrome c biogenesis ATP-binding export protein CcmA	54	38	0	19	100	33.3333	inf	7.04317e-07	0.000508517	1.77184e-06	3	3	0	0.25	0.25	0.00990099
18	group_43		hypothetical protein	54	41	0	16	100	28.0702	inf	9.68478e-06	0.00699241	2.21279e-05	3	3	0	0.25	0.25	0.00990099
19	group_160		hypothetical protein	53	2	1	55	98.1481	96.4912	1457.5	4.49766e-28	3.24731e-25	1.46038e-26	3	3	1	0.25	1	0.205882
20	group_736		hypothetical protein	53	7	1	50	98.1481	87.7193	378.571	1.41873e-22	1.02432e-19	1.03467e-21	3	3	1	0.25	1	0.0990099
21	group_1398--dnaT_2	--	hypothetical protein--Primosomal protein 1	53	18	1	39	98.1481	68.4211	114.833	6.84639e-15	4.94309e-12	2.39956e-14	3	3	0	0.25	0.25	0.171429
22	group_422--group_421--cph2--group_1397--yjcS--group_755	----------	hypothetical protein--hypothetical protein--Phytochrome-like protein cph2--hypothetical protein--Putative alkyl/aryl-sulfatase YjcS--hypothetical protein	53	19	1	38	98.1481	66.6667	106	2.54483e-14	1.83737e-11	8.12994e-14	3	3	0	0.25	0.25	0.108911
23	group_1348--group_378	"--fruA_3"	hypothetical protein--PTS system fructose-specific EIIB'BC component	52	0	2	57	96.2963	100	inf	9.07969e-30	6.55554e-27	5.46295e-28	2	2	0	0.5	0.5	0.71875
24	group_772		hypothetical protein	52	4	2	53	96.2963	92.9825	344.5	3.11733e-24	2.25071e-21	4.87064e-23	3	2	1	1	1	0.5625
25	group_1		hypothetical protein	52	36	2	21	96.2963	36.8421	15.1667	1.12094e-05	0.00809318	2.55305e-05	3	3	2	0.25	1	0.00990099
26	group_7882		hypothetical protein	51	0	3	57	94.4444	100	inf	1.81594e-28	1.31111e-25	6.55554e-27	3	3	0	0.25	0.25	0.108911
27	group_1395		hypothetical protein	51	2	3	55	94.4444	96.4912	467.5	2.28353e-25	1.64871e-22	4.7106e-24	3	2	1	1	1	0.65625
28	group_771		hypothetical protein	51	8	3	49	94.4444	85.9649	104.125	3.27794e-19	2.36667e-16	1.4004e-18	3	2	2	1	1	0.28125
29	group_403		hypothetical protein	51	14	3	43	94.4444	75.4386	52.2143	8.56548e-15	6.18428e-12	2.8499e-14	3	2	2	1	1	0.21875
30	group_407--group_718--rusA--group_787	------	hypothetical protein--hypothetical protein--Crossover junction endodeoxyribonuclease RusA--hypothetical protein	50	1	4	56	92.5926	98.2456	700	1.32155e-25	9.54158e-23	2.80635e-24	3	3	1	0.25	1	0.029703
31	group_1879--group_443	--	hypothetical protein--hypothetical protein	50	2	4	55	92.5926	96.4912	343.75	3.2381e-24	2.33791e-21	4.87064e-23	3	3	2	0.25	1	0.049505
32	group_235		hypothetical protein	48	10	6	47	88.8889	82.4561	37.6	8.12724e-15	5.86787e-12	2.76786e-14	3	3	2	0.25	1	0.00990099
33	group_228		hypothetical protein	48	15	6	42	88.8889	73.6842	22.4	1.25739e-11	9.07832e-09	3.76694e-11	3	3	1	0.25	1	0.00990099
34	group_742--group_1380	--	hypothetical protein--hypothetical protein	46	1	8	56	85.1852	98.2456	322	1.91106e-21	1.37978e-18	1.0696e-20	2	1	1	1	1	0.96875
35	group_412		hypothetical protein	46	2	8	55	85.1852	96.4912	158.125	2.34497e-20	1.69307e-17	1.13629e-19	3	1	2	1	1	0.8125
36	group_1370--group_1368--group_1369--intA_3	------	hypothetical protein--hypothetical protein--hypothetical protein--Prophage integrase IntA	43	0	11	57	79.6296	100	inf	8.13541e-21	5.87377e-18	4.05087e-20	1	1	0	1	1	0.5
37	group_730		hypothetical protein	42	0	12	57	77.7778	100	inf	4.67786e-20	3.37742e-17	2.19313e-19	1	1	0	1	1	0.59375
38	group_409		hypothetical protein	41	0	13	57	75.9259	100	inf	2.51885e-19	1.81861e-16	1.08251e-18	1	1	0	1	1	0.3125
39	mobA_2		Mobilization protein A	41	0	13	57	75.9259	100	inf	2.51885e-19	1.81861e-16	1.08251e-18	1	1	0	1	1	0.195122
40	group_824		hypothetical protein	40	0	14	57	74.0741	100	inf	1.27742e-18	9.22295e-16	5.24031e-18	3	3	0	0.25	0.25	0.00990099
41	group_410		hypothetical protein	39	0	15	57	72.2222	100	inf	6.1316e-18	4.42701e-15	2.44586e-17	1	1	0	1	1	0.212121
42	group_1363		hypothetical protein	38	0	16	57	70.3704	100	inf	2.79754e-17	2.01982e-14	1.07437e-16	1	1	0	1	1	0.029703
43	group_1364		hypothetical protein	37	0	17	57	68.5185	100	inf	1.21775e-16	8.79218e-14	4.62746e-16	1	1	0	1	1	0.019802
44	group_729		hypothetical protein	36	1	18	56	66.6667	98.2456	112	1.75154e-14	1.26461e-11	5.74822e-14	2	2	1	0.5	1	0.029703
45	group_158		hypothetical protein	35	2	19	55	64.8148	96.4912	50.6579	1.07185e-12	7.73873e-10	3.25157e-12	3	2	2	1	1	0.4375
46	dinI_4		DNA damage-inducible protein I	35	57	19	0	64.8148	0	0	1.57619e-07	0.000113801	4.00709e-07	1	0	1	1	1	0.00990099
47	group_1352--group_1351--group_1350--group_1349	dinI_3------	DNA damage-inducible protein I--hypothetical protein--hypothetical protein--hypothetical protein	34	0	20	57	62.963	100	inf	7.81392e-15	5.64165e-12	2.67377e-14	1	1	0	1	1	0.019802
48	group_1353--group_1358--group_1354--group_1355--group_1360--group_1356--group_1357--group_1359--group_1361	dam_2----ybiI_2----xerH--------	DNA adenine methylase--hypothetical protein--putative protein YbiI--hypothetical protein--Tyrosine recombinase XerH--hypothetical protein--hypothetical protein--hypothetical protein--hypothetical protein	33	1	21	56	61.1111	98.2456	88	8.58026e-13	6.19495e-10	2.6139e-12	2	1	1	1	1	0.71875
49	group_1365		hypothetical protein	32	0	22	57	59.2593	100	inf	1.04219e-13	7.52464e-11	3.31482e-13	1	1	0	1	1	0.019802
50	group_1366		hypothetical protein	29	0	25	57	53.7037	100	inf	4.0129e-12	2.89731e-09	1.21227e-11	1	1	0	1	1	0.00990099
51	ycdX		putative phosphatase YcdX	29	56	25	1	53.7037	1.75439	0.0207143	7.09141e-09	5.12e-06	1.82206e-08	2	1	1	1	1	0.6875
52	group_246	ycdX	putative phosphatase YcdX	26	1	28	56	48.1481	98.2456	52	2.51766e-09	1.81775e-06	6.56228e-09	2	1	1	1	1	0.78125
53	group_90		hypothetical protein	24	0	30	57	44.4444	100	inf	1.04049e-09	7.51234e-07	2.73176e-09	1	1	0	1	1	0.019802
54	group_88	icsA_2	hypothetical protein	23	3	31	54	42.5926	94.7368	13.3548	2.92727e-06	0.00211349	7.23798e-06	3	2	3	0.25	1	0.00990099
55	ccmH_3		Cytochrome c-type biogenesis protein CcmH	23	47	31	10	42.5926	17.5439	0.157859	1.4486e-05	0.0104589	3.28897e-05	3	1	3	0.25	1	0.00990099
56	group_2391		hypothetical protein	18	0	36	57	33.3333	100	inf	4.07184e-07	0.000293987	1.02792e-06	3	3	0	0.25	0.25	0.00990099
57	group_226		hypothetical protein	14	0	40	57	25.9259	100	inf	1.54374e-05	0.0111458	3.49399e-05	2	2	0	0.5	0.5	0.019802
58	xerH		Tyrosine recombinase XerH	13	44	41	13	24.0741	22.807	0.0936807	2.00252e-08	1.44582e-05	5.1089e-08	3	2	2	1	1	0.625
59	group_1111		hypothetical protein	12	44	42	13	22.2222	22.807	0.0844156	5.96253e-09	4.30495e-06	1.54854e-08	2	2	2	0.5	0.5	0.029703
60	dinI_3		DNA damage-inducible protein I	12	45	42	12	22.2222	21.0526	0.0761905	1.71882e-09	1.24099e-06	4.49634e-09	3	2	3	0.25	1	0.029703
61	group_1009		hypothetical protein	8	54	46	3	14.8148	5.26316	0.00966184	3.38948e-19	2.4472e-16	1.43953e-18	1	1	1	1	1	0.194444
62	group_431		hypothetical protein	7	30	47	27	12.963	47.3684	0.134043	8.38873e-06	0.00605666	1.96008e-05	2	1	2	0.5	1	0.5625
63	group_539--group_1073	--	hypothetical protein--hypothetical protein	7	48	47	9	12.963	15.7895	0.0279255	9.91521e-15	7.15878e-12	3.26885e-14	2	1	2	0.5	1	0.039604
64	group_237		hypothetical protein	4	47	50	10	7.40741	17.5439	0.0170213	1.34046e-16	9.67814e-14	5.06709e-16	1	1	1	1	1	0.0792079
65	group_1075		putative HTH-type transcriptional regulator	4	48	50	9	7.40741	15.7895	0.015	2.30853e-17	1.66676e-14	8.91313e-17	2	1	2	0.5	1	0.0693069
66	group_129		hypothetical protein	4	48	50	9	7.40741	15.7895	0.015	2.30853e-17	1.66676e-14	8.91313e-17	2	1	2	0.5	1	0.029703
67	group_540		hypothetical protein	4	49	50	8	7.40741	14.0351	0.0130612	3.63978e-18	2.62792e-15	1.46811e-17	3	1	3	0.25	1	0.049505
68	group_475		hypothetical protein	4	56	50	1	7.40741	1.75439	0.00142857	1.32155e-25	9.54158e-23	2.80635e-24	3	1	3	0.25	1	0.00990099
69	group_1110--group_136--group_1104--group_2373	------	hypothetical protein--hypothetical protein--hypothetical protein--hypothetical protein	3	43	51	14	5.55556	24.5614	0.0191518	8.56548e-15	6.18428e-12	2.8499e-14	2	2	1	0.5	1	0.039604
70	group_1113--dam_2--ybiI_2--group_1118--group_1114--group_1116--group_596--group_1117--group_1115	----------------	hypothetical protein--DNA adenine methylase--putative protein YbiI--hypothetical protein--hypothetical protein--hypothetical protein--hypothetical protein--hypothetical protein--hypothetical protein	3	44	51	13	5.55556	22.807	0.0173797	1.86644e-15	1.34757e-12	6.60574e-15	3	2	2	1	1	0.40625
71	group_1074		hypothetical protein	3	47	51	10	5.55556	17.5439	0.0125156	1.31376e-17	9.48532e-15	5.21172e-17	2	1	2	0.5	1	0.0594059
72	group_658--rrrD_2	--	hypothetical protein--Lysozyme RrrD	3	51	51	6	5.55556	10.5263	0.00692042	5.47518e-21	3.95308e-18	2.8036e-20	3	2	2	1	1	0.375
73	pliG		Inhibitor of g-type lysozyme	3	52	51	5	5.55556	8.77193	0.00565611	5.85082e-22	4.22429e-19	4.02314e-21	3	2	2	1	1	0.6875
74	group_700		hypothetical protein	3	53	51	4	5.55556	7.01754	0.00443951	5.32867e-23	3.8473e-20	6.30705e-22	3	1	2	1	1	0.59375
75	group_701		hypothetical protein	3	53	51	4	5.55556	7.01754	0.00443951	5.32867e-23	3.8473e-20	6.30705e-22	3	1	2	1	1	0.75
76	group_1250		hypothetical protein	3	54	51	3	5.55556	5.26316	0.00326797	3.97687e-24	2.8713e-21	5.52173e-23	3	2	2	1	1	0.3125
77	group_1392		hypothetical protein	2	19	52	38	3.7037	66.6667	0.0769231	5.55841e-05	0.0401317	0.000119085	3	2	2	1	1	0.5
78	group_37		hypothetical protein	2	23	52	34	3.7037	59.6491	0.0568562	2.09523e-06	0.00151275	5.19847e-06	3	1	2	1	1	0.46875
79	group_838		hypothetical protein	2	35	52	22	3.7037	38.5965	0.0241758	1.39671e-11	1.00843e-08	4.13289e-11	3	1	2	1	1	0.53125
80	dinI_5		DNA damage-inducible protein I	2	41	52	16	3.7037	28.0702	0.0150094	7.29592e-15	5.26765e-12	2.54476e-14	2	2	1	0.5	1	0.029703
81	group_705--group_1295	--	hypothetical protein--hypothetical protein	2	44	52	13	3.7037	22.807	0.0113636	1.64272e-16	1.18605e-13	6.14531e-16	2	1	1	1	1	0.96875
82	group_706		hypothetical protein	2	46	52	11	3.7037	19.2982	0.00919732	5.91438e-18	4.27018e-15	2.37232e-17	2	1	1	1	1	0.90625
83	group_1069--group_1070--group_538	rusA--dam_1--	Crossover junction endodeoxyribonuclease RusA--DNA adenine methylase--hypothetical protein	2	47	52	10	3.7037	17.5439	0.00818331	1.00993e-18	7.29172e-16	4.1667e-18	1	1	1	1	1	0.21875
84	group_119		hypothetical protein	2	48	52	9	3.7037	15.7895	0.00721154	1.59256e-19	1.14983e-16	6.92667e-19	2	1	1	1	1	1
85	group_381		hypothetical protein	2	49	52	8	3.7037	14.0351	0.00627943	2.29861e-20	1.6596e-17	1.12135e-19	2	1	2	0.5	1	0.21875
86	group_382		hypothetical protein	2	50	52	7	3.7037	12.2807	0.00538462	3.00335e-21	2.16842e-18	1.66801e-20	3	1	2	1	1	0.6875
87	group_120		hypothetical protein	2	51	52	6	3.7037	10.5263	0.00452489	3.50239e-22	2.52872e-19	2.43146e-21	3	1	2	1	1	0.5625
88	group_393--group_1294--group_704--group_1292	------	hypothetical protein--hypothetical protein--hypothetical protein--hypothetical protein	2	51	52	6	3.7037	10.5263	0.00452489	3.50239e-22	2.52872e-19	2.43146e-21	3	1	2	1	1	0.5625
89	group_1291--group_392	--	hypothetical protein--hypothetical protein	2	52	52	5	3.7037	8.77193	0.00369822	3.5773e-23	2.58281e-20	4.37765e-22	3	1	2	1	1	0.90625
90	group_394		hypothetical protein	2	52	52	5	3.7037	8.77193	0.00369822	3.5773e-23	2.58281e-20	4.37765e-22	3	1	2	1	1	0.75
91	mutT3--group_703--group_1296--group_391--group_1290--group_702--group_1298	------------	Putative 8-oxo-dGTP diphosphatase 3--hypothetical protein--hypothetical protein--hypothetical protein--hypothetical protein--hypothetical protein--hypothetical protein	2	53	52	4	3.7037	7.01754	0.00290276	3.11733e-24	2.25071e-21	4.87064e-23	3	1	2	1	1	0.78125
92	group_146		hypothetical protein	2	56	52	1	3.7037	1.75439	0.000686813	4.65219e-28	3.35888e-25	1.46038e-26	2	0	2	0.5	0.5	0.28125
93	group_7880		hypothetical protein	2	56	52	1	3.7037	1.75439	0.000686813	4.65219e-28	3.35888e-25	1.46038e-26	2	1	2	0.5	1	0.6875
94	group_1273		hypothetical protein	1	17	53	40	1.85185	70.1754	0.0443951	4.4681e-05	0.0322597	9.60109e-05	3	1	3	0.25	1	0.00990099
95	group_1394--ydfB_1	--	hypothetical protein--putative protein YdfB	1	17	53	40	1.85185	70.1754	0.0443951	4.4681e-05	0.0322597	9.60109e-05	1	1	1	1	1	0.28125
96	group_32--group_2002	--	hypothetical protein--hypothetical protein	1	17	53	40	1.85185	70.1754	0.0443951	4.4681e-05	0.0322597	9.60109e-05	2	1	1	1	1	0.75
97	group_352	flp	hypothetical protein	1	17	53	40	1.85185	70.1754	0.0443951	4.4681e-05	0.0322597	9.60109e-05	1	1	1	1	1	0.28125
98	group_2011--group_834--group_2012--group_832--group_2016--group_835--group_2013--group_833	--------------	hypothetical protein--hypothetical protein--hypothetical protein--hypothetical protein--hypothetical protein--hypothetical protein--hypothetical protein--hypothetical protein	1	18	53	39	1.85185	68.4211	0.0408805	1.98284e-05	0.0143161	4.37801e-05	3	1	2	1	1	0.65625
99	group_836--group_2019--group_2022--group_837--group_2021--group_445--group_2017--group_2024--mltD_1--group_2020--group_2023	--------------------	hypothetical protein--hypothetical protein--hypothetical protein--hypothetical protein--hypothetical protein--hypothetical protein--hypothetical protein--hypothetical protein--Membrane-bound lytic murein transglycosylase D--hypothetical protein--hypothetical protein	1	20	53	37	1.85185	64.9123	0.0349057	3.71691e-06	0.00268361	8.8568e-06	3	1	2	1	1	0.5625
100	group_236		hypothetical protein	1	26	53	31	1.85185	54.386	0.0224964	1.60266e-08	1.15712e-05	4.10328e-08	1	1	1	1	1	0.019802
101	group_1026--group_1025	--	hypothetical protein--hypothetical protein	1	27	53	30	1.85185	52.6316	0.0209644	6.04273e-09	4.36285e-06	1.55816e-08	1	1	1	1	1	0.375
102	group_405		hypothetical protein	1	29	53	28	1.85185	49.1228	0.0182173	8.05238e-10	5.81382e-07	2.16127e-09	1	1	1	1	1	0.00990099
103	group_1072--group_1065--group_537--group_1067--group_536--yejK_1--group_1066--group_1064--group_1071	----------------	hypothetical protein--hypothetical protein--hypothetical protein--hypothetical protein--hypothetical protein--Nucleoid-associated protein YejK--hypothetical protein--hypothetical protein--hypothetical protein	1	47	53	10	1.85185	17.5439	0.00401445	5.60042e-20	4.04351e-17	2.46555e-19	1	1	1	1	1	0.34375
104	group_348		hypothetical protein	1	47	53	10	1.85185	17.5439	0.00401445	5.60042e-20	4.04351e-17	2.46555e-19	2	1	2	0.5	1	0.0594059
105	group_205	pnbA	hypothetical protein	1	48	53	9	1.85185	15.7895	0.00353774	8.37812e-21	6.04901e-18	4.11497e-20	1	1	1	1	1	0.59375
106	group_535		hypothetical protein	1	48	53	9	1.85185	15.7895	0.00353774	8.37812e-21	6.04901e-18	4.11497e-20	2	1	2	0.5	1	0.34375
107	group_191		hypothetical protein	0	15	54	42	0	73.6842	0	2.25913e-05	0.016311	4.94271e-05	1	0	1	1	1	0.00990099
108	group_2010--group_2009	--	putative protein--hypothetical protein	0	15	54	42	0	73.6842	0	2.25913e-05	0.016311	4.94271e-05	1	0	1	1	1	0.194444
109	group_1246		hypothetical protein	0	16	54	41	0	71.9298	0	9.68478e-06	0.00699241	2.21279e-05	3	0	3	0.25	0.25	0.019802
110	group_2007--rrrD_1--group_2008--group_2004--group_2005	--------	hypothetical protein--Lysozyme RrrD--hypothetical protein--hypothetical protein--hypothetical protein	0	16	54	41	0	71.9298	0	9.68478e-06	0.00699241	2.21279e-05	1	0	1	1	1	0.25
111	group_2001--cotSA_1--group_2026--group_2000--group_2025	recE_2--------tfaE_2	Exodeoxyribonuclease 8--Spore coat protein SA--hypothetical protein--hypothetical protein--Prophage tail fiber assembly protein TfaE	0	17	54	40	0	70.1754	0	4.09808e-06	0.00295881	9.60653e-06	1	0	1	1	1	0.4375
112	group_1999		hypothetical protein	0	18	54	39	0	68.4211	0	1.71085e-06	0.00123523	4.25942e-06	1	0	1	1	1	0.53125
113	group_2015--group_2014	--	hypothetical protein--hypothetical protein	0	18	54	39	0	68.4211	0	1.71085e-06	0.00123523	4.25942e-06	2	0	2	0.5	0.5	0.3125
114	group_2028		hypothetical protein	0	20	54	37	0	64.9123	0	2.85774e-07	0.000206329	7.23961e-07	3	0	3	0.25	0.25	0.00990099
115	group_1045--group_1046	--	hypothetical protein--hypothetical protein	0	26	54	31	0	54.386	0	9.08548e-10	6.55972e-07	2.39406e-09	1	0	1	1	1	0.4375
116	group_1048--group_1047	--	hypothetical protein--hypothetical protein	0	26	54	31	0	54.386	0	9.08548e-10	6.55972e-07	2.39406e-09	1	0	1	1	1	0.3125
117	smc--group_1029--ziaA--bmaC--hflK_1--group_1040--group_1021--group_1028--group_1033--group_521--group_1039--group_1027--group_1031--group_1034--hflC_1--uvrD_1--group_1024--bamA_1--group_1038--group_1044--syrM1--fadL_1--group_524--group_1035	--------------------yjcS--------------------------	Chromosome partition protein Smc--hypothetical protein--Zinc-transporting ATPase--Adhesin BmaC autotransporter--Modulator of FtsH protease HflK--hypothetical protein--hypothetical protein--hypothetical protein--hypothetical protein--hypothetical protein--Putative alkyl/aryl-sulfatase YjcS--hypothetical protein--hypothetical protein--hypothetical protein--Modulator of FtsH protease HflC--DNA helic…	0	27	54	30	0	52.6316	0	3.27083e-10	2.36154e-07	8.8117e-10	1	0	1	1	1	0.6875
118	group_1213		hypothetical protein	0	30	54	27	0	47.3684	0	1.34621e-11	9.71962e-09	3.99984e-11	1	0	1	1	1	0.00990099
119	group_1274		hypothetical protein	0	30	54	27	0	47.3684	0	1.34621e-11	9.71962e-09	3.99984e-11	1	0	1	1	1	0.00990099
120	group_630		hypothetical protein	0	31	54	26	0	45.614	0	4.44205e-12	3.20716e-09	1.33632e-11	1	0	1	1	1	0.019802
121	group_1501		hypothetical protein	0	33	54	24	0	42.1053	0	4.48597e-13	3.23887e-10	1.42056e-12	3	0	3	0.25	0.25	0.00990099
122	group_600		hypothetical protein	0	39	54	18	0	31.5789	0	2.25997e-16	1.6317e-13	8.3677e-16	1	0	1	1	1	0.019802
123	spo0C		Chromosome-partitioning protein Spo0J	0	39	54	18	0	31.5789	0	2.25997e-16	1.6317e-13	8.3677e-16	1	0	1	1	1	0.039604
124	group_1221		hypothetical protein	0	40	54	17	0	29.8246	0	5.62439e-17	4.06081e-14	2.14858e-16	1	0	1	1	1	0.019802
125	group_1132		hypothetical protein	0	41	54	16	0	28.0702	0	1.34129e-17	9.68409e-15	5.23464e-17	1	0	1	1	1	0.029703
126	group_1136		hypothetical protein	0	41	54	16	0	28.0702	0	1.34129e-17	9.68409e-15	5.23464e-17	1	0	1	1	1	0.029703
127	group_117		hypothetical protein	0	41	54	16	0	28.0702	0	1.34129e-17	9.68409e-15	5.23464e-17	1	0	1	1	1	0.019802
128	group_1220		hypothetical protein	0	42	54	15	0	26.3158	0	3.055e-18	2.20571e-15	1.23916e-17	1	0	1	1	1	0.0792079
129	group_1133		hypothetical protein	0	43	54	14	0	24.5614	0	6.62097e-19	4.78034e-16	2.77927e-18	1	0	1	1	1	0.049505
130	group_234		hypothetical protein	0	43	54	14	0	24.5614	0	6.62097e-19	4.78034e-16	2.77927e-18	1	0	1	1	1	0.019802
131	group_1216		hypothetical protein	0	44	54	13	0	22.807	0	1.35955e-19	9.81597e-17	5.94907e-19	1	0	1	1	1	0.188679
132	group_1212		hypothetical protein	0	45	54	12	0	21.0526	0	2.63205e-20	1.90034e-17	1.24205e-19	1	0	1	1	1	0.3125
133	group_603		hypothetical protein	0	45	54	12	0	21.0526	0	2.63205e-20	1.90034e-17	1.24205e-19	1	0	1	1	1	0.2
134	noc		Nucleoid occlusion protein	0	45	54	12	0	21.0526	0	2.63205e-20	1.90034e-17	1.24205e-19	1	0	1	1	1	0.0990099
135	ycfH_2		putative metal-dependent hydrolase YcfH	0	45	54	12	0	21.0526	0	2.63205e-20	1.90034e-17	1.24205e-19	1	0	1	1	1	0.128713
136	group_1123		hypothetical protein	0	46	54	11	0	19.2982	0	4.77661e-21	3.44871e-18	2.48109e-20	1	0	1	1	1	0.28125
137	group_1127--group_1126--group_1128	----	hypothetical protein--hypothetical protein--hypothetical protein	0	46	54	11	0	19.2982	0	4.77661e-21	3.44871e-18	2.48109e-20	1	0	1	1	1	0.34375
138	group_1239		hypothetical protein	0	46	54	11	0	19.2982	0	4.77661e-21	3.44871e-18	2.48109e-20	1	0	1	1	1	0.6875
139	group_1293		hypothetical protein	0	46	54	11	0	19.2982	0	4.77661e-21	3.44871e-18	2.48109e-20	1	0	1	1	1	0.5
140	group_145		hypothetical protein	0	46	54	11	0	19.2982	0	4.77661e-21	3.44871e-18	2.48109e-20	1	0	1	1	1	0.4375
141	group_273		hypothetical protein	0	46	54	11	0	19.2982	0	4.77661e-21	3.44871e-18	2.48109e-20	1	0	1	1	1	0.21875
142	group_1129--group_1125--intA_2--group_1135--group_1134--group_1140--group_1139--group_1119--group_3542--group_1122--group_1137--group_602--group_1138--group_1130--group_1124--group_601--group_1131	--------------------------------	hypothetical protein--hypothetical protein--Prophage integrase IntA--hypothetical protein--hypothetical protein--hypothetical protein--hypothetical protein--hypothetical protein--hypothetical protein--hypothetical protein--hypothetical protein--hypothetical protein--hypothetical protein--hypothetical protein--hypothetical protein--hypothetical protein--hypothetical protein	0	47	54	10	0	17.5439	0	8.07113e-22	5.82736e-19	4.58847e-21	1	0	1	1	1	0.5625
143	group_1215		hypothetical protein	0	47	54	10	0	17.5439	0	8.07113e-22	5.82736e-19	4.58847e-21	1	0	1	1	1	0.5625
144	group_1227		hypothetical protein	0	47	54	10	0	17.5439	0	8.07113e-22	5.82736e-19	4.58847e-21	1	0	1	1	1	1
145	xerC_1		Tyrosine recombinase XerC	0	47	54	10	0	17.5439	0	8.07113e-22	5.82736e-19	4.58847e-21	1	0	1	1	1	0.625
146	dam_4		DNA adenine methylase	0	48	54	9	0	15.7895	0	1.25957e-22	9.09409e-20	9.27968e-22	2	0	2	0.5	0.5	0.25
147	ydfB--group_1217--group_1299--group_1223--group_1229--group_1158--group_1151--group_1218--group_300--group_1289--group_615--group_1224--group_1222--group_1149--group_631--group_1157--group_1147--group_1278--group_1275--group_1155--group_1153--group_1156--group_1152--group_1226--group_1154--group_1277--group_1214--group_1146--group_1225--clpP_2--intS_4--queC_2--group_1219--group_1148	----tfaE_3--------------------intA_4------------------------------------------	putative protein YdfB--hypothetical protein--Prophage tail fiber assembly protein TfaE--hypothetical protein--hypothetical protein--hypothetical protein--hypothetical protein--hypothetical protein--hypothetical protein--hypothetical protein--hypothetical protein--hypothetical protein--Prophage integrase IntA--hypothetical protein--hypothetical protein--hypothetical protein--hypothetical protein--…	0	48	54	9	0	15.7895	0	1.25957e-22	9.09409e-20	9.27968e-22	1	0	1	1	1	1
148	group_1279--group_1280	--	hypothetical protein--hypothetical protein	0	49	54	8	0	14.0351	0	3.39617e-23	2.45203e-20	4.37765e-22	2	0	2	0.5	0.5	0.46875
149	group_1281--xerD_3--group_94	----	hypothetical protein--Tyrosine recombinase XerD--hypothetical protein	0	50	54	7	0	12.2807	0	3.89641e-24	2.81321e-21	5.5161e-23	3	0	3	0.25	0.25	0.3125
150	dnaJ_2--ylcG_2	--	hypothetical protein--putative protein YlcG	0	51	54	6	0	10.5263	0	3.97827e-25	2.87231e-22	7.55871e-24	3	0	3	0.25	0.25	0.625
151	group_301		hypothetical protein	0	51	54	6	0	10.5263	0	3.97827e-25	2.87231e-22	7.55871e-24	2	0	2	0.5	0.5	0.875
152	group_1297		hypothetical protein	0	53	54	4	0	7.01754	0	2.71667e-27	1.96144e-24	6.76358e-26	3	0	3	0.25	0.25	0.40625
153	group_390		hypothetical protein	0	53	54	4	0	7.01754	0	2.71667e-27	1.96144e-24	6.76358e-26	3	0	3	0.25	0.25	0.625

## Sheet: Clade I - Detailed Summary
Scoary Gene Group	Gene	Gene name	Isolate	Prokka Annotation					RASTtk Annotation					MGE Region
				Contig	Start	Stop	Strand	Product	Contig	Start	Stop	Strand	Function
31	group_443		SRS2420927	1	105099	105518	+	hypothetical protein	1	105099	105518	+	hypothetical protein
11	recE_2		SRS2420927	1	420332	421603	-	Exodeoxyribonuclease 8	1	421438	420332	-	hypothetical protein	Prophage Region 2
23	group_1348		SRS2420927	1	699132	699236	+	hypothetical protein	1	699132	699236	+	hypothetical protein
47	group_1349		SRS2420927	2	50693	52459	-	hypothetical protein	2	52459	50693	-	hypothetical protein	Prophage Region 4
47	group_1350		SRS2420927	2	53054	53962	-	hypothetical protein	2	53962	53054	-	Phage baseplate assembly protein
47	group_1351		SRS2420927	2	64078	64809	-	hypothetical protein	2	64809	64078	-	Phage protein
47	group_1352	dinI_3	SRS2420927	2	64869	65102	-	DNA damage-inducible protein I	2	65102	64869	-	hypothetical protein
44	group_729		SRS2420927	2	65113	65301	-	hypothetical protein	2	65301	65113	-	Phage protein
45	group_158		SRS2420927	2	65454	67883	-	hypothetical protein	2	67883	65454	-	Phage replication protein
48	group_1353	dam_2	SRS2420927	2	67874	68731	-	DNA adenine methylase	2	68731	67874	-	Methyl-directed repair DNA adenine methylase (EC 2.1.1.72)
48	group_1354	ybiI_2	SRS2420927	2	68728	68955	-	putative protein YbiI	2	68955	68728	-	Hypothetical Zinc-finger containing protein
48	group_1355		SRS2420927	2	68955	69182	-	hypothetical protein	2	69182	68955	-	corresponds to STY3665 from Accession AL513382: Salmonella typhi CT18
48	group_1356		SRS2420927	2	69250	69591	-	hypothetical protein	2	69591	69250	-	hypothetical protein
48	group_1357		SRS2420927	2	69555	69749	-	hypothetical protein	2	69749	69555	-	hypothetical protein
48	group_1358		SRS2420927	2	69834	70109	+	hypothetical protein	2	69834	70109	+	hypothetical protein
48	group_1359		SRS2420927	2	71106	71738	+	hypothetical protein	2	71106	71738	+	Phage repressor protein cI
48	group_1360	xerH	SRS2420927	2	71740	72765	+	Tyrosine recombinase XerH	2	71740	72765	+	Phage integrase
48	group_1361		SRS2420927	2	72762	73973	+	hypothetical protein	2	72762	73973	+	Phage protein
36	intA_3		SRS2420927	2	74299	75519	+	Prophage integrase IntA	2	74299	75519	+	Prophage CP4-57 integrase
38	group_409		SRS2420927	2	75602	77341	+	hypothetical protein	2	75602	77341	+	hypothetical protein
41	group_410		SRS2420927	2	77543	78007	-	hypothetical protein	2	78007	77543	-	hypothetical protein
42	group_1363		SRS2420927	2	78009	78245	-	hypothetical protein	2	78245	78009	-	hypothetical protein
43	group_1364		SRS2420927	2	78242	78652	-	hypothetical protein	2	78652	78242	-	hypothetical protein
37	group_730		SRS2420927	2	78645	78995	-	hypothetical protein	2	78995	78645	-	hypothetical protein
49	group_1365		SRS2420927	2	78985	79320	-	hypothetical protein	2	79320	78985	-	hypothetical protein
50	group_1366		SRS2420927	2	79317	79502	-	hypothetical protein	2	79502	79317	-	hypothetical protein
39	mobA_2		SRS2420927	2	79843	81153	+	Mobilization protein A	2	79843	81153	+	Mobilization protein MobA @ Conjugal transfer protein TraA
36	group_1368		SRS2420927	2	81516	82010	+	hypothetical protein	2	81516	82010	+	FIG01045827: hypothetical protein
36	group_1369		SRS2420927	2	82047	82424	+	hypothetical protein	2	82047	82424	+	hypothetical protein
36	group_1370		SRS2420927	2	83424	83627	-	hypothetical protein	2	83627	83424	-	Transcriptional regulator, AlpA like
10	group_731		SRS2420927	2	98106	98423	-	hypothetical protein
14	bsdD		SRS2420927	2	235502	235738	+	Phenolic acid decarboxylase subunit D	2	235502	235738	+	Hydroxyaromatic non-oxidative decarboxylase protein D (EC 4.1.1.-)
13	group_1371		SRS2420927	2	318691	319161	-	hypothetical protein	2	319161	318691	-	Prepilin peptidase dependent protein A precursor
25	group_1		SRS2420927	3	208678	208803	+	hypothetical protein	3	208678	208803	+	hypothetical protein
13	group_1372		SRS2420927	3	458030	458491	-	hypothetical protein	3	458221	458030	-	FIG01047222: hypothetical protein
4	intQ		SRS2420927	3	657518	658810	-	Putative defective protein IntQ	3	658858	657518	-	Lambdoid phage Rac integrase	Prophage Region 7
4	group_734		SRS2420927	3	658855	659103	-	hypothetical protein	3	659103	658855	-	Phage excisionase
4	group_96		SRS2420927	3	659144	659383	-	hypothetical protein	3	659383	659144	-	hypothetical protein
20	group_736		SRS2420927	3	659426	660535	-	hypothetical protein	3	660535	659426	-	Gifsy-2 prophage RecT
33	group_228		SRS2420927	3	659426	660535	-	hypothetical protein	3	663473	660546	-	Gifsy-1 prophage RecE
6	group_159		SRS2420927	3	663600	663887	-	hypothetical protein	3	663887	663600	-	prophage protein
4	group_389		SRS2420927	3	673003	673350	+	hypothetical protein	3	673003	673350	+	Phage holin
9	group_741		SRS2420927	3	673353	673979	+	hypothetical protein	3	673353	673979	+	Lytic enzyme
35	group_412		SRS2420927	3	674573	675124	+	hypothetical protein	3	674621	675124	+	hypothetical protein
34	group_1380		SRS2420927	3	675179	675370	-	hypothetical protein	3	675424	675179	-	hypothetical protein
34	group_742		SRS2420927	3	675446	675670	-	hypothetical protein	3	675670	675446	-	FIG01046582: hypothetical protein
32	group_235		SRS2420927	3	678509	680044	+	hypothetical protein	3	678509	680044	+	Phage portal protein
18	group_43		SRS2420927	3	688635	689333	+	hypothetical protein	3	688635	689333	+	Phage minor tail protein
5	group_416	intA_1	SRS2420927	4	294839	296092	+	Prophage integrase IntA	4	294839	296092	+	Phage integrase, Phage P4-associated	Prophage Region 8
1	group_1381		SRS2420927	4	296129	296803	-	hypothetical protein	4	296803	296129	-	Protein containing HNH endonuclease domain
1	group_743		SRS2420927	4	296807	298039	-	hypothetical protein	4	298039	296807	-	hypothetical protein
1	group_1382		SRS2420927	4	298159	298344	+	hypothetical protein
19	group_160		SRS2420927	4	298308	298874	-	hypothetical protein	4	298874	298308	-	Phage polarity suppression protein
2	group_744		SRS2420927	4	298890	299135	-	hypothetical protein	4	299135	298890	-	Phage late gene regulator
1	group_417		SRS2420927	4	299132	299869	-	hypothetical protein	4	299869	299132	-	Phage capsid and scaffold protein
3	group_746		SRS2420927	4	300410	300676	+	hypothetical protein	4	300410	300676	+	Phage DNA binding protein
1	group_1383		SRS2420927	4	300892	301224	+	hypothetical protein	4	300892	301224	+	Phage immunity repressor protein
3	group_162		SRS2420927	4	301221	301448	+	hypothetical protein	4	301221	301448	+	hypothetical protein
5	group_1384		SRS2420927	4	301445	301765	+	hypothetical protein	4	301445	301765	+	DNA replication protein, phage-associated
3	traC		SRS2420927	4	301780	304113	+	DNA primase TraC	4	301780	304113	+	Zinc binding domain / DNA primase (EC 2.7.7.-), Phage P4-associated / Replicative helicase RepA, Phage P4-associated
16	ldrD		SRS2420927	5	195020	195127	-	Small toxic polypeptide LdrD	5	195151	195020	-	Small inner membrane protein, YmgF family
1	malS_1		SRS2420927	5	235725	236411	+	Periplasmic alpha-amylase	5	235725	236411	+	Periplasmic alpha-amylase (EC 3.2.1.1)
15	sadA_1		SRS2420927	5	269009	270619	+	Autotransporter adhesin SadA	5	269009	270619	+	Putative inner membrane protein
54	group_88	icsA_2	SRS2420927	5	335429	335854	+	hypothetical protein	5	335429	335854	+	autotransporter
7	group_335		SRS2420927	5	350250	350489	-	hypothetical protein	5	350504	350250	-	PTS system, D-glucosaminate-specific IID component
12	group_1386		SRS2420927	6	60039	60707	-	hypothetical protein	6	60707	60039	-	hypothetical protein
12	group_1387		SRS2420927	6	60750	60974	+	hypothetical protein	6	60750	60974	+	hypothetical protein
8	group_420		SRS2420927	7	681	1367	-	hypothetical protein	7	1367	681	-	hypothetical protein
4	group_750		SRS2420927	7	1638	1892	-	hypothetical protein	7	1829	1638	-	Virulence protein msgA
27	group_1395		SRS2420927	7	197439	197864	-	hypothetical protein	7	197864	197439	-	putative regulator	Prophage Region 9
22	group_755		SRS2420927	7	197961	198215	+	hypothetical protein	7	197961	198215	+	hypothetical protein
22	group_1397		SRS2420927	7	198202	198696	+	hypothetical protein	7	198202	198696	+	hypothetical protein
21	dnaT_2		SRS2420927	7	198743	199750	+	Primosomal protein 1	7	198743	199750	+	Uncharacterized phage-associated protein YdaU
21	group_1398		SRS2420927	7	199743	200204	+	hypothetical protein	7	199782	200204	+	FIG01046796: hypothetical protein
22	group_421		SRS2420927	7	200218	200613	+	hypothetical protein	7	200218	200613	+	Putative DNA-binding protein
22	cph2		SRS2420927	7	200900	202030	-	Phytochrome-like protein cph2	7	202030	200900	-	Diguanylate cyclase (EC 2.7.7.65) => DgcY
22	yjcS		SRS2420927	7	202427	204406	+	Putative alkyl/aryl-sulfatase YjcS	7	202427	204406	+	Putative alkyl/aryl-sulfatase YjcS
22	group_422		SRS2420927	7	205038	205343	+	hypothetical protein	7	205125	205343	+	FIG01047714: hypothetical protein
23	group_378	fruA_3	SRS2420927	11	33863	33967	+	PTS system fructose-specific EIIB'BC component	11	33863	33967	+	PTS system, fructose-specific IIB component (EC 2.7.1.202) / PTS system, fructose-specific IIC component
28	group_771		SRS2420927	12	3452	4153	-	hypothetical protein	12	4153	3452	-	Phage DNA replication protein P	Prophage Region 11
29	group_403		SRS2420927	12	5147	5467	-	hypothetical protein	12	5467	5147	-	Gifsy-1 prophage cI
17	ccmA		SRS2420927	15	1	618	+	Cytochrome c biogenesis ATP-binding export protein CcmA	15	1	618	+	ABC transporter involved in cytochrome c biogenesis, ATPase component CcmA
24	group_772		SRS2420927	15	5734	6108	-	hypothetical protein	15	5227	6201	+	Cytochrome c heme lyase subunit CcmL / Cytochrome c heme lyase subunit CcmH
52	group_246	ycdX	SRS2628565	1	1642	2379	+	putative phosphatase YcdX	1	1642	2379	+	Putative hydrolase YcdX (EC 3.1.-.-)
56	group_2391		SRS2628565	1	109453	109632	+	hypothetical protein	1	109453	109632	+	FIG00643873: hypothetical protein	Prophage Region 1
30	group_407		SRS2628565	1	109622	110581	+	hypothetical protein	1	109622	110581	+	Phage DNA replication protein O
30	group_718		SRS2628565	1	110583	111065	+	hypothetical protein	1	110583	111065	+	FIG00641663: hypothetical protein
30	group_787		SRS2628565	1	111065	111718	+	hypothetical protein	1	111065	111718	+	Phage DNA N-6-adenine methyltransferase
30	rusA		SRS2628565	1	111715	112104	+	Crossover junction endodeoxyribonuclease RusA	1	111715	112104	+	Holliday junction resolvase / Crossover junction endodeoxyribonuclease rusA (EC 3.1.22.-)
31	group_1879		SRS2628565	1	112543	112953	+	hypothetical protein	1	112543	112953	+	Phage tail fiber assembly protein GpG
57	group_226		SRS2628565	1	114535	114795	+	hypothetical protein	1	114535	114795	+	ISSod13, transposase
26	group_7882		SRS2628565	2	675050	675652	+	hypothetical protein	2	675050	675652	+	Gifsy-2 prophage protein STM1020/STM2620	Prophage Region 6
40	group_824		SRS2628565	2	695559	696164	-	hypothetical protein	2	695574	696311	+	Phage tail tip, assembly protein K
53	group_90		SRS2628565	5	58479	58904	-	hypothetical protein	5	58904	58479	-	autotransporter

## Sheet: Clade II
Scoary gene group	Gene	Non-unique Gene name	Annotation	No. pos. present in	No. neg. present in	No. pos. not present in	No. neg. not present in	Sensitivity	Specificity	Odds ratio	Naïve p	Bonferroni p	Benjamini H p	Max Pairwise comparisons	Max supporting pairs	Max opposing pairs	Best pairwise comp. p	Worst pairwise comp. p	Empirical p
1	group_794--bin3--group_793--group_1593--group_1595--ccdA--group_1580--group_1604--spo0J--group_1603--group_1504--fimD_4--group_1578--group_1556--group_1555--group_1576--qseB_2--group_1553--group_1590--group_1511--group_1608--group_1602--umuC_3--group_1559--group_1586--umuD_2--group_1571--group_1582--group_791--soj--group_1569--group_1577--faeE_2--group_1524--group_1575--group_1516--repA--group_15…	"--------pld------------tfaE_1------clpP_1----------------------------------------yejK_1------------------------------------yedK--------traI------------kdgT_2----xerC_1	hypothetical protein--Putative transposon Tn552 DNA-invertase bin3--hypothetical protein--hypothetical protein--Phospholipase D--Antitoxin CcdA--hypothetical protein--hypothetical protein--Stage 0 sporulation protein J--hypothetical protein--Prophage tail fiber assembly protein TfaE--Outer membrane usher protein FimD--hypothetical protein--ATP-dependent Clp protease proteolytic subunit--hypotheti…	4	0	0	107	100	100	inf	1.66973e-07	0.000120554	1.85468e-06	1	1	0	1	1	0.0990099
2	dnaB_1--group_1506--group_773--group_1519--group_1507--group_1505--group_775	------------	Replicative DNA helicase--hypothetical protein--hypothetical protein--hypothetical protein--hypothetical protein--hypothetical protein--hypothetical protein	4	1	0	106	100	99.0654	inf	8.34863e-07	0.000602771	7.63002e-06	1	1	0	1	1	0.108911
3	group_1513--group_1514--group_1512--group_1515--group_1509--group_1508	----------	hypothetical protein--hypothetical protein--hypothetical protein--hypothetical protein--hypothetical protein--hypothetical protein	4	2	0	105	100	98.1308	inf	2.50459e-06	0.00180831	2.07852e-05	1	1	0	1	1	0.0693069
4	group_796		hypothetical protein	4	2	0	105	100	98.1308	inf	2.50459e-06	0.00180831	2.07852e-05	1	1	0	1	1	0.00990099
5	group_432		hypothetical protein	4	2	0	105	100	98.1308	inf	2.50459e-06	0.00180831	2.07852e-05	1	1	0	1	1	0.00990099
6	group_72	ccmH_2	Cytochrome c-type biogenesis protein CcmH	4	3	0	104	100	97.1963	inf	5.84404e-06	0.0042194	4.01847e-05	1	1	0	1	1	0.00990099
7	group_779--group_1520--group_434--group_1521--group_1503--group_778--group_774--group_433	--------------	hypothetical protein--hypothetical protein--hypothetical protein--hypothetical protein--hypothetical protein--hypothetical protein--hypothetical protein--hypothetical protein	4	3	0	104	100	97.1963	inf	5.84404e-06	0.0042194	4.01847e-05	1	1	0	1	1	0.0891089
8	group_780	recE_3	hypothetical protein	4	3	0	104	100	97.1963	inf	5.84404e-06	0.0042194	4.01847e-05	1	1	0	1	1	0.019802
9	xerD_4--repB--group_172	----	Tyrosine recombinase XerD--RepFIB replication protein A--hypothetical protein	4	3	0	104	100	97.1963	inf	5.84404e-06	0.0042194	4.01847e-05	1	1	0	1	1	0.00990099
10	group_1535--group_1537--group_1536--hsdR--group_1538	--------	hypothetical protein--putative type I restriction enzymeP M protein--hypothetical protein--Type-1 restriction enzyme R protein--hypothetical protein	4	3	0	104	100	97.1963	inf	5.84404e-06	0.0042194	4.01847e-05	1	1	0	1	1	0.019802
11	group_1543--group_1540--group_784--group_783--group_1546--group_1541--yfjZ--ypjF--hsdM	------intA_1----------	hypothetical protein--hypothetical protein--hypothetical protein--Prophage integrase IntA--hypothetical protein--hypothetical protein--Putative antitoxin YfjZ--putative toxin YpjF--Type I restriction enzyme EcoKI M protein	4	4	0	103	100	96.2617	inf	1.16881e-05	0.0084388	6.2296e-05	1	1	0	1	1	0.00990099
12	group_133	pipB	Secreted effector protein PipB	4	5	0	102	100	95.3271	inf	2.10386e-05	0.0151898	7.19897e-05	1	1	0	1	1	0.00990099
13	group_1344--group_1343--group_722--group_1341--group_1342--group_726--group_727--group_1345	--------------	hypothetical protein--hypothetical protein--hypothetical protein--hypothetical protein--hypothetical protein--hypothetical protein--hypothetical protein--hypothetical protein	4	6	0	101	100	94.3925	inf	3.50643e-05	0.0253164	0.0001156	1	1	0	1	1	0.00990099
14	group_724		hypothetical protein	4	7	0	100	100	93.4579	inf	5.5101e-05	0.0397829	0.000180013	1	1	0	1	1	0.019802
15	group_3090--group_3163--group_3091--group_3142--group_3099--group_3152--group_3176--group_3131--group_3147--group_3168--group_3092--group_3177--group_3104--group_3136--group_3084--group_280--group_3133--group_470--group_3171--group_3141--group_3111--group_958--group_3114--traR--group_3167--group_3103--group_3112--ylpA--group_3107--group_3080--group_3149--group_3160--group_3102--group_3105--group_…	--------------------------traD------eae----noc------------------------traC------------------intA_3------------------------------------------------------------------klcA--------------ssb_2--psiB------------------	hypothetical protein--hypothetical protein--hypothetical protein--hypothetical protein--hypothetical protein--hypothetical protein--hypothetical protein--hypothetical protein--hypothetical protein--hypothetical protein--hypothetical protein--hypothetical protein--hypothetical protein--Coupling protein TraD--hypothetical protein--hypothetical protein--Intimin--hypothetical protein--Nucleoid occlus…	3	0	1	107	75	100	inf	1.8033e-05	0.0130199	6.2296e-05	1	1	0	1	1	0.108911
16	group_1605		hypothetical protein	3	0	1	107	75	100	inf	1.8033e-05	0.0130199	6.2296e-05	1	1	0	1	1	0.049505
17	yopJ_2--eae--tfaE_1	----	Effector protein YopJ--Intimin--Prophage tail fiber assembly protein TfaE	1	107	3	0	25	0	0	1.8033e-05	0.0130199	6.2296e-05	1	0	1	1	1	0.186047
18	group_542		hypothetical protein	0	100	4	7	0	6.54206	0	5.5101e-05	0.0397829	0.000180013	1	0	1	1	1	0.00990099
19	tfaE_2		Prophage tail fiber assembly protein TfaE	0	102	4	5	0	4.6729	0	2.10386e-05	0.0151898	7.19897e-05	1	0	1	1	1	0.019802
20	pipB		Secreted effector protein PipB	0	103	4	4	0	3.73832	0	1.16881e-05	0.0084388	6.2296e-05	1	0	1	1	1	0.019802
21	group_221--group_1058--group_546--icd_2--sspH1--group_1076--yedK	------------	hypothetical protein--hypothetical protein--hypothetical protein--Isocitrate dehydrogenase [NADP]--E3 ubiquitin-protein ligase SspH1--hypothetical protein--Putative SOS response-associated peptidase YedK	0	106	4	1	0	0.934579	0	8.34863e-07	0.000602771	7.63002e-06	1	0	1	1	1	0.00990099
22	kdgT_1		2-keto-3-deoxygluconate permease	0	107	4	0	0	0	0	1.66973e-07	0.000120554	1.85468e-06	1	0	1	1	1	0.175439

## Sheet: Clade II - Detailed Summary
Scoary Gene Group	Gene	Gene name	Isolate	Prokka Annotation					RASTtk Annotation					MGE Region
				Contig	Start	Stop	Strand	Product	Contig	Start	Stop	Strand	Function
1	group_1524	yejK_1	SRS2822480	1	4957	5964	+	Nucleoid-associated protein YejK	1	4957	5964	+	Nucleoid-associated protein NdpA
15	group_3080		SRS2822480	1	385692	385856	+	hypothetical protein	1	385828	385676	-	hypothetical protein	Prophage Region 1
12	group_133	pipB	SRS2822480	2	47784	48659	+	Secreted effector protein PipB	2	47784	48659	+	Pentapeptide repeat family protein	Potential MGE
2	group_773		SRS2822480	2	49715	49981	+	hypothetical protein	2	49715	49981	+	hypothetical protein
7	group_1503		SRS2822480	2	49997	50188	-	hypothetical protein	2	50188	49997	-	hypothetical protein
7	group_774		SRS2822480	2	50297	51019	-	hypothetical protein	2	51019	50297	-	hypothetical protein
1	group_1504	tfaE_1	SRS2822480	2	51087	51680	-	Prophage tail fiber assembly protein TfaE	2	51680	51087	-	Phage tail fiber assembly protein
2	group_1505		SRS2822480	2	57072	58124	-	hypothetical protein	2	58124	57072	-	hypothetical protein
2	group_1506		SRS2822480	2	58124	58399	-	hypothetical protein	2	58399	58124	-	FIG01047636: hypothetical protein
2	group_1507		SRS2822480	2	58396	59112	-	hypothetical protein	2	59112	58396	-	hypothetical protein
3	group_1508		SRS2822480	2	62255	63649	-	hypothetical protein	2	63649	62255	-	hypothetical protein
2	group_775		SRS2822480	2	74110	74379	-	hypothetical protein	2	74379	74110	-	hypothetical protein	Prophage Region 3
1	group_776		SRS2822480	2	74986	75600	-	hypothetical protein	2	75600	74986	-	Lytic enzyme
3	group_1509		SRS2822480	2	76996	77574	-	hypothetical protein	2	77442	76996	-	Phage antitermination protein Q
1	ybcO		SRS2822480	2	77571	77864	-	Putative nuclease YbcO	2	77864	77571	-	Uncharacterized protein YbcO
1	group_1511		SRS2822480	2	77861	78457	-	hypothetical protein	2	78457	77861	-	Gifsy-2 prophage protein STM1020/STM2620
3	group_1512		SRS2822480	2	78526	78717	-	hypothetical protein	2	78717	78526	-	hypothetical phage-related protein
3	group_1513		SRS2822480	2	78901	79239	-	hypothetical protein	2	79239	78901	-	FIG00640949: hypothetical protein
3	group_1514		SRS2822480	2	79406	80008	-	hypothetical protein	2	80008	79406	-	Adenine DNA methyltransferase, phage-associated
3	group_1515		SRS2822480	2	80001	80249	-	hypothetical protein	2	80249	80001	-	hypothetical protein
1	group_1516		SRS2822480	2	80253	80933	-	hypothetical protein	2	80933	80253	-	hypothetical protein
2	dnaB_1		SRS2822480	2	80971	82335	-	Replicative DNA helicase	2	82335	80971	-	DNA helicase, phage-associated
5	group_432		SRS2822480	2	82355	83404	-	hypothetical protein	2	83404	82355	-	Primosomal protein I
7	group_433		SRS2822480	2	83410	83634	-	hypothetical protein	2	83634	83410	-	hypothetical protein
7	group_778		SRS2822480	2	83657	84232	-	hypothetical protein	2	84004	83657	-	FIG01049106: hypothetical protein
1	group_1518		SRS2822480	2	84500	84964	+	hypothetical protein	2	84500	84964	+	hypothetical protein
2	group_1519		SRS2822480	2	85650	85973	+	hypothetical protein	2	85650	85973	+	hypothetical protein
7	group_779		SRS2822480	2	85981	86226	+	hypothetical protein	2	85981	86226	+	hypothetical protein
8	group_780	recE_3	SRS2822480	2	86256	88529	+	hypothetical protein	2	86256	88529	+	hypothetical protein
7	group_1520		SRS2822480	2	88526	89080	+	hypothetical protein	2	88526	89080	+	hypothetical protein
7	group_1521		SRS2822480	2	89083	89265	+	hypothetical protein	2	89083	89265	+	hypothetical protein
7	group_434		SRS2822480	2	89478	89702	+	hypothetical protein	2	89478	89702	+	hypothetical protein
1	group_1522	xerC_1	SRS2822480	2	89703	90725	+	Tyrosine recombinase XerC	2	89703	90725	+	Integrase
1	group_1523		SRS2822480	2	90718	92004	-	hypothetical protein	2	92004	90718	-	hypothetical protein
13	group_727		SRS2822480	2	130029	130616	-	hypothetical protein	2	130616	130029	-	Uncharacterized protein YmfQ in lambdoid prophage e14 region	Prophage Region 4
13	group_726		SRS2822480	2	130619	131698	-	hypothetical protein	2	131698	130619	-	Putative protein JayE from lambdoid prophage e14 region
13	group_1345		SRS2822480	2	132109	132642	-	hypothetical protein	2	132642	132109	-	Prophage baseplate assembly protein V
14	group_724		SRS2822480	2	132642	133700	-	hypothetical protein	2	133700	132642	-	Prophage tail protein
13	group_1344		SRS2822480	2	133697	135037	-	hypothetical protein	2	135037	133697	-	Phage tail/DNA circulation protein
15	group_3084		SRS2822480	2	135097	135546	-	hypothetical protein	2	135330	135097	-	hypothetical protein
13	group_1343		SRS2822480	2	137573	137899	-	hypothetical protein	2	137899	137573	-	hypothetical protein
13	group_1342		SRS2822480	2	137896	138252	-	hypothetical protein	2	138252	137896	-	Phage tail tube protein
13	group_1341		SRS2822480	2	138252	139748	-	hypothetical protein	2	139748	138252	-	Bacteriophage tail sheath protein
13	group_722		SRS2822480	2	139738	139902	-	hypothetical protein	2	139902	139738	-	Mu-like prophage FluMu protein GP38
15	group_3085		SRS2822480	2	139924	140469	-	hypothetical protein	2	140469	139924	-	IS, phage, Tn, Transposon-related functions
1	group_793		SRS2822480	2	140466	140978	-	hypothetical protein	2	140978	140466	-	hypothetical protein
1	group_792		SRS2822480	2	140950	141363	-	hypothetical protein	2	141363	140950	-	hypothetical protein
1	group_1559		SRS2822480	2	141375	141698	-	hypothetical protein	2	141698	141375	-	hypothetical protein
15	group_3086		SRS2822480	2	141698	141922	-	hypothetical protein	2	141922	141698	-	hypothetical protein
15	group_3087		SRS2822480	2	141966	143183	-	hypothetical protein	2	143183	141966	-	Phage major capsid protein
1	group_1556	clpP_1	SRS2822480	2	143193	144041	-	ATP-dependent Clp protease proteolytic subunit	2	144041	143193	-	Prophage Clp protease-like protein
1	group_1555		SRS2822480	2	144055	145359	-	hypothetical protein	2	145359	144055	-	Phage portal protein
1	group_1554		SRS2822480	2	145359	147101	-	hypothetical protein	2	147101	145359	-	Phage terminase, large subunit
1	group_1553		SRS2822480	2	147055	147519	-	hypothetical protein	2	147519	147055	-	Phage terminase, small subunit
1	group_791		SRS2822480	2	147652	148041	-	hypothetical protein	2	147894	147652	-	hypothetical protein
15	group_3088		SRS2822480	2	148092	148415	+	hypothetical protein	2	148092	148415	+	hypothetical protein
15	group_3089		SRS2822480	2	148900	149379	-	hypothetical protein	2	149379	148900	-	Rz endopeptidase from lambdoid phage
15	group_3090		SRS2822480	2	191666	192127	-	hypothetical protein	2	192127	191666	-	DNA internalization-related competence protein ComEC/Rec2
15	group_955		SRS2822480	2	791655	792818	+	hypothetical protein	2	791655	792818	+	hypothetical protein	Prophage Region 6
15	group_3091		SRS2822480	2	792926	794890	-	hypothetical protein	2	794890	792926	-	Phage tail fibers
15	group_3092		SRS2822480	2	795070	795972	-	hypothetical protein	2	795972	795070	-	putative antirepressor protein
15	group_3095		SRS2822480	2	796561	796980	-	hypothetical protein	2	796980	796561	-	hypothetical protein
15	group_3097		SRS2822480	2	797615	799444	-	hypothetical protein	2	799444	797615	-	Phage DNA transfer protein
15	group_3098		SRS2822480	2	809180	810640	-	hypothetical protein	2	810640	809180	-	Bacteriophage terminase, large subunit
15	group_3099		SRS2822480	2	810640	811098	-	hypothetical protein	2	811098	810640	-	Phage terminase, small subunit
15	group_3100		SRS2822480	2	811515	811904	-	hypothetical protein	2	811904	811515	-	Phage protein
15	group_3102		SRS2822480	2	812373	812903	-	hypothetical protein	2	812903	812373	-	Phage protein
15	group_3103		SRS2822480	2	814243	814479	-	hypothetical protein
15	group_3104		SRS2822480	2	821962	822294	+	hypothetical protein	2	821962	822294	+	Phage antitermination protein N
15	group_3105		SRS2822480	2	822327	822527	+	hypothetical protein	2	822327	822527	+	antirestriction protein
15	group_3106		SRS2822480	2	822567	822890	+	hypothetical protein	2	822567	822890	+	hypothetical protein
15	group_3107		SRS2822480	2	823483	823635	+	hypothetical protein	2	823483	823635	+	Phage protein
15	group_3108		SRS2822480	2	823616	823804	+	hypothetical protein	2	823616	823804	+	FIG01045708: hypothetical protein
15	group_3109		SRS2822480	2	823794	823937	+	hypothetical protein	2	823794	823937	+	DNA recombinase, phage-associated
15	group_3110		SRS2822480	2	823934	824551	+	hypothetical protein	2	823934	824551	+	Phage essential recombination function protein, Erf
15	group_3111		SRS2822480	2	824551	824835	+	hypothetical protein	2	824551	824835	+	Phage anti-RecBCD 1
15	group_3112		SRS2822480	2	824882	825175	+	hypothetical protein	2	824882	825175	+	hypothetical protein
15	group_3113		SRS2822480	2	825186	825359	+	hypothetical protein	2	825186	825359	+	Phage protein (ACLAME 770)
15	group_3114		SRS2822480	2	825356	825775	+	hypothetical protein	2	825356	825775	+	Eae protein
15	group_3115		SRS2822480	2	825885	826244	+	hypothetical protein	2	825885	826244	+	Phage EaF protein
15	group_3116		SRS2822480	2	827227	827433	+	hypothetical protein	2	827227	827433	+	hypothetical protein
15	group_3117		SRS2822480	2	827883	828797	+	hypothetical protein	2	827883	828797	+	hypothetical protein
15	group_3118		SRS2822480	2	828874	829140	+	hypothetical protein	2	828874	829140	+	hypothetical protein
11	group_1546		SRS2822480	3	150966	151973	-	hypothetical protein	3	151973	150966	-	putative restriction endonuclease	Potential MGE
11	ypjF		SRS2822480	3	152232	152573	-	putative toxin YpjF	3	152573	152232	-	YkfI toxin protein
11	yfjZ		SRS2822480	3	152594	152935	-	Putative antitoxin YfjZ	3	152935	152594	-	YfjZ protein (antitoxin to YpjF)
11	group_1543		SRS2822480	3	153000	153104	-	hypothetical protein	3	153104	153000	-	hypothetical protein
11	hsdM		SRS2822480	3	153303	155756	+	Type I restriction enzyme EcoKI M protein	3	153303	155756	+	Type I restriction-modification system, DNA-methyltransferase subunit M
11	group_1541		SRS2822480	3	155765	157132	+	hypothetical protein	3	155765	157132	+	Type I restriction-modification system, specificity subunit S
11	group_1540		SRS2822480	3	157129	158562	+	hypothetical protein	3	157129	158562	+	hypothetical protein
11	group_784		SRS2822480	3	158555	160588	+	hypothetical protein	3	158555	160588	+	RloF
10	hsdR		SRS2822480	3	160585	163680	+	Type-1 restriction enzyme R protein	3	160585	163680	+	Type I restriction-modification system, restriction subunit R
10	group_1538		SRS2822480	3	163680	164393	+	hypothetical protein	3	163680	164393	+	Putative predicted metal-dependent hydrolase
10	group_1537		SRS2822480	3	164439	165920	-	putative type I restriction enzymeP M protein	3	165920	164439	-	Type I restriction-modification system, DNA-methyltransferase subunit M
10	group_1536		SRS2822480	3	165913	166515	-	hypothetical protein	3	166515	165913	-	hypothetical protein
10	group_1535		SRS2822480	3	166532	166720	-	hypothetical protein	3	166780	166532	-	hypothetical protein
11	group_783	intA_1	SRS2822480	3	166983	168230	-	Prophage integrase IntA	3	168230	166983	-	Integrase
15	group_3119	intA_3	SRS2822480	4	73904	75133	+	Prophage integrase IntA	4	73862	75133	+	Prophage CP4-57 integrase	Potential MGE
15	group_470		SRS2822480	4	76989	78809	+	hypothetical protein	4	76989	78809	+	plasmid-related protein
15	group_3122		SRS2822480	4	78864	79340	-	hypothetical protein	4	79340	78864	-	hypothetical protein
15	group_3125		SRS2822480	4	82604	83938	+	hypothetical protein	4	82604	83938	+	hypothetical protein
15	group_3126		SRS2822480	4	84251	84904	+	hypothetical protein	4	84251	84904	+	hypothetical protein
15	group_958		SRS2822480	4	85877	87508	-	hypothetical protein	4	87508	85877	-	hypothetical protein
15	group_3129		SRS2822480	4	87505	88818	-	hypothetical protein	4	88818	87505	-	hypothetical protein
15	xerC_3		SRS2822480	4	88820	90025	-	Tyrosine recombinase XerC	4	90025	88820	-	putative site specific recombinase
15	group_3131		SRS2822480	4	90355	90561	-	hypothetical protein	4	90561	90355	-	Transcriptional regulator, AlpA like
15	group_3132		SRS2822480	4	90662	91513	-	hypothetical protein	4	91513	90662	-	hypothetical protein
15	yicI_1		SRS2822480	5	66512	66652	+	Alpha-xylosidase	5	66512	66652	+	alpha-xylosidase (EC 3.2.1.177)
15	group_3133	eae	SRS2822480	6	134	2179	+	Intimin	6	134	2179	+	adherence and invasion outermembrane protein (Inv,enhances Peyer's patches colonization)
1	group_1548	kdgT_2	SRS2822480	7	125002	125955	+	2-keto-3-deoxygluconate permease	7	125002	125955	+	2-keto-3-deoxygluconate permease (KDG permease)
1	group_376		SRS2822480	7	182477	183643	-	hypothetical protein	7	183643	182477	-	hypothetical protein
15	group_3135		SRS2822480	9	79782	80006	+	hypothetical protein	9	79815	80006	+	hypothetical protein
15	group_280		SRS2822480	9	99100	99297	+	hypothetical protein	9	99100	99297	+	Putative membrane protein
15	group_437		SRS2822480	13	158	937	-	hypothetical protein	13	937	158	-	hypothetical protein	Plasmid
1	group_794		SRS2822480	13	991	1164	-	hypothetical protein	13	1164	991	-	Adenine-specific methyltransferase
1	group_1589	yedK	SRS2822480	13	1524	2195	+	Putative SOS response-associated peptidase YedK	13	1524	2195	+	Putative SOS response-associated peptidase YedK
1	umuD_2		SRS2822480	13	2373	2795	+	Protein UmuD	13	2373	2795	+	Error-prone repair protein UmuD
1	umuC_3		SRS2822480	13	2795	4069	+	Protein UmuC	13	2795	4069	+	Error-prone, lesion bypass DNA polymerase V (UmuC)
1	group_1586		SRS2822480	13	4168	4491	-	hypothetical protein	13	4491	4168	-	hypothetical protein
1	group_1585		SRS2822480	13	4488	4925	-	hypothetical protein	13	4925	4488	-	hypothetical protein
1	spo0J		SRS2822480	13	4925	5956	-	Stage 0 sporulation protein J	13	5956	4925	-	Chromosome (plasmid) partitioning protein ParB
1	soj		SRS2822480	13	5956	6822	-	Chromosome-partitioning ATPase Soj	13	6822	5956	-	Chromosome (plasmid) partitioning protein ParA
1	group_1582		SRS2822480	13	7371	7595	+	hypothetical protein	13	7371	7595	+	hypothetical protein
1	group_1581		SRS2822480	13	7665	8438	-	hypothetical protein	13	8438	7665	-	hypothetical protein
1	group_1580		SRS2822480	13	8561	9508	-	hypothetical protein	13	9508	8561	-	Abortive infection bacteriophage resistance protein
1	bin3		SRS2822480	13	10028	10660	+	Putative transposon Tn552 DNA-invertase bin3	13	10028	10660	+	putative resolvase
1	group_1578		SRS2822480	13	10714	10914	+	hypothetical protein	13	10714	10914	+	hypothetical protein
1	group_1577		SRS2822480	13	11440	11742	-	hypothetical protein	13	11742	11440	-	Mobile element protein
1	group_1576		SRS2822480	13	11898	12875	-	hypothetical protein	13	12875	11898	-	hypothetical protein
1	group_1575		SRS2822480	13	13024	13548	-	hypothetical protein	13	13548	13024	-	AfrD
1	faeE_2		SRS2822480	13	13535	14236	-	Chaperone protein FaeE	13	14236	13535	-	Kappa-fimbriae chaperone protein
1	fimD_4		SRS2822480	13	14229	16715	-	Outer membrane usher protein FimD	13	16715	14229	-	hypothetical protein
1	group_1572		SRS2822480	13	16840	17382	-	hypothetical protein	13	17382	16840	-	hypothetical protein
1	group_1571		SRS2822480	13	18310	18642	+	hypothetical protein	13	18310	18642	+	Mobile element protein
1	xerD_5		SRS2822480	13	19268	20059	-	Tyrosine recombinase XerD	13	20059	19268	-	Resolvase
1	group_1569		SRS2822480	13	20049	20375	-	hypothetical protein	13	20375	20049	-	putative cytoplasmic protein
1	ccdB		SRS2822480	13	20377	20682	-	Toxin CcdB	13	20682	20377	-	CcdB toxin protein
1	ccdA		SRS2822480	13	20684	20902	-	Antitoxin CcdA	13	20902	20684	-	CcdA protein (antitoxin to CcdB)
1	group_1610		SRS2822480	13	21511	24720	-	hypothetical protein	13	24720	21511	-	hypothetical protein
9	group_172		SRS2822480	13	24952	25482	-	hypothetical protein	13	25482	24952	-	Acetyltransferase
4	group_796		SRS2822480	13	25486	25755	-	hypothetical protein	13	25755	25486	-	hypothetical protein
9	repB		SRS2822480	13	26614	27591	+	RepFIB replication protein A	13	26614	27591	+	RepFIB replication protein A
9	xerD_4		SRS2822480	13	27848	28588	-	Tyrosine recombinase XerD	13	28588	27848	-	Resolvase
1	group_1608		SRS2822480	13	29848	30492	-	hypothetical protein	13	30492	29848	-	hypothetical protein
1	qseB_2		SRS2822480	13	30743	31291	-	Transcriptional regulatory protein QseB	13	31291	30743	-	Two-component system response regulator QseB
1	pdeG		SRS2822480	13	31554	32327	-	putative cyclic di-GMP phosphodiesterase PdeG	13	32327	31554	-	diguanylate cyclase/phosphodiesterase (GGDEF & EAL domains) with PAS/PAC sensor(s)
1	group_795		SRS2822480	13	32471	32626	-	hypothetical protein
16	group_1605		SRS2822480	13	32589	33101	-	hypothetical protein	13	33428	32589	-	Right origin-binding protein
1	group_1604		SRS2822480	13	33632	33979	+	hypothetical protein	13	33632	33979	+	Mobile element protein
1	group_1603		SRS2822480	13	34203	35390	-	hypothetical protein	13	35390	34203	-	hypothetical protein
1	group_1602		SRS2822480	13	35414	37723	-	hypothetical protein	13	37723	35414	-	hypothetical protein
1	group_1601		SRS2822480	13	37776	38333	-	hypothetical protein	13	38333	37776	-	hypothetical protein
1	group_1600		SRS2822480	13	38353	39162	-	hypothetical protein	13	39162	38353	-	hypothetical protein
1	group_1599		SRS2822480	13	40075	40374	-	hypothetical protein	13	40374	40075	-	hypothetical protein
1	group_1598		SRS2822480	13	40544	40792	+	hypothetical protein	13	40544	40792	+	hypothetical protein
1	repA		SRS2822480	13	42371	43150	-	Replication initiation protein	13	43150	42371	-	Replication initiation protein
1	group_1596		SRS2822480	13	43447	43713	-	hypothetical protein	13	43713	43447	-	Replication regulatory protein repA2 (Protein copB)
1	group_1595	pld	SRS2822480	13	43829	44416	-	Phospholipase D	13	44416	43829	-	Endonuclease
1	group_1594		SRS2822480	13	44514	44822	-	hypothetical protein	13	44822	44514	-	FIG00243524: hypothetical protein
1	group_1593		SRS2822480	13	44819	45151	-	hypothetical protein	13	45151	44819	-	hypothetical protein
1	group_1592		SRS2822480	13	45148	45351	-	hypothetical protein	13	45351	45148	-	hypothetical protein
1	group_1591		SRS2822480	13	45392	46123	-	hypothetical protein	13	46123	45392	-	IncF plasmid conjugative transfer pilin acetylase TraX
1	group_1590		SRS2822480	13	46120	46686	-	hypothetical protein	13	46686	46120	-	hypothetical protein
1	group_436	traI	SRS2822480	13	46705	52008	-	Multifunctional conjugation protein TraI	13	52008	46705	-	hypothetical protein
15	group_3136	traD	SRS2822480	13	52008	54311	-	Coupling protein TraD	13	54311	52008	-	IncF plasmid conjugative transfer protein TraD
15	ylpA		SRS2822480	13	54405	55142	-	Lipoprotein YlpA	13	55142	54405	-	IncF plasmid conjugative transfer surface exclusion protein TraT
15	group_3138		SRS2822480	13	55318	55875	-	hypothetical protein	13	55875	55318	-	hypothetical protein
15	group_3139		SRS2822480	13	55885	58788	-	hypothetical protein	13	58788	55885	-	hypothetical protein
15	group_3140		SRS2822480	13	58790	60151	-	hypothetical protein	13	60151	58790	-	IncF plasmid conjugative transfer pilus assembly protein TraH
15	group_3141		SRS2822480	13	60151	60762	-	hypothetical protein	13	60762	60151	-	IncF plasmid conjugative transfer protein TrbB
15	group_3142		SRS2822480	13	60784	61563	-	hypothetical protein	13	61563	60784	-	IncF plasmid conjugative transfer pilus assembly protein TraF
15	group_3143		SRS2822480	13	61560	63413	-	hypothetical protein	13	63413	61560	-	IncF plasmid conjugative transfer protein TraN
15	group_3144		SRS2822480	13	63410	64024	-	hypothetical protein	13	64024	63410	-	hypothetical protein
15	group_3145		SRS2822480	13	64021	64251	-	hypothetical protein	13	64251	64021	-	hypothetical protein
15	group_3146		SRS2822480	13	64262	65257	-	hypothetical protein	13	65257	64262	-	IncF plasmid conjugative transfer pilus assembly protein TraU
15	group_3147		SRS2822480	13	65254	65889	-	hypothetical protein	13	65889	65254	-	IncF plasmid conjugative transfer pilus assembly protein TraW
15	group_3148		SRS2822480	13	65889	66353	-	hypothetical protein	13	66353	65889	-	IncF plasmid conjugative transfer protein TrbI
15	group_3149	traC	SRS2822480	13	66350	68941	-	Protein TraC	13	68941	66350	-	IncF plasmid conjugative transfer pilus assembly protein TraC
15	traV		SRS2822480	13	68952	69566	-	Protein TraV	13	69566	68952	-	IncF plasmid conjugative transfer pilus assembly protein TraV
15	traR		SRS2822480	13	69677	69943	-	Protein TraR	13	69943	69677	-	hypothetical protein
15	group_3152		SRS2822480	13	70012	71373	-	hypothetical protein	13	71373	70012	-	IncF plasmid conjugative transfer pilus assembly protein TraB
15	group_3153		SRS2822480	13	71360	72100	-	hypothetical protein	13	72100	71360	-	IncF plasmid conjugative transfer pilus assembly protein TraK
15	group_3154		SRS2822480	13	72090	72653	-	hypothetical protein	13	72653	72090	-	IncF plasmid conjugative transfer pilus assembly protein TraE
15	group_3155		SRS2822480	13	72673	72978	-	hypothetical protein	13	72978	72673	-	IncF plasmid conjugative transfer pilus assembly protein TraL
15	traA		SRS2822480	13	72980	73339	-	Pilin	13	73339	72980	-	hypothetical protein
15	group_3157		SRS2822480	13	73456	73689	-	hypothetical protein	13	73689	73456	-	hypothetical protein
15	traJ		SRS2822480	13	73896	74345	-	Protein TraJ	13	74345	73896	-	hypothetical protein
15	traM		SRS2822480	13	74642	75025	-	Relaxosome protein TraM	13	75025	74642	-	IncF plasmid conjugative transfer mating signal transduction protein TraM
15	group_3160		SRS2822480	13	75494	75949	+	hypothetical protein	13	75494	75949	+	putative transglycosylase
15	group_3161	klcA	SRS2822480	13	75960	76490	-	Antirestriction protein KlcA	13	76490	75960	-	Antirestriction protein KlcA
15	group_3162		SRS2822480	13	77137	77970	-	hypothetical protein	13	77970	77137	-	hypothetical protein
15	group_3163		SRS2822480	13	78017	78163	-	hypothetical protein	13	78163	78017	-	hypothetical protein
15	group_3164		SRS2822480	13	78258	78605	-	hypothetical protein	13	78605	78258	-	hypothetical protein
15	group_3165		SRS2822480	13	78662	79066	-	hypothetical protein	13	79066	78662	-	Single-stranded DNA-binding protein
15	group_3166		SRS2822480	13	79792	80166	-	hypothetical protein	13	80166	79792	-	hypothetical protein
15	group_3167		SRS2822480	13	80250	80453	-	hypothetical protein	13	80453	80250	-	hypothetical protein
15	group_3168		SRS2822480	13	80521	80874	-	hypothetical protein	13	80874	80521	-	hypothetical protein
15	group_3169		SRS2822480	13	80871	81599	-	hypothetical protein	13	81599	80871	-	PsiA protein
15	group_3170	psiB	SRS2822480	13	81596	82027	-	Protein PsiB	13	82027	81596	-	PsiB protein
15	group_3171	noc	SRS2822480	13	82071	84104	-	Nucleoid occlusion protein	13	84104	82071	-	putative ParB-like nuclease
15	group_3172		SRS2822480	13	84175	84483	-	hypothetical protein	13	84483	84175	-	UPF0401 protein YkfF
15	group_3173	ssb_2	SRS2822480	13	84470	85024	-	Plasmid-derived single-stranded DNA-binding protein	13	85024	84470	-	Single-stranded DNA-binding protein
15	group_3174		SRS2822480	13	85664	85975	-	hypothetical protein	13	85975	85664	-	hypothetical protein
15	holE_2		SRS2822480	13	86016	86276	-	DNA polymerase III subunit theta	13	86276	86016	-	DNA polymerase III theta subunit
15	group_3176		SRS2822480	13	86463	86654	-	hypothetical protein	13	86654	86463	-	hypothetical protein
15	group_3177		SRS2822480	13	86697	87203	-	hypothetical protein	13	87203	86697	-	Antirestriction protein ArdA
6	group_72	ccmH_2	SRS2822480	18	5004	6047	+	Cytochrome c-type biogenesis protein CcmH	18	5004	6047	+	Cytochrome c heme lyase subunit CcmL / Cytochrome c heme lyase subunit CcmH

## Sheet: Clade III
Scoary gene group	Gene	Non-unique Gene name	Annotation	No. pos. present in	No. neg. present in	No. pos. not present in	No. neg. not present in	Sensitivity	Specificity	Odds ratio	Naïve p	Bonferroni p	Benjamini H p	Max Pairwise comparisons	Max supporting pairs	Max opposing pairs	Best pairwise comp. p	Worst pairwise comp. p	Empirical p
1	ydfB--group_1217--group_1299--group_1223--group_1229--group_1158--group_1151--group_1218--group_300--group_1289--group_615--group_1224--group_1222--group_1149--group_631--group_1157--group_1147--group_1278--group_1275--group_1155--group_1153--group_1156--group_1152--group_1226--group_1154--group_1277--group_1214--group_1146--group_1225--clpP_2--intS_4--queC_2--group_1219--group_1148	----tfaE_3--------------------intA_4------------------------------------------	putative protein YdfB--hypothetical protein--Prophage tail fiber assembly protein TfaE--hypothetical protein--hypothetical protein--hypothetical protein--hypothetical protein--hypothetical protein--hypothetical protein--hypothetical protein--hypothetical protein--hypothetical protein--Prophage integrase IntA--hypothetical protein--hypothetical protein--hypothetical protein--hypothetical protein--…	48	0	0	63	100	100	inf	1.39606e-32	1.00796e-29	2.79988e-31	1	1	0	1	1	1
2	group_205	pnbA	hypothetical protein	48	1	0	62	100	98.4127	inf	6.84071e-31	4.93899e-28	1.04047e-29	1	1	0	1	1	0.5
3	group_1279--group_1280	--	hypothetical protein--hypothetical protein	48	1	0	62	100	98.4127	inf	6.84071e-31	4.93899e-28	1.04047e-29	1	1	0	1	1	0.34375
4	group_119		hypothetical protein	48	2	0	61	100	96.8254	inf	1.71018e-29	1.23475e-26	1.87083e-28	1	1	0	1	1	0.71875
5	group_1281--xerD_3--group_94	----	hypothetical protein--Tyrosine recombinase XerD--hypothetical protein	48	2	0	61	100	96.8254	inf	1.71018e-29	1.23475e-26	1.87083e-28	1	1	0	1	1	0.3125
6	group_381		hypothetical protein	48	3	0	60	100	95.2381	inf	2.9073e-28	2.09907e-25	2.41273e-27	1	1	0	1	1	0.0594059
7	group_301		hypothetical protein	48	3	0	60	100	95.2381	inf	2.9073e-28	2.09907e-25	2.41273e-27	1	1	0	1	1	0.90625
8	group_382		hypothetical protein	48	4	0	59	100	93.6508	inf	3.77949e-27	2.72879e-24	2.84249e-26	1	1	0	1	1	0.53125
9	group_390		hypothetical protein	48	5	0	58	100	92.0635	inf	4.00626e-26	2.89252e-23	2.78127e-25	1	1	0	1	1	0.46875
10	group_1297		hypothetical protein	48	5	0	58	100	92.0635	inf	4.00626e-26	2.89252e-23	2.78127e-25	1	1	0	1	1	0.5625
11	mutT3--group_703--group_1296--group_391--group_1290--group_702--group_1298	------------	Putative 8-oxo-dGTP diphosphatase 3--hypothetical protein--hypothetical protein--hypothetical protein--hypothetical protein--hypothetical protein--hypothetical protein	48	7	0	56	100	88.8889	inf	2.833e-24	2.04543e-21	1.56139e-23	1	1	0	1	1	0.46875
12	group_700		hypothetical protein	48	8	0	55	100	87.3016	inf	2.2664e-23	1.63634e-20	1.14429e-22	1	1	0	1	1	0.375
13	group_701		hypothetical protein	48	8	0	55	100	87.3016	inf	2.2664e-23	1.63634e-20	1.14429e-22	1	1	0	1	1	0.128713
14	group_7880		hypothetical protein	48	10	0	53	100	84.127	inf	7.47088e-22	5.39397e-19	3.43565e-21	1	1	0	1	1	0.78125
15	group_475		hypothetical protein	48	12	0	51	100	80.9524	inf	2.81979e-20	2.03589e-17	1.06591e-19	1	1	0	1	1	0.00990099
16	ycdX		putative phosphatase YcdX	48	37	0	26	100	41.2698	inf	2.72038e-08	1.96412e-05	7.16831e-08	1	1	0	1	1	0.019802
17	dinI_4		DNA damage-inducible protein I	48	44	0	19	100	30.1587	inf	5.66729e-06	0.00409178	1.33283e-05	1	1	0	1	1	0.019802
18	group_1129--group_1125--intA_2--group_1135--group_1134--group_1140--group_1139--group_1119--group_3542--group_1122--group_1137--group_602--group_1138--group_1130--group_1124--group_601--group_1131	--------------------------------	hypothetical protein--hypothetical protein--Prophage integrase IntA--hypothetical protein--hypothetical protein--hypothetical protein--hypothetical protein--hypothetical protein--hypothetical protein--hypothetical protein--hypothetical protein--hypothetical protein--hypothetical protein--hypothetical protein--hypothetical protein--hypothetical protein--hypothetical protein	47	0	1	63	97.9167	100	inf	8.9348e-31	6.45093e-28	1.04047e-29	1	1	0	1	1	0.28125
19	group_1227		hypothetical protein	47	0	1	63	97.9167	100	inf	8.9348e-31	6.45093e-28	1.04047e-29	1	1	0	1	1	1
20	xerC_1		Tyrosine recombinase XerC	47	0	1	63	97.9167	100	inf	8.9348e-31	6.45093e-28	1.04047e-29	1	1	0	1	1	0.65625
21	group_1215		hypothetical protein	47	0	1	63	97.9167	100	inf	8.9348e-31	6.45093e-28	1.04047e-29	1	1	0	1	1	0.5625
22	group_1072--group_1065--group_537--group_1067--group_536--yejK_1--group_1066--group_1064--group_1071	----------------	hypothetical protein--hypothetical protein--hypothetical protein--hypothetical protein--hypothetical protein--Nucleoid-associated protein YejK--hypothetical protein--hypothetical protein--hypothetical protein	47	1	1	62	97.9167	98.4127	2914	4.22309e-29	3.04907e-26	3.58714e-28	1	1	1	1	1	0.59375
23	dam_4		DNA adenine methylase	47	1	1	62	97.9167	98.4127	2914	4.22309e-29	3.04907e-26	3.58714e-28	1	1	1	1	1	0.28125
24	group_1069--group_1070--group_538	rusA--dam_1--	Crossover junction endodeoxyribonuclease RusA--DNA adenine methylase--hypothetical protein	47	2	1	61	97.9167	96.8254	1433.5	1.01858e-27	7.35416e-25	7.74122e-27	1	1	1	1	1	0.28125
25	group_535		hypothetical protein	47	2	1	61	97.9167	96.8254	1433.5	1.01858e-27	7.35416e-25	7.74122e-27	1	1	1	1	1	0.108911
26	group_237		hypothetical protein	47	4	1	59	97.9167	93.6508	693.25	2.09616e-25	1.51343e-22	1.37585e-24	1	1	1	1	1	0.039604
27	dnaJ_2--ylcG_2	--	hypothetical protein--putative protein YlcG	47	4	1	59	97.9167	93.6508	693.25	2.09616e-25	1.51343e-22	1.37585e-24	1	1	1	1	1	0.46875
28	group_129		hypothetical protein	47	5	1	58	97.9167	92.0635	545.2	2.14448e-24	1.54832e-21	1.2796e-23	1	1	1	1	1	0.029703
29	group_1075		putative HTH-type transcriptional regulator	47	5	1	58	97.9167	92.0635	545.2	2.14448e-24	1.54832e-21	1.2796e-23	1	1	1	1	1	0.039604
30	group_540		hypothetical protein	47	6	1	57	97.9167	90.4762	446.5	1.86291e-23	1.34502e-20	9.67642e-23	1	1	1	1	1	0.029703
31	group_658--rrrD_2	--	hypothetical protein--Lysozyme RrrD	47	7	1	56	97.9167	88.8889	376	2.66886e-22	1.92691e-19	1.24317e-21	1	1	1	1	1	0.1875
32	group_394		hypothetical protein	47	7	1	56	97.9167	88.8889	376	2.66886e-22	1.92691e-19	1.24317e-21	1	1	1	1	1	0.4375
33	group_1291--group_392	--	hypothetical protein--hypothetical protein	47	7	1	56	97.9167	88.8889	376	2.66886e-22	1.92691e-19	1.24317e-21	1	1	1	1	1	0.4375
34	pliG		Inhibitor of g-type lysozyme	47	8	1	55	97.9167	87.3016	323.125	9.74552e-22	7.03626e-19	4.39766e-21	1	1	1	1	1	0.25
35	group_539--group_1073	--	hypothetical protein--hypothetical protein	47	8	1	55	97.9167	87.3016	323.125	9.74552e-22	7.03626e-19	4.39766e-21	1	1	1	1	1	0.00990099
36	group_1250		hypothetical protein	47	10	1	53	97.9167	84.127	249.1	5.60042e-20	4.04351e-17	2.10599e-19	1	1	1	1	1	0.21875
37	group_146		hypothetical protein	47	11	1	52	97.9167	82.5397	222.182	1.72777e-19	1.24745e-16	6.39717e-19	1	1	1	1	1	0.53125
38	rpsT		30S ribosomal protein S20	47	42	1	21	97.9167	33.3333	23.5	1.96913e-05	0.0142171	4.38799e-05	1	1	1	1	1	0.00990099
39	group_273		hypothetical protein	46	0	2	63	95.8333	100	inf	2.90381e-29	2.09655e-26	2.7954e-28	1	1	0	1	1	0.195122
40	group_1123		hypothetical protein	46	0	2	63	95.8333	100	inf	2.90381e-29	2.09655e-26	2.7954e-28	1	1	0	1	1	0.210526
41	group_145		hypothetical protein	46	0	2	63	95.8333	100	inf	2.90381e-29	2.09655e-26	2.7954e-28	1	1	0	1	1	0.188679
42	group_1127--group_1126--group_1128	----	hypothetical protein--hypothetical protein--hypothetical protein	46	0	2	63	95.8333	100	inf	2.90381e-29	2.09655e-26	2.7954e-28	1	1	0	1	1	0.28125
43	group_1293		hypothetical protein	46	0	2	63	95.8333	100	inf	2.90381e-29	2.09655e-26	2.7954e-28	1	1	0	1	1	0.5625
44	group_1239		hypothetical protein	46	0	2	63	95.8333	100	inf	2.90381e-29	2.09655e-26	2.7954e-28	1	1	0	1	1	0.4375
45	group_706		hypothetical protein	46	2	2	61	95.8333	96.8254	701.5	3.07973e-26	2.22356e-23	2.24602e-25	1	1	1	1	1	0.40625
46	group_348		hypothetical protein	46	2	2	61	95.8333	96.8254	701.5	3.07973e-26	2.22356e-23	2.24602e-25	1	1	1	1	1	0.029703
47	group_1074		hypothetical protein	46	4	2	59	95.8333	93.6508	339.25	5.9004e-24	4.26009e-21	3.22734e-23	1	1	1	1	1	0.019802
48	group_120		hypothetical protein	46	7	2	56	95.8333	88.8889	184	4.30424e-21	3.10766e-18	1.81351e-20	1	1	1	1	1	0.194444
49	group_393--group_1294--group_704--group_1292	------	hypothetical protein--hypothetical protein--hypothetical protein--hypothetical protein	46	7	2	56	95.8333	88.8889	184	4.30424e-21	3.10766e-18	1.81351e-20	1	1	1	1	1	0.3125
50	noc		Nucleoid occlusion protein	45	0	3	63	93.75	100	inf	6.38839e-28	4.61241e-25	5.06859e-27	1	1	0	1	1	0.3125
51	group_1212		hypothetical protein	45	0	3	63	93.75	100	inf	6.38839e-28	4.61241e-25	5.06859e-27	1	1	0	1	1	0.25
52	group_603		hypothetical protein	45	0	3	63	93.75	100	inf	6.38839e-28	4.61241e-25	5.06859e-27	1	1	0	1	1	0.5
53	ycfH_2		putative metal-dependent hydrolase YcfH	45	0	3	63	93.75	100	inf	6.38839e-28	4.61241e-25	5.06859e-27	1	1	0	1	1	0.21875
54	group_1009		hypothetical protein	45	17	3	46	93.75	73.0159	40.5882	2.94939e-13	2.12946e-10	9.90448e-13	1	1	1	1	1	0.118812
55	ccmH_3		Cytochrome c-type biogenesis protein CcmH	45	25	3	38	93.75	60.3175	22.8	1.0657e-09	7.69436e-07	2.83925e-09	1	1	1	1	1	0.00990099
56	ccmH_1		Cytochrome c-type biogenesis protein CcmH	45	32	3	31	93.75	49.2063	14.5312	7.41374e-07	0.000535272	1.80835e-06	1	1	1	1	1	0.00990099
57	group_1216		hypothetical protein	44	0	4	63	91.6667	100	inf	1.07005e-26	7.72579e-24	7.96474e-26	1	1	0	1	1	0.25
58	group_705--group_1295	--	hypothetical protein--hypothetical protein	44	2	4	61	91.6667	96.8254	335.5	9.8108e-24	7.0834e-21	5.28612e-23	1	1	1	1	1	0.46875
59	group_234		hypothetical protein	43	0	5	63	89.5833	100	inf	1.45527e-25	1.05071e-22	9.91234e-25	1	1	0	1	1	0.029703
60	group_1133		hypothetical protein	43	0	5	63	89.5833	100	inf	1.45527e-25	1.05071e-22	9.91234e-25	1	1	0	1	1	0.039604
61	group_1110--group_136--group_1104--group_2373	------	hypothetical protein--hypothetical protein--hypothetical protein--hypothetical protein	43	3	5	60	89.5833	95.2381	172	1.76027e-21	1.27091e-18	7.6561e-21	1	1	1	1	1	0.019802
62	group_1113--dam_2--ybiI_2--group_1118--group_1114--group_1116--group_596--group_1117--group_1115	----------------	hypothetical protein--DNA adenine methylase--putative protein YbiI--hypothetical protein--hypothetical protein--hypothetical protein--hypothetical protein--hypothetical protein--hypothetical protein	43	4	5	59	89.5833	93.6508	126.85	1.91302e-20	1.3812e-17	7.46594e-20	1	1	1	1	1	0.019802
63	group_1111		hypothetical protein	43	13	5	50	89.5833	79.3651	33.0769	1.1852e-13	8.55715e-11	4.01744e-13	1	1	1	1	1	0.049505
64	dinI_3		DNA damage-inducible protein I	43	14	5	49	89.5833	77.7778	30.1	5.30281e-13	3.82863e-10	1.58208e-12	1	1	1	1	1	0.029703
65	xerH		Tyrosine recombinase XerH	43	14	5	49	89.5833	77.7778	30.1	5.30281e-13	3.82863e-10	1.58208e-12	1	1	1	1	1	0.00990099
66	group_1220		hypothetical protein	42	0	6	63	87.5	100	inf	1.67357e-24	1.20831e-21	1.01539e-23	1	1	0	1	1	0.0891089
67	group_1136		hypothetical protein	41	0	7	63	85.4167	100	inf	1.67357e-23	1.20831e-20	8.81981e-23	1	1	0	1	1	0.049505
68	group_1132		hypothetical protein	41	0	7	63	85.4167	100	inf	1.67357e-23	1.20831e-20	8.81981e-23	1	1	0	1	1	0.029703
69	group_117		hypothetical protein	41	0	7	63	85.4167	100	inf	1.67357e-23	1.20831e-20	8.81981e-23	1	1	0	1	1	0.0891089
70	dinI_5		DNA damage-inducible protein I	41	2	7	61	85.4167	96.8254	178.643	1.22871e-20	8.87128e-18	5.0405e-20	1	1	1	1	1	0.039604
71	group_1221		hypothetical protein	40	0	8	63	83.3333	100	inf	1.48529e-22	1.07238e-19	7.14919e-22	1	1	0	1	1	0.049505
72	spo0C		Chromosome-partitioning protein Spo0J	39	0	9	63	81.25	100	inf	1.18823e-21	8.57903e-19	5.2957e-21	1	1	0	1	1	0.0792079
73	group_600		hypothetical protein	39	0	9	63	81.25	100	inf	1.18823e-21	8.57903e-19	5.2957e-21	1	1	0	1	1	0.039604
74	sadA		Autotransporter adhesin SadA	37	63	11	0	77.0833	0	0	4.77458e-05	0.0344724	0.000103833	1	0	1	1	1	0.029703
75	group_1312		hypothetical protein	36	20	12	43	75	68.254	6.45	8.14139e-06	0.00587808	1.90847e-05	1	1	1	1	1	0.00990099
76	ccmB		Heme exporter protein B	36	63	12	0	75	0	0	1.76659e-05	0.0127548	3.96112e-05	1	0	1	1	1	0.00990099
77	group_630		hypothetical protein	31	0	17	63	64.5833	100	inf	1.41686e-15	1.02297e-12	5.01458e-15	1	1	0	1	1	0.029703
78	group_838		hypothetical protein	31	6	17	57	64.5833	90.4762	17.3235	8.49037e-10	6.13004e-07	2.27039e-09	1	1	1	1	1	0.039604
79	group_1274		hypothetical protein	30	0	18	63	62.5	100	inf	6.37588e-15	4.60338e-12	2.21316e-14	1	1	0	1	1	0.019802
80	group_1213		hypothetical protein	30	0	18	63	62.5	100	inf	6.37588e-15	4.60338e-12	2.21316e-14	1	1	0	1	1	0.00990099
81	group_1501		hypothetical protein	30	3	18	60	62.5	95.2381	33.3333	1.66614e-11	1.20295e-08	4.73602e-11	1	1	1	1	1	0.00990099
82	group_405		hypothetical protein	29	1	19	62	60.4167	98.4127	94.6316	6.40608e-13	4.62519e-10	1.90337e-12	1	1	1	1	1	0.00990099
83	smc--group_1029--ziaA--bmaC--hflK_1--group_1040--group_1021--group_1028--group_1033--group_521--group_1039--group_1027--group_1031--group_1034--hflC_1--uvrD_1--group_1024--bamA_1--group_1038--group_1044--syrM1--fadL_1--group_524--group_1035	--------------------yjcS--------------------------	Chromosome partition protein Smc--hypothetical protein--Zinc-transporting ATPase--Adhesin BmaC autotransporter--Modulator of FtsH protease HflK--hypothetical protein--hypothetical protein--hypothetical protein--hypothetical protein--hypothetical protein--Putative alkyl/aryl-sulfatase YjcS--hypothetical protein--hypothetical protein--hypothetical protein--Modulator of FtsH protease HflC--DNA helic…	27	0	21	63	56.25	100	inf	4.56781e-13	3.29796e-10	1.37415e-12	1	1	0	1	1	0.75
84	group_1026--group_1025	--	hypothetical protein--hypothetical protein	27	1	21	62	56.25	98.4127	79.7143	9.7066e-12	7.00817e-09	2.77003e-11	1	1	1	1	1	0.40625
85	group_1048--group_1047	--	hypothetical protein--hypothetical protein	26	0	22	63	54.1667	100	inf	1.76484e-12	1.27421e-09	5.07654e-12	1	1	0	1	1	0.5
86	group_1045--group_1046	--	hypothetical protein--hypothetical protein	26	0	22	63	54.1667	100	inf	1.76484e-12	1.27421e-09	5.07654e-12	1	1	0	1	1	0.40625
87	group_236		hypothetical protein	26	1	22	62	54.1667	98.4127	73.2727	3.57743e-11	2.5829e-08	9.6377e-11	1	1	1	1	1	0.00990099
88	ldrD		Small toxic polypeptide LdrD	22	63	26	0	45.8333	0	0	1.76484e-12	1.27421e-09	5.07654e-12	1	0	1	1	1	0.00990099
89	group_1999		hypothetical protein	18	0	30	63	37.5	100	inf	3.07083e-08	2.21714e-05	8.06233e-08	1	1	0	1	1	0.40625
90	group_836--group_2019--group_2022--group_837--group_2021--group_445--group_2017--group_2024--mltD_1--group_2020--group_2023	--------------------	hypothetical protein--hypothetical protein--hypothetical protein--hypothetical protein--hypothetical protein--hypothetical protein--hypothetical protein--hypothetical protein--Membrane-bound lytic murein transglycosylase D--hypothetical protein--hypothetical protein	18	3	30	60	37.5	95.2381	12	1.47046e-05	0.0106167	3.30739e-05	1	1	1	1	1	0.0891089
91	group_1392		hypothetical protein	18	3	30	60	37.5	95.2381	12	1.47046e-05	0.0106167	3.30739e-05	1	1	1	1	1	0.0594059
92	group_1398--dnaT_2	--	hypothetical protein--Primosomal protein 1	18	53	30	10	37.5	15.873	0.113208	4.50987e-07	0.000325612	1.10377e-06	1	1	1	1	1	0.195652
93	group_422--group_421--cph2--group_1397--yjcS--group_755	----------	hypothetical protein--hypothetical protein--Phytochrome-like protein cph2--hypothetical protein--Putative alkyl/aryl-sulfatase YjcS--hypothetical protein	18	54	30	9	37.5	14.2857	0.1	2.28209e-07	0.000164767	5.74102e-07	1	1	1	1	1	0.108911
94	group_2001--cotSA_1--group_2026--group_2000--group_2025	recE_2--------tfaE_2	Exodeoxyribonuclease 8--Spore coat protein SA--hypothetical protein--hypothetical protein--Prophage tail fiber assembly protein TfaE	17	0	31	63	35.4167	100	inf	9.31155e-08	6.72294e-05	2.40105e-07	1	1	0	1	1	0.53125
95	group_352	flp	hypothetical protein	17	1	31	62	35.4167	98.4127	34	1.15404e-06	0.000833216	2.73185e-06	1	1	1	1	1	0.2
96	group_32--group_2002	--	hypothetical protein--hypothetical protein	17	1	31	62	35.4167	98.4127	34	1.15404e-06	0.000833216	2.73185e-06	1	1	1	1	1	0.2
97	group_1394--ydfB_1	--	hypothetical protein--putative protein YdfB	17	1	31	62	35.4167	98.4127	34	1.15404e-06	0.000833216	2.73185e-06	1	1	1	1	1	0.21875
98	group_2003		hypothetical protein	17	3	31	60	35.4167	95.2381	10.9677	3.67669e-05	0.0265457	8.0686e-05	1	1	1	1	1	0.0990099
99	group_2762		hypothetical protein	17	3	31	60	35.4167	95.2381	10.9677	3.67669e-05	0.0265457	8.0686e-05	1	1	1	1	1	0.00990099
100	group_2028		hypothetical protein	17	3	31	60	35.4167	95.2381	10.9677	3.67669e-05	0.0265457	8.0686e-05	1	1	1	1	1	0.00990099
101	group_2007--rrrD_1--group_2008--group_2004--group_2005	--------	hypothetical protein--Lysozyme RrrD--hypothetical protein--hypothetical protein--hypothetical protein	16	0	32	63	33.3333	100	inf	2.76437e-07	0.000199587	6.83518e-07	1	1	0	1	1	0.21875
102	group_2015--group_2014	--	hypothetical protein--hypothetical protein	16	2	32	61	33.3333	96.8254	15.25	3.0529e-05	0.0220419	6.76132e-05	1	1	1	1	1	0.128713
103	group_191		hypothetical protein	15	0	33	63	31.25	100	inf	8.0418e-07	0.000580618	1.94187e-06	1	1	0	1	1	0.00990099
104	group_2010--group_2009	--	putative protein--hypothetical protein	15	0	33	63	31.25	100	inf	8.0418e-07	0.000580618	1.94187e-06	1	1	0	1	1	0.28125
105	group_228		hypothetical protein	15	48	33	15	31.25	23.8095	0.142045	2.70122e-06	0.00195028	6.37348e-06	1	1	1	1	1	0.00990099
106	group_2376		hypothetical protein	11	0	37	63	22.9167	100	inf	4.77458e-05	0.0344724	0.000103833	1	1	0	1	1	0.00990099
107	group_2941		hypothetical protein	11	0	37	63	22.9167	100	inf	4.77458e-05	0.0344724	0.000103833	1	1	0	1	1	0.00990099
108	sadA_1		Autotransporter adhesin SadA	11	58	37	5	22.9167	7.93651	0.0256291	2.59665e-14	1.87478e-11	8.88523e-14	1	1	1	1	1	0.00990099
109	group_403		hypothetical protein	7	58	41	5	14.5833	7.93651	0.0147183	1.35126e-17	9.75613e-15	4.90258e-17	1	1	1	1	1	0.00990099
110	group_235		hypothetical protein	5	53	43	10	10.4167	15.873	0.0219394	2.32331e-15	1.67743e-12	8.18258e-15	1	1	1	1	1	0.00990099
111	group_772		hypothetical protein	2	54	46	9	4.16667	14.2857	0.00724638	1.43493e-19	1.03602e-16	5.36799e-19	1	1	1	1	1	0.21875
112	group_771		hypothetical protein	2	57	46	6	4.16667	9.52381	0.00457666	4.88441e-22	3.52655e-19	2.26061e-21	1	1	1	1	1	0.0693069
113	recE_2		Exodeoxyribonuclease 8	2	60	46	3	4.16667	4.7619	0.00217391	4.87404e-25	3.51906e-22	2.98225e-24	1	1	1	1	1	0.0693069
114	bsdD		Phenolic acid decarboxylase subunit D	2	63	46	0	4.16667	0	0	2.90381e-29	2.09655e-26	2.7954e-28	1	0	1	1	1	0.5625
115	group_1547		hypothetical protein	1	21	47	42	2.08333	66.6667	0.0425532	1.96913e-05	0.0142171	4.38799e-05	1	1	1	1	1	0.00990099
116	group_88	icsA_2	hypothetical protein	1	25	47	38	2.08333	60.3175	0.0323404	8.62379e-07	0.000622638	2.07546e-06	1	1	1	1	1	0.00990099
117	group_1395		hypothetical protein	1	52	47	11	2.08333	17.4603	0.00450082	1.72777e-19	1.24745e-16	6.39717e-19	1	1	1	1	1	0.175439
118	group_420		hypothetical protein	1	57	47	6	2.08333	9.52381	0.00223964	1.86291e-23	1.34502e-20	9.67642e-23	1	1	1	1	1	0.3125
119	group_736		hypothetical protein	1	59	47	4	2.08333	6.34921	0.00144248	2.09616e-25	1.51343e-22	1.37585e-24	1	1	1	1	1	0.21875
120	group_1372--group_1371	--	hypothetical protein--hypothetical protein	1	63	47	0	2.08333	0	0	8.9348e-31	6.45093e-28	1.04047e-29	1	0	1	1	1	1
121	group_2391		hypothetical protein	0	18	48	45	0	71.4286	0	1.20291e-05	0.00868502	2.81069e-05	1	0	1	1	1	0.019802
122	group_740	dinI_4	DNA damage-inducible protein I	0	23	48	40	0	63.4921	0	3.78966e-07	0.000273613	9.33833e-07	1	0	1	1	1	0.00990099
123	group_90		hypothetical protein	0	24	48	39	0	61.9048	0	1.57352e-07	0.000113608	4.04299e-07	1	0	1	1	1	0.00990099
124	group_246	ycdX	putative phosphatase YcdX	0	27	48	36	0	57.1429	0	1.12929e-08	8.15347e-06	2.98662e-08	1	0	1	1	1	0.00990099
125	group_1366		hypothetical protein	0	29	48	34	0	53.9683	0	1.91719e-09	1.38421e-06	5.08901e-09	1	0	1	1	1	0.00990099
126	group_1365		hypothetical protein	0	32	48	31	0	49.2063	0	1.85495e-10	1.33927e-07	4.97872e-10	1	0	1	1	1	0.039604
127	group_1353--group_1358--group_1354--group_1355--group_1360--group_1356--group_1357--group_1359--group_1361	dam_2----ybiI_2----xerH--------	DNA adenine methylase--hypothetical protein--putative protein YbiI--hypothetical protein--Tyrosine recombinase XerH--hypothetical protein--hypothetical protein--hypothetical protein--hypothetical protein	0	34	48	29	0	46.0317	0	2.26728e-11	1.63697e-08	6.13099e-11	1	0	1	1	1	0.00990099
128	group_1352--group_1351--group_1350--group_1349	dinI_3------	DNA damage-inducible protein I--hypothetical protein--hypothetical protein--hypothetical protein	0	34	48	29	0	46.0317	0	2.26728e-11	1.63697e-08	6.13099e-11	1	0	1	1	1	0.039604
129	group_729		hypothetical protein	0	37	48	26	0	41.2698	0	9.72867e-13	7.0241e-10	2.85532e-12	1	0	1	1	1	0.019802
130	group_158		hypothetical protein	0	37	48	26	0	41.2698	0	9.72867e-13	7.0241e-10	2.85532e-12	1	0	1	1	1	0.029703
131	group_1364		hypothetical protein	0	37	48	26	0	41.2698	0	9.72867e-13	7.0241e-10	2.85532e-12	1	0	1	1	1	0.029703
132	group_1363		hypothetical protein	0	38	48	25	0	39.6825	0	3.34435e-13	2.41462e-10	1.11788e-12	1	0	1	1	1	0.00990099
133	group_410		hypothetical protein	0	39	48	24	0	38.0952	0	1.94404e-13	1.40359e-10	6.55885e-13	1	0	1	1	1	0.0891089
134	group_824		hypothetical protein	0	40	48	23	0	36.5079	0	5.36897e-14	3.87639e-11	1.82849e-13	1	0	1	1	1	0.00990099
135	group_409		hypothetical protein	0	41	48	22	0	34.9206	0	1.51039e-14	1.0905e-11	5.19287e-14	1	0	1	1	1	0.108911
136	mobA_2		Mobilization protein A	0	41	48	22	0	34.9206	0	1.51039e-14	1.0905e-11	5.19287e-14	1	0	1	1	1	0.0693069
137	group_730		hypothetical protein	0	42	48	21	0	33.3333	0	4.30721e-15	3.1098e-12	1.50961e-14	1	0	1	1	1	0.8125
138	group_1370--group_1368--group_1369--intA_3	------	hypothetical protein--hypothetical protein--hypothetical protein--Prophage integrase IntA	0	43	48	20	0	31.746	0	1.23257e-15	8.89917e-13	4.38383e-15	1	0	1	1	1	0.171429
139	group_742--group_1380	--	hypothetical protein--hypothetical protein	0	47	48	16	0	25.3968	0	8.44483e-18	6.09717e-15	3.07938e-17	1	0	1	1	1	0.8125
140	group_412		hypothetical protein	0	48	48	15	0	23.8095	0	1.87469e-18	1.35352e-15	6.90574e-18	1	0	1	1	1	0.25
141	group_407--group_718--rusA--group_787	------	hypothetical protein--hypothetical protein--Crossover junction endodeoxyribonuclease RusA--hypothetical protein	0	51	48	12	0	19.0476	0	2.81979e-20	2.03589e-17	1.06591e-19	1	0	1	1	1	0.029703
142	group_7882		hypothetical protein	0	51	48	12	0	19.0476	0	2.81979e-20	2.03589e-17	1.06591e-19	1	0	1	1	1	0.0891089
143	group_1879--group_443	--	hypothetical protein--hypothetical protein	0	52	48	11	0	17.4603	0	4.39563e-21	3.17364e-18	1.81351e-20	1	0	1	1	1	0.00990099
144	group_1348--group_378	"--fruA_3"	hypothetical protein--PTS system fructose-specific EIIB'BC component	0	52	48	11	0	17.4603	0	4.39563e-21	3.17364e-18	1.81351e-20	1	0	1	1	1	0.78125
145	group_1383--group_743--malS_1--group_1381--group_1382--group_417	----------	hypothetical protein--hypothetical protein--Periplasmic alpha-amylase--hypothetical protein--hypothetical protein--hypothetical protein	0	54	48	9	0	14.2857	0	1.25957e-22	9.09409e-20	6.10341e-22	1	0	1	1	1	0.625
146	group_744		hypothetical protein	0	55	48	8	0	12.6984	0	2.2664e-23	1.63634e-20	1.14429e-22	1	0	1	1	1	0.4375
147	group_160		hypothetical protein	0	55	48	8	0	12.6984	0	2.2664e-23	1.63634e-20	1.14429e-22	1	0	1	1	1	0.0693069
148	group_746--traC--group_162	----	hypothetical protein--DNA primase TraC--hypothetical protein	0	56	48	7	0	11.1111	0	2.833e-24	2.04543e-21	1.56139e-23	1	0	1	1	1	0.28125
149	group_416--group_1384	intA_1--	Prophage integrase IntA--hypothetical protein	0	57	48	6	0	9.52381	0	3.60564e-25	2.60327e-22	2.22502e-24	1	0	1	1	1	0.28125
150	group_389--group_750--group_734--intQ--group_96	--------	hypothetical protein--hypothetical protein--hypothetical protein--Putative defective protein IntQ--hypothetical protein	0	57	48	6	0	9.52381	0	3.60564e-25	2.60327e-22	2.22502e-24	1	0	1	1	1	0.21875
151	group_741		hypothetical protein	0	58	48	5	0	7.93651	0	4.00626e-26	2.89252e-23	2.78127e-25	1	0	1	1	1	0.25
152	group_335		hypothetical protein	0	58	48	5	0	7.93651	0	4.00626e-26	2.89252e-23	2.78127e-25	1	0	1	1	1	0.5
153	group_159		hypothetical protein	0	58	48	5	0	7.93651	0	4.00626e-26	2.89252e-23	2.78127e-25	1	0	1	1	1	0.21875
154	group_731		hypothetical protein	0	62	48	1	0	1.5873	0	6.84071e-31	4.93899e-28	1.04047e-29	1	0	1	1	1	0.34375
155	group_1387--group_1386	--	hypothetical protein--hypothetical protein	0	63	48	0	0	0	0	1.39606e-32	1.00796e-29	2.79988e-31	1	0	1	1	1	1

## Sheet: Clade III - Detailed Summary
Scoary Gene Group	Gene	Gene name	Isolate	Prokka Annotation					RASTtk Annotation					MGE Region
				Contig	Start	Stop	Strand	Product	Contig	Start	Stop	Strand	Function
56	ccmH_1		SRS3010019	1	39	620	+	Cytochrome c-type biogenesis protein CcmH	1	3	620	+	Cytochrome c heme lyase subunit CcmL / Cytochrome c heme lyase subunit CcmH
15	group_475		SRS3010019	1	25795	25941	+	hypothetical protein	1	25795	25941	+	hypothetical protein
54	group_1009		SRS3010019	1	106264	106698	+	hypothetical protein	1	106264	106698	+	hypothetical protein
81	group_1501		SRS3010019	1	246605	246709	+	hypothetical protein	1	246605	246709	+	Arginine/lysine/ornithine decarboxylase
2	group_205	pnbA	SRS3010019	1	639123	639776	+	hypothetical protein	1	639108	639776	+	Putative esterase
83	group_1021		SRS3010019	1	727239	728681	+	hypothetical protein	1	727239	728681	+	Mobile element protein	Potential MGE
83	group_521		SRS3010019	1	729009	730112	+	hypothetical protein	1	729009	730112	+	Mobile element protein
83	uvrD_1		SRS3010019	1	730365	731945	-	DNA helicase II	1	731945	730365	-	ATP-dependent DNA helicase
83	smc		SRS3010019	1	732092	733945	-	Chromosome partition protein Smc- protein	1	733945	732092	-	hypothetical protein
83	group_1024		SRS3010019	1	734396	734560	+	hypothetical protein	1	734396	734560	+	hypothetical protein
84	group_1025		SRS3010019	1	734598	734882	+	hypothetical protein	1	734598	734882	+	Mobile element protein
84	group_1026		SRS3010019	1	734924	735733	+	hypothetical protein	1	734924	735733	+	Transposase
83	group_1027		SRS3010019	1	735743	736270	+	hypothetical protein	1	735743	736270	+	hypothetical protein
83	group_1028		SRS3010019	1	736436	736750	+	hypothetical protein	1	736436	736750	+	hypothetical protein
83	group_1029		SRS3010019	1	736798	737667	+	hypothetical protein	1	736798	737667	+	hypothetical protein
83	syrM1		SRS3010019	1	737686	738582	+	HTH-type transcriptional regulator SyrM 1	1	737686	738582	+	hypothetical protein
83	group_1031		SRS3010019	1	738770	739252	+	hypothetical protein	1	738770	739252	+	hypothetical protein
83	fadL_1		SRS3010019	1	739299	740486	-	Long-chain fatty acid transport protein	1	740486	739299	-	Long-chain fatty acid transport protein
83	group_1033		SRS3010019	1	740516	741622	-	hypothetical protein	1	741622	740516	-	corresponds to STY3950 from Accession AL513382: Salmonella typhi CT18
83	group_1034		SRS3010019	1	741623	742753	-	hypothetical protein	1	742753	741623	-	Outer membrane protein/protective antigen OMA87
83	group_1035		SRS3010019	1	742753	743691	-	hypothetical protein	1	743691	742753	-	hypothetical protein
83	bamA_1		SRS3010019	1	743704	744831	-	Outer membrane protein assembly factor BamA	1	744831	743704	-	Outer membrane protein/protective antigen OMA87
83	bmaC		SRS3010019	1	744939	754625	-	Adhesin BmaC autotransporter	1	754625	744939	-	hypothetical protein
83	group_1038		SRS3010019	1	754730	754834	-	hypothetical protein	1	754834	754730	-	hypothetical protein
83	group_1039	yjcS	SRS3010019	1	755342	757318	+	Putative alkyl/aryl-sulfatase YjcS	1	755342	757318	+	Putative alkyl/aryl-sulfatase YjcS
83	group_1040		SRS3010019	1	757465	759342	+	hypothetical protein	1	757465	759342	+	hypothetical protein
83	hflC_1		SRS3010019	1	759370	760368	+	Modulator of FtsH protease HflC	1	759370	760368	+	HflC protein paralog among fluorescent psuedomonads
83	hflK_1		SRS3010019	1	760365	761447	+	Modulator of FtsH protease HflK	1	760365	761447	+	HflK protein
83	ziaA		SRS3010019	1	761444	763357	+	Zinc-transporting ATPase	1	761444	763357	+	Lead, cadmium, zinc and mercury transporting ATPase (EC 3.6.3.3) (EC 3.6.3.5); Copper-translocating P-type ATPase (EC 3.6.3.4)
83	group_1044		SRS3010019	1	763531	764484	+	hypothetical protein	1	763531	764484	+	hypothetical protein
86	group_1045		SRS3010019	1	764653	764859	-	hypothetical protein	1	764859	764653	-	Transcriptional regulator, Xre family
86	group_1046		SRS3010019	1	764961	765122	+	hypothetical protein	1	764961	765122	+	hypothetical protein
83	group_524		SRS3010019	1	765116	765619	-	hypothetical protein	1	765619	765116	-	IS1 protein InsB
85	group_1047		SRS3010019	1	765998	766306	+	hypothetical protein	1	765998	766306	+	hypothetical protein
85	group_1048		SRS3010019	1	766303	767712	+	hypothetical protein	1	766303	767712	+	GGDEF domain protein
75	group_1312		SRS3010019	1	1082149	1082307	+	hypothetical protein	1	1082250	1082125	-	hypothetical protein	Prophage Region 3
59	group_234		SRS3010019	1	1103368	1103859	-	hypothetical protein	1	1103859	1103368	-	hypothetical protein
22	group_1064		SRS3010019	1	1104158	1104400	-	hypothetical protein	1	1104400	1104158	-	hypothetical protein
22	group_1065		SRS3010019	1	1104546	1105085	-	hypothetical protein	1	1105085	1104546	-	Uncharacterized protein RzpQ
22	group_1066		SRS3010019	1	1105082	1105696	-	hypothetical protein	1	1105696	1105082	-	Lytic enzyme
25	group_535		SRS3010019	1	1105696	1105977	-	hypothetical protein	1	1105977	1105696	-	Putative prophage membrane protein
22	group_1067		SRS3010019	1	1105964	1106356	-	hypothetical protein	1	1106356	1105964	-	Putative prophage membrane protein
22	yejK_1		SRS3010019	1	1106588	1107763	+	Nucleoid-associated protein YejK	1	1106588	1107763	+	37 kDa nucleoid-associated protein
22	group_536		SRS3010019	1	1107766	1108989	+	hypothetical protein	1	1107766	1108989	+	hypothetical protein
22	group_537		SRS3010019	1	1108960	1109316	-	hypothetical protein	1	1109316	1108960	-	Antitermination protein Q
26	group_237		SRS3010019	1	1109334	1110323	-	hypothetical protein	1	1110323	1109334	-	Uncharacterized protein, YdfU family
28	group_129		SRS3010019	1	1110331	1111191	-	hypothetical protein	1	1111191	1110331	-	Phage protein
24	group_1069	rusA	SRS3010019	1	1111208	1111597	-	Crossover junction endodeoxyribonuclease RusA	1	1111597	1111208	-	Holliday junction resolvase / Crossover junction endodeoxyribonuclease rusA (EC 3.1.22.-)
24	group_1070	dam_1	SRS3010019	1	1111606	1112487	-	DNA adenine methylase	1	1112487	1111606	-	Putative DNA methylase
22	group_1071		SRS3010019	1	1112484	1112957	-	hypothetical protein	1	1112957	1112484	-	FIG01048924: hypothetical protein
24	group_538		SRS3010019	1	1112954	1113928	-	hypothetical protein	1	1113928	1112954	-	Hypothetical protein, PV83 orf 20 homolog [SA bacteriophages 11, Mu50B]
35	group_539		SRS3010019	1	1113925	1114149	-	hypothetical protein	1	1114149	1113925	-	FIG00638770: hypothetical protein
22	group_1072		SRS3010019	1	1114146	1115288	-	hypothetical protein	1	1115288	1114146	-	rha protein
35	group_1073		SRS3010019	1	1115285	1115839	-	hypothetical protein	1	1115839	1115285	-	Uncharacterized protein YmfL
47	group_1074		SRS3010019	1	1115868	1116092	-	hypothetical protein	1	1116092	1115868	-	Phage DNA-binding protein
29	group_1075		SRS3010019	1	1116190	1116885	+	putative HTH-type transcriptional regulator	1	1116190	1116885	+	regulatory protein
30	group_540		SRS3010019	1	1117538	1118071	+	hypothetical protein	1	1117700	1118071	+	Uncharacterized protein YfdP
16	ycdX		SRS3010019	1	1225448	1226185	-	putative phosphatase YcdX	1	1226185	1225448	-	Putative hydrolase YcdX (EC 3.1.-.-)
61	group_136		SRS3010019	2	50754	52520	-	hypothetical protein	2	52520	50754	-	hypothetical protein	Prophage Region 6
61	group_1104		SRS3010019	2	53115	54023	-	hypothetical protein	2	54023	53115	-	Phage baseplate assembly protein
61	group_1110		SRS3010019	2	62736	63443	+	hypothetical protein	2	62736	63443	+	hypothetical protein
64	dinI_3		SRS3010019	2	64876	65109	-	DNA damage-inducible protein I	2	65109	64876	-	hypothetical protein
63	group_1111		SRS3010019	2	65121	65309	-	hypothetical protein	2	65309	65121	-	hypothetical protein
61	group_2373		SRS3010019	2	65472	67880	-	hypothetical protein	2	67880	65472	-	Phage replication protein
62	dam_2		SRS3010019	2	67871	68728	-	DNA adenine methylase	2	68728	67871	-	Methyl-directed repair DNA adenine methylase (EC 2.1.1.72)
62	group_1113		SRS3010019	2	68725	69021	-	hypothetical protein	2	69021	68725	-	Putative uncharacterized protein ORFD in retron EC67
62	ybiI_2		SRS3010019	2	69018	69245	-	putative protein YbiI	2	69245	69018	-	Hypothetical Zinc-finger containing protein
62	group_596		SRS3010019	2	69245	69478	-	hypothetical protein	2	69478	69245	-	corresponds to STY4639 from Accession AL513382: Salmonella typhi CT18
62	group_1114		SRS3010019	2	69581	69730	-	hypothetical protein	2	69730	69581	-	hypothetical protein
62	group_1115		SRS3010019	2	69730	70158	-	hypothetical protein	2	70158	69730	-	FIG00638630: hypothetical protein
62	group_1116		SRS3010019	2	70213	70563	-	hypothetical protein	2	70371	70213	-	Phage protein
62	group_1117		SRS3010019	2	70527	70727	-	hypothetical protein	2	70727	70527	-	hypothetical protein
62	group_1118		SRS3010019	2	71642	72274	+	hypothetical protein	2	71642	72274	+	Phage repressor protein cI
65	xerH		SRS3010019	2	72277	73302	+	Tyrosine recombinase XerH	2	72277	73302	+	Phage integrase
18	group_1119		SRS3010019	2	73631	73792	+	hypothetical protein	2	73631	73792	+	Phage integrase, Phage P4-associated
18	intA_2		SRS3010019	2	73789	74859	+	Prophage integrase IntA	2	73789	74859	+	Prophage CP4-57 integrase
73	group_600		SRS3010019	2	75142	76698	+	hypothetical protein	2	75142	76698	+	Recombinase
72	spo0C		SRS3010019	2	76688	77584	+	Chromosome-partitioning protein Spo0J	2	76688	77584	+	Chromosome (plasmid) partitioning protein ParB
50	noc		SRS3010019	2	77581	78477	+	Nucleoid occlusion protein	2	77581	78477	+	Bll0873 protein	Potential MGE
18	group_1122		SRS3010019	2	79530	80975	-	hypothetical protein	2	80975	79530	-	hypothetical protein
18	group_601		SRS3010019	2	81662	82369	+	hypothetical protein	2	81662	82369	+	hypothetical protein
40	group_1123		SRS3010019	2	83148	83933	-	hypothetical protein	2	83933	83148	-	hypothetical protein
18	group_1124		SRS3010019	2	84244	85536	-	hypothetical protein	2	85536	84244	-	hypothetical protein
39	group_273		SRS3010019	2	86687	87127	+	hypothetical protein	2	86687	87127	+	hypothetical protein
18	group_602		SRS3010019	2	87143	88096	+	hypothetical protein	2	87143	88096	+	hypothetical protein
18	group_1125		SRS3010019	2	88294	88701	+	hypothetical protein	2	88294	88701	+	hypothetical protein
18	group_3542		SRS3010019	2	88698	89939	+	hypothetical protein	2	88698	89939	+	hypothetical protein
42	group_1126		SRS3010019	2	90128	90400	+	hypothetical protein	2	90128	90400	+	hypothetical protein
42	group_1127		SRS3010019	2	90450	90836	+	hypothetical protein	2	90450	90836	+	orf; Other or unknown (Phage or Prophage Related)
42	group_1128		SRS3010019	2	90863	91183	+	hypothetical protein	2	90863	91183	+	hypothetical protein
52	group_603		SRS3010019	2	91325	91750	-	hypothetical protein	2	91750	91325	-	hypothetical protein
18	group_1129		SRS3010019	2	91886	92284	+	hypothetical protein	2	91886	92284	+	hypothetical protein
18	group_1130		SRS3010019	2	92373	92486	+	hypothetical protein	2	92373	92486	+	hypothetical protein
18	group_1131		SRS3010019	2	92732	93295	+	hypothetical protein	2	92732	93295	+	hypothetical protein
68	group_1132		SRS3010019	2	93366	93671	+	hypothetical protein	2	93321	93671	+	hypothetical protein
60	group_1133		SRS3010019	2	93855	94130	-	hypothetical protein	2	94130	93855	-	hypothetical protein
18	group_1134		SRS3010019	2	94334	94540	-	hypothetical protein	2	94540	94334	-	Putative DNA-binding protein
18	group_1135		SRS3010019	2	94663	95517	-	hypothetical protein	2	95517	94663	-	hypothetical protein
67	group_1136		SRS3010019	2	96259	97251	+	hypothetical protein	2	96259	97251	+	hypothetical protein
18	group_1137		SRS3010019	2	97611	98105	-	hypothetical protein	2	98105	97611	-	hypothetical protein
18	group_1138		SRS3010019	2	98160	99383	-	hypothetical protein	2	99383	98160	-	Transcriptional regulator, Xre family
18	group_1139		SRS3010019	2	99380	100024	-	hypothetical protein	2	100024	99380	-	hypothetical protein
18	group_1140		SRS3010019	2	100301	100603	+	hypothetical protein	2	100301	100603	+	Transporter, LysE family
1	group_1146		SRS3010019	2	560052	560198	+	hypothetical protein	2	560052	560198	+	hypothetical protein	Potential MGE
1	group_1147		SRS3010019	2	560296	561081	+	hypothetical protein	2	560296	561081	+	hypothetical protein
1	group_1148		SRS3010019	2	561181	561372	-	hypothetical protein	2	561372	561181	-	hypothetical protein
1	group_1149		SRS3010019	2	561592	561816	-	hypothetical protein	2	561816	561592	-	hypothetical protein
1	clpP_2		SRS3010019	2	561970	563925	-	ATP-dependent Clp protease proteolytic subunit	2	563925	561970	-	Prophage Clp protease-like protein
1	group_1151		SRS3010019	2	563922	564116	-	hypothetical protein	2	564116	563922	-	hypothetical protein
1	group_1152		SRS3010019	2	564266	564619	-	hypothetical protein	2	564619	564266	-	hypothetical protein
1	group_1153		SRS3010019	2	564911	566710	-	hypothetical protein	2	566710	564911	-	Zinc binding domain / DNA primase, Phage P4-associated / Replicative helicase RepA, Phage P4-associated
1	group_1154		SRS3010019	2	566707	567075	-	hypothetical protein	2	567075	566707	-	hypothetical protein
1	group_1155		SRS3010019	2	567072	567380	-	hypothetical protein	2	567380	567072	-	hypothetical protein
1	group_1156		SRS3010019	2	567373	567564	-	hypothetical protein	2	567564	567373	-	hypothetical protein
1	group_615		SRS3010019	2	567557	568420	-	hypothetical protein	2	568420	567557	-	hypothetical protein
1	group_1157		SRS3010019	2	568932	569615	-	hypothetical protein	2	569615	568932	-	hypothetical protein
1	group_1158		SRS3010019	2	569602	571035	-	hypothetical protein	2	571035	569602	-	Phage integrase
1	intS_4		SRS3010019	3	331513	332760	+	Prophage integrase IntS	3	331513	332760	+	Integrase	Potential MGE
51	group_1212		SRS3010019	3	332871	333740	+	hypothetical protein	3	332871	333740	+	hypothetical protein
80	group_1213		SRS3010019	3	333987	334412	-	hypothetical protein	3	334412	333987	-	hypothetical protein
1	group_1214		SRS3010019	3	334836	335039	+	hypothetical protein	3	334836	335039	+	Putative DNA-binding protein
20	xerC_1		SRS3010019	3	335420	336625	+	Tyrosine recombinase XerC	3	335420	336625	+	putative site specific recombinase
77	group_630		SRS3010019	3	336627	337937	+	hypothetical protein	3	336627	337937	+	hypothetical protein
1	group_300		SRS3010019	3	337937	339568	+	hypothetical protein	3	337937	339568	+	hypothetical protein
21	group_1215		SRS3010019	3	339569	339967	+	hypothetical protein	3	339569	339967	+	hypothetical protein
57	group_1216		SRS3010019	3	340065	340478	+	hypothetical protein	3	340065	340478	+	hypothetical protein
69	group_117		SRS3010019	3	340874	342052	+	hypothetical protein	3	340874	342052	+	hypothetical protein
1	group_1217		SRS3010019	3	342130	342504	-	hypothetical protein	3	342504	342130	-	putative lipoprotein
1	group_1218		SRS3010019	3	342534	343202	-	hypothetical protein	3	343202	342534	-	hypothetical protein
1	group_1219		SRS3010019	3	343513	344757	-	hypothetical protein	3	344757	343513	-	hypothetical protein
7	group_301		SRS3010019	3	344757	345170	-	hypothetical protein	3	345170	344757	-	hypothetical protein
66	group_1220		SRS3010019	3	345660	345980	+	hypothetical protein	3	345660	345980	+	hypothetical protein
71	group_1221		SRS3010019	3	345915	346079	-	hypothetical protein	3
1	group_1222	intA_4	SRS3010019	3	346459	346659	-	Prophage integrase IntA	3	346659	346459	-	phage integrase family protein
1	group_1223		SRS3010019	3	346815	347087	+	hypothetical protein	3	346815	347087	+	hypothetical protein
1	group_1224		SRS3010019	3	347087	348475	+	hypothetical protein	3	347087	348475	+	hypothetical protein
1	group_1225		SRS3010019	3	348468	349580	+	hypothetical protein	3	348468	349580	+	hypothetical protein
1	group_1226		SRS3010019	3	349577	350206	+	hypothetical protein	3	349577	350206	+	hypothetical protein
1	group_631		SRS3010019	3	350239	352008	+	hypothetical protein	3	350239	352008	+	Phage T7 exclusion protein
19	group_1227		SRS3010019	3	352020	352763	+	hypothetical protein	3	352020	352763	+	Phage T7 exclusion protein associated hypothetical protein
1	queC_2		SRS3010019	3	352763	354103	+	7-cyano-7-deazaguanine synthase	3	352763	354103	+	FIG014574: hypothetical protein
53	ycfH_2		SRS3010019	3	354100	354825	+	putative metal-dependent hydrolase YcfH	3	354100	354825	+	Putative deoxyribonuclease similar to YcfH, type 4
1	group_1229		SRS3010019	3	355276	355434	-	hypothetical protein	3	355434	355276	-	hypothetical protein
38	rpsT		SRS3010019	3	492689	492952	-	30S ribosomal protein S20	3	492952	492689	-	SSU ribosomal protein S20p
55	ccmH_3		SRS3010019	4	39	620	+	Cytochrome c-type biogenesis protein CcmH	4	3	620	+	Cytochrome c heme lyase subunit CcmL / Cytochrome c heme lyase subunit CcmH
41	group_145		SRS3010019	4	190030	190365	+	hypothetical protein	4	190030	190365	+	Unknown substrate:proton symporter, NAT/NCS2 family
44	group_1239		SRS3010019	4	190329	190424	-	hypothetical protein
17	dinI_4		SRS3010019	5	1595	1828	+	DNA damage-inducible protein I	5	1595	1828	+	DNA-damage-inducible protein I	Potential MGE
14	group_7880		SRS3010019	5	2228	2830	+	hypothetical protein	5	2228	2830	+	Gifsy-2 prophage protein STM1020/STM2620
37	group_146		SRS3010019	5	3039	3650	+	hypothetical protein	5	3039	3650	+	Phage protein
27	ylcG_2		SRS3010019	5	3647	3784	+	putative protein YlcG	5	3647	3784	+	Phage protein
27	dnaJ_2		SRS3010019	5	3784	4593	+	hypothetical protein	5	3784	4593	+	Phage antitermination protein Q
31	group_658		SRS3010019	5	5033	5248	+	hypothetical protein	5	5033	5248	+	hypothetical protein
31	rrrD_2		SRS3010019	5	5226	5714	+	Lysozyme RrrD	5	5226	5714	+	Lysozyme (EC 3.2.1.17) @ Phage lysozyme (EC 3.2.1.17)
36	group_1250		SRS3010019	5	5699	6202	+	hypothetical protein	5	5699	6202	+	Rz endopeptidase from lambdoid phage
34	pliG		SRS3010019	5	6391	6792	-	Inhibitor of g-type lysozyme	5	6792	6391	-	Inhibitor of vertebrate g-type lysozyme, periplasmic => PliG
87	group_236		SRS3010019	5	7071	7589	+	hypothetical protein	5	7071	7589	+	hypothetical protein
46	group_348		SRS3010019	5	119382	120038	-	hypothetical protein	5	120038	119382	-	hypothetical protein
82	group_405		SRS3010019	9	684	1094	-	hypothetical protein	9	1094	684	-	Gifsy-1 prophage cI	Prophage Region 8
6	group_381		SRS3010019	9	1265	1732	+	hypothetical protein	9	1427	1732	+	hypothetical protein
79	group_1274		SRS3010019	9	1761	1991	+	hypothetical protein	9	1761	1991	+	hypothetical protein
1	group_1275		SRS3010019	9	1988	2491	+	hypothetical protein	9	1988	2491	+	hypothetical protein
8	group_382		SRS3010019	9	2520	2726	-	hypothetical protein	9	2726	2520	-	FIG01046771: hypothetical protein
1	ydfB		SRS3010019	9	3014	3103	+	putative protein YdfB	9	3014	3103	+	Uncharacterized protein YdfB
1	group_1277		SRS3010019	9	3100	3228	+	hypothetical protein	9	3100	3228	+	hypothetical protein
1	group_1278		SRS3010019	9	3347	3643	+	hypothetical protein	9	3347	3643	+	host-nuclease inhibitor protein
3	group_1279		SRS3010019	9	3649	4392	+	hypothetical protein	9	3649	4392	+	Phage integrase family protein
3	group_1280		SRS3010019	9	4392	5012	+	hypothetical protein	9	4392	5012	+	phage-related exonuclease
23	dam_4		SRS3010019	9	5009	5905	+	DNA adenine methylase	9	5009	5905	+	Putative DNA methylase
5	group_94		SRS3010019	9	5908	6150	+	hypothetical protein	9	5908	6150	+	hypothetical protein
5	group_1281		SRS3010019	9	6192	6539	+	hypothetical protein	9	6192	6539	+	hypothetical protein
5	xerD_3		SRS3010019	9	6566	7579	+	Tyrosine recombinase XerD	9	6566	7579	+	Phage integrase
9	group_390		SRS3010019	11	3722	4069	+	hypothetical protein	11	3722	4069	+	Phage holin	Potential MGE
1	group_1289		SRS3010019	11	4072	4686	+	hypothetical protein	11	4072	4686	+	Lytic enzyme
4	group_119		SRS3010019	11	5286	5699	+	hypothetical protein	11	5286	5699	+	hypothetical protein
48	group_120		SRS3010019	11	5764	6735	+	hypothetical protein	11	5764	6735	+	hypothetical protein
12	group_700		SRS3010019	11	6725	7996	+	hypothetical protein	11	6725	7996	+	hypothetical protein
13	group_701		SRS3010019	11	7996	9426	+	hypothetical protein	11	7996	9426	+	hypothetical protein
11	group_702		SRS3010019	11	9398	10273	+	hypothetical protein	11	9398	10273	+	hypothetical protein
11	mutT3		SRS3010019	11	10274	11848	+	Putative 8-oxo-dGTP diphosphatase 3	11	10274	11848	+	TolA protein
11	group_391		SRS3010019	11	11869	12741	+	hypothetical protein	11	11869	12741	+	hypothetical protein
11	group_1290		SRS3010019	11	12759	13790	+	hypothetical protein	11	12759	13790	+	hypothetical protein
11	group_703		SRS3010019	11	13857	14342	+	hypothetical protein	11	13857	14342	+	hypothetical protein
33	group_1291		SRS3010019	11	14355	14780	+	hypothetical protein	11	14355	14780	+	hypothetical protein
33	group_392		SRS3010019	11	14777	15208	+	hypothetical protein	11	14777	15208	+	hypothetical protein
49	group_1292		SRS3010019	11	15192	16130	+	hypothetical protein	11	15192	16130	+	hypothetical protein
43	group_1293		SRS3010019	11	16135	17529	+	hypothetical protein	11	16135	17529	+	hypothetical protein
49	group_1294		SRS3010019	11	17533	17970	+	hypothetical protein	11	17533	17970	+	hypothetical protein
49	group_704		SRS3010019	11	17970	18557	+	hypothetical protein	11	17970	18557	+	hypothetical protein
49	group_393		SRS3010019	11	18681	20735	+	hypothetical protein	11	18681	20735	+	Phage protein
58	group_705		SRS3010019	11	20735	21451	+	hypothetical protein	11	20735	21451	+	hypothetical protein
58	group_1295		SRS3010019	11	21448	21723	+	hypothetical protein	11	21448	21723	+	hypothetical protein
45	group_706		SRS3010019	11	21723	22766	+	hypothetical protein	11	21723	22766	+	hypothetical protein
32	group_394		SRS3010019	11	22763	23479	+	hypothetical protein	11	22763	23479	+	hypothetical protein
11	group_1296		SRS3010019	11	23476	23808	+	hypothetical protein	11	23476	23808	+	hypothetical protein
10	group_1297		SRS3010019	11	23805	25031	+	hypothetical protein	11	23805	25031	+	hypothetical protein
11	group_1298		SRS3010019	11	25015	25641	+	hypothetical protein	11	25015	25641	+	hypothetical protein
1	group_1299	tfaE_3	SRS3010019	11	27347	27925	+	Prophage tail fiber assembly protein TfaE	11	27347	27925	+	Phage tail fiber assembly protein
70	dinI_5		SRS3010019	32	3	236	+	DNA damage-inducible protein I	32	3	236	+	DNA-damage-inducible protein I
107	group_2941		SRS3643364	177	12	149	+	hypothetical protein	177	209	3	-	Fels-1 prophage protein	Potential MGE
99	group_2762		SRS3721796	3	470622	471176	-	hypothetical protein	3	469690	471339	+	Phage tail fiber, side tail fiber protein Stf	Potential MGE
95	group_352	flp	SRS3721796	5	231826	232047	+	hypothetical protein	5	231826	232047	+	UPF0214 protein YfeW
89	group_1999		SRS3721796	9	204729	205808	-	hypothetical protein	9	205808	204729	-	Phage integrase	Prophage Region 5
94	group_2000		SRS3721796	9	206122	206550	-	hypothetical protein	9	206550	206122	-	hypothetical protein
94	group_2001	recE_2	SRS3721796	9	207703	210408	-	Exodeoxyribonuclease 8	9	210408	207703	-	Exodeoxyribonuclease VIII
91	group_1392		SRS3721796	9	210549	210884	-	hypothetical protein	9	210884	210549	-	hypothetical protein
96	group_2002		SRS3721796	9	210959	211243	-	hypothetical protein	9	211243	210959	-	hypothetical protein
97	group_1394		SRS3721796	9	211762	212028	-	hypothetical protein	9	212028	211762	-	hypothetical protein
97	ydfB_1		SRS3721796	9	212025	212132	-	putative protein YdfB	9	212132	212025	-	hypothetical protein
98	group_2003		SRS3721796	9	212431	212763	-	hypothetical protein	9	212829	212431	-	Phage transcriptional regulator cro
101	group_2004		SRS3721796	9	221439	221993	+	hypothetical protein	9	221439	221993	+	Phage antitermination protein Q
101	group_2005		SRS3721796	9	222200	222736	+	hypothetical protein	9	222200	222736	+	hypothetical protein
101	rrrD_1		SRS3721796	9	223149	223688	+	Lysozyme RrrD	9	223149	223688	+	Phage lysozyme R
101	group_2007		SRS3721796	9	223789	224253	+	hypothetical protein	9	223789	224253	+	Phage endopeptidase Rz
101	group_2008		SRS3721796	9	224480	224662	+	hypothetical protein	9	224480	224662	+	hypothetical protein
104	group_2009		SRS3721796	9	224733	225464	+	hypothetical protein	9	224733	225464	+	Phage terminase, small subunit
104	group_2010		SRS3721796	9	225430	226851	+	putative protein	9	225430	226851	+	Phage terminase, large subunit
102	group_2014		SRS3721796	9	231960	232307	+	hypothetical protein	9	231960	232307	+	ABC-type multidrug transport system, ATPase and permease components
102	group_2015		SRS3721796	9	232314	232760	+	hypothetical protein	9	232314	232760	+	hypothetical protein
90	group_445		SRS3721796	9	234211	235695	+	hypothetical protein	9	234211	235695	+	Phage protein
90	group_2017		SRS3721796	9	235696	236142	+	hypothetical protein	9	235696	236142	+	hypothetical protein
90	group_836		SRS3721796	9	236142	236546	+	hypothetical protein	9	236142	236546	+	hypothetical protein
90	mltD_1		SRS3721796	9	236754	238925	+	Membrane-bound lytic murein transglycosylase D	9	236754	238925	+	Membrane-bound lytic murein transglycosylase D
90	group_837		SRS3721796	9	238922	239632	+	hypothetical protein	9	238922	239632	+	hypothetical protein
90	group_2019		SRS3721796	9	239632	239934	+	hypothetical protein	9	239632	239934	+	hypothetical protein
90	group_2020		SRS3721796	9	239931	240800	+	hypothetical protein	9	239931	240800	+	hypothetical protein
90	group_2021		SRS3721796	9	240781	241458	+	hypothetical protein	9	240781	241458	+	phage P2 baseplate assembly protein gpV
90	group_2022		SRS3721796	9	241471	241827	+	hypothetical protein	9	241471	241827	+	hypothetical protein
90	group_2023		SRS3721796	9	241824	243065	+	hypothetical protein	9	241824	243065	+	IS, phage, Tn, Transposon-related functions
90	group_2024		SRS3721796	9	243067	243669	+	hypothetical protein	9	243067	243669	+	IS, phage, Tn, Transposon-related functions
96	group_32		SRS3721796	9	243659	245110	+	hypothetical protein	9	243659	245110	+	Phage tail fiber, side tail fiber protein Stf
94	group_2025	tfaE_2	SRS3721796	9	245110	245679	+	Prophage tail fiber assembly protein TfaE	9	245110	245679	+	Phage tail fiber, tail fiber assembly protein Tfa
94	group_2026		SRS3721796	9	246037	246291	+	hypothetical protein	9	246037	246291	+	Acetyltransferase
94	cotSA_1		SRS3721796	9	246452	247594	-	Spore coat protein SA	9	247594	246452	-	Lipopolysaccharide 1,2-N-acetylglucosaminetransferase
78	group_838		SRS3721796	14	75550	76125	-	hypothetical protein	14	75568	76155	+	ABC transporter involved in cytochrome c biogenesis, ATPase component CcmA
103	group_191		SRS3799118	1	1076	1198	+	hypothetical protein	1	1076	1198	+	Phage DNA invertase	Potential MGE
100	group_2028		SRS3799118	4	45	617	+	hypothetical protein	4	580	2	-	ABC transporter involved in cytochrome c biogenesis, ATPase component CcmA
106	group_2376		SRS3799118	31	21	581	-	hypothetical protein	31	583	2	-	ABC transporter involved in cytochrome c biogenesis, CcmB subunit
