# Supplementary material for: Genomic characterization and phylogenetic analysis of Salmonella enterica serovar Javiana
Source: PeerJ journal article supplement (doi:10.7717/peerj.10256), 2020-11-20

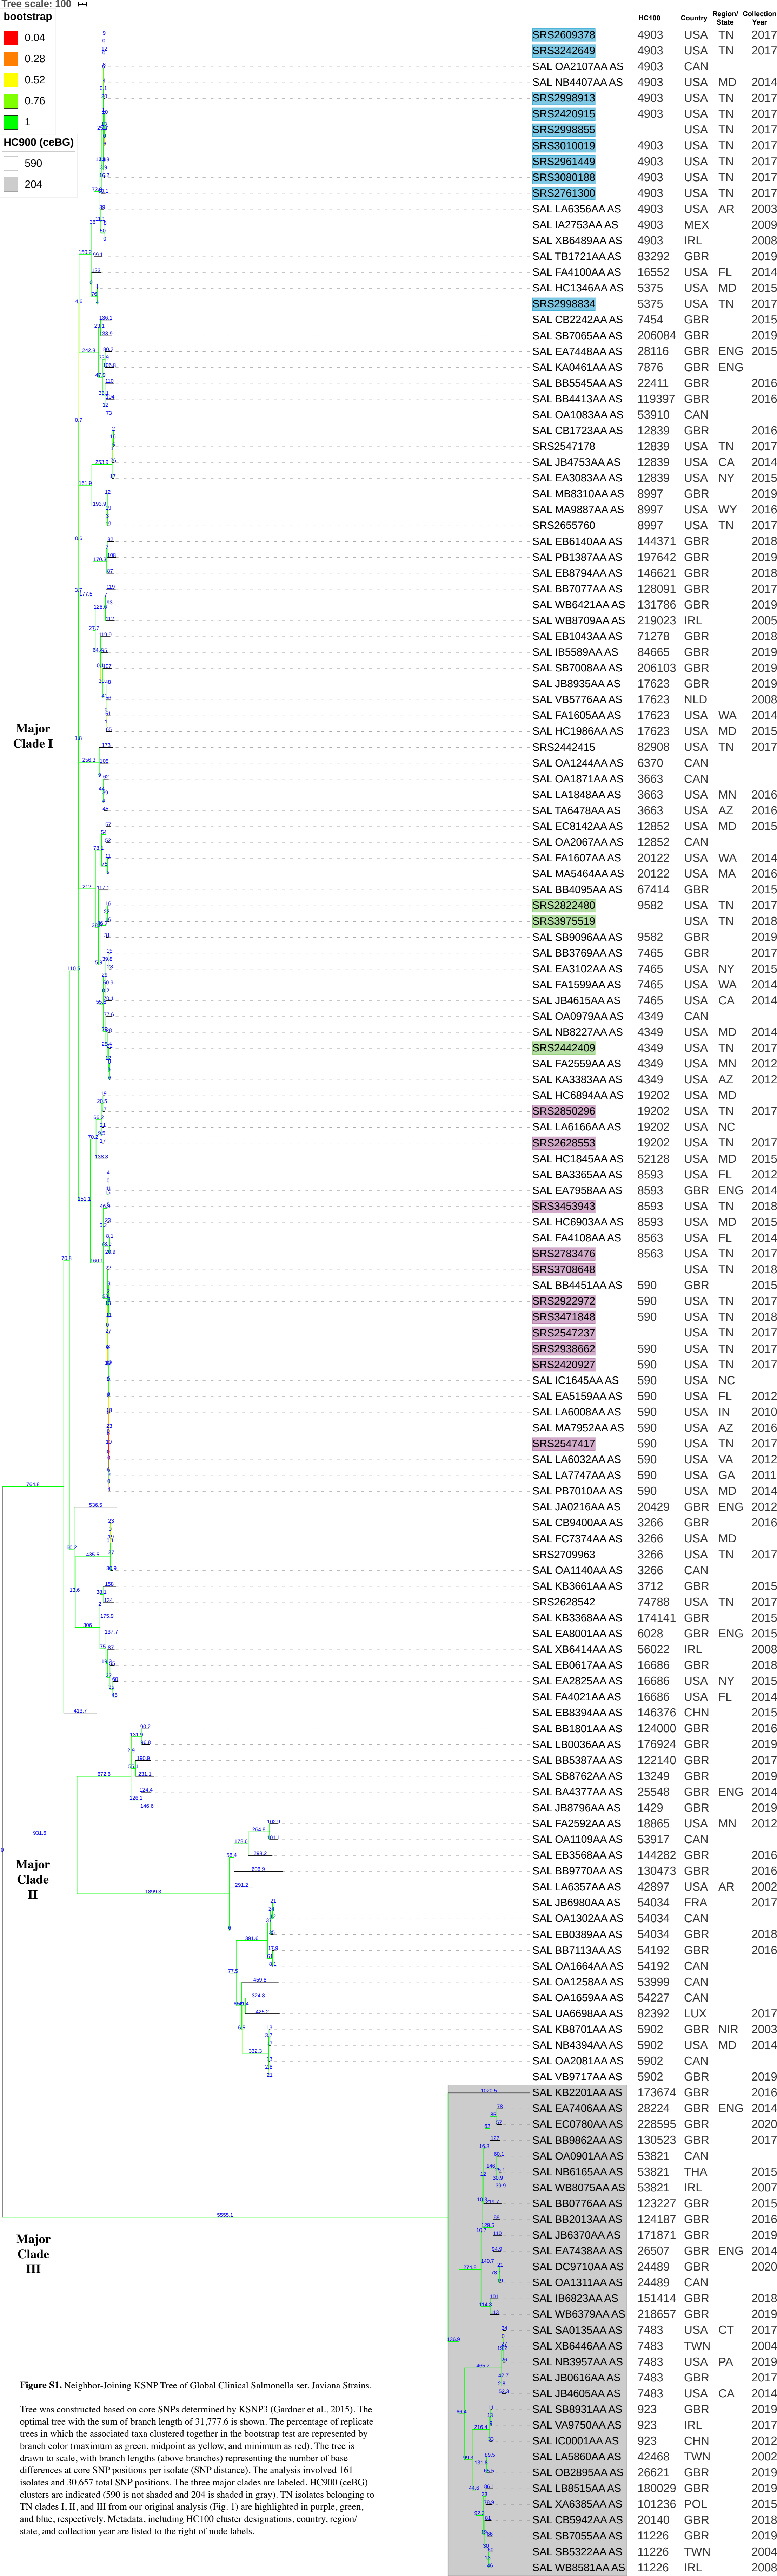

Supplement: Figure_S1_javiana_human_intl_ksnp_core.pdf [file Figure_S1_javiana_human_intl_ksnp_core.pdf]
