# Supplementary material for: Genomic characterization and phylogenetic analysis of Salmonella enterica serovar Javiana
Source: PeerJ journal article supplement (doi:10.7717/peerj.10256), 2020-11-20
Supplement: Figure_S4_c2-plasmid_2.pdf [file Figure_S4_c2-plasmid_2.pdf]

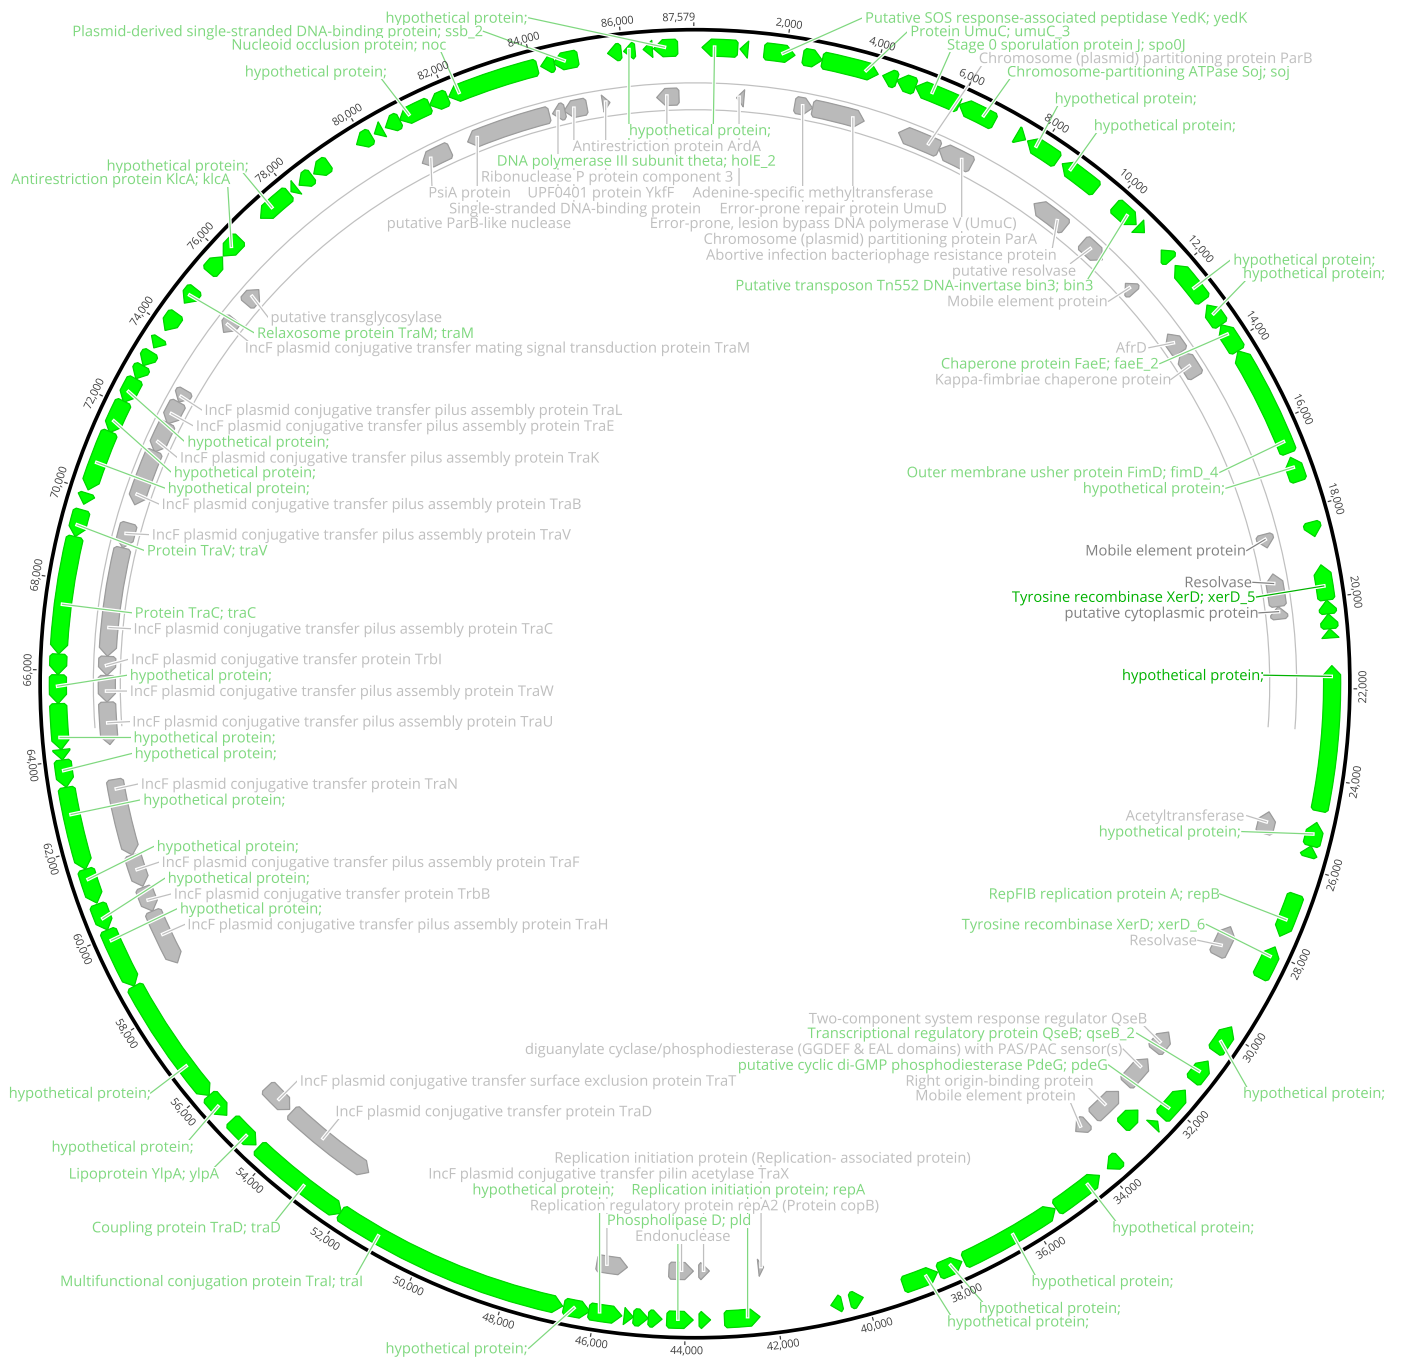

**Figure S4. Clade II Plasmid**

Circular representation of the 87.5 kb found in TN clade II isolate SRS2822480. Genes in green signify over-represented Clade II genes and their corresponding Prokka annotations. RASTtk annotations that differ from the Prokka annotations are in gray. Figure was created using Geneious Prime 2019.1.1 (<https://www.geneious.com>).
